# Supplementary material for: Association of magnesium intake with type 2 diabetes and total stroke: an updated systematic review and meta-analysis
Source: PubMed Central journal article supplement — BMJ Open. 2020 Mar 19;10(3):e032240. doi: 10.1136/bmjopen-2019-032240 (PMC7103847; doi:10.1136/bmjopen-2019-032240), 2020-03-19
Supplement: bmjopen-2019-032240.draft_revisions.pdf [file bmjopen-2019-032240.draft_revisions.pdf]

# BMJ Open

BMJ Open is committed to open peer review. As part of this commitment we make the peer review history of every article we publish publicly available.

When an article is published we post the peer reviewers' comments and the authors' responses online. We also post the versions of the paper that were used during peer review. These are the versions that the peer review comments apply to.

The versions of the paper that follow are the versions that were submitted during the peer review process. They are not the versions of record or the final published versions. They should not be cited or distributed as the published version of this manuscript.

BMJ Open is an open access journal and the full, final, typeset and author-corrected version of record of the manuscript is available on our site with no access controls, subscription charges or pay-per-view fees (<http://bmjopen.bmj.com>).

If you have any questions on BMJ Open's open peer review process please email [info.bmjopen@bmj.com](mailto:info.bmjopen@bmj.com)

# BMJ Open

## Magnesium intake has inverse association with type 2 diabetes and total stroke: An updated systematic review and meta-analysis

|                               |                                                                                                                                                                                                                                                                                                                                                                                                                                                                                                                                                                                                                                                                                                                                                                                                                                                                                                                                                     |
|-------------------------------|-----------------------------------------------------------------------------------------------------------------------------------------------------------------------------------------------------------------------------------------------------------------------------------------------------------------------------------------------------------------------------------------------------------------------------------------------------------------------------------------------------------------------------------------------------------------------------------------------------------------------------------------------------------------------------------------------------------------------------------------------------------------------------------------------------------------------------------------------------------------------------------------------------------------------------------------------------|
| Journal:                      | <i>BMJ Open</i>                                                                                                                                                                                                                                                                                                                                                                                                                                                                                                                                                                                                                                                                                                                                                                                                                                                                                                                                     |
| Manuscript ID                 | bmjopen-2019-032240                                                                                                                                                                                                                                                                                                                                                                                                                                                                                                                                                                                                                                                                                                                                                                                                                                                                                                                                 |
| Article Type:                 | Research                                                                                                                                                                                                                                                                                                                                                                                                                                                                                                                                                                                                                                                                                                                                                                                                                                                                                                                                            |
| Date Submitted by the Author: | 11-Jun-2019                                                                                                                                                                                                                                                                                                                                                                                                                                                                                                                                                                                                                                                                                                                                                                                                                                                                                                                                         |
| Complete List of Authors:     | Zhao, Binghao; First Affiliated Hospital of Nanchang University, Department of Thoracic Surgery<br>Zeng, Lianli; The second affiliated hospital of Nanchang University, Department of Cardiovascular Medicine<br>Zhao, Jiani; The second affiliated hospital of Nanchang University, Department of Cardiovascular Medicine<br>Wu, Qian; The second affiliated hospital of Nanchang University, Department of Cardiovascular Medicine<br>Dong, Yifei; The second affiliated hospital of Nanchang University, Department of Cardiovascular Medicine<br>Zou, Fang; The second affiliated hospital of Nanchang University, Department of Endocrinology<br>Gan, Li; The second affiliated hospital of Nanchang University, Department of Neurology<br>Wei, Yiping; First Affiliated Hospital of Nanchang University, Department of Thoracic Surgery<br>Zhang, Wenxiong; First Affiliated Hospital of Nanchang University, Department of Thoracic Surgery |
| Keywords:                     | Magnesium Intake, Type 2 Diabetes, Stroke < NEUROLOGY, Meta-Analysis                                                                                                                                                                                                                                                                                                                                                                                                                                                                                                                                                                                                                                                                                                                                                                                                                                                                                |
|                               |                                                                                                                                                                                                                                                                                                                                                                                                                                                                                                                                                                                                                                                                                                                                                                                                                                                                                                                                                     |

SCHOLARONE™  
Manuscripts

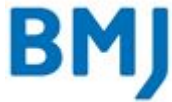

I, the Submitting Author has the right to grant and does grant on behalf of all authors of the Work (as defined in the below author licence), an exclusive licence and/or a non-exclusive licence for contributions from authors who are: i) UK Crown employees; ii) where BMJ has agreed a CC-BY licence shall apply, and/or iii) in accordance with the terms applicable for US Federal Government officers or employees acting as part of their official duties; on a worldwide, perpetual, irrevocable, royalty-free basis to BMJ Publishing Group Ltd ("BMJ") its licensees and where the relevant Journal is co-owned by BMJ to the co-owners of the Journal, to publish the Work in this journal and any other BMJ products and to exploit all rights, as set out in our [licence](#).

The Submitting Author accepts and understands that any supply made under these terms is made by BMJ to the Submitting Author unless you are acting as an employee on behalf of your employer or a postgraduate student of an affiliated institution which is paying any applicable article publishing charge ("APC") for Open Access articles. Where the Submitting Author wishes to make the Work available on an Open Access basis (and intends to pay the relevant APC), the terms of reuse of such Open Access shall be governed by a Creative Commons licence – details of these licences and which [Creative Commons](#) licence will apply to this Work are set out in our licence referred to above.

Other than as permitted in any relevant BMJ Author's Self Archiving Policies, I confirm this Work has not been accepted for publication elsewhere, is not being considered for publication elsewhere and does not duplicate material already published. I confirm all authors consent to publication of this Work and authorise the granting of this licence.

1 **Magnesium intake has inverse association with type 2 diabetes and total stroke:**  
2 **An updated systematic review and meta-analysis**

3 Binghao Zhao<sup>1,2</sup>; Lianli Zeng<sup>3,4</sup>; Jiani Zhao<sup>3,4</sup>; Qian Wu<sup>3,4</sup>; Yifei Dong<sup>3</sup>; Fang Zou<sup>5</sup>;  
4 Li Gan<sup>6</sup>; Yiping Wei<sup>1</sup>; Wenxiong Zhang<sup>1</sup>.

5 **Affiliations**

6 <sup>1</sup>Department of Cardio-Thoracic Surgery, The first affiliated hospital of Nanchang  
7 University, Nanchang, China, 330006.

8 <sup>2</sup>Departments of Neurosurgery, Peking Union Medical College Hospital, Chinese  
9 Academy of Medical Sciences and Peking Union Medical College, Beijing, China,  
10 100000.

11 <sup>3</sup>Department of Cardiovascular Medicine, The second affiliated hospital of Nanchang  
12 University, Nanchang, China, 330006.

13 <sup>4</sup>Jiangxi medical college, Nanchang University, 330006, Nanchang, China

14 <sup>5</sup>Department of Endocrinology, The second affiliated hospital of Nanchang University,  
15 Nanchang, China, 330006.

16 <sup>6</sup>Department of Neurology, The second affiliated hospital of Nanchang University,  
17 Nanchang, China, 330006.

18 **Corresponding Author:** Wenxiong Zhang, MD, Department of Cardio-Thoracic  
19 Surgery, The first affiliated hospital of Nanchang University, 17 Yongwai Main Street,  
20 Nanchang, P. R. China 330006; E-mail: [zwx123dr@126.com](mailto:zwx123dr@126.com); Phone:  
21 +8618720909414; Fax: 0791-86133161.

22 **Short running head:** Magnesium Intake Reduces Diabetes and Total Stroke.

23 **Word count:** 4350

1  
2  
3  
4 24 **Abstract**

5  
6 25 **Objective:** The detailed associations between type 2 diabetes (T2D) and total stroke  
7  
8  
9 26 and magnesium intake should be timely updated. And, we keep requiring evidence of  
10  
11 27 significant prevention of the two diseases. We conducted a systematic review and  
12  
13  
14 28 meta-analysis to quantify the association and to determine the dose-response  
15  
16  
17 29 relationships between magnesium intake and T2D and stroke.

18  
19 30 **Design:** Systematic review search, methodology and meta-analyses.

20  
21  
22 31 **Data sources:** PubMed, EMBASE, Cochrane Library, Web of Science and  
23  
24  
25 32 ClinicalTrials.gov.

26  
27 33 **Eligibility criteria:** Prospective cohort studies about magnesium intake and risk of  
28  
29  
30 34 T2D or stroke.

31  
32 35 **Data synthesis:** Relative risk (RR) and 95% confidence intervals (95% CI) were  
33  
34  
35 36 pooled for inclusion in random-effects models to calculate risk on T2D and stroke.

36  
37 37 **Results:** Forty-one studies involving 53 cohorts were included. The magnitude of the  
38  
39 38 risk was significantly reduced by 22% for T2D (RR, 0.78 [95% CI, 0.75-0.81];  $P <$   
40  
41 39 0.001), 11% for total stroke (RR, 0.89 [95% CI, 0.83-0.94];  $P <$  0.001), and 12% for  
42  
43 40 ischemic stroke (RR, 0.88 [95% CI, 0.81-0.95];  $P =$  0.001) comparing the highest  
44  
45 41 magnesium intake to the lowest. The inverse association still existed when studies on  
46  
47 42 T2D were adjusted for cereal fiber (RR, 0.79 [95% CI, 0.73-0.85];  $P <$  0.001) and  
48  
49 43 those on total stroke were adjusted for calcium (RR, 0.89 [95% CI, 0.80-0.99];  $P =$   
50  
51 44 0.040). Subgroup analyses suggested risk for total and ischemic stroke was  
52  
53 45 significantly decreased in females, participants with  $\geq 25$  mg/m<sup>2</sup> body mass index,  
54  
55  
56  
57  
58  
59  
60

1  
2  
3  
4 46 and those with  $\geq 12$ y follow-up, the reduced risk in Asia was not so conspicuous as in  
5  
6  
7 47 North America and Europe.

8  
9 48 **Conclusions:** Magnesium intake has significantly inverse associations with T2D and  
10  
11  
12 49 total stroke in a dose-dependent manner. Specific populations may receive more  
13  
14  
15 50 benefits from magnesium-rich dietary pattern. Feasible costless dietary approach  
16  
17  
18 51 needs to be highlighted in the primary prevention of T2D and total stroke by the  
19  
20  
21 52 public.

22 53

#### 23 24 25 54 **Strength and limitation**

26  
27 55 1. We conducted a quantitative analysis suggesting that magnesium intake has a  
28  
29 56 strong inverse association with T2D and total stroke.

30  
31 57 2. Magnesium-rich food consumption should be recommended for high-risk  
32  
33 58 individuals in dietary guidelines.

34  
35 59 3. Highlighting early management of T2D and stroke requires various efforts and  
36  
37 60 strategies.

38  
39 61 4. This study, which includes a considerable amount of evidence, assists with  
40  
41 62 innovation of the global dietary pattern.

42  
43 63 5. Although strong inverse associations for T2D and total stroke were reported,  
44  
45 64 individual-level studies having more detection power are required.

46  
47  
48 65

49  
50  
51 66 **Keywords:** Magnesium Intake; Type 2 Diabetes; Stroke; Meta-Analysis.

## 67 **Introduction**

68 Diabetes is a global burden with an alarming increasing rate throughout the world<sup>1,2</sup>.  
69 Stroke is an independent disorder and a typical macrovascular complication of type 2  
70 diabetes (T2D) treated as the second leading cause of death after ischemic heart  
71 disease<sup>3,4</sup>. These pandemic health problems require more primary prevention  
72 strategies.

73 Magnesium, common cellular ion, acts as critical cofactor for hundreds of  
74 enzymes involved in glucose metabolism, protein production, and nucleic acid  
75 synthesis<sup>5,6</sup>. Low levels of magnesium have been associated with many chronic and  
76 inflammatory diseases, such as Alzheimer's disease, asthma, attention deficit  
77 hyperactivity disorder, insulin resistance, T2D, hypertension, cardiovascular disease  
78 (e.g., stroke), migraine headaches, osteoporosis and cancer<sup>1,5,7,8</sup>.

79 Actually, many adults in developed countries do not successfully meet the  
80 recommended daily consumption of magnesium-rich foods such as whole grains, nuts,  
81 and green leafy vegetables, and magnesium is less mentioned in dietary guidelines  
82 and in studies about T2D or stroke prevention<sup>9,10</sup>. With this regard, we chose T2D and  
83 stroke as our outcome of interest (cardiovascular disease (CVD) was not elaborated  
84 because there are so many items relating to CVD and the definitions about CVD  
85 varied a lot among searched studies, which would enhance heterogeneity in the pooled  
86 process and impair our interpretation of the final conclusion). And, emerging  
87 studies<sup>11-51</sup> on this topic are limited, and the results still remain mixed possibly due to  
88 the limitations of small sample sizes and differences in intervention duration, study

1  
2  
3  
4 89 design, characteristics of participants. Moreover, consecutive meta-analyses<sup>52,53</sup> have  
5  
6 90 used less rigorous inclusion, the statistics were inadequate, the results were  
7  
8  
9 91 incomprehensive, and they did not completely address the influence of other  
10  
11 92 confounders (i.e., body mass index (BMI), cereal fiber, calcium, potassium) on the  
12  
13  
14 93 relationship. Accordingly, we performed a meta-analysis to (1) establish a  
15  
16  
17 94 comprehensive estimate and update the epidemiological evidence for clinical practice;  
18  
19 95 (2) discuss the results of stroke subtype and the impact of several statistical and  
20  
21 96 epidemiology confounders on the investigated association; and (3) highlight a detailed  
22  
23  
24 97 dose-response pattern for the participants in the studies analyzed.  
25  
26  
27  
28  
29

## 30 **Methods**

31  
32  
33 100 This study was reported according to the Meta-analysis of Observational Studies in  
34  
35 101 Epidemiology (MOOSE) Guidelines Checklist and the Preferred Reporting Items for  
36  
37 102 Systematic Reviews and Meta-Analyses (PRISMA) guidelines (**Table S1**)  
38  
39 103 (Registration information: PROSPERO CRD42018092690).  
40  
41  
42  
43  
44

## 45 105 **Search Strategy**

46  
47  
48 106 PubMed, EMBASE, Cochrane Library, Web of Science and ClinicalTrials.gov were  
49  
50 107 systematically reviewed through inception to March 15, 2019 for studies about  
51  
52 108 magnesium intake and T2D or stroke without language restrictions. The following key  
53  
54 109 words were used: “Magnesium”, “Type 2 Diabetes Mellitus”, “Type 2 Diabetes”,  
55  
56 110 “Stroke”, “Cerebrovascular Stroke”, “Cohort Studies”, and “Prospective Studies”. We  
57  
58  
59  
60



1  
2  
3  
4 111 also manually searched the reference lists of the retrieved literature (including  
5  
6 112 meta-analyses and brief reports), bibliographies and gray literature (including  
7  
8  
9 113 presentations and unpublished literature) for further eligible articles.  
10  
11  
12 114

### 14 115 **Selection Criteria**

16  
17 116 (1) Eligible populations must be composed of individuals with plausible  
18  
19 117 dietary/energy intake, who had no history of diabetes and/or insulin treatment for T2D  
20  
21  
22 118 analysis and no current stroke for stroke analysis. (2) Their apparent life expectancy  
23  
24  
25 119 was long enough for proper follow-up. (3) We only included prospective cohort  
26  
27 120 studies that reported magnesium intake and T2D and/or various types of stroke.  
28  
29  
30 121 Notably, magnesium intake contained dietary magnesium intake and total magnesium  
31  
32 122 intake (dietary and supplementary magnesium).  
33  
34

35 123 Only studies containing the most comprehensive information on the population  
36  
37  
38 124 or endpoints were included to avoid duplication. We excluded reviews, basic studies,  
39  
40 125 meta-analyses, etc.  
41  
42

43 126

### 45 127 **Data Extraction and Quality Assessments**

47  
48 128 Two researchers independently extracted the following information: the first author,  
49  
50  
51 129 publication year, period of cohort studies, duration of persistent exposure, basic  
52  
53 130 characteristics of the enrolled participants (weight, age, region, BMI, drinking and  
54  
55  
56 131 smoking habits (previous plus current), etc.), median magnesium intake for each  
57  
58  
59 132 quantile (tertile, quartile, or quintile), diabetes and total stroke cases, subtypes of total  
60

1  
2  
3  
4 133 stroke, dietary and case assessments, adjusted confounding covariates. Importantly,  
5  
6 134 total stroke is classified as clinical ischemic stroke (87%), hemorrhagic stroke (13%)  
7  
8  
9 135 and undetermined stroke<sup>54</sup>. Hemorrhagic stroke is classified as subarachnoid  
10  
11  
12 136 hemorrhage and intracerebral hemorrhage according to anatomical site or presumed  
13  
14 137 etiology<sup>55</sup>. In cases of continuing disagreement, a final decision was reached after  
15  
16  
17 138 discussion with a third member of the panel.

18  
19 139 Methodological quality was described by the Newcastle-Ottawa Scale (NOS),  
20  
21  
22 140 which was validated for assessment of the quality of nonrandomized controlled trials  
23  
24  
25 141 in meta-analyses<sup>56</sup>. As for 0-10 scale, each study was categorized as low (0-5),  
26  
27 142 medium (6-7), of high (8-10) quality.

28  
29  
30 143

#### 31 32 144 **Statistical Analysis**

33  
34  
35 145 Articles providing data separately for men and women or black and white or different  
36  
37 146 types of disease within an article were treated as independent studies. Multivariate  
38  
39  
40 147 relative risk (RR) and corresponding 95% confidence intervals (CI) for measuring the  
41  
42  
43 148 quantitative associations between exposure and T2D, total stroke and other wanted  
44  
45  
46 149 outcomes, particularly for the highest vs. the lowest categories of magnesium intake  
47  
48 150 were estimated by DerSimonian-Laird random effects model because the assumptions  
49  
50  
51 151 involved account for the presence of within-study and between-study variability.  
52  
53 152 Statistical heterogeneity was determined with the Cochran Q chi-square test and the  $I^2$ .  
54  
55  
56 153 An  $I^2 > 50\%$  or a  $P$  value for the Q test  $< 0.1$  was considered to indicate significant  
57  
58 154 heterogeneity<sup>57</sup>. We performed sensitivity analyses to test the robustness and  
59  
60

1  
2  
3  
4 155 post-subgroup analyses to detect source of heterogeneity. In addition, a  
5  
6 156 random-effects meta-regression analysis on BMI, sex, participants region, and dietary  
7  
8  
9 157 assessments with RR for each trial was performed to obtain an understanding of the  
10  
11 158 reasons for heterogeneity. RR and 95% CI might begin to significantly change as  
12  
13  
14 159 publication years increased in T2D and total stroke etc., which would be validated by  
15  
16  
17 160 cumulative meta-analyses.

18  
19 161 The dose-response analyses for all outcomes were proposed by Greenland and  
20  
21  
22 162 Longnecker<sup>58</sup> and Orsini<sup>59</sup> et al. The categories of magnesium intake, distributions of  
23  
24  
25 163 cases and person-year, RR and 95 CI were extracted. Once the number of cases and/or  
26  
27  
28 164 person-years was not available, variance-weighted least squares regression was used  
29  
30  
31 165 to pool the risk estimate. For most studies, the median intake for each quantile (tertile,  
32  
33 166 quartile or quintile) of magnesium intake was assigned as the representative dose. For  
34  
35  
36 167 continuous intake reported as category data with a range in some studies, we assigned  
37  
38 168 the mid-point category of the lower and upper bound to the RR in these studies; when  
39  
40  
41 169 the highest category was open ended, we assumed the length of the open ended  
42  
43 170 interval to be 1.5 times as the adjacent interval; when the lowest category was open,  
44  
45  
46 171 we assigned the adjacent interval of the category to be 1.5 times as the length of the  
47  
48  
49 172 open ended interval. We determined generalized least squares regression models to  
50  
51 173 calculate study-specific RR estimates per 50 mg/day, 100 mg/day, and 150 mg/day of  
52  
53  
54 174 magnesium intake increment if there was evidence for linear relationships. In addition,  
55  
56  
57 175 the non-linear relationships between magnesium intake and all outcomes were  
58  
59 176 evaluated using restricted cubic splines with four knots located at the 5<sup>th</sup>, 35<sup>th</sup>, 65<sup>th</sup>,  
60

1  
2  
3  
4 177 and 95<sup>th</sup> percentiles of the distribution. The P value for curve linearity or non-linearity  
5  
6 178 was calculated by testing the null hypothesis that the coefficient of the second spline  
7  
8  
9 179 is equal to zero. All results were presented using two-stage dose-response model plots  
10  
11 180 (including linear and nonlinear relationships).Some results were demonstrated in  
12  
13  
14 181 forest plots for < 50 mg/day, ≥ 50 and < 100 mg/day, ≥ 100 and < 150 mg/day, ≥ 150  
15  
16  
17 182 mg/day increments.

18  
19 183 Publication bias was assessed graphically by Begg's adjusted rank correlation  
20  
21  
22 184 funnel plots<sup>60</sup> and Egger's linear regression tests<sup>61</sup>. All analyses were performed using  
23  
24  
25 185 Stata version 14.0 (StataCorp, College Station, TX, USA); two-sided  $P < 0.05$  was  
26  
27 186 considered statistically significant except where otherwise specified.

28  
29  
30 187

### 31 32 188 **Patient and Public Involvement:**

33  
34  
35 189 We did not involve patients or the public in this research at any stage.  
36  
37  
38 190

## 39 40 191 **Results**

### 41 42 192 **Study Characteristics and Quality Assessment**

43  
44  
45 193 Of the total 8713 studies, 107 studies were considered for eligibility after screening of  
46  
47  
48 194 titles and abstracts (**Figure 1**). And a total of 41<sup>11-51</sup> prospective cohort studies  
49  
50  
51 195 involving 53 cohorts, 1 912 634 participants and 76 678 cases were eligible for  
52  
53  
54 196 current systematic review and meta-analysis (**Table S2**). Hodge et al<sup>18</sup> only recorded  
55  
56 197 500 mg/day increment of magnesium for further pooled analyses; 2 studies<sup>33,51</sup> failed  
57  
58  
59 198 to clearly distinguish the diabetes type, but the great majority of cases had T2D. We  
60

1  
2  
3  
4 199 computed the subtype data in three studies<sup>14,27,36</sup> after the extraction of total stroke,  
5  
6 200 and we considered ischemic stroke in three other studies<sup>28,30,42</sup> as total stroke given  
7  
8  
9 201 ischemic stroke accounting for nearly 87% of total stroke. Participants were  
10  
11 202 predominately middle-age at baseline, with mean magnesium intake for the highest  
12  
13  
14 203 category of 370 mg/day, mean for the lowest category of 232 mg/day. The mean  
15  
16  
17 204 duration of all eligible studies was 10.7 years. Nineteen studies were conducted in  
18  
19 205 North America (America); 5 studies were in Europe (Sweden, the Netherlands and  
20  
21 206 Britain); 13 studies in Asia (China and Japan and Taipei); 4 studies enrolled  
22  
23  
24 207 individuals in multiple nations. Most of the studies included used food frequency  
25  
26  
27 208 questionnaires (FFQs) or semi-quantitative FFQs (SFFQs) to assess individual dietary  
28  
29  
30 209 intake. Eighteen studies used dietary magnesium intake, and 21 studies recorded total  
31  
32 210 magnesium intake (dietary and supplementary magnesium intake). Of note,  
33  
34  
35 211 supplementary magnesium intake was assessed from the use of magnesium or  
36  
37  
38 212 multivitamin supplements; nevertheless, dietary magnesium accounted for the  
39  
40  
41 213 majority of magnesium intake. Adjusted confounders were mostly similar; however,  
42  
43 214 adjusted dietary confounders such as cereal fiber, potassium, and calcium still varied  
44  
45  
46 215 across individual studies. It was unclear whether included studies had adjusted for  
47  
48  
49 216 sodium because they did not provide the information. All these studies were written in  
50  
51 217 English.  
52  
53 218 After the quality assessments of the studies according to NOS, the average score was  
54  
55  
56 219 8.85 (**Table S3**) and all studies were of high quality (NOS score 8-10).  
57  
58  
59 220

## 221 **Magnesium Intake and T2D Incidence**

222 Thirty-five cohorts from 26 publications<sup>11,12,15,20,22-26,29,31-35,37,39,41,43,48,49,51</sup> (1 219 636  
223 participants and 56 540 T2D cases) reported the magnitude of the risk of T2D was  
224 reduced by 22% (RR, 0.78 [95% CI, 0.75-0.81];  $P < 0.001$ ) comparing the highest  
225 category of magnesium intake to the lowest with a little evidence of heterogeneity ( $I^2$   
226 = 35.6%;  $P = 0.021$ ). The dose category-specific analysis suggested that for  $< 50$   
227 mg/day magnesium increment, the risk of T2D was reduced by 10% (RR, 0.90 [95%  
228 CI, 0.88-0.93];  $P < 0.001$ ); for  $\geq 50$  and  $< 100$  mg/day, the risk was decreased by 16%  
229 (RR, 0.84 [95% CI, 0.82-0.87];  $P < 0.001$ ); for  $\geq 100$  and  $< 150$  mg/day, the risk was  
230 reduced by 22% (RR, 0.78 [95% CI, 0.74-0.83];  $P < 0.001$ ); and for  $\geq 150$  mg/day,  
231 the risk was reduced by 21% (RR, 0.79 [95% CI, 0.74-0.84];  $P < 0.001$ ) (**Figure 2**).  
232 Little evidence of publication bias was found (Egger's test:  $P = 0.088$ ) (**Figure S1A**).

233

## 234 **Magnesium Intake and Stroke Incidence**

235 Eighteen cohorts from 15 publications<sup>13,14,21,27,28,30,36,38,40,42,44-47,50</sup> (692 998  
236 participants and 20 138 total stroke cases) reported the magnitude of the risk of total  
237 stroke was decreased by 11% (RR, 0.89 [95% CI, 0.83-0.94];  $P < 0.001$ ) with no  
238 heterogeneity ( $I^2 = 0\%$ ;  $P = 0.529$ ) in the highest category of magnesium intake VS.  
239 the lowest. Dose category-specific analysis identified no significant association with  
240 the  $< 50$  mg/day,  $\geq 50$  and  $< 100$  mg/day, or  $\geq 100$  and  $< 150$  mg/day of increments.  
241 For the  $\geq 150$  mg/day increment, the risk of total stroke was decreased by 15% (RR,  
242 0.85 [95% CI, 0.79-0.91];  $P < 0.001$ ) (**Figure S2**). Publication bias was evaluated for

1  
2  
3  
4 243 stroke subtypes respectively.  
5

6 244 Fifteen cohorts from 12 publications<sup>14,21,27,28,30,36,38,40,42,45,46,50</sup> reported ischemic  
7  
8  
9 245 stroke. The magnitude of the risk of ischemic stroke was reduced by 12% (RR, 0.88  
10  
11 246 [95% CI, 0.81-0.95];  $P = 0.001$ ) with no significant heterogeneity ( $I^2 = 16.9\%$ ;  $P =$   
12  
13  
14 247 0.265). Dose category-specific analysis identified no significant association with the <  
15  
16  
17 248 50 mg/day,  $\geq 50$  and  $< 100$  mg/day, or  $\geq 100$  and  $< 150$  mg/day increments. A trend  
18  
19  
20 249 to decrease existed but remained insignificant. The original risk was reduced by  
21  
22 250 16% in the analysis of the  $\geq 150$  mg/day increment (RR, 0.84 [95% CI, 0.78-0.91];  $P <$   
23  
24  
25 251 0.001) (**Figure S3**). No publication bias was observed in terms of ischemic stroke  
26  
27 252 (Egger's test:  $P = 0.937$ ) (**Figure S1B**).  
28  
29

30 253 Ten cohorts from 8 studies<sup>14,21,27,36,38,45,46,50</sup> reported that hemorrhagic stroke was  
31  
32  
33 254 not significantly associated with magnesium intake (RR, 0.93 [95% CI, 0.82-1.06];  $P$   
34  
35 255 = 0.282). Dose category-specific analysis identified no significant association (**Figure**  
36  
37  
38 256 **S4**). No significant heterogeneity or publication bias were identified with regard to  
39  
40  
41 257 hemorrhagic stroke (Egger's test:  $P = 0.809$ ) (**Figure S1C**).  
42

43 258 Three publications involving 3 cohorts<sup>14,27,36</sup> showed that high magnesium intake  
44  
45  
46 259 had no significant efficacy in reducing subarachnoid hemorrhage risk (RR, 0.99 [95%  
47  
48 260 CI, 0.71-1.39];  $P = 0.963$ ). Dose category-specific analysis identified no significant  
49  
50  
51 261 association (**Figure S5**).  
52

53 262 With respect to intracerebral hemorrhage, the pooled results from 3 cohorts<sup>14,27,36</sup>  
54  
55  
56 263 in 3 publications revealed no significant advantages of intracerebral hemorrhage (RR,  
57  
58 264 0.92 [95% CI, 0.71-1.20];  $P = 0.540$ ). Dose category-specific analysis identified no  
59  
60

1  
2  
3  
4 265 significant association (**Figure S6**).

5  
6  
7 266

### 8 9 267 **Meta-Regression and Cumulative Meta-Analysis**

10  
11 268 Meta-regression identified no evidence of BMI, sex, participant region and dietary  
12  
13 269 assessment for each individual trial bias in T2D (**Figure S7**), total stroke (**Figure S8**),  
14  
15 270 ischemic stroke (**Figure S9**) and hemorrhagic stroke events (**Figure S10**). The male  
16  
17 271 subgroup ( $P = 0.041$ ) in the sex category might cast little heterogeneity on total stroke;  
18  
19 272 however, the sex category ( $P = 0.112$ ) had no association with total stroke incidence.  
20  
21  
22  
23

24  
25 273 Analyses on T2D (**Figure S11**), total stroke (**Figure S12**) and ischemic stroke  
26  
27 274 demonstrated that the RRs of the final results became robust within a narrow range  
28  
29 275 and remained significant as publication years increased and as recent high quality  
30  
31 276 studies were included. After inclusion of the Iso et al<sup>14</sup> study, the RR and 95% CI for  
32  
33 277 ischemic stroke decreased to less than 1 and became stable (**Figure S13**). Although  
34  
35 278 there was no significantly reduced risk in hemorrhagic stroke, clear evidence showed  
36  
37 279 that the confidence interval was becoming narrow, which had a trend toward  
38  
39 280 significance (**Figure S14**). Thus, risk for hemorrhagic stroke might be reduced, and  
40  
41 281 further studies are still needed.  
42  
43  
44  
45  
46  
47

48 282

### 49 50 283 **Sensitivity Analysis**

51  
52  
53 284 When three<sup>24-26</sup> studies were excluded in T2D analysis, the summary RR changed  
54  
55 285 from 0.78 ([95% CI, 0.75-0.81]) to 0.78 ([95% CI, 0.75-0.82]) with the heterogeneity  
56  
57 286 declining from ( $I^2 = 35.6\%$ ;  $P = 0.021$ ) to ( $I^2 = 24.0\%$ ;  $P = 0.112$ ). Among T2D  
58  
59  
60



1  
2  
3  
4 287 analysis, eight studies<sup>19,22,23,26,33,39,48,49</sup> adjusted for cereal fiber intake yield an RR of  
5  
6 288 0.79 ([95% CI, 0.73-0.85];  $P < 0.001$ ) and two studies<sup>15,35</sup> for calcium yielded an RR  
7  
8  
9 289 of 0.87 ([95% CI, 0.73-1.04];  $P = 0.128$ ). While among total stroke analysis, the  
10  
11 290 summary RR was 0.92 ([95% CI, 0.82-1.02];  $P = 0.097$ ) in five studies<sup>13,44-46,50</sup>  
12  
13  
14 291 adjusted for potassium intake and was 0.89 ([95% CI, 0.80-0.99];  $P = 0.040$ ) in five  
15  
16 292 studies<sup>14,44-46,50</sup> adjusted for calcium. Only one study<sup>15</sup> adjusted for potassium intake  
17  
18  
19 293 in T2D, one study<sup>36</sup> for cereal fiber in total stroke.  
20  
21  
22  
23  
24

294

### 295 **Subgroup Analysis**

296 Stratified analyses by characteristics of the population and study design were  
297 conducted on T2D (**Table 1**), total stroke, ischemic stroke and hemorrhagic stroke  
298 (**Table 2**). The inverse association with T2D remained robust across all subgroups  
299 with little evidence of heterogeneity. As for stroke incidence, a decreased risk of total  
300 stroke and ischemic stroke was found in female participants (RR, 0.91 [95% CI,  
301 0.83-0.99] for total stroke; 0.89 [95% CI, 0.79-1.00] for ischemic stroke) and  
302 individuals with  $\geq 25$  kg/m<sup>2</sup> mean BMI (RR, 0.89 [95% CI, 0.82-0.96] for total stroke;  
303 0.88 [95% CI, 0.81-0.96] for ischemic stroke). When restricted to a  $\geq 12$  y follow-up,  
304 the risk of total stroke and ischemic stroke could be significantly reduced (RR, 0.89  
305 [95% CI, 0.83-0.95] for total stroke; 0.88 [95% CI, 0.81-0.95] for ischemic stroke).  
306 These risks were more reduced in North American and European individuals than  
307 Asians. Cardiovascular events (CV events, coronary heart disease, heart failure, atrial  
308 fibrillation, and self-reported heart disease etc. other than stroke),  
309  
310

1  
2  
3  
4 309 hypercholesterolemia and diabetes would blunt the effect of magnesium on total and  
5  
6 310 ischemic stroke. However, magnesium intake could still, or at least, demonstrate the  
7  
8  
9 311 trend to decrease total and ischemic stroke in individuals even with those risk factors.  
10  
11 312 Similarly, CV events, hypercholesterolemia and family diabetes history had no  
12  
13 313 substantial impact on the inverse association between T2D incidence and magnesium  
14  
15 314 intake. We did not find significantly reduced risk in hemorrhagic stroke across the  
16  
17 315 subgroup analyses.  
18  
19  
20  
21  
22  
23  
24

### 25 317 **Dose-Response Analysis**

26  
27 318 In this part, both linear and nonlinear relationships were found in T2D (**Figure 3A**), in  
28  
29 319 total stroke (**Figure 3B**), and in ischemic stroke (**Figure 3C**). However, no linear or  
30  
31 320 non-linear dose-response relationship was observed in hemorrhagic stroke (**Figure 3D**)  
32  
33 321 along with the subtypes including subarachnoid hemorrhage and intracerebral  
34  
35 322 hemorrhage (**Figure S15**).  
36  
37  
38  
39

40 323 Specifically, we calculated RR for the magnesium increments if there was linear  
41  
42 324 relationship found. The calculated RR was 0.94 ([95% CI, 0.93-0.95]) for the 100  
43  
44 325 mg/day increment for T2D. For total stroke, the summary RR was 0.98 ([95% CI,  
45  
46 326 0.97-0.99]) related to 100 mg/day increment in magnesium intake, RR for ischemic  
47  
48 327 stroke was 0.98 ([95% CI, 0.97-0.99]) related to 100 mg/day increment in magnesium  
49  
50 328 intake. Magnesium intake showed an inverse dose-response relationship with T2D,  
51  
52 329 total stroke and ischemic stroke. Moreover, a more substantial reduction on risks was  
53  
54 330 observed with more magnesium intake.  
55  
56  
57  
58  
59  
60

1  
2  
3  
4 3315  
6 332 **Discussion**

7  
8  
9 333 This paper used a general and up-to-date search strategy to identify some additional  
10  
11 334 studies that were missed in prior meta-analyses under real-world conditions. Our  
12  
13  
14 335 results support a significant inverse association between magnesium consumption and  
15  
16  
17 336 T2D, total stroke and ischemic stroke at the highest level vs. the lowest. No  
18  
19  
20 337 significant association for hemorrhagic stroke, subarachnoid hemorrhage and  
21  
22  
23 338 intracerebral hemorrhage was detected. Female obese participants (mean BMI  $\geq$  25  
24  
25 339 kg/m<sup>2</sup>) with longer follow-up period ( $\geq$  12 y) might obtain a greater benefit from  
26  
27  
28 340 magnesium intake for preventing total and ischemic stroke. Enhancing magnesium  
29  
30  
31 341 intake seemed to be more effective for North American and European individuals to  
32  
33 342 get lower stroke risks. Significant risk reduced by 6%, 2%, and 2% for T2D, total  
34  
35 343 stroke and ischemic stroke respectively at per 100 mg/day increment in magnesium  
36  
37  
38 344 intake level. Overall, the correction of magnesium deficiencies and enhancement of  
39  
40  
41 345 magnesium intake appears to be useful for T2D and total stroke high-risk participants;  
42  
43 346 our study supports the guidelines to address the role of magnesium intake for T2D and  
44  
45  
46 347 stroke early prevention. Even though, we still require more randomized controlled  
47  
48  
49 348 trials (RCTs) in the future to validate the causality.

50  
51 349 Dietary nutrients are hot topics for current clinical medicine, folic acid, vitamin  
52  
53  
54 350 D, and  $\omega$ -3 fatty acids have been specifically recommended to pregnant women,  
55  
56 351 infants and children, and the elderly<sup>62,63</sup>, however, magnesium has been less  
57  
58  
59 352 extensively discussed. This is a noteworthy study for the following reasons. First, this  
60

1  
2  
3  
4 353 study focused on an important and timely topic related to correlations between two  
5  
6 354 chronic diseases and magnesium. Preventing T2D and stroke still requires  
7  
8  
9 355 high-quality evidence. Current study reinforces the possible role of magnesium in the  
10  
11 356 prevention and management of these illnesses and causes new considerations on the  
12  
13  
14 357 avoidance of other chronic disease with potential diet strategy. Second, this  
15  
16  
17 358 comprehensive study with nearly two million individuals and abundant statistical  
18  
19 359 power provides confirming evidence for medical practitioners, health educators and  
20  
21 360 policy makers. Third, until this study, no related paper has discussed such detailed  
22  
23  
24 361 stratified analyses, which helps physicians to amplify the dietary benefits through  
25  
26  
27 362 individualized strategies. Interestingly, we detected North American and European  
28  
29 363 participants seemed to receive more benefits from magnesium intake than Asians.  
30  
31 364 Fourth, to our knowledge, this is the first study in which cumulative meta-analysis  
32  
33 365 was performed to forecast the changing tendency of main risk estimates. Based on  
34  
35 366 past and current cutting edge evidence about nutrition and T2D prevention, the US  
36  
37 367 Diabetes Prevention Program (DPP) conducted a study that demonstrated that proper  
38  
39 368 lifestyle modification (exercise and Mediterranean diet) significantly reduced T2D  
40  
41 369 risks irrespective of population baselines, and the benefit expanded with increased  
42  
43 370 follow-up<sup>64</sup>. The UK national health service (UK NHS) will launch an intervention  
44  
45 371 program including weight loss, nutrition, monitoring and peer support targeting up to  
46  
47 372 10 000 people prone to develop T2D<sup>65</sup>.

48  
49 373 2018 American Diabetes Association (ADA) guidelines<sup>66</sup> recommend to enhance  
50  
51 374 intake of nuts, berries, yogurt, coffee and tea in individuals who are at high risk of  
52  
53  
54  
55  
56  
57  
58  
59  
60

1  
2  
3  
4 375 diabetes. The latest guidelines by the American Heart Association (AHA)/American  
5  
6 376 Stroke Association (ASA)<sup>9</sup> also validate considerable status of early management of  
7  
8  
9 377 stroke (ischemic stroke). In deed, a poor outcome on hemorrhagic stroke was  
10  
11 378 observed in a RCT, however, high serum magnesium might be better for intracerebral  
12  
13  
14 379 hemorrhage prognosis<sup>67</sup>. Most specific nutrients especially macronutrients are  
15  
16  
17 380 correlated with total energy intake. In included free-living human studies, variation of  
18  
19  
20 381 total energy intake is originated from physical activity, differences in body size, and  
21  
22 382 differences in energy efficiency<sup>68</sup>. Thus total energy intake can weaken the  
23  
24  
25 383 investigated association with considerable nutrients intake if this covariable is not  
26  
27  
28 384 properly removed. Epidemiologists should assess reproducibility and validity of  
29  
30 385 energy-adjusted nutrients as well as absolute nutrients intake. Though micronutrient  
31  
32  
33 386 as magnesium is, inverse association could be still found in T2D, total stroke and  
34  
35  
36 387 ischemic stroke outcomes after total energy intake adjustment. As for other nutrients,  
37  
38 388 potassium intake is proposed to lower blood pressure (BP) and improve vascular  
39  
40 389 outcomes (including stroke); dietary potassium may also be influential in glucose  
41  
42  
43 390 control and limiting the risk of diabetes<sup>69</sup>. Vitamin D and calcium may negatively  
44  
45  
46 391 influence glycemia, but the evidence is limited for mostly being based on  
47  
48 392 cross-sectional observational studies<sup>70</sup>. Calcium may be inversely associated with  
49  
50  
51 393 stroke in populations with low to moderate calcium intakes, but no significant  
52  
53  
54 394 association was found between calcium and CVD<sup>71</sup>. All things considered,  
55  
56 395 magnesium-rich food such as nuts (151-567 mg/100g edibles), fruits (132-448  
57  
58 396 mg/100g edibles), vegetables (132-1257 mg/100g edibles), legumes (138-243  
59  
60

1  
2  
3  
4 397 mg/100g edibles), fish (143-303 mg/100g edibles) and total grain (134-306 mg/100g  
5  
6  
7 398 edibles) should be recommended to populations with insufficient magnesium intake  
8  
9 399 from T2D and total stroke.

10  
11 400 This seminar has several differences with previous studies. Dong et al<sup>52</sup> found  
12  
13 401 magnesium intake had an inverse association with T2D incidence (RR, 0.78 [95% CI,  
14  
15 402 0.73-0.84]), and with an intake of 100 mg/day magnesium, the risk was reduced by  
16  
17 403 14%. In fact, they failed to include adequate studies, and standard quality assessments  
18  
19 404 of eligible studies were absent. Individuals from multiple nations in some  
20  
21 405 studies<sup>18,25,26,32</sup> were incorrectly assigned to Asia or the U.S. in the subgroups, and  
22  
23 406 minor imperfections existed in the selection criteria because it was unclear whether  
24  
25 407 they excluded participants with subclinical diabetes. BMI was not a potential modifier  
26  
27 408 for T2D in our study due to the inclusion of more evidence which had longer  
28  
29 409 follow-up period. Fang et al<sup>72</sup> revealed dietary magnesium had a smaller effect on  
30  
31 410 cardiovascular disease but significantly reduced T2D (RR, 0.74 [95% CI, 0.69-0.80])  
32  
33 411 and stroke (RR, 0.88 [95% CI, 0.82-0.95]) risks. The results were comparable, but  
34  
35 412 they just focused on dietary magnesium intake rather than overall magnesium intake  
36  
37 413 (total or dietary), and subtypes of total stroke were missed. To our overall knowledge,  
38  
39 414 BMI, follow-up, family diabetes history, etc. were crucial confounders for evaluating  
40  
41 415 the association, which were not addressed in their study. Moreover, researchers had  
42  
43 416 better investigate the likelihood of linear association in the dose-response pattern  
44  
45 417 (using methods by Greenland and Orsini et al). Fang et al<sup>73</sup> found that the 100 mg/day  
46  
47 418 intake of dietary magnesium was associated with an 8-13% reduction in T2D risk, and  
48  
49  
50  
51  
52  
53  
54  
55  
56  
57  
58  
59  
60

1  
2  
3  
4 419 while a nonlinear relationship did not exist, a minor publication bias was present.  
5  
6 420 Twenty-five studies were eligible; however, some of them focused not on dietary but  
7  
8  
9 421 on total magnesium intake. Moreover, there were two included studies focusing on  
10  
11 422 red meat intake instead of magnesium intake. After excluding actual ineligible studies,  
12  
13  
14 423 we found no evidence of publication bias. Additionally, both linear and nonlinear  
15  
16 424 relationships existed for T2D, because the RRs of the highest category of magnesium  
17  
18 425 intake VS. the lowest in our pooled study were still used. A study by Larsson et  
19  
20  
21 426 al<sup>53</sup>including 7 studies supported a modest but statistically significant inverse  
22  
23 427 association between dietary magnesium intake and stroke. The sample size was quite  
24  
25 428 small, and there was no useful information for stroke subtypes (e.g., ischemic stroke,  
26  
27 429 hemorrhagic stroke) in the main analysis. In our opinion, a well-designed subgroup  
28  
29 430 analysis is a compulsory undertaking, and a pooled stroke result restricted by  
30  
31 431 potassium and calcium adjustment is recommended. The current study found  
32  
33 432 magnesium intake was strongly inversely associated with total stroke and ischemic  
34  
35 433 stroke, which still existed in the dose-response pattern.  
36  
37  
38  
39  
40  
41  
42

43 434 Future studies still have something to be addressed. At first, no significant  
44  
45 435 efficacy was found in hemorrhagic stroke, however, the beneficial trend was observed  
46  
47 436 in the cumulative meta-analysis, which addresses needs for more updated prospective  
48  
49 437 studies and RCTs. Second, there is a key question regarding the optimal time to start  
50  
51 438 prevention and methods to screen severe complications. Cardiovascular events occur  
52  
53 439 in more than 50% and diabetic kidney disease occurs in 20-40% of patients with  
54  
55 440 diabetes. Actually, cardiovascular events increase the risk of death three to four times  
56  
57  
58  
59  
60

1  
2  
3  
4 441 compared with patients without such complications. A sustained period of intensive  
5  
6 442 glucose control early in T2D has been confirmed to reduce complication rates<sup>74</sup>. Most  
7  
8  
9 443 importantly, to the public, educators and guideline makers, boosting magnesium-rich  
10  
11 444 food consumption brings considerable benefits to T2D and total stroke prevention,  
12  
13  
14 445 especially in high-risk populations.  
15  
16

17 446 Several limitations deserve further discussion. First, this group-level  
18  
19 447 meta-analysis is insufficient. Although strong inverse associations for T2D and total  
20  
21 448 stroke were reported, individual-level studies having more detection power are  
22  
23 449 required. Second, several variations cannot be totally understood, for example, we  
24  
25 450 cannot exclude the possibility that other nutrients and/or dietary components  
26  
27 451 correlated with dietary magnesium may have been responsible, either partially or  
28  
29 452 entirely, for the observed associations. Based on eligible studies, we could not  
30  
31 453 quantify the impact of supplementary magnesium (not combined with dietary intake)  
32  
33 454 on T2D and stroke incidence. The real effect of some dietary supplements on T2D or  
34  
35 455 cardiovascular disease seems very interesting to a number of medical experts,  
36  
37 456 clinicians and nutrition educators. Third, FFQs/validated FFQs mostly used in  
38  
39 457 primary studies could not characterize all the nutrients, which misclarified plausible  
40  
41 458 associations. Finally, besides prospective cohort studies, we still required further  
42  
43 459 RCTs, because observational studies might only reach the same conclusion (i.e.,  
44  
45 460 magnesium intake is inversely associated with T2D incidence) but could not prove  
46  
47 461 causality. However, there has been some evidence suggesting that magnesium  
48  
49 462 achieves glucose and insulin metabolism through tyrosine kinase activity of the  
50  
51  
52  
53  
54  
55  
56  
57  
58  
59  
60



1  
2  
3  
4 463 insulin receptor; magnesium also helps to eliminate calcium cation cytotoxicity and  
5  
6 464 has vasodilatory effect<sup>75</sup>.  
7  
8

9 465  
10

## 11 466 **Conclusion**

12  
13  
14 467 Magnesium intake has a substantial inverse association with T2D and total stroke.  
15  
16  
17 468 Among these populations, magnesium consumption can be recommended as an  
18  
19  
20 469 optimization for T2D, total stroke and ischemic stroke primary prevention or early  
21  
22 470 management. In particular, the greater the magnesium intake, the more the risk is  
23  
24  
25 471 reduced. As patients, physicians, policy makers and legislators debate on these issues,  
26  
27 472 such a cost-effective alternative is needed to inform policy decisions and assist reform  
28  
29  
30 473 in global dietary health care.  
31

32 474  
33

34  
35 475 **Acknowledgements:** The authors thank professor Yanhua Tang, MD (The second  
36  
37 476 affiliated hospital of Nanchang University) for her advice and professor Xiaoshu  
38  
39  
40 477 Cheng, MD, PhD (The second affiliated hospital of Nanchang University) for his data  
41  
42  
43 478 collection.  
44

45 479  
46  
47

## 48 480 **Competing interests**

49  
50 481 None declared  
51

52 482  
53  
54

## 55 483 **Provenance and peer review**

56  
57  
58 484 Not commissioned; externally peer reviewed.  
59  
60

1  
2  
3  
4 485

5  
6 486 **Data sharing statement**

7  
8  
9 487 No additional data are available.

10  
11  
12 488

13  
14 489 **Patient consent for publication**

15  
16  
17 490 Not required.

18  
19  
20 491

21  
22 492 **Funding Sources**

23  
24  
25 493 This study was supported by National Natural Science Foundation of China (NSFC),  
26  
27 494 number of grants (81560345), Natural Science Foundation of Jiangxi Province (Grant  
28  
29 495 number: 20161BAB215237).

30  
31  
32 496

33  
34  
35 497 **Author Contribution:** Dr Zhao had full access to all of the data in the manuscript  
36  
37 498 and takes responsibility for the integrity of the data and the accuracy of the data  
38  
39 499 analysis.

40  
41 500 Concept and design: All authors.

42  
43 501 Acquisition, analysis, or interpretation of data: All authors.

44  
45 502 Drafting of the manuscript: Binghao Zhao and Wenxiong Zhang.

46  
47 503 Critical revision of the manuscript for important intellectual content: Binghao Zhao,  
48  
49 504 Lianli Zeng, Jiani Zhao, Qian Wu, Fang Zou, Li Gan and Yifei Dong.

50  
51 505 Statistical analysis: Binghao Zhao.

52  
53 506 Supervision: Wenxiong Zhang and Yiping Wei

54  
55 507

56  
57 508 **Reference**

58  
59  
60 509 1. Centers for Disease Control and Prevention. National Diabetes Statistics Report,

- 1  
2  
3  
4 510 2017. Atlanta, GA: Centers for Disease Control and Prevention, US Department of  
5  
6  
7 511 Health and Human Services; 2017.
- 8  
9 512 2. NCD Risk Factor Collaboration (NCD-RisC). Worldwide trends in diabetes since  
10  
11 513 1980: a pooled analysis of 751 population-based studies with 4.4 million participants.  
12  
13 514 Lancet. 2016;387(10027):1513-1530.
- 14  
15  
16  
17 515 3. Benjamin EJ, Blaha MJ, Chiuve SE, Cushman M, Das SR, Deo R, et al. Heart  
18  
19 516 Disease and Stroke Statistics-2017 Update: A Report From the American Heart  
20  
21 517 Association. Circulation. 2017;135(10):e146-e603.
- 22  
23  
24 518 4. Feigin VL, Forouzanfar MH, Krishnamurthi R, Mensah GA, Connor M, Bennett  
25  
26 519 DA, et al. Global and regional burden of stroke during 1990-2010: findings from the  
27  
28 520 Global Burden of Disease Study 2010. Lancet. 2014;383(9913):245-254.
- 29  
30  
31 521 5. Barbagallo M, Dominguez LJ. Magnesium metabolism in type 2 diabetes mellitus,  
32  
33 522 metabolic syndrome and insulin resistance. Arch Biochem Biophys.  
34  
35 523 2007;458(1):40-47.
- 36  
37  
38 524 6. Zhao L, Zhang F, Ding X, Wu G, Lam YY, Wang X, et al. Gut bacteria  
39  
40 525 selectively promoted by dietary fibers alleviate type 2 diabetes. Science.  
41  
42 526 2018;359(6380):1151-1156.
- 43  
44  
45 527 7. Reffelmann T, Ittermann T, Dörr M, Völzke H, Reinthaler M, Petersmann A, et al.  
46  
47 528 Low serum magnesium concentrations predict cardiovascular and all-cause mortality.  
48  
49 529 Atherosclerosis. 2011;219(1):280-284.
- 50  
51  
52 530 8. Fadelu T, Zhang S, Niedzwiecki D, Ye X, Saltz LB, Mayer RJ, et al. Nut  
53  
54 531 Consumption and Survival in Patients With Stage III Colon Cancer: Results From  
55  
56  
57  
58  
59  
60

- 1  
2  
3  
4 532 CALGB 89803 (Alliance). *J Clin Oncol*. 2018;36(11):1112-1120.  
5  
6  
7 533 9. Powers WJ, Rabinstein AA, Ackerson T, Adeoye OM, Bambakidis NC, Becker K,  
8  
9 534 et al. 2018 Guidelines for the Early Management of Patients With Acute Ischemic  
10  
11 535 Stroke: A Guideline for Healthcare Professionals From the American Heart  
12  
13 536 Association/American Stroke Association. *Stroke*. 2018;49(3):e46-e110.  
14  
15  
16  
17 537 10. Brignole M, Moya A, de Lange FJ, Deharo JC, Elliott PM, Fanciulli A, et al.  
18  
19 538 2018 ESC Guidelines for the diagnosis and management of syncope. *Eur Heart J*.  
20  
21 539 2018:ehy037.  
22  
23  
24  
25 540 11. Salmerón J, Ascherio A, Rimm EB, Colditz GA, Spiegelman D, Jenkins DJ, et al.  
26  
27 541 Dietary Fiber, Glycemic Load, and Risk of NIDDM in Men. *Diabetes care*.  
28  
29 542 1997;20(4):545-550.  
30  
31  
32  
33 543 12. Salmeron J, Manson JE, Stampfer MJ, Colditz GA, Wing AL, Willett WC.  
34  
35 544 Dietary fiber, glycemic load, and risk of non-insulin-dependent diabetes mellitus in  
36  
37 545 women. *JAMA*. 1997;277(6):472-477.  
38  
39  
40  
41 546 13. Ascherio A, Rimm EB, Hernán MA, Giovannucci EL, Kawachi I, Stampfer MJ,  
42  
43 547 et al. Intake of potassium, magnesium, calcium, and fiber and risk of stroke among  
44  
45 548 US men. *Circulation*. 1998;98(12):1198-1204.  
46  
47  
48  
49 549 14. Iso H, Stampfer MJ, Manson JE, Rexrode K, Hennekens CH, Colditz GA, et al.  
50  
51 550 Prospective study of calcium, potassium, and magnesium intake and risk of stroke in  
52  
53 551 women. *Stroke*. 1999;30(9):1772-1779.  
54  
55  
56  
57 552 15. Kao WH, Folsom AR, Nieto FJ, Mo JP, Watson RL, Brancati FL. Serum and  
58  
59 553 dietary magnesium and the risk for type 2 diabetes mellitus: the Atherosclerosis Risk  
60

- 1  
2  
3  
4 554 in Communities Study. *Arch Intern Med.* 1999;159(18):2151-2159.
- 5  
6 555 16. Liu S, Manson JE, Stampfer MJ, Hu FB, Giovannucci E, Colditz GA, et al. A  
7  
8  
9 556 prospective study of whole-grain intake and risk of type 2 diabetes mellitus in US  
10  
11  
12 557 women. *Am J Public Health.* 2000;90(9):1409-1415.
- 13  
14 558 17. Meyer KA, Kushi LH, Jacobs DR, Jr., Slavin J, Sellers TA, Folsom AR.  
15  
16  
17 559 Carbohydrates, dietary fiber, and incident type 2 diabetes in older women. *Am J*  
18  
19  
20 560 *ClinNutr.* 2000;71(4):921-930.
- 21  
22 561 18. Hodge AM, English DR, O'Dea K, Giles GG. Glycemic index and dietary fiber  
23  
24  
25 562 and the risk of type 2 diabetes. *Diabetes care.* 2004;27(11):2701-2706.
- 26  
27 563 19. Lopez-Ridaura R, Willett WC, Rimm EB, Liu S, Stampfer MJ, Manson JE, et al.  
28  
29  
30 564 Magnesium intake and risk of type 2 diabetes in men and women. *Diabetes care.*  
31  
32  
33 565 2004;27(1):134-140.
- 34  
35 566 20. Song Y, Manson JE, Buring JE, Liu S. Dietary magnesium intake in relation to  
36  
37  
38 567 plasma insulin levels and risk of type 2 diabetes in women. *Diabetes care.*  
39  
40  
41 568 2004;27(1):59-65.
- 42  
43 569 21. Song Y, Manson JE, Cook NR, Albert CM, Buring JE, Liu S. Dietary magnesium  
44  
45  
46 570 intake and risk of cardiovascular disease among women. *Am J Cardiol.*  
47  
48  
49 571 2005;96(8):1135-1141.
- 50  
51 572 22. Liu S, Choi HK, Ford E, Song Y, Klevak A, Buring JE, et al. A prospective study  
52  
53  
54 573 of dairy intake and the risk of type 2 diabetes in women. *Diabetes care.*  
55  
56  
57 574 2006;29(7):1579-1584.
- 58  
59 575 23. Pereira MA, Parker ED, Folsom AR. Coffee consumption and risk of type 2  
60

- 1  
2  
3  
4 576 diabetes mellitus: an 11-year prospective study of 28812 postmenopausal women.  
5  
6  
7 577 Arch Intern Med. 2006;166(12):1311-1316.  
8  
9 578 24. Pittas AG, Dawson-Hughes B, Li T, Van Dam RM, Willett WC, Manson JE, et al.  
10  
11 579 Vitamin D and calcium intake in relation to type 2 diabetes in women. Diabetes care.  
12  
13 580 2006;29(3):650-656.  
14  
15  
16 581 25. Van Dam RM, Hu FB, Rosenberg L, Krishnan S, Palmer JR. Dietary calcium and  
17  
18 582 magnesium, major food sources, and risk of type 2 diabetes in U.S. black women.  
19  
20 583 Diabetes care. 2006;29(10):2238-2243.  
21  
22  
23 584 26. Schulze MB, Schulz M, Heidemann C, Schienkiewitz A, Hoffmann K, Boeing H.  
24  
25 585 Fiber and magnesium intake and incidence of type 2 diabetes: a prospective study and  
26  
27 586 meta-analysis. Arch Intern Med. 2007;167(9):956-965.  
28  
29  
30 587 27. Larsson SC, Virtanen MJ, Mars M, Männistö S, Pietinen P, Albanes D, et al.  
31  
32 588 Magnesium, calcium, potassium, and sodium intakes and risk of stroke in male  
33  
34 589 smokers. Arch Intern Med. 2008;168(5):459-465.  
35  
36  
37 590 28. Weng LC, Yeh WT, Bai CH, Chen HJ, Chuang SY, Chang HY, et al. Is ischemic  
38  
39 591 stroke risk related to folate status or other nutrients correlated with folate intake?  
40  
41 592 Stroke. 2008;39(12):3152-3158.  
42  
43  
44 593 29. Kirii K, Mizoue T, Iso H, Takahashi Y, Kato M, Inoue M, et al. Calcium, vitamin  
45  
46 594 D and dairy intake in relation to type 2 diabetes risk in a Japanese cohort.  
47  
48 595 Diabetologia. 2009;52(12):2542-2550.  
49  
50  
51 596 30. Ohira T, Peacock JM, Iso H, Chambless LE, Rosamond WD, Folsom AR. Serum  
52  
53 597 and Dietary Magnesium and Risk of Ischemic Stroke: The Atherosclerosis Risk in  
54  
55  
56  
57  
58  
59  
60

- 1  
2  
3  
4 598 Communities Study. *Am J Epidemiol.* 2009;169(12):1437-1444.  
5  
6  
7 599 31. Villegas R, Gao YT, Dai Q, Yang G, Cai H, Li H, et al. Dietary calcium and  
8  
9 600 magnesium intakes and the risk of type 2 diabetes: the Shanghai Women's Health  
10  
11 601 Study. *Am J Clin Nutr.* 2009;89(4):1059-1067.  
12  
13  
14 602 32. Hopping BN, Erber E, Grandinetti A, Verheus M, Kolonel LN, Maskarinec G.  
15  
16 603 Dietary fiber, magnesium, and glycemic load alter risk of type 2 diabetes in a  
17  
18 604 multiethnic cohort in hawaii. *J Nutr.* 2010;140(1):68-74.  
19  
20  
21  
22 605 33. Kim DJ, Xun P, Liu K, Loria C, Yokota K, Jacobs DR Jr, et al. Magnesium  
23  
24 606 Intake in Relation to Systemic Inflammation, Insulin Resistance, and the Incidence of  
25  
26 607 Diabetes. *Diabetes care.* 2010;33(12):2604-2610.  
27  
28  
29  
30 608 34. Kirii K, Iso H, Date C, Fukui M, Tamakoshi A, JACC Study Group. Magnesium  
31  
32 609 intake and risk of self-reported type 2 diabetes among Japanese. *J Am Coll Nutr.*  
33  
34 610 2010;29(2):99-106.  
35  
36  
37  
38 611 35. Nanri A, Mizoue T, Noda M, Takahashi Y, Kirii K, Inoue M, et al. Magnesium  
39  
40 612 intake and type II diabetes in Japanese men and women: the Japan Public Health  
41  
42 613 Center-based Prospective Study. *Eur J Clin Nutr.* 2010;64(10):1244-1247.  
43  
44  
45 614 36. Larsson SC, Virtamo J, Wolk A. Potassium, calcium, and magnesium intakes and  
46  
47 615 risk of stroke in women. *Am J Epidemiol.* 2011;174(1):35-43.  
48  
49  
50  
51 616 37. Weng LC, Lee NJ, Yeh WT, Ho LT, Pan WH. Lower intake of magnesium and  
52  
53 617 dietary fiber increases the incidence of type 2 diabetes in Taiwanese. *J Formos Med*  
54  
55 618 *Assoc.* 2012;111(11):651-659.  
56  
57  
58 619 38. Zhang W, Iso H, Ohira T, Date C, Tamakoshi A, JACC Study Group.  
59  
60

- 1  
2  
3  
4 620 Associations of dietary magnesium intake with mortality from cardiovascular disease:  
5  
6  
7 621 the JACC study. *Atherosclerosis*. 2012;221(2):587-595.
- 8  
9 622 39. Hata A, Doi Y, Ninomiya T, Mukai N, Hirakawa Y, Hata J, et al. Magnesium  
10  
11 623 intake decreases Type 2 diabetes risk through the improvement of insulin resistance  
12  
13  
14 624 and inflammation: the Hisayama Study. *Diabet Med*. 2013;30(12):1487-1494.
- 15  
16  
17 625 40. Lin PH, Yeh WT, Svetkey LP, Chuang SY, Chang YC, Wang C, et al. Dietary  
18  
19 626 intakes consistent with the DASH dietary pattern reduce blood pressure increase with  
20  
21  
22 627 age and risk for stroke in a Chinese population. *Asia Pac J Clin Nutr*.  
23  
24  
25 628 2013;22(3):482-491.
- 26  
27 629 41. Oba S, Nanri A, Kurotani K, Goto A, Kato M, Mizoue T, et al. Dietary glycemic  
28  
29  
30 630 index, glycemic load and incidence of type 2 diabetes in Japanese men and women:  
31  
32  
33 631 the Japan Public Health Center-based Prospective Study. *Nutr J*. 2013;12(1):165.
- 34  
35 632 42. Sluijs I, Czernichow S, Beulens JWW. Dietary electrolytes and risk of ischemic  
36  
37  
38 633 stroke. *Eur J Prev Cardiol*. 2013;20(1):S76.
- 39  
40 634 43. Hruby A, Meigs JB, O'Donnell CJ, Jacques PF, Mckeown NM. Higher  
41  
42  
43 635 Magnesium Intake Reduces Risk of Impaired Glucose and Insulin Metabolism and  
44  
45  
46 636 Progression From Prediabetes to Diabetes in Middle-Aged Americans. *Am J Dis*  
47  
48  
49 637 *Child*. 2014;37(2):419-427.
- 50  
51 638 44. Sluijs I, Czernichow S, Beulens JW, Boer JM, van der Schouw YT, Verschuren  
52  
53  
54 639 WM, et al. Intakes of potassium, magnesium, and calcium and risk of stroke. *Stroke*.  
55  
56  
57 640 2014;45(4):1148-1150.
- 58  
59 641 45. Adebamowo SN, Spiegelman D, Flint AJ, Willett WC, Rexrode KM. Intakes of  
60



- 1  
2  
3  
4 642 magnesium, potassium, and calcium and the risk of stroke among men. *Int J Stroke*.  
5  
6 643 2015;10(7):1093-1100.  
7  
8  
9 644 46. Adebamowo SN, Spiegelman D, Willett WC, Rexrode KM. Association between  
10  
11 645 intakes of magnesium, potassium, and calcium and risk of stroke: 2 cohorts of US  
12  
13 646 women and updated meta-analyses. *Am J Clin Nutr*. 2015;101(6):1269-1277.  
14  
15  
16 647 47. Bain LK, Myint PK, Jennings A, Lentjes MA, Luben RN, Khaw KT, et al. The  
17  
18 648 relationship between dietary magnesium intake, stroke and its major risk factors,  
19  
20 649 blood pressure and cholesterol, in the EPIC-Norfolk cohort. *Int J Cardiol*.  
21  
22 650 2015;196:108-114.  
23  
24  
25 651 48. Huang Y-C, Wahlqvist ML, Kao M-D, Wang J-L, Lee M-S. Optimal Dietary and  
26  
27 652 Plasma Magnesium Statuses Depend on Dietary Quality for a Reduction in the Risk of  
28  
29 653 All-Cause Mortality in Older Adults. *Nutrients*. 2015;7(7):5664-5683.  
30  
31  
32 654 49. Hruby A, Guasch-Ferré M, Bhupathiraju SN, Manson JE, Willett WC, McKeown  
33  
34 655 NM, et al. Magnesium Intake, Quality of Carbohydrates, and Risk of Type 2 Diabetes:  
35  
36 656 Results From Three U.S. Cohorts. *Diabetes care*. 2017;40(12):1695-1702.  
37  
38  
39 657 50. Kokubo Y, Saito I, Iso H, Yamagishi K, Yatsuya H, Ishihara J, et al. Dietary  
40  
41 658 magnesium intake and risk of incident coronary heart disease in men: A prospective  
42  
43 659 cohort study. *Clin Nutr*. 2018;37(5):1602-1608.  
44  
45  
46 660 51. Konishi K, Wada K, Tamura T, Tsuji M, Kawachi T, Nagata C. Dietary  
47  
48 661 magnesium intake and the risk of diabetes in the Japanese community: results from  
49  
50 662 the Takayama study. *Eur J Nutr*. 2017;56(2):767-774.  
51  
52  
53 663 52. Dong JY, Xun P, He K, Qin LQ. Magnesium intake and risk of type 2 diabetes:  
54  
55  
56  
57  
58  
59  
60

- 1  
2  
3  
4 664 meta-analysis of prospective cohort studies. *Diabetes care*. 2011;34(9):2116-2122.  
5  
6 665 53. Larsson SC, Orsini N, Wolk A. Dietary magnesium intake and risk of stroke: a  
7  
8 666 meta-analysis of prospective studies. *Am J Clin Nutr*. 2012;95(2):362-366.  
9  
10  
11 667 54. Adams HP Jr, Bendixen BH, Kappelle LJ, Biller J, Love BB, Gordon DL, et al.  
12  
13 668 Classification of subtype of acute ischemic stroke. Definitions for use in a multicenter  
14  
15 669 clinical trial. TOAST. Trial of Org 10172 in Acute Stroke Treatment. *Stroke*.  
16  
17 670 1993;24(1):35-41.  
18  
19 671 55. Rannikmäe K, Woodfield R, Anderson CS, Charidimou A, Chiewvit P,  
20  
21 672 Greenberg SM, et al. Reliability of intracerebral hemorrhage classification systems: A  
22  
23 673 systematic review. *Int J Stroke*. 2016;11(6):626-636.  
24  
25 674 56. GA Wells, B Shea, D O'Connell, J Peterson, V Welch, M Losos. The  
26  
27 675 Newcastle–Ottawa Scale (NOS) for Assessing the Quality of Non-Randomized  
28  
29 676 Studies in Meta-Analysis. *Appl Eng Agric*. 2014;18(6): 727-734.  
30  
31 677 57. Higgins JP, Thompson SG, Deeks JJ, Altman DG. Measuring inconsistency in  
32  
33 678 meta-analyses. *BMJ*. 2003;327(7414):557-560.  
34  
35 679 58. Greenland S, Longnecker MP. Methods for trend estimation from summarized  
36  
37 680 dose-response data, with applications to meta-analysis. *Am J Epidemiol*.  
38  
39 681 1992;135(11):1301-1309.  
40  
41 682 59. Orsini N, Bellocco R, Greenland S. Generalized least squares for trend estimation  
42  
43 683 of summarized dose–response data. *Stata J*. 2006;6(6):40-57.  
44  
45 684 60. Begg CB, Mazumdar M. Operating characteristics of a rank correlation test for  
46  
47 685 publication bias. *Biometrics*. 1994;50(4):1088-1101.  
48  
49  
50  
51  
52  
53  
54  
55  
56  
57  
58  
59  
60

- 1  
2  
3  
4 686 61. Egger M, Davey Smith G, Schneider M, Minder C. Bias in meta-analysis detected  
5  
6  
7 687 by a simple, graphical test. *BMJ*. 1997;315(7109):629-634.  
8  
9 688 62. Manson JE, Bassuk SS. Vitamin and mineral supplements: What clinicians need  
10  
11  
12 689 to know. *JAMA*. 2018;319(9):859-860.  
13  
14 690 63. Papanicolaos I, Woskie LR, Jha AK. Health Care Spending in the United States and  
15  
16  
17 691 Other High-Income Countries. *JAMA*. 2018;319(10):1024-1039.  
18  
19  
20 692 64. Group DPP, Temprosa M. Long-term effects of lifestyle intervention or  
21  
22  
23 693 metformin on diabetes development and microvascular complications over 15-year  
24  
25 694 follow-up: the Diabetes Prevention Program Outcomes Study. *Lancet Diabetes*  
26  
27 695 *Endocrinol*. 2015;3(11):866-875.  
28  
29  
30 696 65. Maruthappu M, Sood H, Keogh B. Radically upgrading diabetes prevention in  
31  
32  
33 697 England. *Lancet Diabetes Endocrinol*. 2015;3(5):312-313.  
34  
35  
36 698 66. American Diabetes Association. Prevention or Delay of Type 2 Diabetes:  
37  
38 699 Standards of Medical Care in Diabetes-2018. *Diabetes care*. 2018;41(1):S51-S54.  
39  
40  
41 700 67. Goyal N, Tsivgoulis G, Malhotra K, Houck AL, Khorchid YM, Pandhi A, et al.  
42  
43 701 Serum Magnesium Levels and Outcomes in Patients With Acute Spontaneous  
44  
45  
46 702 Intracerebral Hemorrhage. *J Am Heart Assoc*. 2018;7(8): e008698.  
47  
48  
49 703 68. Willett WC, Howe GR, Kushi LH. Adjustment for total energy intake in  
50  
51 704 epidemiologic studies. *Am J Clin Nutr*. 1997;65(4):1220S-1228S; discussion  
52  
53 705 1229S-1231S.  
54  
55  
56 706 69. Stone MS, Martyn L, Weaver CM. Potassium Intake, Bioavailability,  
57  
58  
59 707 Hypertension, and Glucose Control. *Nutrients*. 2016;8(7): E444.  
60

- 1  
2  
3  
4 708 70. Pittas AG, Lau J, Hu FB, Dawson-Hughes B. The role of vitamin D and calcium  
5  
6 709 in type 2 diabetes. A systematic review and meta-analysis. *J Clin Endocrinol Metab.*  
7  
8  
9 710 2007;92(6): 2017-2029.  
10  
11 711 71. Larsson SC, Orsini N, Wolk A. Dietary calcium intake and risk of stroke: a  
12  
13  
14 712 dose-response meta-analysis. *Am J Clin Nutr.*2013;97(5): 951-957.  
15  
16  
17 713 72. Fang X, Wang K, Han D, He X, Wei J, Zhao L, et al. Dietary magnesium intake  
18  
19 714 and the risk of cardiovascular disease, type 2 diabetes, and all-cause mortality: a  
20  
21  
22 715 dose-response meta-analysis of prospective cohort studies. *BMC Med.*  
23  
24 716 2016;14(1):210.  
25  
26  
27 717 73. Fang X, Han H, Li M, Liang C, Fan Z, Aaseth J, et al. Dose-Response  
28  
29 718 Relationship between Dietary Magnesium Intake and Risk of Type 2 Diabetes  
30  
31  
32 719 Mellitus: A Systematic Review and Meta-Regression Analysis of Prospective Cohort  
33  
34 720 Studies. *Nutrients.* 2016;8(11):739.  
35  
36  
37 721 74. Riddle MC, Ambrosius WT, Brillon DJ, Buse JB, Byington RP, Cohen RM, et al.  
38  
39 722 Epidemiologic Relationships Between A1C and All-Cause Mortality During a Median  
40  
41  
42 723 3.4-Year Follow-up of Glycemic Treatment in the ACCORD Trial. *Diabetes care.*  
43  
44 724 2010;33(5):983-990.  
45  
46  
47 725 75. Guerrero-Romero F, Simental-Mendía LE, Hernández-Ronquillo G,  
48  
49 726 Rodríguez-Morán M. Oral magnesium supplementation improves glycaemic status in  
50  
51  
52 727 subjects with prediabetes and hypomagnesaemia: A double-blind placebo-controlled  
53  
54  
55 728 randomized trial. *Diabetes & Metabolism.* 2015;41(3):202  
56  
57  
58  
59  
60

**Table 1** Subgroup Analysis relating to Magnesium Intake and Type 2 Diabetes (T2D)

| Group                                                                | T2D            |                  |          |                     |           |                   |
|----------------------------------------------------------------------|----------------|------------------|----------|---------------------|-----------|-------------------|
|                                                                      | No. of studies | RR (95% CI)      | $P_{ES}$ | $P_{heterogeneity}$ | $I^2$ (%) | $P_{interaction}$ |
| Total                                                                | 26             | 0.78 (0.75-0.81) | < 0.001  | 0.021               | 35.6      | NA                |
| <b>Participants region</b>                                           | 26             |                  |          |                     |           | 0.905             |
| North America                                                        | 13             | 0.77 (0.73-0.82) | < 0.001  | 0.048               | 39.5      |                   |
| Europe                                                               | 0              | NA               | NA       | NA                  | NA        |                   |
| Asia                                                                 | 9              | 0.78 (0.71-0.87) | < 0.001  | 0.165               | 21.7      |                   |
| Multiple nations                                                     | 4              | 0.79 (0.71-0.88) | < 0.001  | 0.048               | 58.3      |                   |
| <b>Sex<sup>a</sup></b>                                               | 34             |                  |          |                     |           | 0.284             |
| Male                                                                 | 9              | 0.81 (0.76-0.87) | < 0.001  | 0.337               | 11.7      |                   |
| Female                                                               | 17             | 0.77 (0.73-0.81) | < 0.001  | 0.055               | 37.5      |                   |
| Both <sup>b</sup>                                                    | 8              | 0.70 (0.57-0.85) | < 0.001  | 0.067               | 45.3      |                   |
| <b>BMI (kg/m<sup>2</sup>)</b>                                        | 26             |                  |          |                     |           | 0.716             |
| ≥ 25                                                                 | 12             | 0.75 (0.69-0.81) | < 0.001  | 0.135               | 31        |                   |
| < 25                                                                 | 11             | 0.78 (0.74-0.83) | < 0.001  | 0.022               | 45.4      |                   |
| Unknown                                                              | 3              | 0.81 (0.76-0.86) | < 0.001  | 0.586               | 0         |                   |
| <b>Follow-up duration (y)</b>                                        | 26             |                  |          |                     |           | 0.150             |
| ≥ 10                                                                 | 12             | 0.80 (0.76-0.84) | < 0.001  | 0.047               | 38.8      |                   |
| < 10                                                                 | 14             | 0.74 (0.68-0.80) | < 0.001  | 0.164               | 25.2      |                   |
| <b>Dietary assessment</b>                                            | 26             |                  |          |                     |           | 0.281             |
| FFQ/validated FFQ                                                    | 15             | 0.77 (0.73-0.82) | < 0.001  | 0.159               | 23.7      |                   |
| SFFQ/validated SFFQ                                                  | 9              | 0.79 (0.74-0.84) | < 0.001  | 0.017               | 52.5      |                   |
| Other                                                                | 2              | 0.55 (0.36-0.83) | 0.005    | 0.826               | 0         |                   |
| <b>Magnesium intake type<sup>c</sup></b>                             | 28             |                  |          |                     |           | 0.335             |
| Total magnesium intake <sup>d</sup>                                  | 15             | 0.79 (0.75-0.84) | < 0.001  | 0.035               | 39.8      |                   |
| Dietary magnesium intake                                             | 13             | 0.77 (0.72-0.82) | < 0.001  | 0.166               | 25.0      |                   |
| <b>Total energy adjustment</b>                                       | 26             |                  |          |                     |           | 0.396             |
| Yes                                                                  | 17             | 0.79 (0.74-0.84) | < 0.001  | 0.027               | 40.4      |                   |
| No                                                                   | 9              | 0.76 (0.72-0.81) | < 0.001  | 0.225               | 21.6      |                   |
| <b>Difference between top and bottom intake (mg/day)<sup>e</sup></b> | 27             |                  |          |                     |           | 0.671             |
| ≥ 140                                                                | 13             | 0.78 (0.74-0.83) | < 0.001  | 0.020               | 45.3      |                   |
| < 140                                                                | 14             | 0.77 (0.72-0.82) | < 0.001  | 0.209               | 21.0      |                   |
| <b>Current CV events status<sup>f</sup></b>                          | 26             |                  |          |                     |           | 0.536             |
| Yes                                                                  | 13             | 0.79 (0.74-0.83) | < 0.001  | 0.049               | 37.9      |                   |
| Unknown                                                              | 13             | 0.77 (0.71-0.82) | < 0.001  | 0.082               | 35.1      |                   |
| <b>Hypercholesterolemia status<sup>g</sup></b>                       | 26             |                  |          |                     |           | 0.625             |
| Yes                                                                  | 5              | 0.79 (0.73-0.85) | < 0.001  | 0.021               | 57.5      |                   |
| Unknown                                                              | 21             | 0.77 (0.73-0.82) | < 0.001  | 0.096               | 27.3      |                   |
| <b>Family diabetes history</b>                                       | 26             |                  |          |                     |           | 0.168             |
| Yes                                                                  | 17             | 0.76 (0.72-0.80) | < 0.001  | 0.021               | 41.8      |                   |
| Unknown                                                              | 9              | 0.81 (0.76-0.87) | < 0.001  | 0.258               | 14.3      |                   |

**Abbreviation:** T2D, type 2 diabetes; BMI, body mass index; FFQ, food frequency questionnaire; SFFQ, semi-quantitative food frequent questionnaire; RR, relative risk; ES, effect size; CV events, cardiovascular events.

<sup>a</sup>, Male and female of T2D outcome were treated as independent cohorts within eight studies;

<sup>b</sup>, Male and female participants were in independent cohorts;

735 <sup>c</sup>, Two studies reported total magnesium and dietary magnesium intake outcome;

736 <sup>d</sup>, Total magnesium intake (milligrams per day) included the total amount of magnesium from both food (diet) and supplement;

737 <sup>e</sup>, Subtract the lowest category intake from the highest. Oba et al (M) was in < 140 group, while Oba et al (F) was in ≥ 140 group;

738 <sup>f</sup>, Grouped by whether participants with or without CV events. CV events in this part include coronary heart disease, heart failure,  
739 stroke, atrial fibrillation, and self-reported heart disease etc;

740 <sup>g</sup>, Grouped by whether participants with or without hypercholesterolemia. Hypercholesterolemia in this part means cholesterol  
741 concentration ≥ 240 mg/dL.

For peer review only

742 **Table 2.** Subgroup Analyses Relating to Magnesium Intake and Total Stroke, Ischemic Stroke, Hemorrhagic stroke.  
1

| Group                               | Total Stroke  |                     |                    |                          | Ischemic Stroke |                     |                    |                          | Hemorrhagic stroke |                  |                    |                          |
|-------------------------------------|---------------|---------------------|--------------------|--------------------------|-----------------|---------------------|--------------------|--------------------------|--------------------|------------------|--------------------|--------------------------|
|                                     | No.of studies | RR (95% CI)         | I <sup>2</sup> (%) | P <sub>interaction</sub> | No.of studies   | RR (95% CI)         | I <sup>2</sup> (%) | P <sub>interaction</sub> | No.of studies      | RR (95% CI)      | I <sup>2</sup> (%) | P <sub>interaction</sub> |
| Total                               | 15            | 0.89<br>(0.83-0.94) | 0.00               | NA                       | 12              | 0.88<br>(0.81-0.95) | 16.90              | NA                       | 8                  | 0.93 (0.82-1.06) | 0.461              | NA                       |
| <b>Participants region</b>          | 15            |                     |                    | 0.733                    | 12              |                     |                    | 0.584                    | 8                  |                  |                    | 0.873                    |
| North America                       | 6             | 0.87<br>(0.79-0.96) | 0.00               |                          | 5               | 0.85<br>(0.76-0.95) | 0.00               |                          | 4                  | 0.90 (0.71-1.15) | 0.00               |                          |
| Europe                              | 5             | 0.87<br>(0.77-0.98) | 14.80              |                          | 3               | 0.86<br>(0.78-0.95) | 0.00               |                          | 2                  | 0.99 (0.79-1.25) | 0.00               |                          |
| Asia                                | 4             | 0.90<br>(0.78-1.05) | 32.80              |                          | 4               | 0.93<br>(0.75-1.14) | 45.50              |                          | 2                  | 0.89 (0.66-1.21) | 53.40              |                          |
| Multiple nations                    | 0             | NA                  | NA                 |                          | 0               | NA                  | NA                 |                          | 0                  | NA               | NA                 |                          |
| <b>Sex<sup>a</sup></b>              | 18            |                     |                    | 0.031                    | 14              |                     |                    | 0.134                    | 10                 |                  |                    | 0.425                    |
| Male                                | 6             | 0.95(0.86-1.05)     | 0.00               |                          | 4               | 0.99<br>(0.82-1.19) | 52.80              |                          | 4                  | 0.97 (0.75-1.26) | 35.50              |                          |
| Female                              | 7             | 0.91<br>(0.83-0.99) | 0.00               |                          | 6               | 0.89<br>(0.79-1.00) | 0.00               |                          | 6                  | 0.88 (0.74-1.06) | 0.00               |                          |
| Both <sup>b</sup>                   | 5             | 0.74<br>(0.64-0.85) | 0.00               |                          | 4               | 0.76<br>(0.65-0.88) | 0.00               |                          | 0                  | NA               | NA                 |                          |
| <b>Mean BMI (kg/m<sup>2</sup>)</b>  | 15            |                     |                    | 0.606                    | 12              |                     |                    | 0.631                    | 8                  |                  |                    | 0.418                    |
| ≥ 25                                | 8             | 0.89<br>(0.82-0.96) | 0.00               |                          | 6               | 0.88<br>(0.81-0.96) | 0.00               |                          | 5                  | 0.97 (0.81-1.17) | 0.00               |                          |
| < 25                                | 5             | 0.89<br>(0.78-1.01) | 30.00              |                          | 5               | 0.87<br>(0.73-1.03) | 44.00              |                          | 3                  | 0.88 (0.69-1.12) | 39.30              |                          |
| Unknown                             | 2             | 0.80<br>(0.63-1.02) | 0.00               |                          | 1               | 0.76<br>(0.57-1.07) | NA                 |                          | 0                  | NA               | NA                 |                          |
| <b>Follow-up duration (y)</b>       | 15            |                     |                    | 0.798                    | 12              |                     |                    | 0.811                    | 8                  |                  |                    | 0.808                    |
| ≥ 12                                | 11            | 0.88<br>(0.82-0.94) | 5.30               |                          | 10              | 0.87<br>(0.80-0.95) | 19.10              |                          | 7                  | 0.93 (0.81-1.08) | 7.70               |                          |
| < 12                                | 4             | 0.90<br>(0.77-1.05) | 0.00               |                          | 2               | 0.86<br>(0.62-1.20) | 48.40              |                          | 1                  | 0.88 (0.57-1.36) | NA                 |                          |
| <b>Dietary assessment</b>           | 15            |                     |                    | 0.578                    | 12              |                     |                    | NA                       | 8                  |                  |                    | NA                       |
| FFQ/validated FFQ                   | 14            | 0.89<br>(0.83-0.95) | 3.80               |                          | 12              | 0.88<br>(0.81-0.95) | 16.90              |                          | 8                  | 0.93 (0.82-1.06) | 0.00               |                          |
| SFFQ/validated SFFQ                 | 0             | NA                  | NA                 |                          | 0               | NA                  | NA                 |                          | 0                  | NA               | NA                 |                          |
| Other                               | 1             | 0.81<br>(0.61-1.09) | 0.00               |                          | 0               | NA                  | NA                 |                          | 0                  | NA               | NA                 |                          |
| <b>Magnesium intake type</b>        | 15            |                     |                    | 0.865                    | 12              |                     |                    | 0.831                    | 8                  |                  |                    | 0.831                    |
| Total magnesium intake <sup>c</sup> | 8             | 0.89<br>(0.82-0.96) | 0.00               |                          | 6               | 0.87<br>(0.80-0.94) | 0.00               |                          | 5                  | 0.94 (0.79-1.12) | 0.00               |                          |
| Dietary magnesium                   |               | 0.88                | 0.44               |                          |                 | 0.89                | 35.40              |                          |                    | 0.91 (0.70-1.18) | 39.40              |                          |

|    |                                                                      |    |             |       |    |             |       |   |                  |       |
|----|----------------------------------------------------------------------|----|-------------|-------|----|-------------|-------|---|------------------|-------|
| 1  | intake                                                               | 7  | (0.81-0.96) |       | 6  | (0.77-1.03) |       | 3 |                  |       |
| 2  | <b>Total energy adjustment</b>                                       | 15 |             | 0.888 | 12 |             | 0.689 | 8 |                  | 0.538 |
| 3  |                                                                      |    | 0.87        |       |    | 0.86        |       |   |                  |       |
| 4  | Yes                                                                  | 5  | (0.77-0.99) | 27.00 | 2  | (0.78-0.94) | 0.00  | 2 | 0.93 (0.82-1.06) | 0.00  |
| 5  | No                                                                   | 10 | 0.89        | 0.00  | 10 | 0.88        | 26.60 | 6 | 0.90 (0.76-1.07) | 11.40 |
| 6  | <b>Difference between top and bottom intake (mg/day)<sup>d</sup></b> |    | (0.83-0.96) |       |    | (0.79-0.99) |       |   |                  |       |
| 7  |                                                                      | 15 |             | 0.107 | 12 |             | 0.180 | 8 |                  | 0.244 |
| 8  |                                                                      |    |             |       |    |             |       |   |                  |       |
| 9  | ≥ 180                                                                | 7  | 0.83        | 0.00  | 5  | 0.83        | 0.00  | 6 | 1.07 (0.83-1.37) | 0.00  |
| 10 |                                                                      |    | (0.76-0.91) |       |    | (0.76-0.91) |       |   |                  |       |
| 11 | < 180                                                                | 8  | 0.93        | 0.00  | 7  | 0.92        | 26.20 | 2 | 0.89 (0.76-1.03) | 0.00  |
| 12 |                                                                      |    | (0.86-1.00) |       |    | (0.81-1.03) |       |   |                  |       |
| 13 | <b>Current CV events status<sup>e</sup></b>                          | 15 |             | 0.074 | 12 |             | 0.393 | 8 |                  | NA    |
| 14 |                                                                      |    |             |       |    |             |       |   |                  |       |
| 15 | Yes                                                                  | 12 | 0.90        | 0.00  | 11 | 0.88        | 18.20 | 8 | 0.93 (0.82-1.06) | 0.00  |
| 16 |                                                                      |    | (0.85-0.96) |       |    | (0.81-0.96) |       |   |                  |       |
| 17 | Unknown                                                              | 3  | 0.75        | 0.00  | 1  | 0.76        | NA    | 0 | NA               | NA    |
| 18 |                                                                      |    | (0.63-0.90) |       |    | (0.57-1.01) |       |   |                  |       |
| 19 | <b>Hypercholesterolemia status<sup>f</sup></b>                       | 15 |             | 0.480 | 12 |             | 0.565 | 8 |                  | 0.651 |
| 20 |                                                                      |    |             |       |    |             |       |   |                  |       |
| 21 | Yes                                                                  | 7  | 0.91        | 0.00  | 6  | 0.90        | 6.90  | 5 | 0.90 (0.76-1.08) | 0.00  |
| 22 |                                                                      |    | (0.83-0.99) |       |    | (0.80-1.01) |       |   |                  |       |
| 23 | Unknown                                                              | 8  | 0.86        | 13.10 | 6  | 0.86        | 32.40 | 3 | 0.94 (0.72-1.22) | 40.30 |
| 24 |                                                                      |    | (0.79-0.95) |       |    | (0.77-0.97) |       |   |                  |       |
| 25 | <b>Current diabetes status<sup>g</sup></b>                           | 15 |             | 0.039 | 12 |             | 0.159 | 8 |                  | NA    |
| 26 |                                                                      |    |             |       |    |             |       |   |                  |       |
| 27 | Yes                                                                  | 10 | 0.91        | 0.00  | 10 | 0.89        | 13.50 | 8 | 0.93 (0.82-1.06) | 0.00  |
| 28 |                                                                      |    | (0.82-0.97) |       |    | (0.82-0.97) |       |   |                  |       |
| 29 | Unknown                                                              | 5  | 0.75        | 0.00  | 2  | 0.72        | 0.00  | 0 | NA               | NA    |
| 30 |                                                                      |    | (0.64-0.88) |       |    | (0.56-0.92) |       |   |                  |       |

**Abbreviation:** BMI, body mass index; FFQ, food frequency questionnaire; SFFQ, semi-quantitative food frequency questionnaire; CV events, cardiovascular events; RR, relative risk; NA, not available.

<sup>a</sup>, several studies reported stroke outcome of male and female participants in different cohorts;

<sup>b</sup>, male and female participants were in the same cohort;

<sup>c</sup>, total magnesium intake (milligrams per day) included the total amount of magnesium from both food (diet) and supplements;

<sup>d</sup>, subtract the lowest category intake from the highest;

<sup>e</sup>, grouped by whether participants with or without CV events. CV events in this part include coronary heart disease, heart failure, atrial fibrillation, and self-reported heart disease etc., stroke is not included;

<sup>f</sup>, grouped by whether participants with or without hypercholesterolemia. Hypercholesterolemia in this part means cholesterol concentration  $\geq 240$  mg/dL;

<sup>g</sup>, grouped by whether participants with or without diabetes.



1  
2  
3 744 **Figure Legends**  
4

5 745 **Figure 1.** Flow Chart for Literature Search and Screening Process  
6

7 746 **Figure 2.** Forest Plots for Risk of Type 2 Diabetes (T2D) for Magnesium Intake (A)  
8 and for < 50 mg/day (B),  $\geq 50$  and < 100 mg/day (C),  $\geq 100$  and < 150 mg/day (D) and  
9  
10 747  
11  
12 748  $\geq 150$  mg/day Magnesium increments (E).  
13

14 749 **Figure 3.** Two-Stage Dose-Response Effect on the Relationships between Magnesium  
15 Intake and Type 2 Diabetes (T2D) (A), Total Stroke (B), Ischemic Stroke (C) and  
16  
17 750  
18  
19 751 Hemorrhagic Stroke (D).  
20  
21  
22  
23  
24  
25  
26  
27  
28  
29  
30  
31  
32  
33  
34  
35  
36  
37  
38  
39  
40  
41  
42  
43  
44  
45  
46  
47  
48  
49  
50  
51  
52  
53  
54  
55  
56  
57  
58  
59  
60

1  
2  
3 752 **Supplementary material online:**  
4

5 753 **Table S1.** PRISMA 2009 Checklist  
6

7 754 **Table S2.** Summary of Baseline Characteristics of Included Studies  
8

9 755 **Table S3.** Methodological Quality Assessments Of Studies Included With  
10  
11  
12 756 Newcastle-Ottawa Scales  
13

14 757 **Figure S1.** Funnel Plots for Magnesium Intake and Type 2 Diabetes (A), Ischemic  
15  
16 758 Stroke (B) and Hemorrhagic Stroke (C).  
17

18 759 **Figure S2.** Forest Plots for Risk of Total Stroke for Magnesium Intake (A) and for <  
19  
20 760 50 mg/day (B),  $\geq 50$  and < 100 mg/day (C),  $\geq 100$  and <150 mg/day (D) and  $\geq 150$   
21  
22 761 mg/day Magnesium increments (E).  
23

24 762 **Figure S3.** Forest Plots for Risk of Ischemic Stroke for Magnesium Intake (A) and for  
25  
26 763 < 50 mg/day (B),  $\geq 50$  and < 100 mg/day (C),  $\geq 100$  and <150 mg/day (D) and  $\geq 150$   
27  
28 764 mg/day Magnesium increments (E).  
29

30 765 **Figure S4.** Forest Plots for Risk of Hemorrhagic Stroke for Magnesium Intake (A)  
31  
32 766 and for < 50 mg/day (B),  $\geq 50$  and < 100 mg/day (C),  $\geq 100$  and <150 mg/day (D) and  
33  
34 767  $\geq 150$  mg/day Magnesium increments (E).  
35

36 768 **Figure S5.** Forest Plots for Risk of Subarachnoid Hemorrhage for Magnesium Intake  
37  
38 769 (A) and for < 50 mg/day (B),  $\geq 50$  and < 100 mg/day (C),  $\geq 100$  and <150 mg/day (D)  
39  
40 770 and  $\geq 150$  mg/day Magnesium increments (E)  
41

42 771 **Figure S6.** Forest Plots for Risk of Intracerebral Hemorrhage for Magnesium Intake  
43  
44 772 (A) and for < 50 mg/day (B),  $\geq 50$  and < 100 mg/day (C),  $\geq 100$  and <150 mg/day (D)  
45  
46 773 and  $\geq 150$  mg/day Magnesium increments (E)  
47

48 774 **Figure S7.** Meta-Regression of Relative Risk for Type 2 Diabetes According to Body  
49  
50 775 Mass Index (A,  $P = 0.716$ ), Sex (B,  $P = 0.284$ ), Participant Region (C,  $P = 0.904$ ) and  
51  
52 776 Dietary Assessment (D,  $P = 0.521$ ).  
53  
54  
55  
56  
57  
58  
59  
60

1  
2  
3 777 **Figure S8.** Meta-Regression of Relative Risk for Total Stroke According to Body  
4  
5 778 Mass Index (A,  $P = 0.606$ ), Sex (B,  $P = 0.112$ ), Participant region (C,  $P = 0.891$ ) and  
6  
7 779 Dietary Assessment (D,  $P = 0.891$ ).

8  
9  
10 780 **Figure S9.** Meta-Regression of Relative Risk for Ischemic Stroke According to Body  
11  
12 781 Mass Index (A,  $P = 0.631$ ), Sex (B,  $P = 0.134$ ), Participant Region (C,  $P = 0.584$ ) and  
13  
14 782 Dietary Assessment (D, no regression  $P$ -value due to limited data).

15  
16  
17 783 **Figure S10.** Meta-Regression of Relative Risk for Hemorrhagic Stroke According to  
18  
19 784 Body Mass Index (A,  $P = 0.418$ ), Sex (B,  $P = 0.872$ ), Participant Region (C,  $P =$   
20  
21 785  $0.872$ ) and Dietary Assessment (D, no regression  $P$ -value due to limited data).

22  
23  
24 786 **Figure S11.** Cumulative Meta-Analysis Related to Magnesium Intake and Type 2  
25  
26 787 Diabetes (T2D)

27  
28  
29 788 **Figure S12.** Cumulative Meta-Analysis Related to Magnesium Intake and Total  
30  
31 789 Stroke

32  
33 790 **Figure S13.** Cumulative Meta-Analysis Related to Magnesium Intake and Ischemic  
34  
35 791 Stroke

36  
37  
38 792 **Figure S14.** Cumulative Meta-Analysis Related to Magnesium Intake and  
39  
40 793 Hemorrhagic Stroke

41  
42 794 **Figure S15.** Dose-Response Effect on the Relationships between Magnesium Intake  
43  
44 795 and Subarachnoid Hemorrhage (A) and Intracerebral Hemorrhage (B).

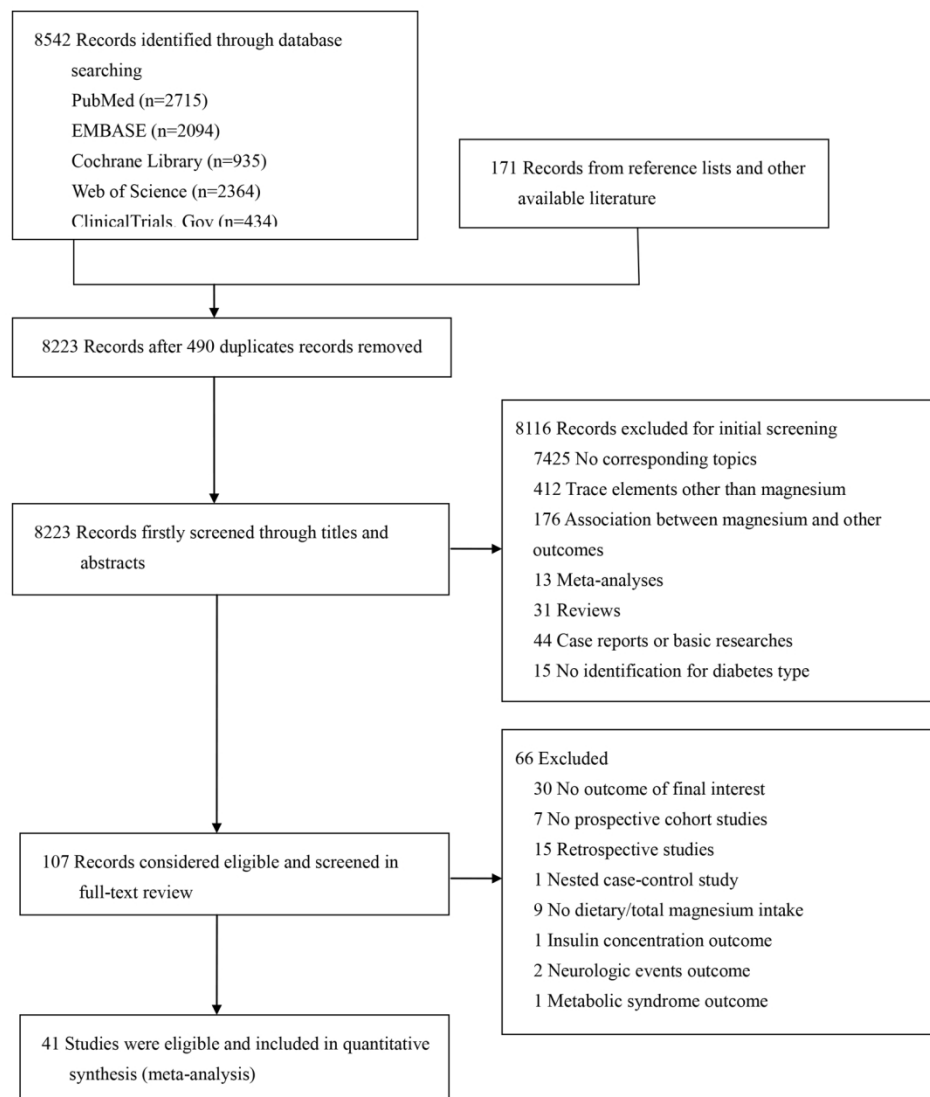

Figure 1. Flow Chart for Literature Search and Screening Process



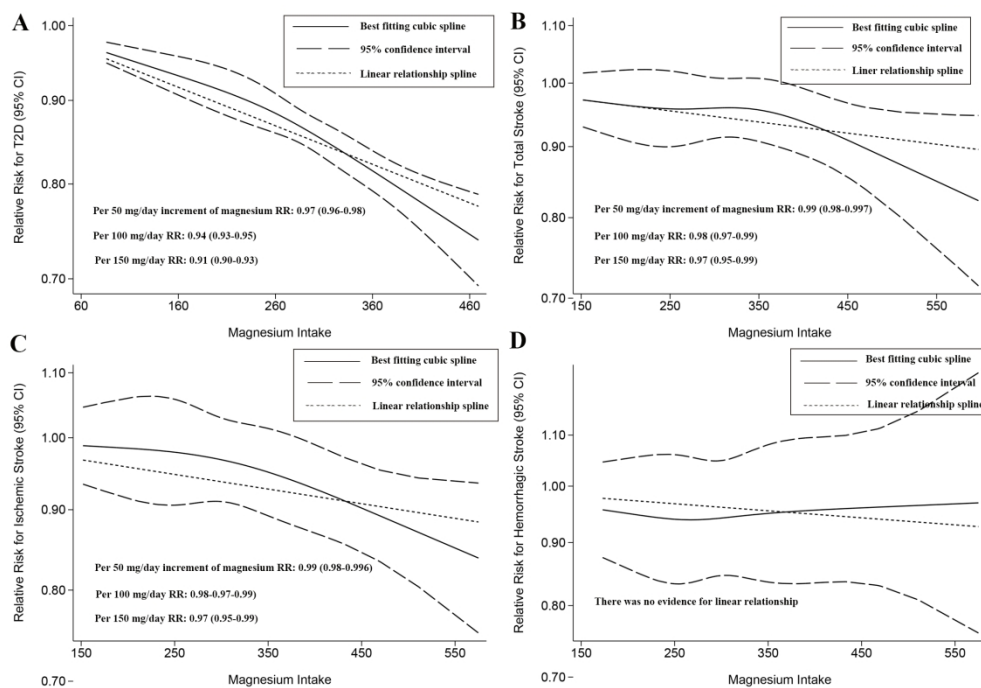

Figure 3. Two-Stage Dose-Response Effect on the Relationships between Magnesium Intake and Type 2 Diabetes (T2D) (A), Total Stroke (B), Ischemic Stroke (C) and Hemorrhagic Stroke (D).

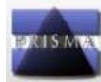

Table S1 PRISMA 2009 Checklist

| Section/topic                      | #  | Checklist item                                                                                                                                                                                                                                                                                              | Reported on page # |
|------------------------------------|----|-------------------------------------------------------------------------------------------------------------------------------------------------------------------------------------------------------------------------------------------------------------------------------------------------------------|--------------------|
| <b>TITLE</b>                       |    |                                                                                                                                                                                                                                                                                                             | <b>1</b>           |
| Title                              | 1  | Identify the report as a systematic review, meta-analysis, or both.                                                                                                                                                                                                                                         | 1                  |
| <b>ABSTRACT</b>                    |    |                                                                                                                                                                                                                                                                                                             | <b>2-3</b>         |
| Structured summary                 | 2  | Provide a structured summary including, as applicable: background; objectives; data sources; study eligibility criteria, participants, and interventions; study appraisal and synthesis methods; results; limitations; conclusions and implications of key findings; systematic review registration number. | 2-3                |
| <b>INTRODUCTION</b>                |    |                                                                                                                                                                                                                                                                                                             | <b>4-5</b>         |
| Rationale                          | 3  | Describe the rationale for the review in the context of what is already known.                                                                                                                                                                                                                              | 4                  |
| Objectives                         | 4  | Provide an explicit statement of questions being addressed with reference to participants, interventions, comparisons, outcomes, and study design (PICOS).                                                                                                                                                  | 4-5                |
| <b>METHODS</b>                     |    |                                                                                                                                                                                                                                                                                                             | <b>5-9</b>         |
| Protocol and registration          | 5  | Indicate if a review protocol exists, if and where it can be accessed (e.g., Web address), and, if available, provide registration information including registration number.                                                                                                                               | 5                  |
| Eligibility criteria               | 6  | Specify study characteristics (e.g., PICOS, length of follow-up) and report characteristics (e.g., years considered, language, publication status) used as criteria for eligibility, giving rationale.                                                                                                      | 5-6                |
| Information sources                | 7  | Describe all information sources (e.g., databases with dates of coverage, contact with study authors to identify additional studies) in the search and date last searched.                                                                                                                                  | 5-6                |
| Search                             | 8  | Present full electronic search strategy for at least one database, including any limits used, such that it could be repeated.                                                                                                                                                                               | 5-6                |
| Study selection                    | 9  | State the process for selecting studies (i.e., screening, eligibility, included in systematic review, and, if applicable, included in the meta-analysis).                                                                                                                                                   | 5-6                |
| Data collection process            | 10 | Describe method of data extraction from reports (e.g., piloted forms, independently, in duplicate) and any processes for obtaining and confirming data from investigators.                                                                                                                                  | 6                  |
| Data items                         | 11 | List and define all variables for which data were sought (e.g., PICOS, funding sources) and any assumptions and simplifications made.                                                                                                                                                                       | 6                  |
| Risk of bias in individual studies | 12 | Describe methods used for assessing risk of bias of individual studies (including specification of whether this was done at the study or outcome level), and how this information is to be used in any data synthesis.                                                                                      | 6                  |
| Summary measures                   | 13 | State the principal summary measures (e.g., risk ratio, difference in means).                                                                                                                                                                                                                               | 6                  |
| Synthesis of results               | 14 | Describe the methods of handling data and combining results of studies, if done, including measures of consistency (e.g., $I^2$ ) for each meta-analysis.                                                                                                                                                   | 6-10               |

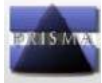

# Table S1 PRISMA 2009 Checklist

Page 1 of 2

| Section/topic                 | #  | Checklist item                                                                                                                                                                                           | Reported on page # |
|-------------------------------|----|----------------------------------------------------------------------------------------------------------------------------------------------------------------------------------------------------------|--------------------|
| Risk of bias across studies   | 15 | Specify any assessment of risk of bias that may affect the cumulative evidence (e.g., publication bias, selective reporting within studies).                                                             | 7                  |
| Additional analyses           | 16 | Describe methods of additional analyses (e.g., sensitivity or subgroup analyses, meta-regression), if done, indicating which were pre-specified.                                                         | 8-9                |
| <b>RESULTS</b>                |    |                                                                                                                                                                                                          | <b>9-16</b>        |
| Study selection               | 17 | Give numbers of studies screened, assessed for eligibility, and included in the review, with reasons for exclusions at each stage, ideally with a flow diagram.                                          | 9                  |
| Study characteristics         | 18 | For each study, present characteristics for which data were extracted (e.g., study size, PICOS, follow-up period) and provide the citations.                                                             | 9-10               |
| Risk of bias within studies   | 19 | Present data on risk of bias of each study and, if available, any outcome level assessment (see item 12).                                                                                                | 9-10               |
| Results of individual studies | 20 | For all outcomes considered (benefits or harms), present, for each study: (a) simple summary data for each intervention group (b) effect estimates and confidence intervals, ideally with a forest plot. | 10-16              |
| Synthesis of results          | 21 | Present results of each meta-analysis done, including confidence intervals and measures of consistency.                                                                                                  | 10-16              |
| Risk of bias across studies   | 22 | Present results of any assessment of risk of bias across studies (see Item 15).                                                                                                                          | 10-16              |
| Additional analysis           | 23 | Give results of additional analyses, if done (e.g., sensitivity or subgroup analyses, meta-regression [see Item 16]).                                                                                    | 10-16              |
| <b>DISCUSSION</b>             |    |                                                                                                                                                                                                          | <b>16-22</b>       |
| Summary of evidence           | 24 | Summarize the main findings including the strength of evidence for each main outcome; consider their relevance to key groups (e.g., healthcare providers, users, and policy makers).                     | 16-22              |
| Limitations                   | 25 | Discuss limitations at study and outcome level (e.g., risk of bias), and at review-level (e.g., incomplete retrieval of identified research, reporting bias).                                            | 21-22              |
| Conclusions                   | 26 | Provide a general interpretation of the results in the context of other evidence, and implications for future research.                                                                                  | 22                 |
| <b>FUNDING</b>                |    |                                                                                                                                                                                                          | <b>23</b>          |
| Funding                       | 27 | Describe sources of funding for the systematic review and other support (e.g., supply of data); role of funders for the systematic review.                                                               | 23                 |

From: Moher D, Liberati A, Tetzlaff J, Altman DG, The PRISMA Group (2009). Preferred Reporting Items for Systematic Reviews and Meta-Analyses: The PRISMA Statement. PLoS Med 6(7): e1000097. doi:10.1371/journal.pmed1000097

For more information, visit: [www.prisma-statement.org](http://www.prisma-statement.org).

Page 2 of 2

For peer review only - <http://bmjopen.bmj.com/site/about/guidelines.xhtml>



**Table S2** Summary of Baseline Characteristics of Included Studies

| Source                         | Nation   | Period                       | Population               | BMI          | Dietary Assessment | Case Ascertainment                               | Case (Cohort size)                             | Magnesium intake (mg/day)<br>highest VS. the lowest<br>[Adjusted RR (95% CI)] |
|--------------------------------|----------|------------------------------|--------------------------|--------------|--------------------|--------------------------------------------------|------------------------------------------------|-------------------------------------------------------------------------------|
| Salmeron 1997 <sup>11</sup>    | USA      | 1986-1992                    | M; 40-75 y               | 25.5         | validated SFFQ     | self-reported questionnaire                      | 523 T2D (42759)                                | 461 VS. 262 (0.72 (0.54-0.96))                                                |
| Salmeron 1997(2) <sup>12</sup> | USA      | 1986-1992                    | F; 40-65 y               | 25.1         | validated SFFQ     | self-reported questionnaire                      | 915 T2D (65173)                                | 338 VS. 222 (0.62 (0.50-0.78))                                                |
| Ascherio 1998 <sup>13</sup>    | USA      | 1986-1994                    | M; 40-75 y               | NA           | validated FFQ      | self-reported questionnaire                      | 328 stroke (43738)                             | 425 VS. 243 (0.92 (0.58-1.46))                                                |
| Iso 1999 <sup>14</sup>         | USA      | 1980-1994                    | F; 34-59 y               | 22.7         | FFQ                | self-reported questionnaire                      | 690 stroke (85764)                             | 381 VS. 211 (0.80 (0.63-1.01))                                                |
| Kao 1999 <sup>15</sup>         | USA      | NA                           | M/F; 45-64 y             | 27.2         | FFQ                | self-reported questionnaire                      | black: 367 T2D (2622)<br>white: 739 T2D (9506) | 374 VS. 264 (0.95 (0.52-1.74))<br>418 VS. 308 (0.80 (0.56-1.14))              |
| Liu 2000 <sup>16</sup>         | USA      | 1976-1984                    | F; 38-63 y               | 24.8         | validated FFQ      | self-reported questionnaire                      | 1879 T2D (75521)                               | 342 VS. 248 (0.75 (0.63-0.89))                                                |
| Meyer 2000 <sup>17</sup>       | USA      | 1986-1992                    | F; 55-69 y               | 26.8         | validated FFQ      | self-reported questionnaire                      | 1141 T2D (35998)                               | 362 VS. 220 (0.67 (0.55-0.82))                                                |
| Hodge 2004 <sup>18a</sup>      | multiple | 1990-1994                    | M/F; 45-64 y             | 26.1         | validated FFQ      | self-reported questionnaire                      | 365 T2D (31641)                                | 500 increment per day                                                         |
| Lopez 2004 <sup>19</sup>       | USA      | M: 1986-1998<br>W: 1980-1998 | M; 40-75 y<br>F; 30-35 y | 25.4<br>24.3 | validated SFFQ     | self-reported questionnaire                      | 1333 T2D (42872)<br>4085 T2D (85060)           | 457 VS. 314 (0.72 (0.58-0.89))<br>373 VS. 222 (0.73 (0.65-0.82))              |
| Song 2004 <sup>20</sup>        | USA      | 1993-2001                    | F; ≥45 y <sup>c</sup>    | 26           | SFFQ               | self-reported questionnaire                      | 918 T2D (38025)                                | 433 VS. 255 (0.89 (0.71-1.10))                                                |
| Song 2005 <sup>21</sup>        | USA      | 1993-2003                    | F; 39-89 y               | 26           | FFQ                | follow-up examination                            | 368 stroke (39876)                             | 433 VS. 255 (0.90 (0.65-1.26))                                                |
| Liu 2006 <sup>22</sup>         | USA      | 1996-2006                    | F; 47-63 y               | 25.8         | validated SFFQ     | self-reported questionnaire                      | 1603 T2D (37183)                               | 340 VS. 307 (0.80 (0.67-0.95))                                                |
| Pereira 2006 <sup>23</sup>     | USA      | 1986-1997                    | F; 56-66 y               | 26.7         | validated FFQ      | self-reported questionnaire                      | 1418 T2D (28812)                               | 334 VS. 281 (0.78(0.61-1.01))                                                 |
| Pittas 2006 <sup>24</sup>      | USA      | 1980-2000                    | F; 30-55 y               | 24.1         | validated SFFQ     | self-reported questionnaire                      | 4843 T2D (83779)                               | 352 VS. 258 (0.74 (0.67-0.82))                                                |
| Van 2006 <sup>25</sup>         | multiple | 1995-2003                    | F; 21-69 y               | 27.6         | validated FFQ      | self-reported questionnaire                      | 1964 T2D (41186)                               | 244 VS. 115 (0.65 (0.54-0.78))                                                |
| Schulze 2007 <sup>26</sup>     | multiple | 1994-2005                    | M/F; 35-65 y             | 26.1         | validated SFFQ     | self-reported questionnaire                      | 844 T2D (25067)                                | 377 VS. 268 (0.99 (0.78-1.26))                                                |
| Larsson 2008 <sup>27</sup>     | Sweden   | 1985-2004                    | M; 50-69 y               | 26.4         | validated FFQ      | follow-up examination                            | 3370 stroke (26556)                            | 575 VS. 382 (0.91 (0.77-1.07))                                                |
| Weng 2008 <sup>28</sup>        | Taipei   | 1989-2002                    | M/F; ≥40 y               | 24.5         | validated FFQ      | Self-reported and<br>cross-checked questionnaire | 132 ischemic stroke (1772)                     | 423 VS. 162 (0.69 (0.45-1.06))                                                |
| Kirii 2009 <sup>29</sup>       | Japan    | 1993-1998                    | M; 40-69 y<br>F; 40-69 y | 23.6<br>23.5 | FFQ                | self-reported questionnaire                      | 634 T2D (25876)<br>480 T2D (33919)             | 331 VS. 245 (0.93 (0.71-1.22))<br>314 VS. 248 (0.76 (0.56-1.03))              |
| Ohira 2009 <sup>30</sup>       | USA      | 1987-2004                    | M/F; 45-64 y             | 27.4         | validated FFQ      | follow-up examination                            | 577 ischemic stroke (14221)                    | 362 VS. 152 (0.80 (0.75-1.13))                                                |
| Villegas 2009 <sup>31</sup>    | China    | 2000-2006                    | F; 40-70 y               | 23.8         | validated FFQ      | follow-up examination                            | 2273 T2D (64191)                               | 318 VS. 214 (0.80 (0.68-0.93))                                                |
| Hopping 2010 <sup>32</sup>     | multiple | 1993-2007                    | M; 45-75 y<br>F; 45-75 y | NA           | validated FFQ      | self-reported questionnaire                      | 4555 T2D (36256)<br>4032 T2D (39256)           | 278 VS. 86 (0.77 (0.70-0.85))<br>300 VS. 93 (0.84 (0.76-0.93))                |
| Kim 2010 <sup>33</sup>         | USA      | 1985-2005                    | M/F; 18-30 y             | 24.5         | validated DHQ      | self-reported questionnaire                      | 330 T2D (4497)                                 | 302 VS. 182 (0.53 (0.32-0.86))                                                |
| Kirii 2010 <sup>34</sup>       | Japan    | NA                           | M/F; 40-65 y             | 22.9         | validated FFQ      | self-reported questionnaire                      | 459 T2D (17592)                                | 303 VS. 158 (0.64 (0.44-0.94))                                                |

|    |                                 |            |            |                |      |                              |                             |                             |                                |
|----|---------------------------------|------------|------------|----------------|------|------------------------------|-----------------------------|-----------------------------|--------------------------------|
| 1  | Nanri 2010 <sup>35</sup>        | Japan      | 1990-1995  | M; 40-65 y     | NA   | validated FFQ                | self-reported questionnaire | 634 T2D (25872)             | 348 VS. 213 (0.86 (0.63-1.16)) |
| 2  |                                 |            |            | F; 40-65 y     |      |                              |                             | 480 T2D (33919)             | 333 VS. 213 (0.92 (0.66-1.28)) |
| 3  | Larsson 2011 <sup>36</sup>      | Sweden     | 1998-2008  | F; 49-83 y     | 25   | validated FFQ                | follow-up examination       | 1680 stroke (34670)         | 373 VS. 297 (1.02 (0.82-1.27)) |
| 4  |                                 |            |            |                |      |                              | follow-up examination or    |                             |                                |
| 5  | Weng 2012 <sup>37</sup>         | Taipei     | 1993-2002  | M/F; ≥30 y     | 24   | validated FFQ                | self-reported questionnaire | 141 T2D (1604)              | 406 VS. 212 (0.44 (0.25-0.75)) |
| 6  |                                 |            |            |                |      |                              |                             |                             |                                |
| 7  | Zhang 2012 <sup>38</sup>        | Japan      | 1988-2006/ | M; 40-79 y     | 22.7 | validated FFQ                | follow-up examination       | 634 stroke (23083)          | 294 VS. 173 (1.03 (0.79-1.35)) |
| 8  |                                 |            |            | F; 40-79 y     | 22.9 |                              |                             | 620 stroke (35533)          | 274 VS. 175 (0.90 (0.69-1.16)) |
| 9  | Hata 2013 <sup>39</sup>         | Japan      | 1988-2009  | M/F; 40-79 y   | 22.9 | validated SFFQ               | self-reported questionnaire | 417 T2D (1999)              | 215 VS. 133 (0.63 (0.44-0.90)) |
| 10 |                                 |            |            |                |      |                              | follow-up examination and   |                             |                                |
| 11 | Lin 2013 <sup>40</sup>          | Taipei     | 1989-2002  | M/F; ≥ 18 y    | 23.3 | validated FFQ                | self-reported questionnaire | 123 stroke (2061)           | 378 VS. 210 (0.62 (0.40-0.97)) |
| 12 |                                 |            |            |                |      |                              |                             |                             |                                |
| 13 |                                 |            |            | M; 40-69 y     | 23.6 |                              |                             | 690 T2D (27769)             | 349 VS. 232 (0.84 (0.69-1.05)) |
| 14 | Oba 2013 <sup>41</sup>          | Japan      | 1990-2000  | F; 40-69 y     | 23.5 | validated FFQ                | self-reported questionnaire | 500 T2D (36864)             | 356 VS. 211 (0.69 (0.54-0.88)) |
| 15 |                                 |            |            |                |      |                              |                             |                             |                                |
| 16 | Sluijs 2013 <sup>42</sup>       | Netherland | NA         | M/F; 21-70 y   | NA   | FFQ                          | NA                          | 361 ischemic stroke (36359) | 435 VS. 253 (0.76 (0.57-1.01)) |
| 17 | Hruby 2014 <sup>43</sup>        | USA        | 1995-2001  | M/F; 26-81 y   | 27   | validated FFQ                | self-reported questionnaire | 179 T2D (2582)              | 395 VS. 235 (0.49 (0.27-0.88)) |
| 18 |                                 |            |            |                |      |                              |                             |                             |                                |
| 19 | Sluijs 2014 <sup>44</sup>       | Netherland | NA         | M/F; 21-70 y   | NA   | FFQ                          | follow-up examination       | 631 stroke (36094)          | 597 VS. 190 (0.64 (0.44-0.94)) |
| 20 | Adebamowo 2015 <sup>45</sup>    | USA        | 1986-2010  | M; 40-75 y     | 25.4 | validated FFQ                | self-reported questionnaire | 1547 stroke (42669)         | 467 VS. 267 (0.89 (0.71-1.11)) |
| 21 |                                 |            |            |                |      |                              |                             |                             |                                |
| 22 | Adebamowo 2015(2) <sup>46</sup> | USA        | 1976-2006  | F; 30-55 y     | 26.4 | validated FFQ                | self-reported questionnaire | 3237 stroke (86149)         | 411 VS. 233 (0.93 (0.79-1.08)) |
| 23 |                                 |            | 1989-2011  | F; 25-42 y     | 25.7 |                              |                             | 543 stroke (94715)          |                                |
| 24 | Bain 2015 <sup>47</sup>         | Britain    | 2002-2008  | M; 40-75 y     | 26.5 | 7-day diary recall           | follow-up examination       | 364 stroke (2000)           | 456 VS. 266 (0.81 (0.53-1.22)) |
| 25 |                                 |            |            | F; 40-75 y     | 26.2 |                              |                             | 511 stroke (2445)           | 374 VS. 456 (0.82 (0.54-1.24)) |
| 26 | Huang 2015 <sup>48</sup>        | Taipei     | 2000-2008  | M/F; ≥65 y     | NA   | 24 h dietary recall and SFFQ | follow-up examination       | 231 T2D (1400)              | 398 VS. 103 (0.59 (0.26-1.33)) |
| 27 |                                 |            |            |                |      |                              |                             |                             |                                |
| 28 |                                 |            | 1984-2012  | F; 30-55 y     | 24.8 |                              |                             | 7620 T2D (69176)            | 390 VS. 229 (0.80 (0.73-0.88)) |
| 29 | Hruby 2017 <sup>49</sup>        | USA        | 1991-2013  | F; 25-42 y     | 24.6 | validated SFFQ               | self-reported questionnaire | 6080 T2D (91471)            | 424 VS. 249 (0.89 (0.81-0.99)) |
| 30 |                                 |            |            |                |      |                              |                             |                             |                                |
| 31 |                                 |            | 1986-2012  | M; mean 53.5 y | 24.8 |                              |                             | 3430 T2D (42096)            | 469 VS. 280 (0.88 (0.77-1.00)) |
| 32 | Kokubo 2017 <sup>50b</sup>      | Japan      | 1990-2009  | M; 40-69 y     | 23.6 | FFQ                          | follow-up examination       | 2576 stroke (39505)         | 348 VS. 213 (1.07 (0.86-1.33)) |
| 33 |                                 |            |            |                |      |                              |                             |                             |                                |
| 34 |                                 |            | 1993-2010  | F; 40-69 y     | 23.6 |                              |                             | 1846 stroke (45788)         | 333 VS. 213 (0.88 (0.67-1.14)) |
| 35 | Konishi 2017 <sup>51</sup>      | Japan      | 1992-2002  | M; ≥35 y       | 22.6 | validated FFQ                | self-reported questionnaire | 266 T2D (5885)              | 469 VS. 310 (1.13 (0.76-1.70)) |
| 36 |                                 |            |            | F; ≥35 y       | 22.1 |                              |                             | 172 T2D (7640)              | 432 VS. 285 (0.50 (0.30-0.84)) |

37 Abbreviations: FFQ, food-frequency questionnaire; SFFQ, semi-quantitative food-frequency questionnaire; BMI, body mass index; T2D, type 2 diabetes; NA, not available.

38 <sup>a</sup>, different ethnicities of participants are in multiple nations cohort;

39 <sup>b</sup>, the dose of magnesium intake which is not available in this study is retrieved from the same cohort reported in former publication;

40 <sup>c</sup> the range of enrolled participants age is not mentioned.

41

42

43

44

45

46

**Table S3** Methodological Quality Assessments Of Included Studies With Newcastle-Ottwa Scales

|    | Study | Selection                         |                   |                           |                     | Comparability | Outcome               |                     |                       | Total score |
|----|-------|-----------------------------------|-------------------|---------------------------|---------------------|---------------|-----------------------|---------------------|-----------------------|-------------|
|    |       | Exposed cohort                    | Nonexposed cohort | Ascertainment of exposure | Outcome of interest |               | Assessment of outcome | Length of follow-up | Adequacy of follow-up |             |
| 7  | 1997  | Salmeron et al, <sup>11</sup>     | *                 | *                         | *                   | *             | **                    | *                   | *                     | 9           |
| 8  | 1997  | Salmeron et al (2), <sup>12</sup> | *                 | *                         | *                   | *             | **                    | *                   | *                     | 9           |
| 9  | 1998  | Ascherio et al, <sup>13</sup>     | *                 | *                         | *                   | *             | **                    | *                   | *                     | 9           |
| 10 | 1999  | Iso et al, <sup>14</sup>          | *                 | *                         | *                   | *             | **                    | *                   | *                     | 9           |
| 11 | 1999  | Kao et al, <sup>15</sup>          | *                 | *                         | *                   | *             | **                    | *                   | *                     | 9           |
| 12 | 1999  | Kao et al, <sup>15</sup>          | *                 | *                         | *                   | *             | **                    | *                   | *                     | 9           |
| 13 | 2000  | Liu et al, <sup>16</sup>          | *                 | *                         | *                   | *             | **                    | *                   | *                     | 9           |
| 14 | 2000  | Meyer et al, <sup>17</sup>        | *                 | *                         | *                   | *             | **                    | *                   | *                     | 9           |
| 15 | 2000  | Meyer et al, <sup>17</sup>        | *                 | *                         | *                   | *             | **                    | *                   | *                     | 9           |
| 16 | 2004  | Hodge et al, <sup>18</sup>        | *                 | *                         | *                   | *             | *                     | *                   | *                     | 7           |
| 17 | 2004  | Hodge et al, <sup>18</sup>        | *                 | *                         | *                   | *             | *                     | *                   | *                     | 7           |
| 18 | 2004  | Lopez et al, <sup>19</sup>        | *                 | *                         | *                   | *             | **                    | *                   | *                     | 9           |
| 19 | 2004  | Lopez et al, <sup>19</sup>        | *                 | *                         | *                   | *             | **                    | *                   | *                     | 9           |
| 20 | 2004  | Song et al, <sup>20</sup>         | *                 | *                         | *                   | *             | **                    | *                   | *                     | 9           |
| 21 | 2004  | Song et al, <sup>20</sup>         | *                 | *                         | *                   | *             | **                    | *                   | *                     | 9           |
| 22 | 2005  | Song et al, <sup>21</sup>         | *                 | *                         | *                   | *             | **                    | *                   | *                     | 9           |
| 23 | 2005  | Song et al, <sup>21</sup>         | *                 | *                         | *                   | *             | **                    | *                   | *                     | 9           |
| 24 | 2006  | Liu et al, <sup>22</sup>          | *                 | *                         | *                   | *             | **                    | *                   | *                     | 9           |
| 25 | 2006  | Liu et al, <sup>22</sup>          | *                 | *                         | *                   | *             | **                    | *                   | *                     | 9           |
| 26 | 2006  | Pereira et al, <sup>23</sup>      | *                 | *                         | *                   | *             | **                    | *                   | *                     | 9           |
| 27 | 2006  | Pereira et al, <sup>23</sup>      | *                 | *                         | *                   | *             | **                    | *                   | *                     | 9           |
| 28 | 2006  | Pittas et al, <sup>24</sup>       | *                 | *                         | *                   | *             | **                    | *                   | *                     | 9           |
| 29 | 2006  | Pittas et al, <sup>24</sup>       | *                 | *                         | *                   | *             | **                    | *                   | *                     | 9           |
| 30 | 2006  | Van et al, <sup>25</sup>          | *                 | *                         | *                   | *             | **                    | *                   | *                     | 9           |
| 31 | 2006  | Van et al, <sup>25</sup>          | *                 | *                         | *                   | *             | **                    | *                   | *                     | 9           |
| 32 | 2007  | Schulze et al, <sup>26</sup>      | *                 | *                         | *                   | *             | **                    | *                   | *                     | 9           |
| 33 | 2007  | Schulze et al, <sup>26</sup>      | *                 | *                         | *                   | *             | **                    | *                   | *                     | 9           |
| 34 | 2008  | Larsson et al, <sup>27</sup>      | *                 | *                         | *                   | *             | **                    | *                   | *                     | 9           |
| 35 | 2008  | Larsson et al, <sup>27</sup>      | *                 | *                         | *                   | *             | **                    | *                   | *                     | 9           |
| 36 | 2008  | Weng et al, <sup>28</sup>         | *                 | *                         | *                   | *             | **                    | *                   | *                     | 9           |
| 37 | 2008  | Weng et al, <sup>28</sup>         | *                 | *                         | *                   | *             | **                    | *                   | *                     | 9           |
| 38 | 2009  | Kirii et al, <sup>29</sup>        | *                 | *                         | *                   | *             | **                    | *                   | *                     | 9           |
| 39 | 2009  | Kirii et al, <sup>29</sup>        | *                 | *                         | *                   | *             | **                    | *                   | *                     | 9           |
| 40 | 2009  | Ohira et al, <sup>30</sup>        | *                 | *                         | *                   | *             | **                    | *                   | *                     | 9           |
| 41 | 2009  | Ohira et al, <sup>30</sup>        | *                 | *                         | *                   | *             | **                    | *                   | *                     | 9           |
| 42 | 2009  | Villegas et al, <sup>31</sup>     | *                 | *                         | *                   | *             | **                    | *                   | *                     | 9           |
| 43 | 2009  | Villegas et al, <sup>31</sup>     | *                 | *                         | *                   | *             | **                    | *                   | *                     | 9           |
| 44 | 2010  | Hopping et al, <sup>32</sup>      | *                 | *                         | *                   | *             | **                    | *                   | *                     | 9           |
| 45 | 2010  | Hopping et al, <sup>32</sup>      | *                 | *                         | *                   | *             | **                    | *                   | *                     | 9           |
| 46 | 2010  | Kim et al, <sup>33</sup>          | *                 | *                         | *                   | *             | **                    | *                   | *                     | 8           |
| 47 | 2010  | Kim et al, <sup>33</sup>          | *                 | *                         | *                   | *             | **                    | *                   | *                     | 8           |
| 48 | 2010  | Kirii et al, <sup>34</sup>        | *                 | *                         | *                   | *             | **                    | *                   | *                     | 9           |
| 49 | 2010  | Kirii et al, <sup>34</sup>        | *                 | *                         | *                   | *             | **                    | *                   | *                     | 9           |
| 50 | 2010  | Nanri et al, <sup>35</sup>        | *                 | *                         | *                   | *             | **                    | *                   | *                     | 9           |
| 51 | 2010  | Nanri et al, <sup>35</sup>        | *                 | *                         | *                   | *             | **                    | *                   | *                     | 9           |
| 52 | 2011  | Larsson et al, <sup>36</sup>      | *                 | *                         | *                   | *             | **                    | *                   | *                     | 9           |
| 53 | 2011  | Larsson et al, <sup>36</sup>      | *                 | *                         | *                   | *             | **                    | *                   | *                     | 9           |
| 54 | 2012  | Weng et al, <sup>37</sup>         | *                 | *                         | *                   | *             | **                    | *                   | *                     | 8           |
| 55 | 2012  | Weng et al, <sup>37</sup>         | *                 | *                         | *                   | *             | **                    | *                   | *                     | 8           |
| 56 | 2012  | Zhang et al, <sup>38</sup>        | *                 | *                         | *                   | *             | **                    | *                   | *                     | 9           |
| 57 | 2012  | Zhang et al, <sup>38</sup>        | *                 | *                         | *                   | *             | **                    | *                   | *                     | 9           |

|    |      |                                    |   |   |   |   |    |   |   |   |   |
|----|------|------------------------------------|---|---|---|---|----|---|---|---|---|
| 1  | 2013 | Hata et al, <sup>39</sup>          | * | * | * | * | ** | * | * | * | 9 |
| 2  | 2013 | Lin et al, <sup>40</sup>           | * | * | * | * | ** | * | * | * | 9 |
| 3  | 2013 | Oba et al, <sup>41</sup>           | * | * | * | * | ** | * | * | * | 9 |
| 4  | 2013 | Sluijs et al, <sup>42</sup>        | * | * | * | * | ** |   | * | * | 8 |
| 5  | 2014 | Hruby et al, <sup>43</sup>         | * | * | * | * | ** | * | * | * | 9 |
| 6  | 2014 | Sluijs et al, <sup>44</sup>        | * | * | * | * | ** | * | * | * | 9 |
| 7  | 2015 | Adebamowo et al, <sup>45</sup>     | * | * | * | * | ** | * | * | * | 9 |
| 8  | 2015 | Adebamowo et al (2), <sup>46</sup> | * | * | * | * | ** | * | * | * | 9 |
| 9  | 2015 | Bain et al, <sup>47</sup>          | * | * | * | * | ** | * | * | * | 9 |
| 10 | 2015 | Huang et al, <sup>48</sup>         | * | * | * |   | ** | * | * | * | 8 |
| 11 | 2017 | Hruby et al, <sup>49</sup>         | * | * | * | * | ** | * | * | * | 9 |
| 12 | 2017 | Kokubo et al, <sup>50</sup>        | * | * | * | * | ** | * | * | * | 9 |
| 13 | 2017 | Konishi et al, <sup>51</sup>       | * | * | * | * | *  | * | * | * | 9 |

For peer review only

1  
2  
3  
4  
5  
6  
7  
8  
9  
10  
11  
12  
13  
14  
15  
16  
17  
18  
19  
20  
21  
22  
23  
24  
25  
26  
27  
28  
29  
30  
31  
32  
33  
34  
35  
36  
37  
38  
39  
40  
41  
42  
43  
44  
45  
46  
47  
48  
49  
50  
51  
52  
53  
54  
55  
56  
57  
58  
59  
60

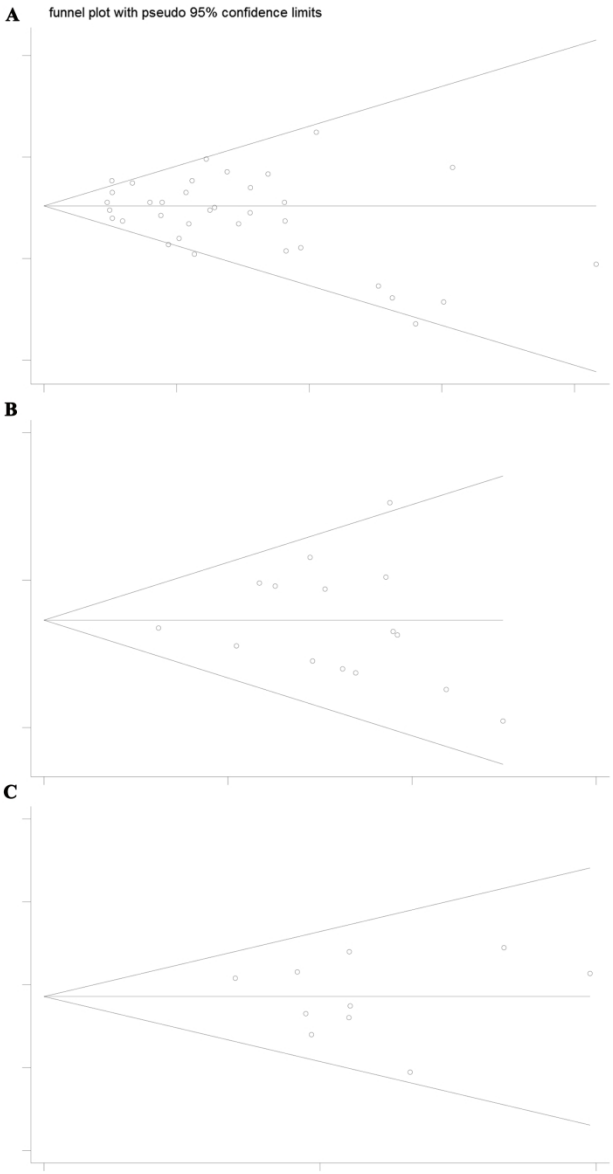

1  
2  
3  
4  
5  
6  
7  
8  
9  
10  
11  
12  
13  
14  
15  
16  
17  
18  
19  
20  
21  
22  
23  
24  
25  
26  
27  
28  
29  
30  
31  
32  
33  
34  
35  
36  
37  
38  
39  
40  
41  
42  
43  
44  
45  
46  
47  
48  
49  
50  
51  
52  
53  
54  
55  
56  
57  
58  
59  
60

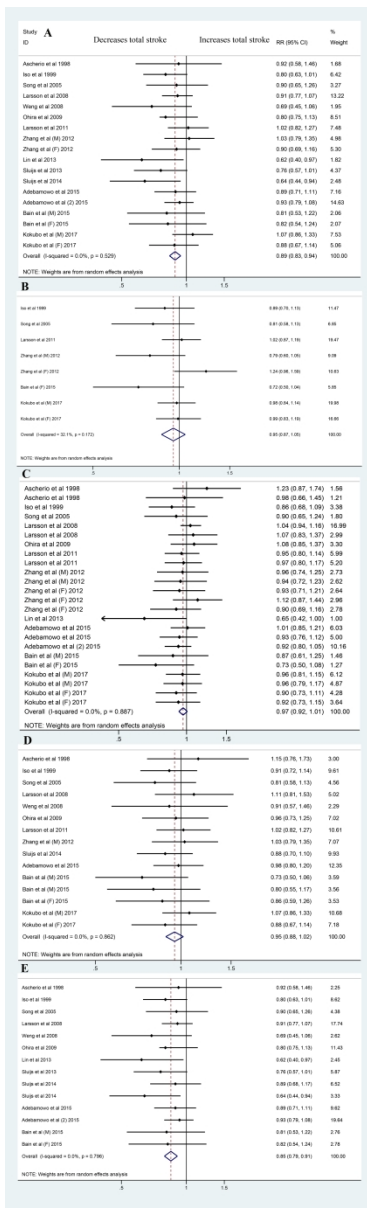

1  
2  
3  
4  
5  
6  
7  
8  
9  
10  
11  
12  
13  
14  
15  
16  
17  
18  
19  
20  
21  
22  
23  
24  
25  
26  
27  
28  
29  
30  
31  
32  
33  
34  
35  
36  
37  
38  
39  
40  
41  
42  
43  
44  
45  
46  
47  
48  
49  
50  
51  
52  
53  
54  
55  
56  
57  
58  
59  
60

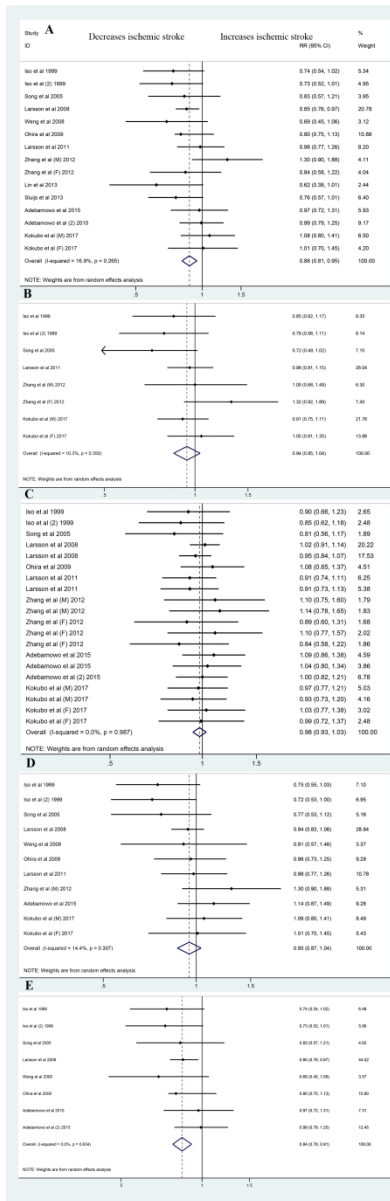

1  
2  
3  
4  
5  
6  
7  
8  
9  
10  
11  
12  
13  
14  
15  
16  
17  
18  
19  
20  
21  
22  
23  
24  
25  
26  
27  
28  
29  
30  
31  
32  
33  
34  
35  
36  
37  
38  
39  
40  
41  
42  
43  
44  
45  
46  
47  
48  
49  
50  
51  
52  
53  
54  
55  
56  
57  
58  
59  
60

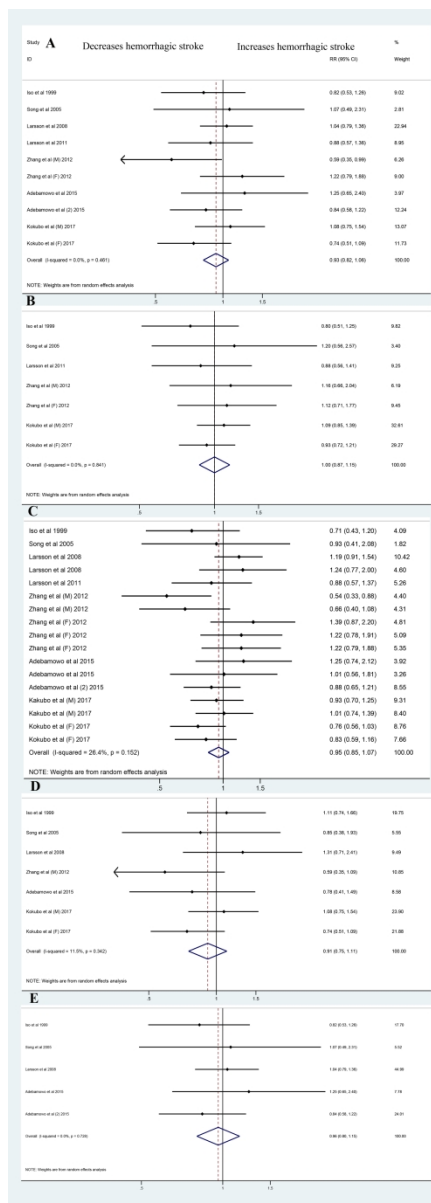



1  
2  
3  
4  
5  
6  
7  
8  
9  
10  
11  
12  
13  
14  
15  
16  
17  
18  
19  
20  
21  
22  
23  
24  
25  
26  
27  
28  
29  
30  
31  
32  
33  
34  
35  
36  
37  
38  
39  
40  
41  
42  
43  
44  
45  
46  
47  
48  
49  
50  
51  
52  
53  
54  
55  
56  
57  
58  
59  
60

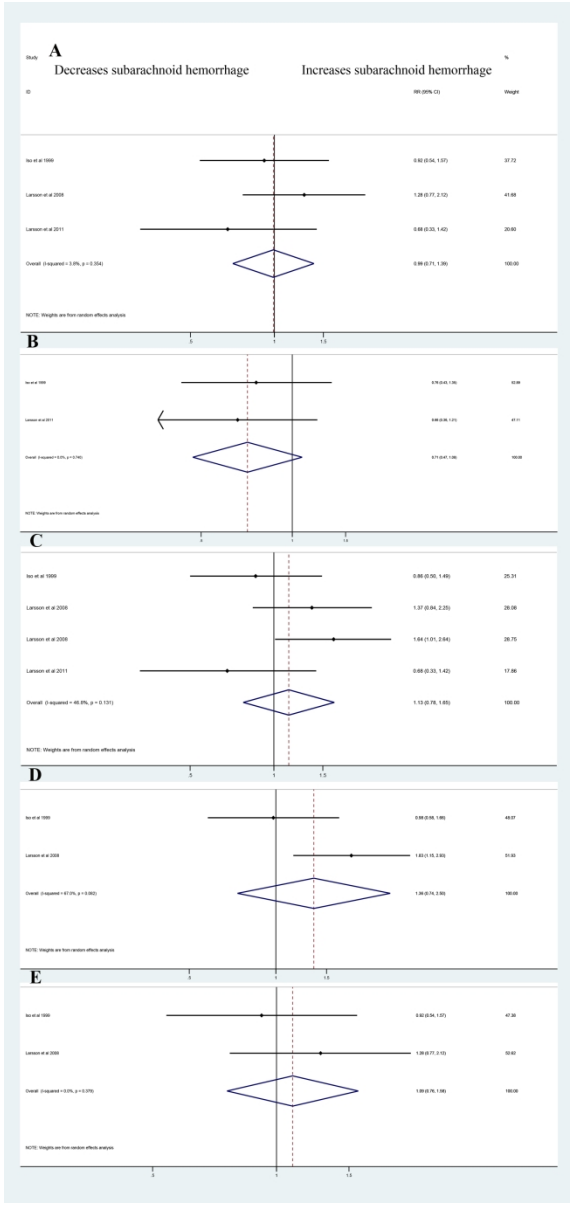

1  
2  
3  
4  
5  
6  
7  
8  
9  
10  
11  
12  
13  
14  
15  
16  
17  
18  
19  
20  
21  
22  
23  
24  
25  
26  
27  
28  
29  
30  
31  
32  
33  
34  
35  
36  
37  
38  
39  
40  
41  
42  
43  
44  
45  
46  
47  
48  
49  
50  
51  
52  
53  
54  
55  
56  
57  
58  
59  
60

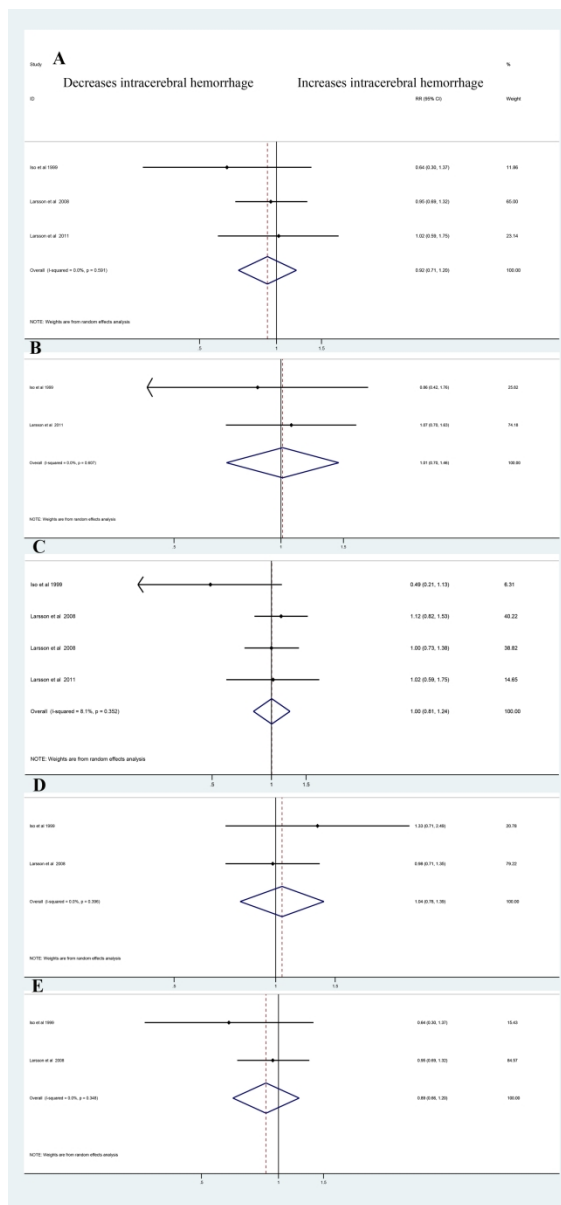

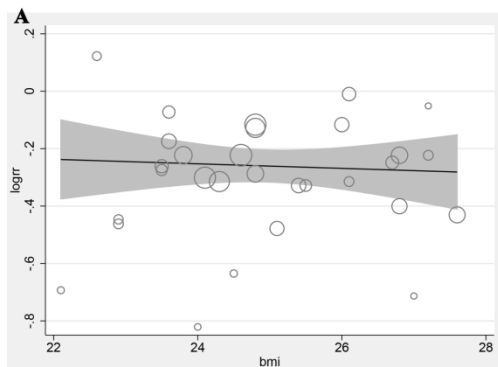

```

B
. tabulate sex, generate ( sexnew )

      sex | Freq.  Percent   Cum.
-----+-----
both male and female |    10     28.57   28.57
female              |    17     48.57   77.14
male                 |     8     22.86  100.00
-----+-----
Total                |    35    100.00

. metareg logrr sexnew1 sexnew2 sexnew3, wsize (selogrr) knapphartung reml
note: sexnew3 dropped because of collinearity

Meta-regression              Number of obs =    35
RMSE estimate of between-study variance      tau2 = .004692
% residual variation due to heterogeneity      I-squared_res = 36.58%
Proportion of between-study variance explained  Adj R-squared = -26.08%
Joint test for all covariates                  Model F(2,32) = 1.31
With Knapp-Hartung modification               Prob > F = 0.2841

      logrr | Coef.  Std. Err.   t   P>|t|   [95% Conf. Interval]
-----+-----
sexnew1    | -1.1314075  .0857798   -1.53  0.135   -1.3061323   -.0433174
sexnew2    | -.0630804   .0541113   -1.17  0.252   -1.733016   -.0471407
      _cons | -1.956565   .0461514   -4.24  0.000   -2.096637   -1.1016492
    
```

```

C
. tabulate participantregion, generate ( participantregionnew )

      participantregion | Freq.  Percent   Cum.
-----+-----
on                     |    35    100.00
Asia                   |    13     37.14   37.14
Multiple nations      |     5     14.29   51.43
North America         |    17     48.57   100.00
-----+-----
Total                  |    35    100.00

. metareg logrr participantregionnew1 participantregionnew2 participantregionnew3, wsize (selogrr) knapphartung reml
note: participantregionnew3 dropped because of collinearity

Meta-regression              Number of obs =    35
RMSE estimate of between-study variance      tau2 = .004698
% residual variation due to heterogeneity      I-squared_res = 35.22%
Proportion of between-study variance explained  Adj R-squared = -30.80%
Joint test for all covariates                  Model F(2,32) = 0.10
With Knapp-Hartung modification               Prob > F = 0.9047

      logrr | Coef.  Std. Err.   t   P>|t|   [95% Conf. Interval]
-----+-----
participantregionnew2 | .0027567  .0731865   0.04  0.970   -1.463193   .1518327
participantregionnew1 | -.001657  .0599158  -.034  0.739   -1.422102   .1018788
      _cons | -2.392399  .0510872  -4.68  0.000   -2.4833012  -1.1517166
    
```

```

D
. tabulate dietaryassessment, generate ( dietaryassessmentnew )

      dietaryassessment | Freq.  Percent   Cum.
-----+-----
24h dietary recall and FFQ |     1     2.86   2.86
FFQ                        |     4    11.43  14.29
SPFQ                       |     1     2.86  17.14
validated DRQ              |     1     2.86  20.00
validated FFQ              |    17    48.57  68.57
validated SPFQ             |    11    31.43  100.00
-----+-----
Total                       |    35    100.00

. metareg logrr dietaryassessmentnew1 dietaryassessmentnew2 dietaryassessmentnew3 dietaryassessmentnew4 dietaryassessmentnew5 dietaryassessmentnew6 dietaryassessmentnew7 dietaryassessmentnew8 dietaryassessmentnew9 dietaryassessmentnew10 dietaryassessmentnew11 dietaryassessmentnew12 dietaryassessmentnew13 dietaryassessmentnew14 dietaryassessmentnew15 dietaryassessmentnew16 dietaryassessmentnew17 dietaryassessmentnew18 dietaryassessmentnew19 dietaryassessmentnew20 dietaryassessmentnew21 dietaryassessmentnew22 dietaryassessmentnew23 dietaryassessmentnew24 dietaryassessmentnew25 dietaryassessmentnew26 dietaryassessmentnew27 dietaryassessmentnew28 dietaryassessmentnew29 dietaryassessmentnew30 dietaryassessmentnew31 dietaryassessmentnew32 dietaryassessmentnew33 dietaryassessmentnew34 dietaryassessmentnew35 dietaryassessmentnew36 dietaryassessmentnew37 dietaryassessmentnew38 dietaryassessmentnew39 dietaryassessmentnew40 dietaryassessmentnew41 dietaryassessmentnew42 dietaryassessmentnew43 dietaryassessmentnew44 dietaryassessmentnew45 dietaryassessmentnew46 dietaryassessmentnew47 dietaryassessmentnew48 dietaryassessmentnew49 dietaryassessmentnew50 dietaryassessmentnew51 dietaryassessmentnew52 dietaryassessmentnew53 dietaryassessmentnew54 dietaryassessmentnew55 dietaryassessmentnew56 dietaryassessmentnew57 dietaryassessmentnew58 dietaryassessmentnew59 dietaryassessmentnew60 dietaryassessmentnew61 dietaryassessmentnew62 dietaryassessmentnew63 dietaryassessmentnew64 dietaryassessmentnew65 dietaryassessmentnew66 dietaryassessmentnew67 dietaryassessmentnew68 dietaryassessmentnew69 dietaryassessmentnew70 dietaryassessmentnew71 dietaryassessmentnew72 dietaryassessmentnew73 dietaryassessmentnew74 dietaryassessmentnew75 dietaryassessmentnew76 dietaryassessmentnew77 dietaryassessmentnew78 dietaryassessmentnew79 dietaryassessmentnew80 dietaryassessmentnew81 dietaryassessmentnew82 dietaryassessmentnew83 dietaryassessmentnew84 dietaryassessmentnew85 dietaryassessmentnew86 dietaryassessmentnew87 dietaryassessmentnew88 dietaryassessmentnew89 dietaryassessmentnew90 dietaryassessmentnew91 dietaryassessmentnew92 dietaryassessmentnew93 dietaryassessmentnew94 dietaryassessmentnew95 dietaryassessmentnew96 dietaryassessmentnew97 dietaryassessmentnew98 dietaryassessmentnew99 dietaryassessmentnew100, wsize (selogrr) knapphartung reml
note: dietaryassessmentnew2 through dietaryassessmentnew100 dropped because of collinearity

Meta-regression              Number of obs =    35
RMSE estimate of between-study variance      tau2 = .004258
% residual variation due to heterogeneity      I-squared_res = 38.44%
Proportion of between-study variance explained  Adj R-squared = -14.42%
Joint test for all covariates                  Model F(15,29) = 0.16
With Knapp-Hartung modification               Prob > F = 0.5210

      logrr | Coef.  Std. Err.   t   P>|t|   [95% Conf. Interval]
-----+-----
dietaryassessmentnew1 | .1072405  .5101822   0.20  0.841   -1.07096   1.135451
dietaryassessmentnew2 | .0470373  .296468   1.58  0.124   -1.19403   1.073537
dietaryassessmentnew3 | -.1518405 .111752   -1.46  0.107   -1.152599   1.155849
dietaryassessmentnew4 | .1600754  .2811794   1.30  0.205   -1.194081   .8655519
dietaryassessmentnew5 | .1948872  .2812421   1.40  0.171   -1.057543   .6671218
dietaryassessmentnew6 | -.4388793 .279225   -1.57  0.131   -1.205958   -.0679791
    
```



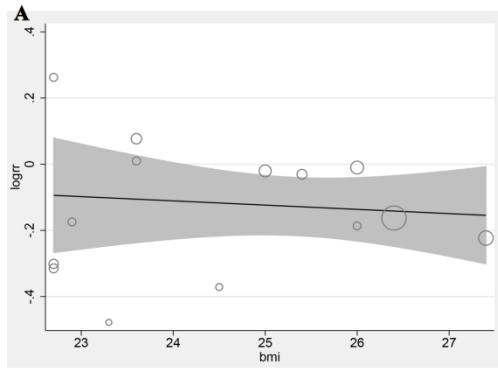

```

B tabulate sex, generate ( sexnew )
      sex      Freq.   Percent   Cum.
-----+-----
both male and female      4     26.67    26.67
female                    7     46.67    73.33
male                      4     26.67   100.00
-----+-----
Total                    15    100.00

. metareg logrr sexnew1 sexnew2 sexnew3, wase (selogrr) knapphartung reml
note: sexnew3 dropped because of collinearity

Meta-regression              Number of obs =    15
REML estimate of between-study variance      tau2      = .004782
% residual variation due to heterogeneity     I-squared_res = 1.79%
Proportion of between-study variance explained  Adj R-squared = .%
Joint test for all covariates                Model F(2,12) = 2.39
With Knapp-Hartung modification              Prob > F      = 0.1339

      logrr      Coef.   Std. Err.   t   P>|t|   [95% Conf. Interval]
-----+-----
sexnew1      -.2383161   .109578   -2.17   0.050   -0.4770662   -.0004339
sexnew2      -.0739192   .0940187  -0.79   0.447   -1.2787683   .1309299
      _cons      -.0480002   .0681983  -0.70   0.495   -1.1965933   .1005894
    
```

```

C . tabulate participantregion, generate ( participantregionnew )

participantregion
-----+-----
region      Freq.   Percent   Cum.
-----+-----
Asia        4     40.00    40.00
Europe      3     30.00    70.00
North America 4     40.00   100.00
-----+-----
Total      11    100.00

. metareg logrr participantregionnew1 participantregionnew2, wase (selogrr) knapphartung reml
note: participantregionnew3 dropped because of collinearity

Meta-regression              Number of obs =    15
REML estimate of between-study variance      tau2      = .0014
% residual variation due to heterogeneity     I-squared_res = 21.74%
Proportion of between-study variance explained  Adj R-squared = .%
Joint test for all covariates                Model F(2,12) = 0.56
With Knapp-Hartung modification              Prob > F      = 0.5842

      logrr      Coef.   Std. Err.   t   P>|t|   [95% Conf. Interval]
-----+-----
participantregionnew1      -.1089353   .1083661   1.01   0.335   -1.271992   .045197
participantregionnew2      .0517202   .0911749   0.53   0.598   -1.049328   .100332
      _cons      -.1429514   .0453255  -3.15   0.008   -.2024935   -.0804992
    
```

```

D . tabulate dietaryassessment, generate ( dietaryassessmentnew )

dietaryassessment
-----+-----
meat      Freq.   Percent   Cum.
-----+-----
FFQ       6     40.00    40.00
validated FFQ 9     60.00   100.00
-----+-----
Total      15    100.00

. metareg logrr dietaryassessmentnew1 dietaryassessmentnew2, wase (selogrr) knapphartung reml
note: dietaryassessmentnew3 dropped because of collinearity

Meta-regression              Number of obs =    15
REML estimate of between-study variance      tau2      = .001922
% residual variation due to heterogeneity     I-squared_res = 21.79%
Proportion of between-study variance explained  Adj R-squared = .%
With Knapp-Hartung modification

      logrr      Coef.   Std. Err.   t   P>|t|   [95% Conf. Interval]
-----+-----
dietaryassessmentnew2      .0410573   .0897444   0.46   0.655   -1.1528236   .2445382
      _cons      -.1429514   .0453255  -3.15   0.008   -.2024935   -.0804992
    
```

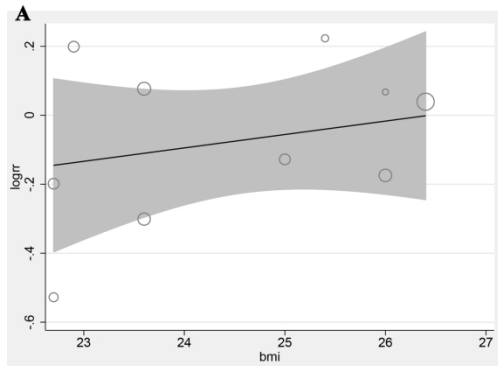

**C**

```
. tabulate participantregion, generate ( participantregionew )
```

| participantregion | Freq. | Percent | Cum.   |
|-------------------|-------|---------|--------|
| Asia              | 4     | 40.00   | 40.00  |
| Europe            | 2     | 20.00   | 60.00  |
| North America     | 4     | 40.00   | 100.00 |
| Total             | 10    | 100.00  |        |

```
. metareg logrr participantregionew1 participantregionew2 participantregionew3, wsize (selogrr) knapphartung reml
note: participantregionew3 dropped because of collinearity
```

Meta-regression

|                                                |               |   |          |
|------------------------------------------------|---------------|---|----------|
| REML estimate of between-study variance        | tau2          | = | -.508835 |
| % residual variation due to heterogeneity      | I-squared_res | = | 15.78%   |
| Proportion of between-study variance explained | Adj R-squared | = | .%       |
| Joint test for all covariates                  | Model # (2,3) | = | 0.14     |
| With Knapp-Hartung modification                | Prob > F      | = | 0.8726   |

| logrr                | Coef.     | Std. Err. | t     | P> t  | [95% Conf. Interval] |
|----------------------|-----------|-----------|-------|-------|----------------------|
| participantregionew1 | -.010555  | .1797495  | -0.06 | 0.954 | -.4356955 .4143845   |
| participantregionew2 | .0796745  | .1944402  | 0.41  | 0.694 | -.3801034 .5394224   |
| _cons                | -.9943218 | .1371043  | -6.49 | 0.514 | -.4195166 .228930    |

**B**

```
. tabulate sex, generate ( sexnew )
```

| sex    | Freq. | Percent | Cum.   |
|--------|-------|---------|--------|
| female | 6     | 60.00   | 60.00  |
| male   | 4     | 40.00   | 100.00 |
| Total  | 10    | 100.00  |        |

```
. metareg logrr sexnew1 sexnew2, wsize (selogrr) knapphartung reml
note: sexnew2 dropped because of collinearity
```

Meta-regression

|                                                |               |   |       |
|------------------------------------------------|---------------|---|-------|
| REML estimate of between-study variance        | tau2          | = | 0     |
| % residual variation due to heterogeneity      | I-squared_res | = | 0.42% |
| Proportion of between-study variance explained | Adj R-squared | = | .%    |
| With Knapp-Hartung modification                |               |   |       |

| logrr   | Coef.     | Std. Err. | t     | P> t  | [95% Conf. Interval] |
|---------|-----------|-----------|-------|-------|----------------------|
| sexnew1 | -.1120692 | .1333867  | -0.84 | 0.425 | -.4196595 .1955211   |
| _cons   | -.0110753 | .0978042  | -0.11 | 0.913 | -.2366123 .2144617   |

**D**

```
. tabulate dietaryassessment, generate ( dietaryassessmentnew )
```

| dietaryassessment | Freq. | Percent | Cum.   |
|-------------------|-------|---------|--------|
| FFQ               | 4     | 40.00   | 40.00  |
| validated FFQ     | 6     | 60.00   | 100.00 |
| Total             | 10    | 100.00  |        |

```
. metareg logrr dietaryassessmentnew1 dietaryassessmentnew2, wsize (selogrr) knapphartung reml
note: dietaryassessmentnew2 dropped because of collinearity
```

Meta-regression

|                                                |               |   |         |
|------------------------------------------------|---------------|---|---------|
| REML estimate of between-study variance        | tau2          | = | .001097 |
| % residual variation due to heterogeneity      | I-squared_res | = | 6.09%   |
| Proportion of between-study variance explained | Adj R-squared | = | .%      |
| With Knapp-Hartung modification                |               |   |         |

| logrr                 | Coef.    | Std. Err. | t     | P> t  | [95% Conf. Interval] |
|-----------------------|----------|-----------|-------|-------|----------------------|
| dietaryassessmentnew1 | .0642559 | .1426454  | 0.45  | 0.644 | -.2648051 .3911941   |
| _cons                 | -.112665 | .1133825  | -0.99 | 0.349 | -.2741255 .1487955   |

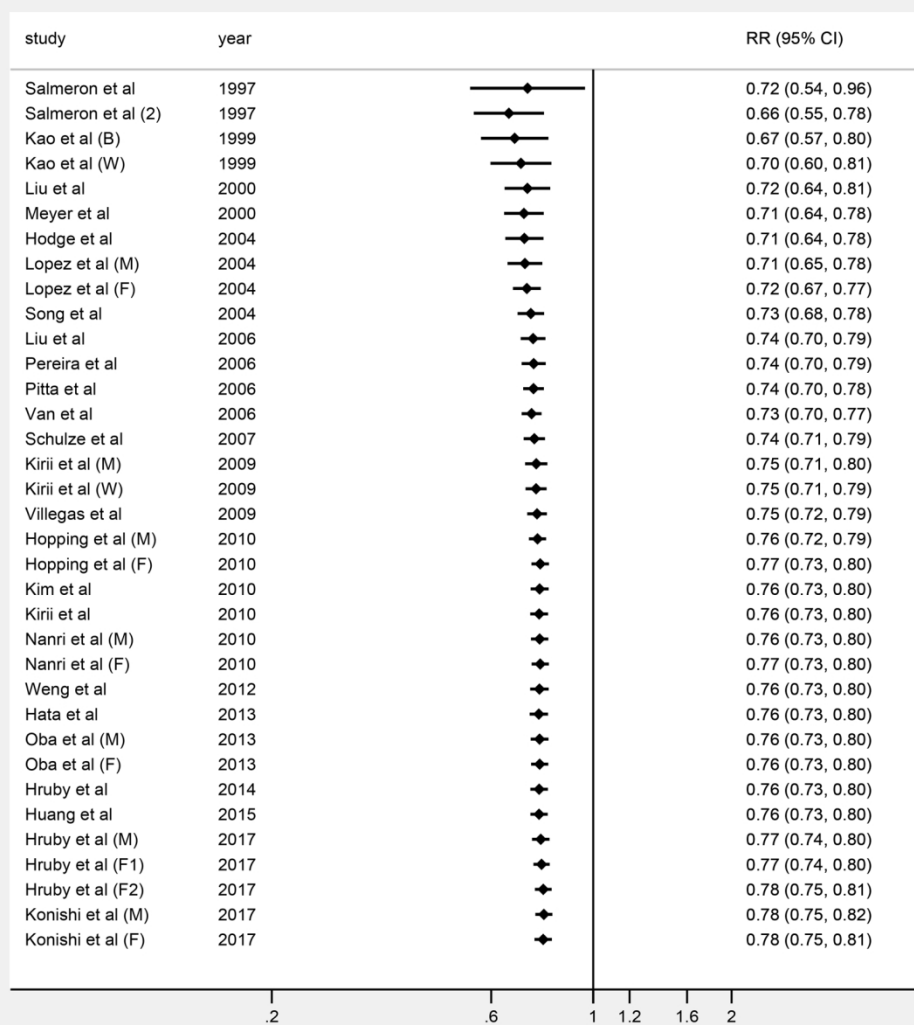

1  
2  
3  
4  
5  
6  
7  
8  
9  
10  
11  
12  
13  
14  
15  
16  
17  
18  
19  
20  
21  
22  
23  
24  
25  
26  
27  
28  
29  
30  
31  
32  
33  
34  
35  
36  
37  
38  
39  
40  
41  
42  
43  
44  
45  
46  
47  
48  
49  
50  
51  
52  
53  
54  
55  
56  
57  
58  
59  
60

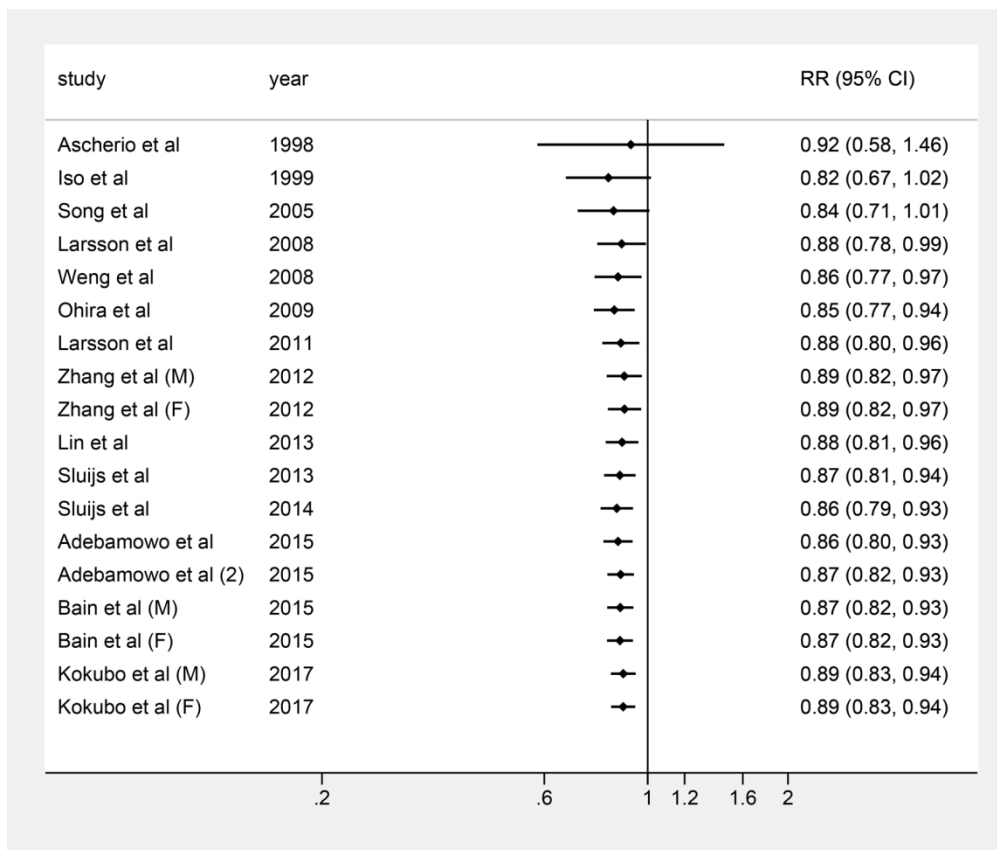



1  
2  
3  
4  
5  
6  
7  
8  
9  
10  
11  
12  
13  
14  
15  
16  
17  
18  
19  
20  
21  
22  
23  
24  
25  
26  
27  
28  
29  
30  
31  
32  
33  
34  
35  
36  
37  
38  
39  
40  
41  
42  
43  
44  
45  
46  
47  
48  
49  
50  
51  
52  
53  
54  
55  
56  
57  
58  
59  
60

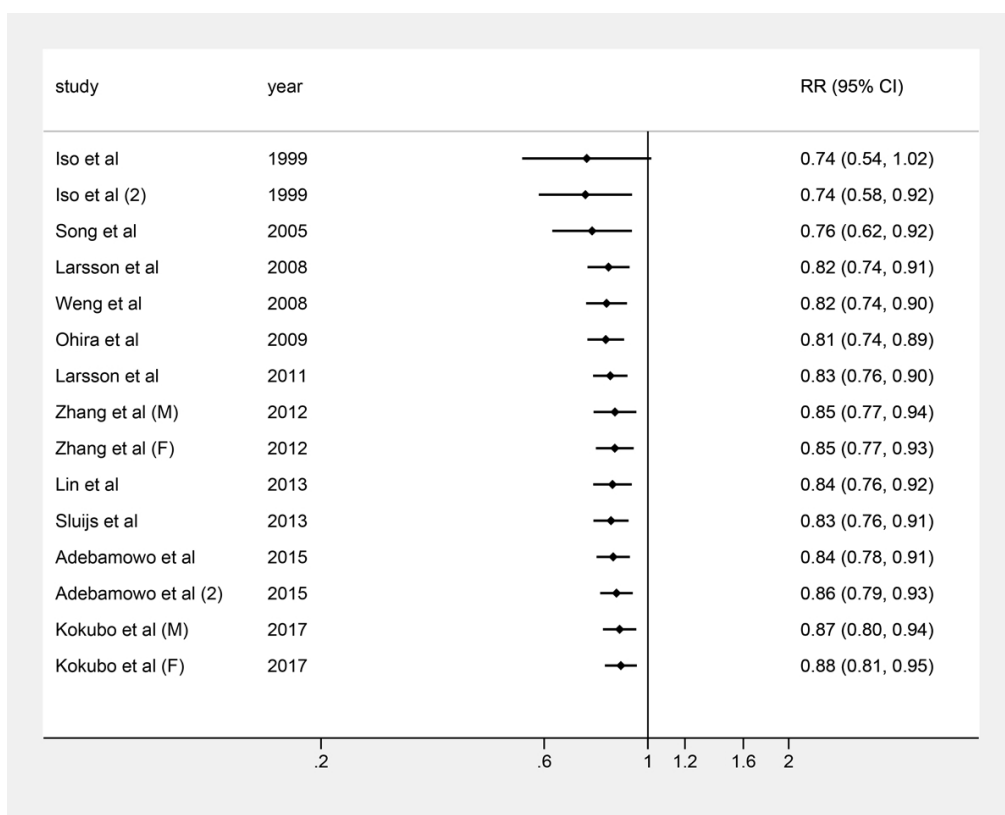

1  
2  
3  
4  
5  
6  
7  
8  
9  
10  
11  
12  
13  
14  
15  
16  
17  
18  
19  
20  
21  
22  
23  
24  
25  
26  
27  
28  
29  
30  
31  
32  
33  
34  
35  
36  
37  
38  
39  
40  
41  
42  
43  
44  
45  
46  
47  
48  
49  
50  
51  
52  
53  
54  
55  
56  
57  
58  
59  
60

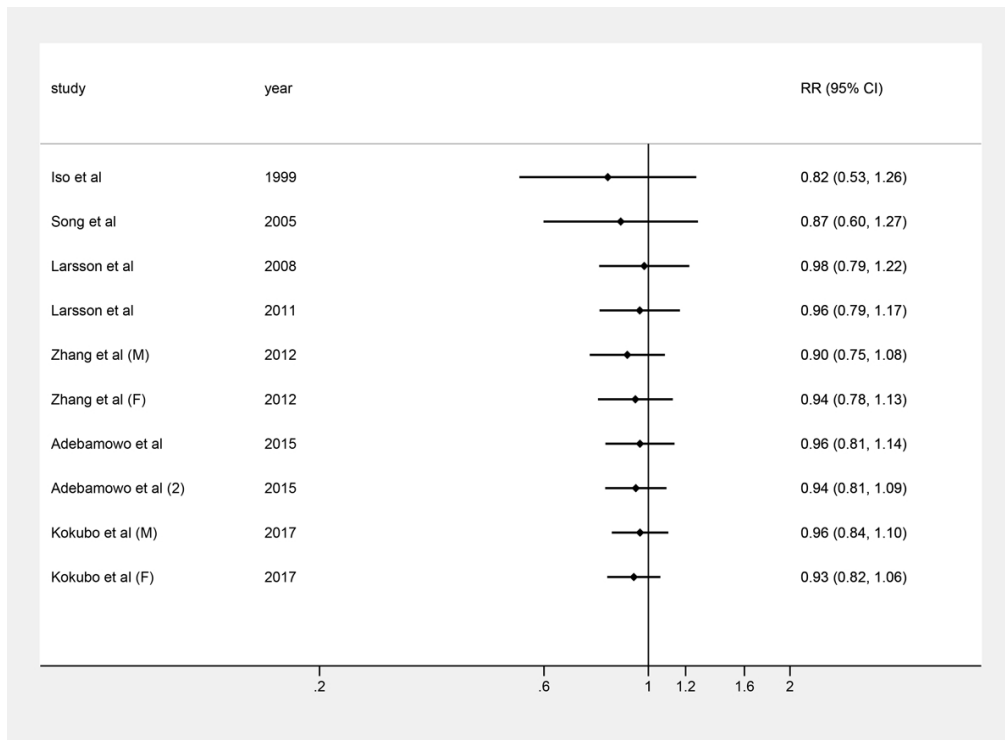

1  
2  
3  
4  
5  
6  
7  
8  
9  
10  
11  
12  
13  
14  
15  
16  
17  
18  
19  
20  
21  
22  
23  
24  
25  
26  
27  
28  
29  
30  
31  
32  
33  
34  
35  
36  
37  
38  
39  
40  
41  
42  
43  
44  
45  
46  
47  
48  
49  
50  
51  
52  
53  
54  
55  
56  
57  
58  
59  
60

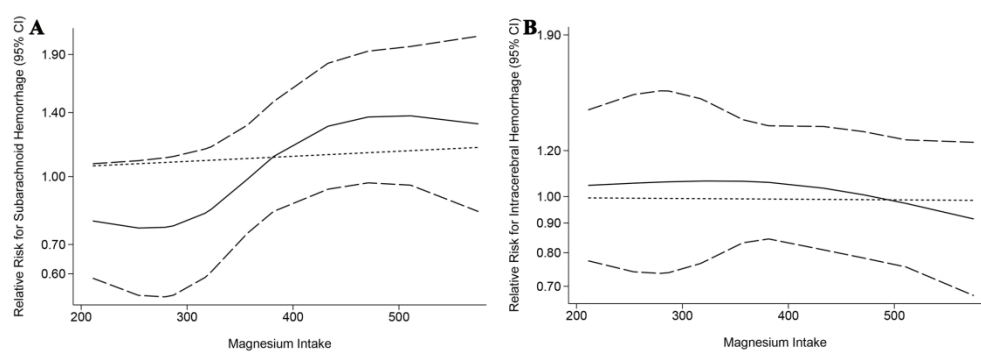

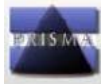

# Table S1 PRISMA 2009 Checklist

| Section/topic                      | #  | Checklist item                                                                                                                                                                                                                                                                                              | Reported on page # |
|------------------------------------|----|-------------------------------------------------------------------------------------------------------------------------------------------------------------------------------------------------------------------------------------------------------------------------------------------------------------|--------------------|
| <b>TITLE</b>                       |    |                                                                                                                                                                                                                                                                                                             | <b>1</b>           |
| Title                              | 1  | Identify the report as a systematic review, meta-analysis, or both.                                                                                                                                                                                                                                         | 1                  |
| <b>ABSTRACT</b>                    |    |                                                                                                                                                                                                                                                                                                             | <b>2-3</b>         |
| Structured summary                 | 2  | Provide a structured summary including, as applicable: background; objectives; data sources; study eligibility criteria, participants, and interventions; study appraisal and synthesis methods; results; limitations; conclusions and implications of key findings; systematic review registration number. | 2-3                |
| <b>INTRODUCTION</b>                |    |                                                                                                                                                                                                                                                                                                             | <b>4-5</b>         |
| Rationale                          | 3  | Describe the rationale for the review in the context of what is already known.                                                                                                                                                                                                                              | 4                  |
| Objectives                         | 4  | Provide an explicit statement of questions being addressed with reference to participants, interventions, comparisons, outcomes, and study design (PICOS).                                                                                                                                                  | 4-5                |
| <b>METHODS</b>                     |    |                                                                                                                                                                                                                                                                                                             | <b>5-9</b>         |
| Protocol and registration          | 5  | Indicate if a review protocol exists, if and where it can be accessed (e.g., Web address), and, if available, provide registration information including registration number.                                                                                                                               | 5                  |
| Eligibility criteria               | 6  | Specify study characteristics (e.g., PICOS, length of follow-up) and report characteristics (e.g., years considered, language, publication status) used as criteria for eligibility, giving rationale.                                                                                                      | 5-6                |
| Information sources                | 7  | Describe all information sources (e.g., databases with dates of coverage, contact with study authors to identify additional studies) in the search and date last searched.                                                                                                                                  | 5-6                |
| Search                             | 8  | Present full electronic search strategy for at least one database, including any limits used, such that it could be repeated.                                                                                                                                                                               | 5-6                |
| Study selection                    | 9  | State the process for selecting studies (i.e., screening, eligibility, included in systematic review, and, if applicable, included in the meta-analysis).                                                                                                                                                   | 5-6                |
| Data collection process            | 10 | Describe method of data extraction from reports (e.g., piloted forms, independently, in duplicate) and any processes for obtaining and confirming data from investigators.                                                                                                                                  | 6                  |
| Data items                         | 11 | List and define all variables for which data were sought (e.g., PICOS, funding sources) and any assumptions and simplifications made.                                                                                                                                                                       | 6                  |
| Risk of bias in individual studies | 12 | Describe methods used for assessing risk of bias of individual studies (including specification of whether this was done at the study or outcome level), and how this information is to be used in any data synthesis.                                                                                      | 6                  |
| Summary measures                   | 13 | State the principal summary measures (e.g., risk ratio, difference in means).                                                                                                                                                                                                                               | 6                  |
| Synthesis of results               | 14 | Describe the methods of handling data and combining results of studies, if done, including measures of consistency (e.g., $I^2$ ) for each meta-analysis.                                                                                                                                                   | 6-8                |

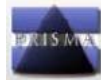

# Table S1 PRISMA 2009 Checklist

1  
2  
3  
4  
5  
6  
7  
8  
9  
10  
11  
12  
13  
14  
15  
16  
17  
18  
19  
20  
21  
22  
23  
24  
25  
26  
27  
28  
29  
30  
31  
32  
33  
34  
35  
36  
37  
38  
39  
40  
41  
42  
43  
44  
45  
46  
47

| Section/topic                 | #  | Checklist item                                                                                                                                                                                           | Reported on page # |
|-------------------------------|----|----------------------------------------------------------------------------------------------------------------------------------------------------------------------------------------------------------|--------------------|
| Risk of bias across studies   | 15 | Specify any assessment of risk of bias that may affect the cumulative evidence (e.g., publication bias, selective reporting within studies).                                                             | 7                  |
| Additional analyses           | 16 | Describe methods of additional analyses (e.g., sensitivity or subgroup analyses, meta-regression), if done, indicating which were pre-specified.                                                         | 8-9                |
| <b>RESULTS</b>                |    |                                                                                                                                                                                                          | <b>9-16</b>        |
| Study selection               | 17 | Give numbers of studies screened, assessed for eligibility, and included in the review, with reasons for exclusions at each stage, ideally with a flow diagram.                                          | 9                  |
| Study characteristics         | 18 | For each study, present characteristics for which data were extracted (e.g., study size, PICOS, follow-up period) and provide the citations.                                                             | 9-10               |
| Risk of bias within studies   | 19 | Present data on risk of bias of each study and, if available, any outcome level assessment (see item 12).                                                                                                | 9-10               |
| Results of individual studies | 20 | For all outcomes considered (benefits or harms), present, for each study: (a) simple summary data for each intervention group (b) effect estimates and confidence intervals, ideally with a forest plot. | 10-16              |
| Synthesis of results          | 21 | Present results of each meta-analysis done, including confidence intervals and measures of consistency.                                                                                                  | 10-16              |
| Risk of bias across studies   | 22 | Present results of any assessment of risk of bias across studies (see Item 15).                                                                                                                          | 10-16              |
| Additional analysis           | 23 | Give results of additional analyses, if done (e.g., sensitivity or subgroup analyses, meta-regression [see Item 16]).                                                                                    | 10-16              |
| <b>DISCUSSION</b>             |    |                                                                                                                                                                                                          | <b>16-22</b>       |
| Summary of evidence           | 24 | Summarize the main findings including the strength of evidence for each main outcome; consider their relevance to key groups (e.g., healthcare providers, users, and policy makers).                     | 16-21              |
| Limitations                   | 25 | Discuss limitations at study and outcome level (e.g., risk of bias), and at review-level (e.g., incomplete retrieval of identified research, reporting bias).                                            | 21-22              |
| Conclusions                   | 26 | Provide a general interpretation of the results in the context of other evidence, and implications for future research.                                                                                  | 22                 |
| <b>FUNDING</b>                |    |                                                                                                                                                                                                          | <b>23</b>          |
| Funding                       | 27 | Describe sources of funding for the systematic review and other support (e.g., supply of data); role of funders for the systematic review.                                                               | 23                 |

From: Moher D, Liberati A, Tetzlaff J, Altman DG, The PRISMA Group (2009). Preferred Reporting Items for Systematic Reviews and Meta-Analyses: The PRISMA Statement. PLoS Med 6(7): e1000097. doi:10.1371/journal.pmed1000097

For more information, visit: [www.prisma-statement.org](http://www.prisma-statement.org).

# BMJ Open

## Magnesium intake has inverse association with type 2 diabetes and total stroke: an updated systematic review and meta-analysis

|                                 |                                                                                                                                                                                                                                                                                                                                                                                                                                                                                                                                                                                                                                                                                                                                                                                                                                                                                                                                                                                         |
|---------------------------------|-----------------------------------------------------------------------------------------------------------------------------------------------------------------------------------------------------------------------------------------------------------------------------------------------------------------------------------------------------------------------------------------------------------------------------------------------------------------------------------------------------------------------------------------------------------------------------------------------------------------------------------------------------------------------------------------------------------------------------------------------------------------------------------------------------------------------------------------------------------------------------------------------------------------------------------------------------------------------------------------|
| Journal:                        | <i>BMJ Open</i>                                                                                                                                                                                                                                                                                                                                                                                                                                                                                                                                                                                                                                                                                                                                                                                                                                                                                                                                                                         |
| Manuscript ID                   | bmjopen-2019-032240.R1                                                                                                                                                                                                                                                                                                                                                                                                                                                                                                                                                                                                                                                                                                                                                                                                                                                                                                                                                                  |
| Article Type:                   | Original research                                                                                                                                                                                                                                                                                                                                                                                                                                                                                                                                                                                                                                                                                                                                                                                                                                                                                                                                                                       |
| Date Submitted by the Author:   | 19-Nov-2019                                                                                                                                                                                                                                                                                                                                                                                                                                                                                                                                                                                                                                                                                                                                                                                                                                                                                                                                                                             |
| Complete List of Authors:       | Zhao, Binghao; The Second Affiliated Hospital of Nanchang University, Department of Cardio-Thoracic Surgery<br>Zeng, Lianli; The second affiliated hospital of Nanchang University, Department of Cardiovascular Medicine<br>Zhao, Jiani; The second affiliated hospital of Nanchang University, Department of Cardiovascular Medicine<br>Wu, Qian; The second affiliated hospital of Nanchang University, Department of Cardiovascular Medicine<br>Dong, Yifei; The second affiliated hospital of Nanchang University, Department of Cardiovascular Medicine<br>Zou, Fang; The second affiliated hospital of Nanchang University, Department of Endocrinology<br>Gan, Li; The second affiliated hospital of Nanchang University, Department of Neurology<br>Wei, Yiping; The Second Affiliated Hospital of Nanchang University, Department of Cardio-Thoracic Surgery<br>Zhang, Wenxiong; The Second Affiliated Hospital of Nanchang University, Department of Cardio-Thoracic Surgery |
| <b>Primary Subject Heading</b>: | Nutrition and metabolism                                                                                                                                                                                                                                                                                                                                                                                                                                                                                                                                                                                                                                                                                                                                                                                                                                                                                                                                                                |
| Secondary Subject Heading:      | Diabetes and endocrinology, Epidemiology, Evidence based practice, Neurology, Cardiovascular medicine                                                                                                                                                                                                                                                                                                                                                                                                                                                                                                                                                                                                                                                                                                                                                                                                                                                                                   |
| Keywords:                       | Magnesium Intake, Type 2 Diabetes, Stroke < NEUROLOGY, Meta-Analysis                                                                                                                                                                                                                                                                                                                                                                                                                                                                                                                                                                                                                                                                                                                                                                                                                                                                                                                    |
|                                 |                                                                                                                                                                                                                                                                                                                                                                                                                                                                                                                                                                                                                                                                                                                                                                                                                                                                                                                                                                                         |

SCHOLARONE™  
Manuscripts

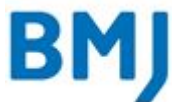

I, the Submitting Author has the right to grant and does grant on behalf of all authors of the Work (as defined in the below author licence), an exclusive licence and/or a non-exclusive licence for contributions from authors who are: i) UK Crown employees; ii) where BMJ has agreed a CC-BY licence shall apply, and/or iii) in accordance with the terms applicable for US Federal Government officers or employees acting as part of their official duties; on a worldwide, perpetual, irrevocable, royalty-free basis to BMJ Publishing Group Ltd ("BMJ") its licensees and where the relevant Journal is co-owned by BMJ to the co-owners of the Journal, to publish the Work in this journal and any other BMJ products and to exploit all rights, as set out in our [licence](#).

The Submitting Author accepts and understands that any supply made under these terms is made by BMJ to the Submitting Author unless you are acting as an employee on behalf of your employer or a postgraduate student of an affiliated institution which is paying any applicable article publishing charge ("APC") for Open Access articles. Where the Submitting Author wishes to make the Work available on an Open Access basis (and intends to pay the relevant APC), the terms of reuse of such Open Access shall be governed by a Creative Commons licence – details of these licences and which [Creative Commons](#) licence will apply to this Work are set out in our licence referred to above.

Other than as permitted in any relevant BMJ Author's Self Archiving Policies, I confirm this Work has not been accepted for publication elsewhere, is not being considered for publication elsewhere and does not duplicate material already published. I confirm all authors consent to publication of this Work and authorise the granting of this licence.

1 **Magnesium intake has inverse association with type 2 diabetes and total stroke:**  
2 **an updated systematic review and meta-analysis**

3 Binghao Zhao<sup>1,2</sup>; Lianli Zeng<sup>3,4</sup>; Jiani Zhao<sup>3,4</sup>; Qian Wu<sup>3,4</sup>; Yifei Dong<sup>3</sup>; Fang Zou<sup>5</sup>;  
4 Li Gan<sup>6</sup>; Yiping Wei<sup>1</sup>; Wenxiong Zhang<sup>1</sup>.

5 **Affiliations**

6 <sup>1</sup>Department of Cardio-Thoracic Surgery, The Second Affiliated Hospital of  
7 Nanchang University, Nanchang, China, 330006.

8 <sup>2</sup>Departments of Neurosurgery, Peking Union Medical College Hospital, Chinese  
9 Academy of Medical Sciences and Peking Union Medical College, Beijing, China,  
10 100000.

11 <sup>3</sup>Department of Cardiovascular Medicine, The Second Affiliated Hospital of  
12 Nanchang University, Nanchang, China, 330006.

13 <sup>4</sup>Jiangxi medical college, Nanchang University, 330006, Nanchang, China

14 <sup>5</sup>Department of Endocrinology, The Second Affiliated Hospital of Nanchang  
15 University, Nanchang, China, 330006.

16 <sup>6</sup>Department of Neurology, The Second Affiliated Hospital of Nanchang University,  
17 China, 330006.

18 **Corresponding Author:** Wenxiong Zhang, MD, Department of Cardio-Thoracic  
19 Surgery, The Second Affiliated Hospital of Nanchang University, 1 Minde Road,  
20 Nanchang, China, 330006; E-mail: [zwx123dr@126.com](mailto:zwx123dr@126.com); Phone: +8618720909414;  
21 Fax: 0791-86133161.

22 **Short running head:** Magnesium Intake Reduces Diabetes and Total Stroke.

23 **Word count:** 4971.



1  
2  
3  
4 **Abstract**

5  
6 **Objective:** The detailed associations between type 2 diabetes (T2D) and total stroke  
7  
8  
9  
10 and magnesium intake as well as the dose-response manner should be timely updated.

11  
12 **Design:** Systematic review search, methodology and meta-analyses.

13  
14 **Data sources:** PubMed, EMBASE, Cochrane Library, Web of Science and  
15  
16  
17  
18  
19 ClinicalTrials.gov were rigorously searched from the inception to March 15, 2019.

20  
21 **Eligibility criteria:** Prospective cohort studies about the two diseases

22  
23  
24  
25  
26  
27  
28 **Data synthesis:** Relative risk (RR) and 95% confidence intervals (95% CI) in  
29  
30  
31  
32  
33 random-effects models as well as absolute risk (AR) were pooled to calculate risk on  
34  
35  
36  
37 T2D and stroke. Methodological quality was assessed by the Newcastle-Ottawa Scale.

38  
39  
40  
41  
42  
43  
44  
45  
46  
47  
48  
49  
50  
51  
52  
53  
54  
55  
56  
57  
58  
59  
60  
**Results:** Forty-one studies involving 53 cohorts were included. The magnitude of the  
risk was significantly reduced by 22% for T2D (RR, 0.78 [95% CI, 0.75-0.81];  $P <$   
0.001; AR reduction, 0.120%), 11% for total stroke (RR, 0.89 [95% CI, 0.83-0.94];  $P <$   
0.001; AR reduction, 0.281%), and 12% for ischemic stroke (RR, 0.88 [95% CI,  
0.81-0.95];  $P = 0.001$ ; AR reduction, 0.246%) comparing the highest magnesium  
intake to the lowest. The inverse association still existed when studies on T2D were  
adjusted for cereal fiber (RR, 0.79 [95% CI, 0.73-0.85];  $P < 0.001$ ) and those on total  
stroke were adjusted for calcium (RR, 0.89 [95% CI, 0.80-0.99];  $P = 0.040$ ).  
Subgroup analyses suggested risk for total and ischemic stroke was significantly  
decreased in females, participants with  $\geq 25$  mg/m<sup>2</sup> body mass index, and those with  $\geq$   
12y follow-up, the reduced risk in Asia was not so conspicuous as in North America  
and Europe.

1  
2  
3  
4 46 **Conclusions:** Magnesium intake has significantly inverse associations with T2D and  
5  
6 47 total stroke in a dose-dependent manner. Feasible magnesium-rich dietary pattern  
7  
8  
9 48 may highly benefit specific populations, and can be highlighted in the primary  
10  
11  
12 49 prevention of T2D and total stroke by the public.

13  
14 50 PROSPERO registration number CRD42018092690  
15  
16

17 51

### 18 19 52 **Strengths and limitations of this study**

- 20  
21  
22 53 1. An inverse association between magnesium intake and T2D and stroke is  
23  
24 54 established.  
25  
26 55 2. Magnesium-rich food consumption may be recommended for high-risk individuals  
27  
28 56 in dietary guidelines.  
29  
30 57 3. Considerable evidence assists with innovation of the global dietary pattern.  
31  
32 58 4. Event ascertainment is limited by FFQ or self-reports.  
33  
34 59 5. More individual-level studies are required for reducing potential bias.  
35  
36

37 60

38  
39  
40 61 **Keywords:** Magnesium Intake; Type 2 Diabetes; Stroke; Meta-Analysis.  
41  
42  
43  
44  
45  
46  
47  
48  
49  
50  
51  
52  
53  
54  
55  
56  
57  
58  
59  
60

## 62 **Introduction**

63 Diabetes is a global burden with an alarming increasing rate throughout the world<sup>1,2</sup>.  
64 Stroke is an independent disorder and a typical macrovascular complication of type 2  
65 diabetes (T2D) treated as the second leading cause of death after ischemic heart  
66 disease<sup>3,4</sup>. These pandemic health problems require more primary prevention  
67 strategies.

68 Magnesium, common cellular ion, acts as critical cofactor for hundreds of  
69 enzymes involved in glucose metabolism, protein production, and nucleic acid  
70 synthesis<sup>5,6</sup>. Low levels of magnesium have been associated with many chronic and  
71 inflammatory diseases, such as Alzheimer's disease, asthma, attention deficit  
72 hyperactivity disorder, insulin resistance, T2D, hypertension, cardiovascular disease  
73 (e.g., stroke), migraine headaches, osteoporosis and cancer<sup>1,5,7,8</sup>.

74 Actually, many adults in developed countries do not successfully meet the  
75 recommended daily consumption of magnesium-rich foods such as whole grains, nuts,  
76 and green leafy vegetables, and magnesium is less mentioned in dietary guidelines  
77 and in studies about T2D or stroke prevention<sup>9,10</sup>. With this regard, we chose T2D and  
78 stroke as our outcome of interest (cardiovascular disease (CVD) was not elaborated  
79 because there are so many items relating to CVD and the definitions about CVD  
80 varied a lot among searched studies, which would enhance heterogeneity in the pooled  
81 process and impair our interpretation of the final conclusion). And, emerging  
82 studies<sup>11-51</sup> on this topic are limited, and the results still remain mixed, for example,  
83 most of the studies support magnesium intake has inverse association with T2D or

1  
2  
3  
4 84 total stroke incidence, however, several studies reveal there is an inverse trend but not  
5  
6 85 significant association, which possibly due to the limitations of small sample sizes and  
7  
8  
9 86 differences in intervention duration, study design, characteristics of participants.  
10  
11 87 Moreover, consecutive meta-analyses<sup>52,53</sup> have used less rigorous inclusion, the results  
12  
13  
14 88 were incomprehensive, and they did not completely address the influence of other  
15  
16  
17 89 confounders (i.e., body mass index (BMI), cereal fiber, calcium, potassium) on the  
18  
19  
20 90 relationship. Accordingly, we performed a meta-analysis to (1) establish a  
21  
22 91 comprehensive estimate and update the epidemiological evidence for clinical practice;  
23  
24  
25 92 (2) discuss the results of stroke subtype and the impact of several statistical and  
26  
27 93 epidemiology confounders on the investigated association; and (3) highlight a detailed  
28  
29  
30 94 dose-response pattern for the participants in the studies analyzed.  
31  
32  
33  
34

## 35 96 **Methods**

36  
37  
38 97 This study was reported according to the Preferred Reporting Items for Systematic  
39  
40 98 Reviews and Meta-Analyses (PRISMA) guidelines (**Table S1**) and the Meta-analysis  
41  
42 99 of Observational Studies in Epidemiology (MOOSE) Guidelines Checklist (**Table S2**)  
43  
44  
45 100 (Registration information: PROSPERO CRD42018092690).  
46  
47  
48  
49

101

## 102 102 **Search Strategy**

103 103 PubMed, EMBASE, Cochrane Library, Web of Science and ClinicalTrials.gov were  
104 104 systematically reviewed through inception to March 15, 2019 for studies about  
105 105 magnesium intake and T2D or stroke without language restrictions. The following key  
106

1  
2  
3  
4 106 words were used: “Magnesium”, “Type 2 Diabetes Mellitus”, “Type 2 Diabetes”,  
5  
6 107 “Stroke”, “Cerebrovascular Stroke”, “Cohort Studies”, and “Prospective Studies”. We  
7  
8  
9 108 also manually searched the reference lists of the retrieved literature (including  
10  
11 109 meta-analyses and brief reports), bibliographies and gray literature (including  
12  
13  
14 110 presentations and unpublished literature) for further eligible articles. The search  
15  
16  
17 111 strategy could be found in **Table S3**.

### 112 113 **Selection Criteria**

114 (1) Eligible populations must be composed of individuals with plausible  
115 dietary/energy intake, who had no history of diabetes and/or insulin treatment for T2D  
116 analysis and no current stroke for stroke analysis. (2) Their apparent life expectancy  
117 was long enough for proper follow-up. (3) We only included prospective cohort  
118 studies that reported magnesium intake and T2D and/or various types of stroke. (4)  
119 Follow-up duration of eligible studies should not be less than one year if they  
120 provided the follow-up data. Notably, magnesium intake contained dietary  
121 magnesium intake and total magnesium intake (dietary and supplementary  
122 magnesium).

123 Only studies containing the most comprehensive information on the population  
124 or endpoints were included to avoid duplication. We excluded reviews, basic studies,  
125 meta-analyses, studies on gestational diabetes mellitus (GDM) or studies only  
126 focusing on magnesium supplementation.

127

## 128 **Data Extraction and Quality Assessments**

129 Two researchers independently extracted the following information: the first author,  
130 publication year, period of cohort studies, duration of persistent exposure, basic  
131 characteristics of the enrolled participants (weight, age, region, BMI, drinking and  
132 smoking habits (previous plus current), etc.), median magnesium intake for each  
133 quantile (tertile, quartile, or quintile), diabetes and total stroke cases, subtypes of total  
134 stroke, dietary and case assessments, adjusted confounding covariates. Importantly,  
135 total stroke is classified as clinical ischemic stroke (87%), hemorrhagic stroke (13%)  
136 and undetermined stroke<sup>54</sup>. Hemorrhagic stroke is classified as subarachnoid  
137 hemorrhage and intracerebral hemorrhage according to anatomical site or presumed  
138 etiology<sup>55</sup>. In cases of continuing disagreement, a final decision was reached after  
139 discussion with a third member of the panel.

140 Methodological quality was described by the Newcastle-Ottawa Scale (NOS),  
141 which was validated for assessment of the quality of nonrandomized controlled trials  
142 in meta-analyses<sup>56</sup>. As for 0-10 scale, each study was categorized as low (0-5),  
143 medium (6-7), of high (8-10) quality.

## 145 **Statistical Analysis**

146 Articles providing data separately for men and women or black and white or different  
147 types of disease within an article were treated as independent studies. Multivariate  
148 relative risk (RR) and corresponding 95% confidence intervals (CI) as well as  
149 absolute risk (AR) for measuring the quantitative associations between exposure and

1  
2  
3  
4 150 T2D, total stroke and other wanted outcomes, particularly for the highest vs. the  
5  
6  
7 151 lowest categories of magnesium intake were estimated by DerSimonian-Laird random  
8  
9 152 effects model because the assumptions involved account for the presence of  
10  
11 153 within-study and between-study variability. Statistical heterogeneity was determined  
12  
13  
14 154 with the Cochran Q chi-square test and the  $I^2$ . An  $I^2 > 50\%$  or a  $P$  value for the Q test  
15  
16  
17 155  $< 0.1$  was considered to indicate significant heterogeneity<sup>57</sup>. We performed sensitivity  
18  
19  
20 156 analyses to test the robustness and post-subgroup analyses to detect source of  
21  
22 157 heterogeneity. In addition, a random-effects meta-regression analysis on BMI, sex,  
23  
24 158 participants region, and dietary assessments with RR for each trial was performed to  
25  
26  
27 159 obtain an understanding of the reasons for heterogeneity. RR and 95% CI might begin  
28  
29  
30 160 to significantly change as publication years increased in T2D and total stroke etc.,  
31  
32  
33 161 which would be validated by cumulative meta-analyses.

34  
35 162 The dose-response analyses for all outcomes were proposed by Greenland and  
36  
37 163 Longnecker<sup>58</sup> and Orsini<sup>59</sup> et al. The categories of magnesium intake, distributions of  
38  
39  
40 164 cases and person-year, RR and 95 CI were extracted. Once the number of cases and/or  
41  
42  
43 165 person-years was not available, variance-weighted least squares regression was used  
44  
45  
46 166 to pool the risk estimate. For most studies, the median intake for each quantile (tertile,  
47  
48 167 quartile or quintile) of magnesium intake was assigned as the representative dose. For  
49  
50  
51 168 continuous intake reported as category data with a range in some studies, we assigned  
52  
53  
54 169 the mid-point category of the lower and upper bound to the RR in these studies; when  
55  
56 170 the highest category was open ended, we assumed the length of the open ended  
57  
58  
59 171 interval to be 1.5 times as the adjacent interval; when the lowest category was open,  
60

1  
2  
3  
4 172 we assigned the adjacent interval of the category to be 1.5 times as the length of the  
5  
6  
7 173 open ended interval. We determined generalized least squares regression models to  
8  
9  
10 174 calculate study-specific RR estimates per 50 mg/day, 100 mg/day, and 150 mg/day of  
11  
12 175 magnesium intake increment if there was evidence for linear relationships. In addition,  
13  
14 176 the non-linear relationships between magnesium intake and all outcomes were  
15  
16  
17 177 evaluated using restricted cubic splines with four knots located at the 5<sup>th</sup>, 35<sup>th</sup>, 65<sup>th</sup>,  
18  
19 178 and 95<sup>th</sup> percentiles of the distribution. The P value for curve linearity or non-linearity  
20  
21  
22 179 was calculated by testing the null hypothesis that the coefficient of the second spline  
23  
24  
25 180 is equal to zero. All results were presented using two-stage dose-response model plots  
26  
27  
28 181 (including linear and nonlinear relationships).Some results were demonstrated in  
29  
30 182 forest plots for < 50 mg/day, ≥ 50 and < 100 mg/day, ≥ 100 and < 150 mg/day, ≥ 150  
31  
32  
33 183 mg/day increments.

34  
35 184 Publication bias was assessed graphically by Begg's adjusted rank correlation  
36  
37  
38 185 funnel plots<sup>60</sup> and Egger's linear regression tests<sup>61</sup>. All analyses were performed using  
39  
40  
41 186 Stata version 14.0 (StataCorp, College Station, TX, USA); two-sided  $P < 0.05$  was  
42  
43  
44 187 considered statistically significant except where otherwise specified.

45  
46 188

### 47 48 189 **Patient and Public Involvement**

49  
50  
51 190 No patients were involved in setting the research question or the outcome measures,  
52  
53  
54 191 and no patients were involved in developing plans for design or implementation of the  
55  
56  
57 192 study. Furthermore, no patients were asked to advice on interpretation or writing up of  
58  
59  
60 193 results. Since this study used aggregated data from previous publications, it is not easy



1  
2  
3  
4 194 to disseminate the results of the research to study participants directly.  
5  
6  
7 195

## 8 9 196 **Results**

### 10 11 12 197 **Study Characteristics and Quality Assessment**

13  
14 198 Of the total 8713 studies, 107 studies were considered for eligibility after screening of  
15  
16  
17 199 titles and abstracts (**Figure 1**). And a total of 41<sup>11-51</sup> prospective cohort studies  
18  
19  
20 200 involving 53 cohorts, 1 912 634 participants and 76 678 cases were eligible for  
21  
22 201 current systematic review and meta-analysis (**Table S4**). Hodge et al<sup>18</sup> only recorded  
23  
24  
25 202 500 mg/day increment of magnesium for further pooled analyses; 2 studies<sup>33,51</sup> failed  
26  
27 203 to clearly distinguish the diabetes type, but the great majority of cases had T2D. We  
28  
29  
30 204 computed the subtype data in three studies<sup>14,27,36</sup> after the extraction of total stroke,  
31  
32  
33 205 and we considered ischemic stroke in three other studies<sup>28,30,42</sup> as total stroke given  
34  
35 206 ischemic stroke accounting for nearly 87% of total stroke. Participants were  
36  
37  
38 207 predominately middle-age at baseline, with mean magnesium intake for the highest  
39  
40  
41 208 category of 370 mg/day, mean for the lowest category of 232 mg/day. The mean  
42  
43 209 duration of all eligible studies was 10.7 years. Nineteen studies were conducted in  
44  
45  
46 210 North America (America); 5 studies were in Europe (Sweden, the Netherlands and  
47  
48 211 Britain); 13 studies in Asia (China and Japan and Taipei); 4 studies enrolled  
49  
50  
51 212 individuals in multiple nations. Most of the studies included used food frequency  
52  
53 213 questionnaires (FFQs) or semi-quantitative FFQs (SFFQs) to assess individual dietary  
54  
55  
56 214 intake. Eighteen studies used dietary magnesium intake, and 21 studies recorded total  
57  
58  
59 215 magnesium intake (dietary and supplementary magnesium intake). Of note,  
60

1  
2  
3  
4 216 supplementary magnesium intake was assessed from the use of magnesium or  
5  
6  
7 217 multivitamin supplements; nevertheless, dietary magnesium accounted for the  
8  
9 218 majority of magnesium intake. Adjusted confounders were mostly similar; however,  
10  
11  
12 219 adjusted dietary confounders such as cereal fiber, potassium, and calcium still varied  
13  
14  
15 220 across individual studies. It was unclear whether included studies had adjusted for  
16  
17 221 sodium because they did not provide the information. All these studies were written in  
18  
19  
20 222 English.

21  
22 223 After the quality assessments of the studies according to NOS, the average score was  
23  
24  
25 224 8.85 (**Table S5**) and all studies were of high quality (NOS score 8-10).  
26

## 27 28 29 30 226 **Magnesium Intake and T2D Incidence**

31  
32 227 Thirty-five cohorts from 26 publications<sup>11,12,15,20,22-26,29,31-35,37,39,41,43,48,49,51</sup>(1 219 636  
33  
34  
35 228 participants and 56 540 T2D cases) reported the magnitude of the risk of T2D was  
36  
37  
38 229 reduced by 22% (RR, 0.78 [95% CI, 0.75-0.81];  $P < 0.001$ ; AR reduction, 0.120%)  
39  
40  
41 230 comparing the highest category of magnesium intake to the lowest with a little  
42  
43 231 evidence of heterogeneity ( $I^2 = 35.6%$ ;  $P = 0.021$ ). The dose category-specific  
44  
45 232 analysis suggested that for  $< 50$  mg/day magnesium increment, the risk of T2D was  
46  
47  
48 233 reduced by 10% (RR, 0.90 [95% CI, 0.88-0.93];  $P < 0.001$ ); for  $\geq 50$  and  $< 100$   
49  
50  
51 234 mg/day, the risk was decreased by 16% (RR, 0.84 [95% CI, 0.82-0.87];  $P < 0.001$ );  
52  
53  
54 235 for  $\geq 100$  and  $< 150$  mg/day, the risk was reduced by 22% (RR, 0.78 [95% CI,  
55  
56 236 0.74-0.83];  $P < 0.001$ ); and for  $\geq 150$  mg/day, the risk was reduced by 21% (RR, 0.79  
57  
58 237 [95% CI, 0.74-0.84];  $P < 0.001$ ) (**Figure 2**). Little evidence of publication bias was  
59  
60

1  
2  
3  
4 238 found (Egger's test:  $P = 0.088$ ) (**Figure S1A**).

5  
6  
7 239

#### 8 9 240 **Magnesium Intake and Stroke Incidence**

10  
11  
12 241 Eighteen cohorts from 15 publications<sup>13,14,21,27,28,30,36,38,40,42,44-47,50</sup> (692 998

13  
14 242 participants and 20 138 total stroke cases) reported the magnitude of the risk of total

15  
16  
17 243 stroke was decreased by 11% (RR, 0.89 [95% CI, 0.83-0.94];  $P < 0.001$ ; AR

18  
19  
20 244 reduction, 0.281%) with no heterogeneity ( $I^2 = 0\%$ ;  $P = 0.529$ ) in the highest category

21  
22 245 of magnesium intake VS. the lowest. Dose category-specific analysis identified no

23  
24 246 significant association with the  $< 50$  mg/day,  $\geq 50$  and  $< 100$  mg/day, or  $\geq 100$  and  $<$

25  
26  
27 247 150 mg/day of increments. For the  $\geq 150$  mg/day increment, the risk of total stroke

28  
29  
30 248 was decreased by 15% (RR, 0.85 [95% CI, 0.79-0.91];  $P < 0.001$ ) (**Figure S2**).

31  
32  
33 249 Publication bias was evaluated for stroke subtypes respectively.

34  
35 250 Fifteen cohorts from 12 publications<sup>14,21,27,28,30,36,38,40,42,45,46,50</sup> reported ischemic

36  
37  
38 251 stroke. The magnitude of the risk of ischemic stroke was reduced by 12% (RR, 0.88

39  
40  
41 252 [95% CI, 0.81-0.95];  $P = 0.001$ ; AR reduction, 0.246%) with no significant

42  
43 253 heterogeneity ( $I^2 = 16.9\%$ ;  $P = 0.265$ ). Dose category-specific analysis identified no

44  
45  
46 254 significant association with the  $< 50$  mg/day,  $\geq 50$  and  $< 100$  mg/day, or  $\geq 100$  and  $<$

47  
48  
49 255 150 mg/day increments. A trend to decrease existed but remained insignificant. The

50  
51 256 original risk was reduced by 16% in the analysis of the  $\geq 150$  mg/day increment (RR,

52  
53  
54 257 0.84 [95% CI, 0.78-0.91];  $P < 0.001$ ) (**Figure S3**). No publication bias was observed

55  
56  
57 258 in terms of ischemic stroke (Egger's test:  $P = 0.937$ ) (**Figure S1B**).

58  
59 259 Ten cohorts from 8 studies<sup>14,21,27,36,38,45,46,50</sup> reported that hemorrhagic stroke was

60

1  
2  
3  
4 260 not significantly associated with magnesium intake (RR, 0.93 [95% CI, 0.82-1.06];  $P$   
5  
6 261 = 0.282). Dose category-specific analysis identified no significant association (**Figure**  
7  
8  
9 262 **S4**). No significant heterogeneity or publication bias were identified with regard to  
10  
11 263 hemorrhagic stroke (Egger's test:  $P = 0.809$ ) (**Figure S1C**).

12  
13  
14 264 Three publications involving 3 cohorts<sup>14,27,36</sup> showed that high magnesium intake  
15  
16 265 had no significant efficacy in reducing subarachnoid hemorrhage risk (RR, 0.99 [95%  
17  
18 266 CI, 0.71-1.39];  $P = 0.963$ ). Dose category-specific analysis identified no significant  
19  
20 267 association (**Figure S5**).

21  
22  
23  
24 268 With respect to intracerebral hemorrhage, the pooled results from 3 cohorts<sup>14,27,36</sup>  
25  
26 269 in 3 publications revealed no significant advantages of intracerebral hemorrhage (RR,  
27  
28 270 0.92 [95% CI, 0.71-1.20];  $P = 0.540$ ). Dose category-specific analysis identified no  
29  
30 271 significant association (**Figure S6**).

### 272 273 **Meta-Regression and Cumulative Meta-Analysis**

274  
275 274 Meta-regression identified no evidence of BMI, sex, participant region and dietary  
276  
277 275 assessment for each individual trial bias in T2D (**Figure S7**), total stroke (**Figure S8**),  
278  
279 276 ischemic stroke (**Figure S9**) and hemorrhagic stroke events (**Figure S10**). The male  
280  
281 277 subgroup ( $P = 0.041$ ) in the sex category might cast little heterogeneity on total stroke;  
282  
283 278 however, the sex category ( $P = 0.112$ ) had no association with total stroke incidence.

284  
285 279 Analyses on T2D (**Figure S11**), total stroke (**Figure S12**) and ischemic stroke  
286  
287 280 demonstrated that the RRs of the final results became robust within a narrow range  
288  
289 281 and remained significant as publication years increased and as recent high quality  
290  
291 282

1  
2  
3  
4 282 studies were included. After inclusion of the Iso et al<sup>14</sup> study, the RR and 95% CI for  
5  
6 283 ischemic stroke decreased to less than 1 and became stable (**Figure S13**). Although  
7  
8  
9 284 there was no significantly reduced risk in hemorrhagic stroke, clear evidence showed  
10  
11 285 that the confidence interval was becoming narrow, which had a trend toward  
12  
13  
14 286 significance (**Figure S14**). Thus, risk for hemorrhagic stroke might be reduced, and  
15  
16  
17 287 further studies are still needed.  
18  
19  
20 288

### 289 **Sensitivity Analysis**

290 When three<sup>24-26</sup> studies were excluded in T2D analysis, the summary RR changed  
291 from 0.78 ([95% CI, 0.75-0.81]) to 0.78 ([95% CI, 0.75-0.82]) with the heterogeneity  
292 declining from ( $I^2 = 35.6\%$ ;  $P = 0.021$ ) to ( $I^2 = 24.0\%$ ;  $P = 0.112$ ). Among T2D  
293 analysis, eight studies<sup>19,22,23,26,33,39,48,49</sup> adjusted for cereal fiber intake yield an RR of  
294 0.79 ([95% CI, 0.73-0.85];  $P < 0.001$ ) and two studies<sup>15,35</sup> for calcium yielded an RR  
295 of 0.87 ([95% CI, 0.73-1.04];  $P = 0.128$ ). While among total stroke analysis, the  
296 summary RR was 0.92 ([95% CI, 0.82-1.02];  $P = 0.097$ ) in five studies<sup>13,44-46,50</sup>  
297 adjusted for potassium intake and was 0.89 ([95% CI, 0.80-0.99];  $P = 0.040$ ) in five  
298 studies<sup>14,44-46,50</sup> adjusted for calcium. Only one study<sup>15</sup> adjusted for potassium intake  
299 in T2D, one study<sup>36</sup> for cereal fiber in total stroke.  
300

### 301 **Subgroup Analysis**

302 Stratified analyses by characteristics of the population and study design were  
303 conducted on T2D (**Table 1**), total stroke, ischemic stroke and hemorrhagic stroke  
304

1  
2  
3  
4 304 (**Table 2**). The inverse association with T2D remained robust across all subgroups  
5  
6  
7 305 with little evidence of heterogeneity. As for stroke incidence, a decreased risk of total  
8  
9  
10 306 stroke and ischemic stroke was found in female participants (RR, 0.91 [95% CI,  
11  
12 307 0.83-0.99] for total stroke; 0.89 [95% CI, 0.79-1.00] for ischemic stroke) and  
13  
14 308 individuals with  $\geq 25$  kg/m<sup>2</sup> mean BMI (RR, 0.89 [95% CI, 0.82-0.96] for total stroke;  
15  
16  
17 309 0.88 [95% CI, 0.81-0.96] for ischemic stroke). When restricted to a  $\geq 12$  y follow-up,  
18  
19  
20 310 the risk of total stroke and ischemic stroke could be significantly reduced (RR, 0.89  
21  
22 311 [95% CI, 0.83-0.95] for total stroke; 0.88 [95% CI, 0.81-0.95] for ischemic stroke).  
23  
24  
25 312 These risks were more reduced in North American and European individuals than  
26  
27  
28 313 Asians. Cardiovascular events (CV events, coronary heart disease, heart failure, atrial  
29  
30 314 fibrillation, and self-reported heart disease etc. other than stroke),  
31  
32  
33 315 hypercholesterolemia and diabetes would blunt the effect of magnesium on total and  
34  
35  
36 316 ischemic stroke. However, magnesium intake could still, or at least, demonstrate the  
37  
38  
39 317 trend to decrease total and ischemic stroke in individuals even with those risk factors.  
40  
41  
42 318 Similarly, CV events, hypercholesterolemia and family diabetes history had no  
43  
44  
45 319 substantial impact on the inverse association between T2D incidence and magnesium  
46  
47  
48 320 intake. We did not find significantly reduced risk in hemorrhagic stroke across the  
49  
50  
51 321 subgroup analyses.

52  
53

### 323 **Dose-Response Analysis**

54  
55  
56 324 In this part, both linear and nonlinear relationships were found in T2D (**Figure 3A**), in  
57  
58  
59 325 total stroke (**Figure 3B**), and in ischemic stroke (**Figure 3C**). However, no linear or  
60

1  
2  
3  
4 326 non-linear dose-response relationship was observed in hemorrhagic stroke (**Figure 3D**)  
5  
6 327 along with the subtypes including subarachnoid hemorrhage and intracerebral  
7  
8  
9 328 hemorrhage (**Figure S15**).

10  
11 329 Specifically, we calculated RR for the magnesium increments if there was linear  
12  
13  
14 330 relationship found. The calculated RR was 0.94 ([95% CI, 0.93-0.95]) for the 100  
15  
16  
17 331 mg/day increment for T2D. For total stroke, the summary RR was 0.98 ([95% CI,  
18  
19 332 0.97-0.99]) related to 100 mg/day increment in magnesium intake, RR for ischemic  
20  
21  
22 333 stroke was 0.98 ([95% CI, 0.97-0.99]) related to 100 mg/day increment in magnesium  
23  
24  
25 334 intake. There was no RR cut-off point at which the decreasing trend reversed, but the  
26  
27  
28 335 RR decreased a bit rapidly with any slightly decreases at approximately 260 mg/day  
29  
30  
31 336 for T2D and 350 mg/day for total/ischemic stroke. But there was substantial  
32  
33 337 uncertainty in the lower range of this distribution (**Figure 3A, 3B, 3C**).

34  
35 338

## 37 339 **Discussion**

### 40 340 **Main findings**

41  
42  
43 341 This paper used a general and up-to-date search strategy to identify some additional  
44  
45  
46 342 studies that were missed in prior meta-analyses under real-world conditions. Our  
47  
48  
49 343 results support a significant inverse association between magnesium consumption and  
50  
51  
52 344 T2D, total stroke and ischemic stroke at the highest level vs. the lowest. No  
53  
54  
55 345 significant association for hemorrhagic stroke, subarachnoid hemorrhage and  
56  
57  
58 346 intracerebral hemorrhage was detected. Female obese participants (mean BMI  $\geq$  25  
59  
60 347 kg/m<sup>2</sup>) with longer follow-up period ( $\geq$  12 y) might obtain a greater benefit from

1  
2  
3  
4 348 magnesium intake with a lower risk of total and ischemic stroke incidence. In  
5  
6 349 subgroup analyses, RR of stroke risk was highly decreased among North American  
7  
8  
9 350 and European individuals. Significant risk reduced by 6%, 2%, and 2% for T2D, total  
10  
11 351 stroke and ischemic stroke respectively at per 100 mg/day increment in magnesium  
12  
13  
14 352 intake level. Overall, our study supports the guidelines to address the role of  
15  
16  
17 353 magnesium intake for T2D and stroke early prevention. Even though, we still require  
18  
19 354 more randomized controlled trials (RCTs) in the future to validate the causality.  
20  
21  
22  
23  
24

25  
26  
27  
28  
29  
30  
31  
32  
33  
34  
35  
36  
37  
38  
39  
40  
41  
42  
43  
44  
45  
46  
47  
48  
49  
50  
51  
52  
53  
54  
55  
56  
57  
58  
59  
60

### 356 **Clinical implications**

357 Dietary nutrients are hot topics for current clinical medicine, folic acid, vitamin D,  
358 and  $\omega$ -3 fatty acids have been specifically recommended to pregnant women, infants  
359 and children, and the elderly<sup>62,63</sup>, however, magnesium has been less extensively  
360 discussed. This is a noteworthy study for the following reasons. First, current study  
361 reinforces the possible role of magnesium in the prevention and management of two  
362 chronic illnesses and causes new considerations on the avoidance of other chronic  
363 disease with potential diet strategy. Second, this comprehensive study with nearly two  
364 million individuals and abundant statistical power provides confirming evidence for  
365 medical practitioners, health educators and policy makers. Third, until this study, no  
366 related paper has discussed such detailed stratified analyses, which helps physicians to  
367 amplify the dietary benefits through individualized strategies. Interestingly, we  
368 detected North American and European participants seemed to receive more benefits  
369 from magnesium intake than Asians. Fourth, to our knowledge, this is the first study



1  
2  
3  
4 370 in which cumulative meta-analysis was performed to forecast the changing tendency  
5  
6 371 of main risk estimates. Based on past and current cutting edge evidence about  
7  
8  
9 372 nutrition and T2D prevention, the US Diabetes Prevention Program (DPP) conducted  
10  
11 373 a study that demonstrated that proper lifestyle modification (exercise and  
12  
13 374 Mediterranean diet) significantly reduced T2D risks irrespective of population  
14  
15 375 baselines, and the benefit expanded with increased follow-up<sup>64</sup>. The UK national  
16  
17 376 health service (UK NHS) will launch an intervention program including weight loss,  
18  
19 377 nutrition, monitoring and peer support targeting up to 10 000 people prone to develop  
20  
21 378 T2D<sup>65</sup>.

22  
23  
24  
25  
26  
27 379 2018 American Diabetes Association (ADA) guidelines<sup>66</sup> recommend to enhance  
28  
29 380 intake of nuts, berries, yogurt, coffee and tea in individuals who are at high risk of  
30  
31 381 diabetes. The latest guidelines by the American Heart Association (AHA)/American  
32  
33 382 Stroke Association (ASA)<sup>9</sup> also validate considerable status of early management of  
34  
35 383 stroke (ischemic stroke). In fact, magnesium is a cofactor of enzyme systems that  
36  
37 384 regulate diversity biomedical reactions including protein synthesis, muscle and nerve  
38  
39 385 transmission, neuromuscular conduction, signal transduction blood glucose control  
40  
41 386 and blood pressure management<sup>67</sup>. Magnesium played a role in transporting calcium  
42  
43 387 and potassium ions across cell membrane, also is crucial for structural function of  
44  
45 388 proteins, nucleic acids or mitochondria<sup>68</sup>. In diabetes, magnesium achieves glucose  
46  
47 389 and insulin metabolism through tyrosine kinase activity of the insulin receptor, intake  
48  
49 390 of magnesium also influences phosphorylase B kinase activity by releasing  
50  
51 391 glucose-1-phosphate from glycogen. Magnesium regulates glucose translocation into  
52  
53  
54  
55  
56  
57  
58  
59  
60

1  
2  
3  
4 392 the cell<sup>69</sup>. In stroke higher magnesium level deregulates glutamate and calcium cation  
5  
6 393 influx by reducing NMDA receptor activity, and blocks voltage-gated calcium  
7  
8  
9 394 channel eliminating calcium cation cytotoxicity. Additionally, magnesium has  
10  
11 395 vasodilatory effect which may do benefit to ischemic stroke patients<sup>70</sup>. In deed, a poor  
12  
13  
14 396 outcome on hemorrhagic stroke was observed in a RCT, however, high serum  
15  
16  
17 397 magnesium might be better for intracerebral hemorrhage prognosis<sup>71</sup>.

18  
19 398 Most specific nutrients especially macronutrients are correlated with total energy  
20  
21  
22 399 intake. In included free-living human studies, variation of total energy intake is  
23  
24 400 originated from physical activity, differences in body size, and differences in energy  
25  
26  
27 401 efficiency<sup>72</sup>. Thus total energy intake can weaken the investigated association with  
28  
29  
30 402 considerable nutrients intake if this covariable is not properly removed.  
31  
32 403 Epidemiologists should assess reproducibility and validity of energy-adjusted  
33  
34  
35 404 nutrients as well as absolute nutrients intake. Though micronutrient as magnesium is,  
36  
37  
38 405 inverse association could be still found in T2D, total stroke and ischemic stroke  
39  
40  
41 406 outcomes after total energy intake adjustment. As for other nutrients, potassium intake  
42  
43 407 is proposed to lower blood pressure (BP) and improve vascular outcomes (including  
44  
45  
46 408 stroke); dietary potassium may also be influential in glucose control and limiting the  
47  
48 409 risk of diabetes<sup>73</sup>. Vitamin D and calcium may negatively influence glycemia, but the  
49  
50  
51 410 evidence is limited for mostly being based on cross-sectional observational studies<sup>74</sup>.  
52  
53 411 Calcium may be inversely associated with stroke in populations with low to moderate  
54  
55  
56 412 calcium intakes, but no significant association was found between calcium and CVD<sup>75</sup>.  
57  
58 413 All things considered, magnesium-rich food such as nuts (151-567 mg/100g edibles),  
59  
60

1  
2  
3  
4 414 fruits (132-448 mg/100g edibles), vegetables (132-1257 mg/100g edibles), legumes  
5  
6 415 (138-243 mg/100g edibles), fish (143-303 mg/100g edibles) and total grain (134-306  
7  
8  
9 416 mg/100g edibles) should be recommended to populations with insufficient magnesium  
10  
11 417 intake.

12  
13  
14 418

### 17 419 **Compared with other similar studies**

18  
19 420 This seminar has several differences with previous studies. Dong et al<sup>52</sup> found  
20  
21 421 magnesium intake had an inverse association with T2D incidence (RR, 0.78 [95% CI,  
22  
23 422 0.73-0.84]), and with an intake of 100 mg/day magnesium, the risk was reduced by  
24  
25 423 14%. In fact, they failed to include adequate studies, and standard quality assessments  
26  
27 424 of eligible studies were absent. Individuals from multiple nations in some  
28  
29 425 studies<sup>18,25,26,32</sup> were incorrectly assigned to Asia or the U.S. in the subgroups, and  
30  
31 426 minor imperfections existed in the selection criteria because it was unclear whether  
32  
33 427 they excluded participants with subclinical diabetes. BMI was not a potential modifier  
34  
35 428 for T2D in our study due to the inclusion of more evidence which had longer  
36  
37 429 follow-up period. Fang et al<sup>76</sup> revealed dietary magnesium was significantly  
38  
39 430 associated with reduced risk of T2D (RR, 0.74 [95% CI, 0.69-0.80]) and stroke (RR,  
40  
41 431 0.88 [95% CI, 0.82-0.95]). The results were comparable, but they just focused on  
42  
43 432 dietary magnesium intake rather than overall magnesium intake (total or dietary), and  
44  
45 433 subtypes of total stroke were missed. To our overall knowledge, BMI, follow-up,  
46  
47 434 family diabetes history, etc. were crucial confounders for evaluating the association,  
48  
49 435 which were not addressed in their study. Moreover, researchers had better investigate  
50  
51  
52  
53  
54  
55  
56  
57  
58  
59  
60

1  
2  
3  
4 436 the likelihood of linear association in the dose-response pattern (using methods by  
5  
6  
7 437 Greenland and Orsini et al). Fang et al<sup>77</sup> found that the 100 mg/day intake of dietary  
8  
9 438 magnesium was associated with an 8-13% reduction in T2D risk, and while a  
10  
11  
12 439 nonlinear relationship did not exist, a minor publication bias was present. Twenty-five  
13  
14  
15 440 studies were eligible; however, some of them focused not on dietary but on total  
16  
17 441 magnesium intake. Moreover, there were two included studies focusing on red meat  
18  
19  
20 442 intake instead of magnesium intake. After excluding actual ineligible studies, we  
21  
22  
23 443 found no evidence of publication bias. Additionally, both linear and nonlinear  
24  
25 444 relationships existed for T2D, because the RRs of the highest category of magnesium  
26  
27 445 intake VS. the lowest in our pooled study were still used. A study by Larsson et  
28  
29  
30 446 al<sup>53</sup>including 7 studies supported a modest but statistically significant inverse  
31  
32  
33 447 association between dietary magnesium intake and stroke. The sample size was quite  
34  
35  
36 448 small, and there was no useful information for stroke subtypes (e.g., ischemic stroke,  
37  
38 449 hemorrhagic stroke) in the main analysis. In our opinion, a well-designed subgroup  
39  
40  
41 450 analysis is a compulsory undertaking, and a pooled stroke result restricted by  
42  
43  
44 451 potassium and calcium adjustment is recommended. The current study found  
45  
46  
47 452 magnesium intake was strongly inversely associated with total stroke and ischemic  
48  
49  
50 453 stroke, which still existed in the dose-response pattern.

51 454

#### 53 455 **Directions for further research**

55  
56 456 Future studies still have something to be addressed. At first, no significant association  
57  
58  
59 457 was found in hemorrhagic stroke, however, the beneficial trend was observed in the  
60

1  
2  
3  
4 458 cumulative meta-analysis, which addresses needs for more updated prospective  
5  
6  
7 459 studies and RCTs. Second, there is a key question regarding the optimal time to start  
8  
9 460 prevention and methods to screen severe complications. Cardiovascular events occur  
10  
11 461 in more than 50% and diabetic kidney disease occurs in 20-40% of patients with  
12  
13  
14 462 diabetes. Actually, cardiovascular events increase the risk of death three to four times  
15  
16  
17 463 compared with patients without such complications. A sustained period of intensive  
18  
19 464 glucose control early in T2D has been confirmed to reduce complication rates<sup>78</sup>. Most  
20  
21  
22 465 importantly, to the public, educators and guideline makers, boosting magnesium-rich  
23  
24  
25 466 food consumption relates to considerable benefits to T2D and total stroke prevention,  
26  
27 467 especially in high-risk populations.  
28  
29

30 468

### 31 32 469 **Limitations**

33  
34  
35 470 Several limitations deserve further discussion. First, this group-level meta-analysis is  
36  
37 471 insufficient. Although strong inverse associations for T2D and total stroke were  
38  
39  
40 472 reported, individual-level studies having more detection power are required. Second,  
41  
42  
43 473 several variations cannot be totally understood, for example, we cannot exclude the  
44  
45  
46 474 possibility that other nutrients and/or dietary components correlated with dietary  
47  
48 475 magnesium may have been responsible, either partially or entirely, for the observed  
49  
50  
51 476 associations. Based on eligible studies, we could not quantify the impact of  
52  
53  
54 477 supplementary magnesium (not combined with dietary intake) on T2D and stroke  
55  
56 478 incidence. The real effect of some dietary supplements on T2D or cardiovascular  
57  
58  
59 479 disease seems very interesting to a number of medical experts, clinicians and nutrition  
60

1  
2  
3  
4 480 educators. Third, FFQs/validated FFQs mostly used in primary studies could not  
5  
6 481 characterize all the nutrients, which misclarified plausible associations. It was  
7  
8  
9 482 suggested that magnesium specific food questionnaire and/or food records should be  
10  
11 483 reasonably used for accurate magnesium intake estimation. Finally, we still required  
12  
13  
14 484 further RCTs, because observational studies might only reach the same conclusion  
15  
16  
17 485 (i.e., magnesium intake is inversely associated with T2D incidence) but could not  
18  
19 486 prove causality.  
20  
21

22 487

## 23 24 25 488 **Conclusion**

26  
27 489 Magnesium intake has a substantial inverse association with T2D and total stroke.  
28  
29  
30 490 Among these populations, magnesium consumption can be recommended as an  
31  
32 491 optimization for T2D, total stroke and ischemic stroke primary prevention or early  
33  
34  
35 492 management. In particular, the greater the magnesium intake, the more reduced risk is  
36  
37  
38 493 observed. As patients, physicians, policy makers and legislators debate on these issues,  
39  
40 494 such a cost-effective alternative is needed to inform policy decisions and assist reform  
41  
42  
43 495 in global dietary health care.  
44  
45

46 496

47  
48 497 **Acknowledgements:** The authors thank professor Yanhua Tang, MD (The second  
49  
50 498 affiliated hospital of Nanchang University) for her advice and professor Xiaoshu  
51  
52  
53 499 Cheng, MD, PhD (The second affiliated hospital of Nanchang University) for his data  
54  
55  
56 500 collection.  
57

58 501  
59  
60

1  
2  
3  
4 502 **Competing interests**

5  
6 503 None declared

7  
8  
9 504

10  
11 505 **Provenance and peer review**

12  
13  
14 506 Not commissioned; externally peer reviewed.

15  
16  
17 507

18  
19 508 **Data availability statement**

20  
21  
22 509 All data relevant to the study are included in the article or uploaded as supplementary  
23  
24 510 information.

25  
26  
27 511

28  
29 512 **Patient consent for publication**

30  
31  
32 513 Not required.

33  
34  
35 514

36  
37 515 **Funding Sources**

38  
39  
40 516 This study was supported by National Natural Science Foundation of China (NSFC),  
41  
42 517 number of grants (81560345), Natural Science Foundation of Jiangxi Province (Grant  
43  
44 518 number: 20161BAB215237).

45  
46  
47 519

48  
49 520 **Author Contribution:** Binghao Zhao had full access to all of the data in the  
50  
51 521 manuscript and takes responsibility for the integrity of the data and the accuracy of  
52  
53 522 the data analysis.

54  
55 523 Concept and design: All authors.

56  
57 524 Acquisition, analysis, or interpretation of data: All authors.

58  
59 525 Drafting of the manuscript: Binghao Zhao and Wenxiong Zhang.

1  
2  
3  
4 526 Critical revision of the manuscript for important intellectual content: Binghao Zhao,  
5 527 Lianli Zeng, Jiani Zhao, Qian Wu, Fang Zou, Li Gan and Yifei Dong.

6  
7 528 Statistical analysis: Binghao Zhao.

8  
9 529 Supervision: Wenxiong Zhang and Yiping Wei

10  
11  
12 530

13  
14 531 **Reference**

15  
16  
17 532 1. Centers for Disease Control and Prevention. National Diabetes Statistics Report,  
18  
19 533 2017. Atlanta, GA: Centers for Disease Control and Prevention, US Department of  
20  
21 534 Health and Human Services; 2017.

22  
23  
24 535 2. NCD Risk Factor Collaboration (NCD-RisC). Worldwide trends in diabetes since  
25  
26 536 1980: a pooled analysis of 751 population-based studies with 4.4 million participants.  
27  
28 537 Lancet. 2016;387(10027):1513-1530.

29  
30  
31 538 3. Benjamin EJ, Blaha MJ, Chiuve SE, Cushman M, Das SR, Deo R, et al. Heart  
32  
33 539 Disease and Stroke Statistics-2017 Update: A Report From the American Heart  
34  
35 540 Association. Circulation. 2017;135(10):e146-e603.

36  
37  
38 541 4. Feigin VL, Forouzanfar MH, Krishnamurthi R, Mensah GA, Connor M, Bennett  
39  
40 542 DA, et al. Global and regional burden of stroke during 1990-2010: findings from the  
41  
42 543 Global Burden of Disease Study 2010. Lancet. 2014;383(9913):245-254.

43  
44  
45 544 5. Barbagallo M, Dominguez LJ. Magnesium metabolism in type 2 diabetes mellitus,  
46  
47 545 metabolic syndrome and insulin resistance. Arch Biochem Biophys.  
48  
49 546 2007;458(1):40-47.

50  
51  
52 547 6. Zhao L, Zhang F, Ding X, Wu G, Lam YY, Wang X, et al. Gut bacteria  
53  
54 548 selectively promoted by dietary fibers alleviate type 2 diabetes. Science.



- 1  
2  
3  
4 549 2018;359(6380):1151-1156.  
5  
6  
7 550 7. Reffelmann T, Ittermann T, Dörr M, Völzke H, Reinthaler M, Petersmann A, et al.  
8  
9 551 Low serum magnesium concentrations predict cardiovascular and all-cause mortality.  
10  
11 552 Atherosclerosis. 2011;219(1):280-284.  
12  
13  
14 553 8. Fadelu T, Zhang S, Niedzwiecki D, Ye X, Saltz LB, Mayer RJ, et al. Nut  
15  
16 554 Consumption and Survival in Patients With Stage III Colon Cancer: Results From  
17  
18 555 CALGB 89803 (Alliance). J Clin Oncol. 2018;36(11):1112-1120.  
19  
20  
21  
22 556 9. Powers WJ, Rabinstein AA, Ackerson T, Adeoye OM, Bambakidis NC, Becker K,  
23  
24 557 et al. 2018 Guidelines for the Early Management of Patients With Acute Ischemic  
25  
26 558 Stroke: A Guideline for Healthcare Professionals From the American Heart  
27  
28 559 Association/American Stroke Association. Stroke. 2018;49(3):e46-e110.  
29  
30  
31  
32 560 10. Brignole M, Moya A, de Lange FJ, Deharo JC, Elliott PM, Fanciulli A, et al.  
33  
34 561 2018 ESC Guidelines for the diagnosis and management of syncope. Eur Heart J.  
35  
36 562 2018:ehy037.  
37  
38  
39  
40 563 11. Salmerón J, Ascherio A, Rimm EB, Colditz GA, Spiegelman D, Jenkins DJ, et al.  
41  
42 564 Dietary Fiber, Glycemic Load, and Risk of NIDDM in Men. Diabetes care.  
43  
44 565 1997;20(4):545-550.  
45  
46  
47  
48 566 12. Salmeron J, Manson JE, Stampfer MJ, Colditz GA, Wing AL, Willett WC.  
49  
50 567 Dietary fiber, glycemic load, and risk of non-insulin-dependent diabetes mellitus in  
51  
52 568 women. JAMA. 1997;277(6):472-477.  
53  
54  
55  
56 569 13. Ascherio A, Rimm EB, Hernán MA, Giovannucci EL, Kawachi I, Stampfer MJ,  
57  
58 570 et al. Intake of potassium, magnesium, calcium, and fiber and risk of stroke among  
59  
60

- 1  
2  
3  
4 571 US men. *Circulation*. 1998;98(12):1198-1204.
- 5  
6 572 14. Iso H, Stampfer MJ, Manson JE, Rexrode K, Hennekens CH, Colditz GA, et al.  
7  
8  
9 573 Prospective study of calcium, potassium, and magnesium intake and risk of stroke in  
10  
11  
12 574 women. *Stroke*. 1999;30(9):1772-1779.
- 13  
14 575 15. Kao WH, Folsom AR, Nieto FJ, Mo JP, Watson RL, Brancati FL. Serum and  
15  
16  
17 576 dietary magnesium and the risk for type 2 diabetes mellitus: the Atherosclerosis Risk  
18  
19  
20 577 in Communities Study. *Arch Intern Med*. 1999;159(18):2151-2159.
- 21  
22 578 16. Liu S, Manson JE, Stampfer MJ, Hu FB, Giovannucci E, Colditz GA, et al. A  
23  
24  
25 579 prospective study of whole-grain intake and risk of type 2 diabetes mellitus in US  
26  
27  
28 580 women. *Am J Public Health*. 2000;90(9):1409-1415.
- 29  
30 581 17. Meyer KA, Kushi LH, Jacobs DR, Jr., Slavin J, Sellers TA, Folsom AR.  
31  
32  
33 582 Carbohydrates, dietary fiber, and incident type 2 diabetes in older women. *Am J*  
34  
35  
36 583 *Clin Nutr*. 2000;71(4):921-930.
- 37  
38 584 18. Hodge AM, English DR, O'Dea K, Giles GG. Glycemic index and dietary fiber  
39  
40  
41 585 and the risk of type 2 diabetes. *Diabetes care*. 2004;27(11):2701-2706.
- 42  
43 586 19. Lopez-Ridaura R, Willett WC, Rimm EB, Liu S, Stampfer MJ, Manson JE, et al.  
44  
45  
46 587 Magnesium intake and risk of type 2 diabetes in men and women. *Diabetes care*.  
47  
48  
49 588 2004;27(1):134-140.
- 50  
51 589 20. Song Y, Manson JE, Buring JE, Liu S. Dietary magnesium intake in relation to  
52  
53  
54 590 plasma insulin levels and risk of type 2 diabetes in women. *Diabetes care*.  
55  
56  
57 591 2004;27(1):59-65.
- 58  
59 592 21. Song Y, Manson JE, Cook NR, Albert CM, Buring JE, Liu S. Dietary magnesium  
60

- 1  
2  
3  
4 593 intake and risk of cardiovascular disease among women. *Am J Cardiol.*  
5  
6 594 2005;96(8):1135-1141.  
7  
8  
9 595 22. Liu S, Choi HK, Ford E, Song Y, Klevak A, Buring JE, et al. A prospective study  
10  
11 596 of dairy intake and the risk of type 2 diabetes in women. *Diabetes care.*  
12  
13 597 2006;29(7):1579-1584.  
14  
15  
16 598 23. Pereira MA, Parker ED, Folsom AR. Coffee consumption and risk of type 2  
17  
18 599 diabetes mellitus: an 11-year prospective study of 28812 postmenopausal women.  
19  
20 600 *Arch Intern Med.* 2006;166(12):1311-1316.  
21  
22  
23 601 24. Pittas AG, Dawson-Hughes B, Li T, Van Dam RM, Willett WC, Manson JE, et al.  
24  
25 602 Vitamin D and calcium intake in relation to type 2 diabetes in women. *Diabetes care.*  
26  
27 603 2006;29(3):650-656.  
28  
29  
30 604 25. Van Dam RM, Hu FB, Rosenberg L, Krishnan S, Palmer JR. Dietary calcium and  
31  
32 605 magnesium, major food sources, and risk of type 2 diabetes in U.S. black women.  
33  
34 606 *Diabetes care.* 2006;29(10):2238-2243.  
35  
36  
37 607 26. Schulze MB, Schulz M, Heidemann C, Schienkiewitz A, Hoffmann K, Boeing H.  
38  
39 608 Fiber and magnesium intake and incidence of type 2 diabetes: a prospective study and  
40  
41 609 meta-analysis. *Arch Intern Med.* 2007;167(9):956-965.  
42  
43  
44 610 27. Larsson SC, Virtanen MJ, Mars M, Männistö S, Pietinen P, Albanes D, et al.  
45  
46 611 Magnesium, calcium, potassium, and sodium intakes and risk of stroke in male  
47  
48 612 smokers. *Arch Intern Med.* 2008;168(5):459-465.  
49  
50  
51 613 28. Weng LC, Yeh WT, Bai CH, Chen HJ, Chuang SY, Chang HY, et al. Is ischemic  
52  
53 614 stroke risk related to folate status or other nutrients correlated with folate intake?  
54  
55  
56  
57  
58  
59  
60

- 1  
2  
3  
4 615 Stroke. 2008;39(12):3152-3158.  
5  
6  
7 616 29. Kirii K, Mizoue T, Iso H, Takahashi Y, Kato M, Inoue M, et al. Calcium, vitamin  
8  
9 617 D and dairy intake in relation to type 2 diabetes risk in a Japanese cohort.  
10  
11 618 Diabetologia. 2009;52(12):2542-2550.  
12  
13  
14 619 30. Ohira T, Peacock JM, Iso H, Chambless LE, Rosamond WD, Folsom AR. Serum  
15  
16  
17 620 and Dietary Magnesium and Risk of Ischemic Stroke: The Atherosclerosis Risk in  
18  
19 621 Communities Study. Am J Epidemiol. 2009;169(12):1437-1444.  
20  
21  
22 622 31. Villegas R, Gao YT, Dai Q, Yang G, Cai H, Li H, et al. Dietary calcium and  
23  
24  
25 623 magnesium intakes and the risk of type 2 diabetes: the Shanghai Women's Health  
26  
27 624 Study. Am J Clin Nutr. 2009;89(4):1059-1067.  
28  
29  
30 625 32. Hopping BN, Erber E, Grandinetti A, Verheus M, Kolonel LN, Maskarinec G.  
31  
32 626 Dietary fiber, magnesium, and glycemic load alter risk of type 2 diabetes in a  
33  
34  
35 627 multiethnic cohort in hawaii. J Nutr. 2010;140(1):68-74.  
36  
37  
38 628 33. Kim DJ, Xun P, Liu K, Loria C, Yokota K, Jacobs DR Jr, et al. Magnesium  
39  
40 629 Intake in Relation to Systemic Inflammation, Insulin Resistance, and the Incidence of  
41  
42  
43 630 Diabetes. Diabetes care. 2010;33(12):2604-2610.  
44  
45  
46 631 34. Kirii K, Iso H, Date C, Fukui M, Tamakoshi A, JACC Study Group. Magnesium  
47  
48 632 intake and risk of self-reported type 2 diabetes among Japanese. J Am Coll Nutr.  
49  
50  
51 633 2010;29(2):99-106.  
52  
53  
54 634 35. Nanri A, Mizoue T, Noda M, Takahashi Y, Kirii K, Inoue M, et al. Magnesium  
55  
56 635 intake and type II diabetes in Japanese men and women: the Japan Public Health  
57  
58  
59 636 Center-based Prospective Study. Eur J Clin Nutr. 2010;64(10):1244-1247.  
60

- 1  
2  
3  
4 637 36. Larsson SC, Virtamo J, Wolk A. Potassium, calcium, and magnesium intakes and  
5  
6 638 risk of stroke in women. *Am J Epidemiol.* 2011;174(1):35-43.  
7  
8  
9 639 37. Weng LC, Lee NJ, Yeh WT, Ho LT, Pan WH. Lower intake of magnesium and  
10  
11 640 dietary fiber increases the incidence of type 2 diabetes in Taiwanese. *J Formos Med*  
12  
13 641 *Assoc.* 2012;111(11):651-659.  
14  
15  
16 642 38. Zhang W, Iso H, Ohira T, Date C, Tamakoshi A, JACC Study Group.  
17  
18 643 Associations of dietary magnesium intake with mortality from cardiovascular disease:  
19  
20 644 the JACC study. *Atherosclerosis.* 2012;221(2):587-595.  
21  
22  
23 645 39. Hata A, Doi Y, Ninomiya T, Mukai N, Hirakawa Y, Hata J, et al. Magnesium  
24  
25 646 intake decreases Type 2 diabetes risk through the improvement of insulin resistance  
26  
27 647 and inflammation: the Hisayama Study. *Diabet Med.* 2013;30(12):1487-1494.  
28  
29  
30 648 40. Lin PH, Yeh WT, Svetkey LP, Chuang SY, Chang YC, Wang C, et al. Dietary  
31  
32 649 intakes consistent with the DASH dietary pattern reduce blood pressure increase with  
33  
34 650 age and risk for stroke in a Chinese population. *Asia Pac J Clin Nutr.*  
35  
36 651 2013;22(3):482-491.  
37  
38  
39 652 41. Oba S, Nanri A, Kurotani K, Goto A, Kato M, Mizoue T, et al. Dietary glycemic  
40  
41 653 index, glycemic load and incidence of type 2 diabetes in Japanese men and women:  
42  
43 654 the Japan Public Health Center-based Prospective Study. *Nutr J.* 2013;12(1):165.  
44  
45  
46 655 42. Sluijs I, Czernichow S, Beulens JWJ. Dietary electrolytes and risk of ischemic  
47  
48 656 stroke. *Eur J Prev Cardiol.* 2013;20(1):S76.  
49  
50  
51 657 43. Hruby A, Meigs JB, O'Donnell CJ, Jacques PF, Mckeown NM. Higher  
52  
53 658 Magnesium Intake Reduces Risk of Impaired Glucose and Insulin Metabolism and  
54  
55  
56  
57  
58  
59  
60

- 1  
2  
3  
4 659 Progression From Prediabetes to Diabetes in Middle-Aged Americans. *Am J Dis*  
5  
6 660 *Child*. 2014;37(2):419-427.
- 7  
8  
9 661 44. Sluijs I, Czernichow S, Beulens JW, Boer JM, van der Schouw YT, Verschuren  
10  
11 662 WM, et al. Intakes of potassium, magnesium, and calcium and risk of stroke. *Stroke*.  
12  
13 663 2014;45(4):1148-1150.
- 14  
15  
16  
17 664 45. Adebamowo SN, Spiegelman D, Flint AJ, Willett WC, Rexrode KM. Intakes of  
18  
19 665 magnesium, potassium, and calcium and the risk of stroke among men. *Int J Stroke*.  
20  
21 666 2015;10(7):1093-1100.
- 22  
23  
24 667 46. Adebamowo SN, Spiegelman D, Willett WC, Rexrode KM. Association between  
25  
26 668 intakes of magnesium, potassium, and calcium and risk of stroke: 2 cohorts of US  
27  
28 669 women and updated meta-analyses. *Am J Clin Nutr*. 2015;101(6):1269-1277.
- 29  
30  
31  
32 670 47. Bain LK, Myint PK, Jennings A, Lentjes MA, Luben RN, Khaw KT, et al. The  
33  
34 671 relationship between dietary magnesium intake, stroke and its major risk factors,  
35  
36 672 blood pressure and cholesterol, in the EPIC-Norfolk cohort. *Int J Cardiol*.  
37  
38 673 2015;196:108-114.
- 39  
40  
41  
42 674 48. Huang Y-C, Wahlqvist ML, Kao M-D, Wang J-L, Lee M-S. Optimal Dietary and  
43  
44 675 Plasma Magnesium Statuses Depend on Dietary Quality for a Reduction in the Risk of  
45  
46 676 All-Cause Mortality in Older Adults. *Nutrients*. 2015;7(7):5664-5683.
- 47  
48  
49 677 49. Hruby A, Guasch-Ferré M, Bhupathiraju SN, Manson JE, Willett WC, McKeown  
50  
51 678 NM, et al. Magnesium Intake, Quality of Carbohydrates, and Risk of Type 2 Diabetes:  
52  
53 679 Results From Three U.S. Cohorts. *Diabetes care*. 2017;40(12):1695-1702.
- 54  
55  
56  
57 680 50. Kokubo Y, Saito I, Iso H, Yamagishi K, Yatsuya H, Ishihara J, et al. Dietary  
58  
59  
60

- 1  
2  
3  
4 681 magnesium intake and risk of incident coronary heart disease in men: A prospective  
5  
6 682 cohort study. *Clin Nutr.* 2018;37(5):1602-1608.
- 7  
8  
9 683 51. Konishi K, Wada K, Tamura T, Tsuji M, Kawachi T, Nagata C. Dietary  
10  
11 684 magnesium intake and the risk of diabetes in the Japanese community: results from  
12  
13  
14 685 the Takayama study. *Eur J Nutr.* 2017;56(2):767-774.
- 15  
16  
17 686 52. Dong JY, Xun P, He K, Qin LQ. Magnesium intake and risk of type 2 diabetes:  
18  
19 687 meta-analysis of prospective cohort studies. *Diabetes care.* 2011;34(9):2116-2122.
- 20  
21  
22 688 53. Larsson SC, Orsini N, Wolk A. Dietary magnesium intake and risk of stroke: a  
23  
24 689 meta-analysis of prospective studies. *Am J Clin Nutr.* 2012;95(2):362-366.
- 25  
26  
27 690 54. Adams HP Jr, Bendixen BH, Kappelle LJ, Biller J, Love BB, Gordon DL, et al.  
28  
29 691 Classification of subtype of acute ischemic stroke. Definitions for use in a multicenter  
30  
31 692 clinical trial. TOAST. Trial of Org 10172 in Acute Stroke Treatment. *Stroke.*  
32  
33 693 1993;24(1):35-41.
- 34  
35  
36  
37 694 55. Rannikmäe K, Woodfield R, Anderson CS, Charidimou A, Chiewvit P,  
38  
39 695 Greenberg SM, et al. Reliability of intracerebral hemorrhage classification systems: A  
40  
41 696 systematic review. *Int J Stroke.* 2016;11(6):626-636.
- 42  
43  
44  
45 697 56. GA Wells, B Shea, D O'Connell, J Peterson, V Welch, M Losos. The  
46  
47 698 Newcastle–Ottawa Scale (NOS) for Assessing the Quality of Non-Randomized  
48  
49 699 Studies in Meta-Analysis. *Appl Eng Agric.* 2014;18(6): 727-734.
- 50  
51  
52  
53 700 57. Higgins JP, Thompson SG, Deeks JJ, Altman DG. Measuring inconsistency in  
54  
55 701 meta-analyses. *BMJ.* 2003;327(7414):557-560.
- 56  
57  
58 702 58. Greenland S, Longnecker MP. Methods for trend estimation from summarized  
59  
60

- 1  
2  
3  
4 703 dose-response data, with applications to meta-analysis. *Am J Epidemiol.*  
5  
6 704 1992;135(11):1301-1309.
- 7  
8  
9 705 59. Orsini N, Bellocco R, Greenland S. Generalized least squares for trend estimation  
10  
11 706 of summarized dose-response data. *Stata J.* 2006;6(6):40-57.
- 12  
13  
14 707 60. Begg CB, Mazumdar M. Operating characteristics of a rank correlation test for  
15  
16 708 publication bias. *Biometrics.* 1994;50(4):1088-1101.
- 17  
18  
19 709 61. Egger M, Davey Smith G, Schneider M, Minder C. Bias in meta-analysis detected  
20  
21 710 by a simple, graphical test. *BMJ.* 1997;315(7109):629-634.
- 22  
23  
24 711 62. Manson JE, Bassuk SS. Vitamin and mineral supplements: What clinicians need  
25  
26 712 to know. *JAMA.* 2018;319(9):859-860.
- 27  
28  
29 713 63. Papanicolaos I, Woskie LR, Jha AK. Health Care Spending in the United States and  
30  
31 714 Other High-Income Countries. *JAMA.* 2018;319(10):1024-1039.
- 32  
33  
34 715 64. Group DPP, Temprosa M. Long-term effects of lifestyle intervention or  
35  
36 716 metformin on diabetes development and microvascular complications over 15-year  
37  
38 717 follow-up: the Diabetes Prevention Program Outcomes Study. *Lancet Diabetes*  
39  
40 718 *Endocrinol.* 2015;3(11):866-875.
- 41  
42  
43 719 65. Maruthappu M, Sood H, Keogh B. Radically upgrading diabetes prevention in  
44  
45 720 England. *Lancet Diabetes Endocrinol.* 2015;3(5):312-313.
- 46  
47  
48 721 66. American Diabetes Association. Prevention or Delay of Type 2 Diabetes:  
49  
50 722 Standards of Medical Care in Diabetes-2018. *Diabetes care.* 2018;41(1):S51-S54.
- 51  
52  
53 723 67. Guerrero-Romero F, Simental-Mendía LE, Hernández-Ronquillo G,  
54  
55 724 Rodríguez-Morán M. Oral magnesium supplementation improves glycaemic status in  
56  
57  
58  
59  
60



- 1  
2  
3  
4 725 subjects with prediabetes and hypomagnesaemia: A double-blind placebo-controlled  
5  
6 726 randomized trial. *Diabetes Metab.* 2015;41(3):202-207.  
7  
8  
9 727 68. Ramadass S, Basu S, Srinivasan AR. SERUM magnesium levels as an indicator  
10  
11 728 of status of Diabetes Mellitus type 2. *Diabetes Metab Syndr.* 2015;9(1):42-45.  
12  
13  
14 729 69. Eimerl S, Schramm M. The Quantity of Calcium that Appears to Induce Neuronal  
15  
16 730 Death. *J Neurochem.* 2010;62(3):1223-1226.  
17  
18  
19 731 70. Wm VDB, Algra A, Van KF, et al. Magnesium sulfate in aneurysmal  
20  
21 732 subarachnoid hemorrhage: a randomized controlled trial. *Stroke.*  
22  
23 733 2005;36(5):1011-1015.  
24  
25  
26  
27 734 71. Goyal N, Tsivgoulis G, Malhotra K, Houck AL, Khorchid YM, Pandhi A, et al.  
28  
29 735 Serum Magnesium Levels and Outcomes in Patients With Acute Spontaneous  
30  
31 736 Intracerebral Hemorrhage. *J Am Heart Assoc.* 2018;7(8): e008698.  
32  
33  
34  
35 737 72. Willett WC, Howe GR, Kushi LH. Adjustment for total energy intake in  
36  
37 738 epidemiologic studies. *Am J Clin Nutr.* 1997;65(4):1220S-1228S; discussion  
38  
39 739 1229S-1231S.  
40  
41  
42  
43 740 73. Stone MS, Martyn L, Weaver CM. Potassium Intake, Bioavailability,  
44  
45 741 Hypertension, and Glucose Control. *Nutrients.* 2016;8(7): E444.  
46  
47  
48 742 74. Pittas AG, Lau J, Hu FB, Dawson-Hughes B. The role of vitamin D and calcium  
49  
50 743 in type 2 diabetes. A systematic review and meta-analysis. *J Clin Endocrinol Metab.*  
51  
52 744 2007;92(6): 2017-2029.  
53  
54  
55  
56 745 75. Larsson SC, Orsini N, Wolk A. Dietary calcium intake and risk of stroke: a  
57  
58 746 dose-response meta-analysis. *Am J Clin Nutr.* 2013;97(5): 951-957.  
59  
60

- 1  
2  
3  
4 747 76. Fang X, Wang K, Han D, He X, Wei J, Zhao L, et al. Dietary magnesium intake  
5  
6 748 and the risk of cardiovascular disease, type 2 diabetes, and all-cause mortality: a  
7  
8  
9 749 dose-response meta-analysis of prospective cohort studies. BMC Med.  
10  
11 750 2016;14(1):210.
- 12  
13  
14 751 77. Fang X, Han H, Li M, Liang C, Fan Z, Aaseth J, et al. Dose-Response  
15  
16 752 Relationship between Dietary Magnesium Intake and Risk of Type 2 Diabetes  
17  
18 753 Mellitus: A Systematic Review and Meta-Regression Analysis of Prospective Cohort  
19  
20 754 Studies. Nutrients. 2016;8(11):739.
- 21  
22  
23  
24 755 78. Riddle MC, Ambrosius WT, Brillon DJ, Buse JB, Byington RP, Cohen RM, et al.  
25  
26 756 Epidemiologic Relationships Between A1C and All-Cause Mortality During a Median  
27  
28 757 3.4-Year Follow-up of Glycemic Treatment in the ACCORD Trial. Diabetes care.  
29  
30 758 2010;33(5):983-990.
- 31  
32  
33  
34  
35  
36  
37  
38  
39  
40  
41  
42  
43  
44  
45  
46  
47  
48  
49  
50  
51  
52  
53  
54  
55  
56  
57  
58  
59  
60

**Table 1** Subgroup Analysis relating to Magnesium Intake and Type 2 Diabetes (T2D)

| Group                                                                | T2D            |                  |          |                     |           |                   |
|----------------------------------------------------------------------|----------------|------------------|----------|---------------------|-----------|-------------------|
|                                                                      | No. of studies | RR (95% CI)      | $P_{ES}$ | $P_{heterogeneity}$ | $I^2$ (%) | $P_{interaction}$ |
| Total                                                                | 26             | 0.78 (0.75-0.81) | < 0.001  | 0.021               | 35.6      | NA                |
| <b>Participants region</b>                                           | 26             |                  |          |                     |           | 0.905             |
| North America                                                        | 13             | 0.77 (0.73-0.82) | < 0.001  | 0.048               | 39.5      |                   |
| Europe                                                               | 0              | NA               | NA       | NA                  | NA        |                   |
| Asia                                                                 | 9              | 0.78 (0.71-0.87) | < 0.001  | 0.165               | 21.7      |                   |
| Multiple nations                                                     | 4              | 0.79 (0.71-0.88) | < 0.001  | 0.048               | 58.3      |                   |
| <b>Sex<sup>a</sup></b>                                               | 34             |                  |          |                     |           | 0.284             |
| Male                                                                 | 9              | 0.81(0.76-0.87)  | < 0.001  | 0.337               | 11.7      |                   |
| Female                                                               | 17             | 0.77 (0.73-0.81) | < 0.001  | 0.055               | 37.5      |                   |
| Both <sup>b</sup>                                                    | 8              | 0.70 (0.57-0.85) | < 0.001  | 0.067               | 45.3      |                   |
| <b>BMI (kg/m<sup>2</sup>)</b>                                        | 26             |                  |          |                     |           | 0.716             |
| ≥ 25                                                                 | 12             | 0.75 (0.69-0.81) | < 0.001  | 0.135               | 31        |                   |
| < 25                                                                 | 11             | 0.78 (0.74-0.83) | < 0.001  | 0.022               | 45.4      |                   |
| Unknown                                                              | 3              | 0.81 (0.76-0.86) | < 0.001  | 0.586               | 0         |                   |
| <b>Follow-up duration (y)</b>                                        | 26             |                  |          |                     |           | 0.150             |
| ≥ 10                                                                 | 12             | 0.80 (0.76-0.84) | < 0.001  | 0.047               | 38.8      |                   |
| < 10                                                                 | 14             | 0.74 (0.68-0.80) | < 0.001  | 0.164               | 25.2      |                   |
| <b>Dietary assessment</b>                                            | 26             |                  |          |                     |           | 0.281             |
| FFQ/validated FFQ                                                    | 15             | 0.77 (0.73-0.82) | < 0.001  | 0.159               | 23.7      |                   |
| SFFQ/validated SFFQ                                                  | 9              | 0.79 (0.74-0.84) | < 0.001  | 0.017               | 52.5      |                   |
| Other                                                                | 2              | 0.55 (0.36-0.83) | 0.005    | 0.826               | 0         |                   |
| <b>Magnesium intake type<sup>c</sup></b>                             | 28             |                  |          |                     |           | 0.335             |
| Total magnesium intake <sup>d</sup>                                  | 15             | 0.79 (0.75-0.84) | < 0.001  | 0.035               | 39.8      |                   |
| Dietary magnesium intake                                             | 13             | 0.77 (0.72-0.82) | < 0.001  | 0.166               | 25.0      |                   |
| <b>Total energy adjustment</b>                                       | 26             |                  |          |                     |           | 0.396             |
| Yes                                                                  | 17             | 0.79 (0.74-0.84) | < 0.001  | 0.027               | 40.4      |                   |
| No                                                                   | 9              | 0.76 (0.72-0.81) | < 0.001  | 0.225               | 21.6      |                   |
| <b>Difference between top and bottom intake (mg/day)<sup>e</sup></b> | 27             |                  |          |                     |           | 0.671             |
| ≥ 140                                                                | 13             | 0.78 (0.74-0.83) | < 0.001  | 0.020               | 45.3      |                   |
| < 140                                                                | 14             | 0.77 (0.72-0.82) | < 0.001  | 0.209               | 21.0      |                   |
| <b>Current CV events status<sup>f</sup></b>                          | 26             |                  |          |                     |           | 0.536             |
| Yes                                                                  | 13             | 0.79 (0.74-0.83) | < 0.001  | 0.049               | 37.9      |                   |
| Unknown                                                              | 13             | 0.77 (0.71-0.82) | < 0.001  | 0.082               | 35.1      |                   |
| <b>Hypercholesterolemia status<sup>g</sup></b>                       | 26             |                  |          |                     |           | 0.625             |
| Yes                                                                  | 5              | 0.79 (0.73-0.85) | < 0.001  | 0.021               | 57.5      |                   |
| Unknown                                                              | 21             | 0.77 (0.73-0.82) | < 0.001  | 0.096               | 27.3      |                   |
| <b>Family diabetes history</b>                                       | 26             |                  |          |                     |           | 0.168             |
| Yes                                                                  | 17             | 0.76 (0.72-0.80) | < 0.001  | 0.021               | 41.8      |                   |
| Unknown                                                              | 9              | 0.81 (0.76-0.87) | < 0.001  | 0.258               | 14.3      |                   |

**Abbreviation:** T2D, type 2 diabetes; BMI, body mass index; FFQ, food frequency questionnaire; SFFQ, semi-quantitative food frequent questionnaire; RR, relative risk; ES, effect size; CV events, cardiovascular events.

<sup>a</sup>, Male and female of T2D outcome were treated as independent cohorts within eight studies;

<sup>b</sup>, Male and female participants were in independent cohorts;

765 <sup>c</sup>, Two studies reported total magnesium and dietary magnesium intake outcome;

766 <sup>d</sup>, Total magnesium intake (milligrams per day) included the total amount of magnesium from both food (diet) and supplement;

767 <sup>e</sup>, Subtract the lowest category intake from the highest. Oba et al (M) was in < 140 group, while Oba et al (F) was in ≥ 140 group;

768 <sup>f</sup>, Grouped by whether participants with or without CV events. CV events in this part include coronary heart disease, heart failure,  
769 stroke, atrial fibrillation, and self-reported heart disease etc;

770 <sup>g</sup>, Grouped by whether participants with or without hypercholesterolemia. Hypercholesterolemia in this part means cholesterol  
771 concentration ≥ 240 mg/dL.

For peer review only

772 **Table 2.** Subgroup Analyses Relating to Magnesium Intake and Total Stroke, Ischemic Stroke, Hemorrhagic stroke.  
1

| Group                               | Total Stroke  |                     |                    |                          | Ischemic Stroke |                     |                    |                          | Hemorrhagic stroke |                  |                    |                          |
|-------------------------------------|---------------|---------------------|--------------------|--------------------------|-----------------|---------------------|--------------------|--------------------------|--------------------|------------------|--------------------|--------------------------|
|                                     | No.of studies | RR (95% CI)         | I <sup>2</sup> (%) | P <sub>interaction</sub> | No.of studies   | RR (95% CI)         | I <sup>2</sup> (%) | P <sub>interaction</sub> | No.of studies      | RR (95% CI)      | I <sup>2</sup> (%) | P <sub>interaction</sub> |
| Total                               | 15            | 0.89<br>(0.83-0.94) | 0.00               | NA                       | 12              | 0.88<br>(0.81-0.95) | 16.90              | NA                       | 8                  | 0.93 (0.82-1.06) | 0.461              | NA                       |
| <b>Participants region</b>          | 15            |                     |                    | 0.733                    | 12              |                     |                    | 0.584                    | 8                  |                  |                    | 0.873                    |
| North America                       | 6             | 0.87<br>(0.79-0.96) | 0.00               |                          | 5               | 0.85<br>(0.76-0.95) | 0.00               |                          | 4                  | 0.90 (0.71-1.15) | 0.00               |                          |
| Europe                              | 5             | 0.87<br>(0.77-0.98) | 14.80              |                          | 3               | 0.86<br>(0.78-0.95) | 0.00               |                          | 2                  | 0.99 (0.79-1.25) | 0.00               |                          |
| Asia                                | 4             | 0.90<br>(0.78-1.05) | 32.80              |                          | 4               | 0.93<br>(0.75-1.14) | 45.50              |                          | 2                  | 0.89 (0.66-1.21) | 53.40              |                          |
| Multiple nations                    | 0             | NA                  | NA                 |                          | 0               | NA                  | NA                 |                          | 0                  | NA               | NA                 |                          |
| <b>Sex<sup>a</sup></b>              | 18            |                     |                    | 0.031                    | 14              |                     |                    | 0.134                    | 10                 |                  |                    | 0.425                    |
| Male                                | 6             | 0.95(0.86-1.05)     | 0.00               |                          | 4               | 0.99<br>(0.82-1.19) | 52.80              |                          | 4                  | 0.97 (0.75-1.26) | 35.50              |                          |
| Female                              | 7             | 0.91<br>(0.83-0.99) | 0.00               |                          | 6               | 0.89<br>(0.79-1.00) | 0.00               |                          | 6                  | 0.88 (0.74-1.06) | 0.00               |                          |
| Both <sup>b</sup>                   | 5             | 0.74<br>(0.64-0.85) | 0.00               |                          | 4               | 0.76<br>(0.65-0.88) | 0.00               |                          | 0                  | NA               | NA                 |                          |
| <b>Mean BMI (kg/m<sup>2</sup>)</b>  | 15            |                     |                    | 0.606                    | 12              |                     |                    | 0.631                    | 8                  |                  |                    | 0.418                    |
| ≥ 25                                | 8             | 0.89<br>(0.82-0.96) | 0.00               |                          | 6               | 0.88<br>(0.81-0.96) | 0.00               |                          | 5                  | 0.97 (0.81-1.17) | 0.00               |                          |
| < 25                                | 5             | 0.89<br>(0.78-1.01) | 30.00              |                          | 5               | 0.87<br>(0.73-1.03) | 44.00              |                          | 3                  | 0.88 (0.69-1.12) | 39.30              |                          |
| Unknown                             | 2             | 0.80<br>(0.63-1.02) | 0.00               |                          | 1               | 0.76<br>(0.57-1.07) | NA                 |                          | 0                  | NA               | NA                 |                          |
| <b>Follow-up duration (y)</b>       | 15            |                     |                    | 0.798                    | 12              |                     |                    | 0.811                    | 8                  |                  |                    | 0.808                    |
| ≥ 12                                | 11            | 0.88<br>(0.82-0.94) | 5.30               |                          | 10              | 0.87<br>(0.80-0.95) | 19.10              |                          | 7                  | 0.93 (0.81-1.08) | 7.70               |                          |
| < 12                                | 4             | 0.90<br>(0.77-1.05) | 0.00               |                          | 2               | 0.86<br>(0.62-1.20) | 48.40              |                          | 1                  | 0.88 (0.57-1.36) | NA                 |                          |
| <b>Dietary assessment</b>           | 15            |                     |                    | 0.578                    | 12              |                     |                    | NA                       | 8                  |                  |                    | NA                       |
| FFQ/validated FFQ                   | 14            | 0.89<br>(0.83-0.95) | 3.80               |                          | 12              | 0.88<br>(0.81-0.95) | 16.90              |                          | 8                  | 0.93 (0.82-1.06) | 0.00               |                          |
| SFFQ/validated SFFQ                 | 0             | NA                  | NA                 |                          | 0               | NA                  | NA                 |                          | 0                  | NA               | NA                 |                          |
| Other                               | 1             | 0.81<br>(0.61-1.09) | 0.00               |                          | 0               | NA                  | NA                 |                          | 0                  | NA               | NA                 |                          |
| <b>Magnesium intake type</b>        | 15            |                     |                    | 0.865                    | 12              |                     |                    | 0.831                    | 8                  |                  |                    | 0.831                    |
| Total magnesium intake <sup>c</sup> | 8             | 0.89<br>(0.82-0.96) | 0.00               |                          | 6               | 0.87<br>(0.80-0.94) | 0.00               |                          | 5                  | 0.94 (0.79-1.12) | 0.00               |                          |
| Dietary magnesium                   |               | 0.88                | 0.44               |                          |                 | 0.89                | 35.40              |                          |                    | 0.91 (0.70-1.18) | 39.40              |                          |

|    |                                                                      |    |             |       |    |             |       |   |                  |       |
|----|----------------------------------------------------------------------|----|-------------|-------|----|-------------|-------|---|------------------|-------|
| 1  | intake                                                               | 7  | (0.81-0.96) |       | 6  | (0.77-1.03) |       | 3 |                  |       |
| 2  | <b>Total energy adjustment</b>                                       | 15 |             | 0.888 | 12 |             | 0.689 | 8 |                  | 0.538 |
| 3  |                                                                      |    | 0.87        |       |    | 0.86        |       |   |                  |       |
| 4  | Yes                                                                  | 5  | (0.77-0.99) | 27.00 | 2  | (0.78-0.94) | 0.00  | 2 | 0.93 (0.82-1.06) | 0.00  |
| 5  | No                                                                   | 10 | 0.89        | 0.00  | 10 | 0.88        | 26.60 | 6 | 0.90 (0.76-1.07) | 11.40 |
| 6  | <b>Difference between top and bottom intake (mg/day)<sup>d</sup></b> |    | (0.83-0.96) |       |    | (0.79-0.99) |       |   |                  |       |
| 7  |                                                                      | 15 |             | 0.107 | 12 |             | 0.180 | 8 |                  | 0.244 |
| 8  |                                                                      |    |             |       |    |             |       |   |                  |       |
| 9  | ≥ 180                                                                | 7  | 0.83        | 0.00  | 5  | 0.83        | 0.00  | 6 | 1.07 (0.83-1.37) | 0.00  |
| 10 |                                                                      |    | (0.76-0.91) |       |    | (0.76-0.91) |       |   |                  |       |
| 11 | < 180                                                                | 8  | 0.93        | 0.00  | 7  | 0.92        | 26.20 | 2 | 0.89 (0.76-1.03) | 0.00  |
| 12 |                                                                      |    | (0.86-1.00) |       |    | (0.81-1.03) |       |   |                  |       |
| 13 | <b>Current CV events status<sup>e</sup></b>                          |    |             | 0.074 | 12 |             | 0.393 | 8 |                  | NA    |
| 14 | Yes                                                                  | 12 | 0.90        | 0.00  | 11 | 0.88        | 18.20 | 8 | 0.93 (0.82-1.06) | 0.00  |
| 15 |                                                                      |    | (0.85-0.96) |       |    | (0.81-0.96) |       |   |                  |       |
| 16 | Unknown                                                              | 3  | 0.75        | 0.00  | 1  | 0.76        | NA    | 0 | NA               | NA    |
| 17 |                                                                      |    | (0.63-0.90) |       |    | (0.57-1.01) |       |   |                  |       |
| 18 | <b>Hypercholesterolemia status<sup>f</sup></b>                       |    |             | 0.480 | 12 |             | 0.565 | 8 |                  | 0.651 |
| 19 | Yes                                                                  | 7  | 0.91        | 0.00  | 6  | 0.90        | 6.90  | 5 | 0.90 (0.76-1.08) | 0.00  |
| 20 |                                                                      |    | (0.83-0.99) |       |    | (0.80-1.01) |       |   |                  |       |
| 21 | Unknown                                                              | 8  | 0.86        | 13.10 | 6  | 0.86        | 32.40 | 3 | 0.94 (0.72-1.22) | 40.30 |
| 22 |                                                                      |    | (0.79-0.95) |       |    | (0.77-0.97) |       |   |                  |       |
| 23 | <b>Current diabetes status<sup>g</sup></b>                           |    |             | 0.039 | 12 |             | 0.159 | 8 |                  | NA    |
| 24 | Yes                                                                  | 10 | 0.91        | 0.00  | 10 | 0.89        | 13.50 | 8 | 0.93 (0.82-1.06) | 0.00  |
| 25 |                                                                      |    | (0.82-0.97) |       |    | (0.82-0.97) |       |   |                  |       |
| 26 | Unknown                                                              | 5  | 0.75        | 0.00  | 2  | 0.72        | 0.00  | 0 | NA               | NA    |
| 27 |                                                                      |    | (0.64-0.88) |       |    | (0.56-0.92) |       |   |                  |       |

**Abbreviation:** BMI, body mass index; FFQ, food frequency questionnaire; SFFQ, semi-quantitative food frequency questionnaire; CV events, cardiovascular events; RR, relative risk; NA, not available.

<sup>a</sup>, several studies reported stroke outcome of male and female participants in different cohorts;

<sup>b</sup>, male and female participants were in the same cohort;

<sup>c</sup>, total magnesium intake (milligrams per day) included the total amount of magnesium from both food (diet) and supplements;

<sup>d</sup>, subtract the lowest category intake from the highest;

<sup>e</sup>, grouped by whether participants with or without CV events. CV events in this part include coronary heart disease, heart failure, atrial fibrillation, and self-reported heart disease etc., stroke is not included;

<sup>f</sup>, grouped by whether participants with or without hypercholesterolemia. Hypercholesterolemia in this part means cholesterol concentration ≥ 240 mg/dL;

<sup>g</sup>, grouped by whether participants with or without diabetes.

1  
2  
3 **774 Figure Legends**  
4

5 **775 Figure 1.** Flow Chart for Literature Search and Screening Process  
6

7 **776 Figure 2.** Forest Plots for Risk of Type 2 Diabetes (T2D) for Magnesium Intake (A)  
8 and for < 50 mg/day (B),  $\geq 50$  and < 100 mg/day (C),  $\geq 100$  and < 150 mg/day (D) and  
9  
10  $\geq 150$  mg/day Magnesium increments (E).  
11  
12  
13

14 **779 Figure 3.** Two-Stage Dose-Response Effect on the Relationships between Magnesium  
15 Intake and Type 2 Diabetes (T2D) (A), Total Stroke (B), Ischemic Stroke (C) and  
16  
17  
18  
19  
20  
21  
22  
23  
24  
25  
26  
27  
28  
29  
30  
31  
32  
33  
34  
35  
36  
37  
38  
39  
40  
41  
42  
43  
44  
45  
46  
47  
48  
49  
50  
51  
52  
53  
54  
55  
56  
57  
58  
59  
60  
780 Hemorrhagic Stroke (D).  
781

1  
2  
3 782 **Supplementary material online:**  
4

5 783 **Table S1.** PRISMA 2009 Checklist  
6

7 784 **Table S2.** MOOSE Checklist  
8

9 785 **Table S3.** The complete search terms for Pubmed  
10

11 786 **Table S4.** Summary of Baseline Characteristics of Included Studies  
12

13 787 **Table S5.** Methodological Quality Assessments Of Studies Included With  
14  
15  
16  
17 788 Newcastle-Ottawa Scales

18 789 **Figure S1.** Funnel Plots for Magnesium Intake and Type 2 Diabetes (A), Ischemic  
19  
20  
21 790 Stroke (B) and Hemorrhagic Stroke (C).  
22

23 791 **Figure S2.** Forest Plots for Risk of Total Stroke for Magnesium Intake (A) and for <  
24  
25  
26 792 50 mg/day (B),  $\geq 50$  and < 100 mg/day (C),  $\geq 100$  and <150 mg/day (D) and  $\geq 150$   
27  
28 793 mg/day Magnesium increments (E).  
29

30 794 **Figure S3.** Forest Plots for Risk of Ischemic Stroke for Magnesium Intake (A) and for  
31  
32  
33 795 < 50 mg/day (B),  $\geq 50$  and < 100 mg/day (C),  $\geq 100$  and <150 mg/day (D) and  $\geq 150$   
34  
35 796 mg/day Magnesium increments (E).  
36

37 797 **Figure S4.** Forest Plots for Risk of Hemorrhagic Stroke for Magnesium Intake (A)  
38  
39  
40 798 and for < 50 mg/day (B),  $\geq 50$  and < 100 mg/day (C),  $\geq 100$  and <150 mg/day (D) and  
41  
42 799  $\geq 150$  mg/day Magnesium increments (E).  
43

44 800 **Figure S5.** Forest Plots for Risk of Subarachnoid Hemorrhage for Magnesium Intake  
45  
46  
47 801 (A) and for < 50 mg/day (B),  $\geq 50$  and < 100 mg/day (C),  $\geq 100$  and <150 mg/day (D)  
48  
49 802 and  $\geq 150$  mg/day Magnesium increments (E)  
50

51 803 **Figure S6.** Forest Plots for Risk of Intracerebral Hemorrhage for Magnesium Intake  
52  
53  
54 804 (A) and for < 50 mg/day (B),  $\geq 50$  and < 100 mg/day (C),  $\geq 100$  and <150 mg/day (D)  
55  
56 805 and  $\geq 150$  mg/day Magnesium increments (E)  
57

58 806 **Figure S7.** Meta-Regression of Relative Risk for Type 2 Diabetes According to Body  
59  
60



1  
2  
3 807 Mass Index (A,  $P = 0.716$ ), Sex (B,  $P = 0.284$ ), Participant Region (C,  $P = 0.904$ ) and  
4  
5 808 Dietary Assessment (D,  $P = 0.521$ ).

6  
7  
8 809 **Figure S8.** Meta-Regression of Relative Risk for Total Stroke According to Body  
9  
10 810 Mass Index (A,  $P = 0.606$ ), Sex (B,  $P = 0.112$ ), Participant region (C,  $P = 0.891$ ) and  
11  
12 811 Dietary Assessment (D,  $P = 0.891$ ).

13  
14  
15 812 **Figure S9.** Meta-Regression of Relative Risk for Ischemic Stroke According to Body  
16  
17 813 Mass Index (A,  $P = 0.631$ ), Sex (B,  $P = 0.134$ ), Participant Region (C,  $P = 0.584$ ) and  
18  
19 814 Dietary Assessment (D, no regression  $P$ -value due to limited data).

20  
21 815 **Figure S10.** Meta-Regression of Relative Risk for Hemorrhagic Stroke According to  
22  
23 816 Body Mass Index (A,  $P = 0.418$ ), Sex (B,  $P = 0.872$ ), Participant Region (C,  $P =$   
24  
25 817  $0.872$ ) and Dietary Assessment (D, no regression  $P$ -value due to limited data).

26  
27  
28 818 **Figure S11.** Cumulative Meta-Analysis Related to Magnesium Intake and Type 2  
29  
30 819 Diabetes (T2D)

31  
32  
33 820 **Figure S12.** Cumulative Meta-Analysis Related to Magnesium Intake and Total  
34  
35 821 Stroke

36  
37  
38 822 **Figure S13.** Cumulative Meta-Analysis Related to Magnesium Intake and Ischemic  
39  
40 823 Stroke

41  
42 824 **Figure S14.** Cumulative Meta-Analysis Related to Magnesium Intake and  
43  
44 825 Hemorrhagic Stroke

45  
46  
47 826 **Figure S15.** Dose-Response Effect on the Relationships between Magnesium Intake  
48  
49 827 and Subarachnoid Hemorrhage (A) and Intracerebral Hemorrhage (B).

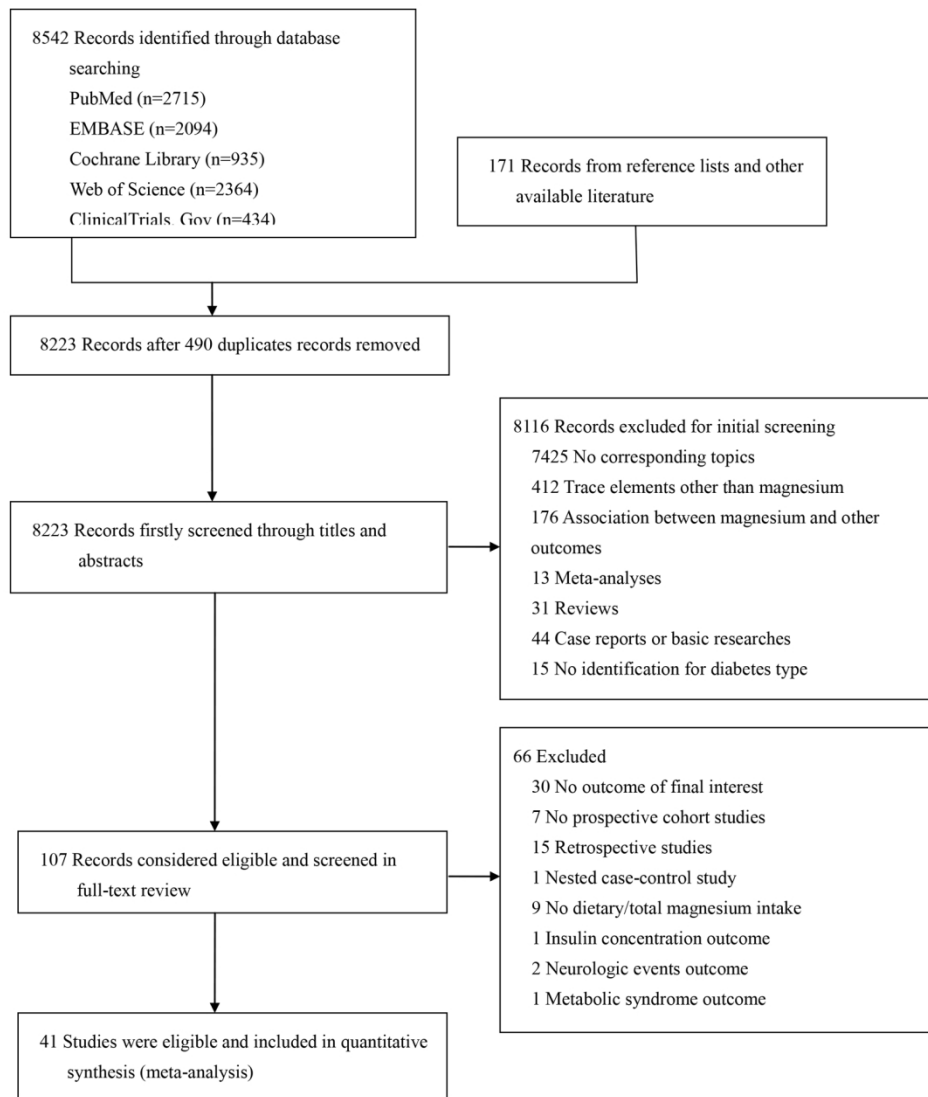

Figure 1. Flow Chart for Literature Search and Screening Process

1  
2  
3  
4  
5  
6  
7  
8  
9  
10  
11  
12  
13  
14  
15  
16  
17  
18  
19  
20  
21  
22  
23  
24  
25  
26  
27  
28  
29  
30  
31  
32  
33  
34  
35  
36  
37  
38  
39  
40  
41  
42  
43  
44  
45  
46  
47  
48  
49  
50  
51  
52  
53  
54  
55  
56  
57  
58  
59  
60

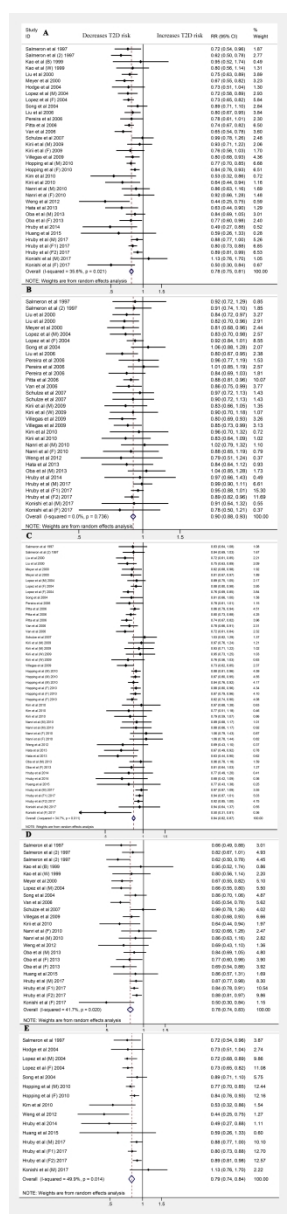

Figure 2. Forest Plots for Risk of Type 2 Diabetes (T2D) for Magnesium Intake (A) and for < 50 mg/day (B), ≥ 50 and < 100 mg/day (C), ≥ 100 and < 150 mg/day (D) and ≥ 150 mg/day Magnesium increments (E).



Figure 3. Two-Stage Dose-Response Effect on the Relationships between Magnesium Intake and Type 2 Diabetes (T2D) (A), Total Stroke (B), Ischemic Stroke (C) and Hemorrhagic Stroke (D).



Table S1 PRISMA 2009 Checklist

| Section/topic                      | #  | Checklist item                                                                                                                                                                                                                                                                                              | Reported on page # |
|------------------------------------|----|-------------------------------------------------------------------------------------------------------------------------------------------------------------------------------------------------------------------------------------------------------------------------------------------------------------|--------------------|
| <b>TITLE</b>                       |    |                                                                                                                                                                                                                                                                                                             | <b>1</b>           |
| Title                              | 1  | Identify the report as a systematic review, meta-analysis, or both.                                                                                                                                                                                                                                         | 1                  |
| <b>ABSTRACT</b>                    |    |                                                                                                                                                                                                                                                                                                             | <b>2-3</b>         |
| Structured summary                 | 2  | Provide a structured summary including, as applicable: background; objectives; data sources; study eligibility criteria, participants, and interventions; study appraisal and synthesis methods; results; limitations; conclusions and implications of key findings; systematic review registration number. | 2-3                |
| <b>INTRODUCTION</b>                |    |                                                                                                                                                                                                                                                                                                             | <b>4-5</b>         |
| Rationale                          | 3  | Describe the rationale for the review in the context of what is already known.                                                                                                                                                                                                                              | 4                  |
| Objectives                         | 4  | Provide an explicit statement of questions being addressed with reference to participants, interventions, comparisons, outcomes, and study design (PICOS).                                                                                                                                                  | 4-5                |
| <b>METHODS</b>                     |    |                                                                                                                                                                                                                                                                                                             | <b>5-9</b>         |
| Protocol and registration          | 5  | Indicate if a review protocol exists, if and where it can be accessed (e.g., Web address), and, if available, provide registration information including registration number.                                                                                                                               | 5                  |
| Eligibility criteria               | 6  | Specify study characteristics (e.g., PICOS, length of follow-up) and report characteristics (e.g., years considered, language, publication status) used as criteria for eligibility, giving rationale.                                                                                                      | 5-6                |
| Information sources                | 7  | Describe all information sources (e.g., databases with dates of coverage, contact with study authors to identify additional studies) in the search and date last searched.                                                                                                                                  | 5-6                |
| Search                             | 8  | Present full electronic search strategy for at least one database, including any limits used, such that it could be repeated.                                                                                                                                                                               | 5-6                |
| Study selection                    | 9  | State the process for selecting studies (i.e., screening, eligibility, included in systematic review, and, if applicable, included in the meta-analysis).                                                                                                                                                   | 5-6                |
| Data collection process            | 10 | Describe method of data extraction from reports (e.g., piloted forms, independently, in duplicate) and any processes for obtaining and confirming data from investigators.                                                                                                                                  | 6                  |
| Data items                         | 11 | List and define all variables for which data were sought (e.g., PICOS, funding sources) and any assumptions and simplifications made.                                                                                                                                                                       | 6                  |
| Risk of bias in individual studies | 12 | Describe methods used for assessing risk of bias of individual studies (including specification of whether this was done at the study or outcome level), and how this information is to be used in any data synthesis.                                                                                      | 6                  |
| Summary measures                   | 13 | State the principal summary measures (e.g., risk ratio, difference in means).                                                                                                                                                                                                                               | 6                  |
| Synthesis of results               | 14 | Describe the methods of handling data and combining results of studies, if done, including measures of consistency (e.g., $I^2$ ) for each meta-analysis.                                                                                                                                                   | 6-10               |



# Table S1 PRISMA 2009 Checklist

Page 1 of 2

| Section/topic                 | #  | Checklist item                                                                                                                                                                                           | Reported on page # |
|-------------------------------|----|----------------------------------------------------------------------------------------------------------------------------------------------------------------------------------------------------------|--------------------|
| Risk of bias across studies   | 15 | Specify any assessment of risk of bias that may affect the cumulative evidence (e.g., publication bias, selective reporting within studies).                                                             | 7                  |
| Additional analyses           | 16 | Describe methods of additional analyses (e.g., sensitivity or subgroup analyses, meta-regression), if done, indicating which were pre-specified.                                                         | 8-9                |
| <b>RESULTS</b>                |    |                                                                                                                                                                                                          | <b>9-16</b>        |
| Study selection               | 17 | Give numbers of studies screened, assessed for eligibility, and included in the review, with reasons for exclusions at each stage, ideally with a flow diagram.                                          | 9                  |
| Study characteristics         | 18 | For each study, present characteristics for which data were extracted (e.g., study size, PICOS, follow-up period) and provide the citations.                                                             | 9-10               |
| Risk of bias within studies   | 19 | Present data on risk of bias of each study and, if available, any outcome level assessment (see item 12).                                                                                                | 9-10               |
| Results of individual studies | 20 | For all outcomes considered (benefits or harms), present, for each study: (a) simple summary data for each intervention group (b) effect estimates and confidence intervals, ideally with a forest plot. | 10-16              |
| Synthesis of results          | 21 | Present results of each meta-analysis done, including confidence intervals and measures of consistency.                                                                                                  | 10-16              |
| Risk of bias across studies   | 22 | Present results of any assessment of risk of bias across studies (see Item 15).                                                                                                                          | 10-16              |
| Additional analysis           | 23 | Give results of additional analyses, if done (e.g., sensitivity or subgroup analyses, meta-regression [see Item 16]).                                                                                    | 10-16              |
| <b>DISCUSSION</b>             |    |                                                                                                                                                                                                          | <b>16-22</b>       |
| Summary of evidence           | 24 | Summarize the main findings including the strength of evidence for each main outcome; consider their relevance to key groups (e.g., healthcare providers, users, and policy makers).                     | 16-22              |
| Limitations                   | 25 | Discuss limitations at study and outcome level (e.g., risk of bias), and at review-level (e.g., incomplete retrieval of identified research, reporting bias).                                            | 21-22              |
| Conclusions                   | 26 | Provide a general interpretation of the results in the context of other evidence, and implications for future research.                                                                                  | 22                 |
| <b>FUNDING</b>                |    |                                                                                                                                                                                                          | <b>23</b>          |
| Funding                       | 27 | Describe sources of funding for the systematic review and other support (e.g., supply of data); role of funders for the systematic review.                                                               | 23                 |

From: Moher D, Liberati A, Tetzlaff J, Altman DG, The PRISMA Group (2009). Preferred Reporting Items for Systematic Reviews and Meta-Analyses: The PRISMA Statement. PLoS Med 6(7): e1000097. doi:10.1371/journal.pmed1000097

For more information, visit: [www.prisma-statement.org](http://www.prisma-statement.org).

Page 2 of 2

For peer review only - <http://bmjopen.bmj.com/site/about/guidelines.xhtml>

**Table S2. MOOSE Checklist****MOOSE Checklist for Meta-analyses of Observational Studies**

| Item No                                     | Recommendation                                                                                                                             | Reported on Page No |
|---------------------------------------------|--------------------------------------------------------------------------------------------------------------------------------------------|---------------------|
| Reporting of background should include      |                                                                                                                                            |                     |
| 1                                           | Problem definition                                                                                                                         | 4                   |
| 2                                           | Hypothesis statement                                                                                                                       | 4                   |
| 3                                           | Description of study outcome(s)                                                                                                            | 5                   |
| 4                                           | Type of exposure or intervention used                                                                                                      | 5                   |
| 5                                           | Type of study designs used                                                                                                                 | 5                   |
| 6                                           | Study population                                                                                                                           | 4-5                 |
| Reporting of search strategy should include |                                                                                                                                            |                     |
| 7                                           | Qualifications of searchers (eg, librarians and investigators)                                                                             | 6-7                 |
| 8                                           | Search strategy, including time period included in the synthesis and key words                                                             | 5-6                 |
| 9                                           | Effort to include all available studies, including contact with authors                                                                    | 5-6                 |
| 10                                          | Databases and registries searched                                                                                                          | 5-6                 |
| 11                                          | Search software used, name and version, including special features used (eg, explosion)                                                    | 5-6                 |
| 12                                          | Use of hand searching (eg, reference lists of obtained articles)                                                                           | 5-6                 |
| 13                                          | List of citations located and those excluded, including justification                                                                      | 6                   |
| 14                                          | Method of addressing articles published in languages other than English                                                                    | 6                   |
| 15                                          | Method of handling abstracts and unpublished studies                                                                                       | 6                   |
| 16                                          | Description of any contact with authors                                                                                                    | 6                   |
| Reporting of methods should include         |                                                                                                                                            |                     |
| 17                                          | Description of relevance or appropriateness of studies assembled for assessing the hypothesis to be tested                                 | 7-8                 |
| 18                                          | Rationale for the selection and coding of data (eg, sound clinical principles or convenience)                                              | 6-7                 |
| 19                                          | Documentation of how data were classified and coded (eg, multiple raters, blinding and interrater reliability)                             | 6-7                 |
| 20                                          | Assessment of confounding (eg, comparability of cases and controls in studies where appropriate)                                           | 7-9                 |
| 21                                          | Assessment of study quality, including blinding of quality assessors, stratification or regression on possible predictors of study results | 7-9                 |
| 22                                          | Assessment of heterogeneity                                                                                                                | 7-9                 |
| 23                                          | Description of statistical methods (eg, complete description of fixed                                                                      | 7-9                 |

|                                     |                                                                                                                                                                                                        |                    |
|-------------------------------------|--------------------------------------------------------------------------------------------------------------------------------------------------------------------------------------------------------|--------------------|
|                                     | or random effects models, justification of whether the chosen models account for predictors of study results, dose-response models, or cumulative meta-analysis) in sufficient detail to be replicated |                    |
| 24                                  | Provision of appropriate tables and graphics                                                                                                                                                           | 9                  |
| Reporting of results should include |                                                                                                                                                                                                        |                    |
| 25                                  | Graphic summarizing individual study estimates and overall estimate                                                                                                                                    | 10-14              |
| 26                                  | Table giving descriptive information for each study included                                                                                                                                           | 10-11,<br>Table S4 |
| 27                                  | Results of sensitivity testing (eg, subgroup analysis)                                                                                                                                                 | 14                 |
| 28                                  | Indication of statistical uncertainty of findings                                                                                                                                                      | 16                 |

| Item No                                 | Recommendation                                                                                                            | Reported on Page No |
|-----------------------------------------|---------------------------------------------------------------------------------------------------------------------------|---------------------|
| Reporting of discussion should include  |                                                                                                                           |                     |
| 29                                      | Quantitative assessment of bias (eg, publication bias)                                                                    | 11-14               |
| 30                                      | Justification for exclusion (eg, exclusion of non-English language citations)                                             | 10                  |
| 31                                      | Assessment of quality of included studies                                                                                 | 11, Table S5        |
| Reporting of conclusions should include |                                                                                                                           |                     |
| 32                                      | Consideration of alternative explanations for observed results                                                            | 16-22               |
| 33                                      | Generalization of the conclusions (ie, appropriate for the data presented and within the domain of the literature review) | 16, 23              |
| 34                                      | Guidelines for future research                                                                                            | 17-20, 22           |
| 35                                      | Disclosure of funding source                                                                                              | None                |



**Table S3. The complete search terms for Pubmed**

**A search example for Pubmed**

The combined text and medical subject heading (MeSH) terms used were: “Magnesium” and “Magnesium Supplementation” “Diabetes Mellitus, Type 2”, “Stroke”, “Cerebrovascular Stroke”, and “Cohort Studies”. The complete search terms for PubMed included: (Magnesium [MeSH terms]) AND (Magnesium Supplementation [MeSH terms]) AND (Diabetes Mellitus, Type 2 [MeSH term] OR Diabetes Mellitus, Noninsulin-Dependent [Text Word] OR Diabetes Mellitus, Ketosis-Resistant [Text Word] OR Diabetes Mellitus, Non-Insulin-Dependent [Text Word] OR Non-Insulin-Dependent Diabetes Mellitus [Text Word] OR Diabetes Mellitus, Stable [Text Word] OR NIDDM [Text Word] OR Maturity-Onset Diabetes Mellitus [Text Word] OR Diabetes Mellitus, Slow-Onset [Text Word] OR Type 2 Diabetes [Text Word] OR Diabetes Mellitus, Adult-Onset [Text Word]) AND (Stroke [MeSH terms] OR Cerebrovascular Stroke [Text Word] OR Cerebrovascular Accident [Text Word] OR CVA (Cerebrovascular Accident) [Text Word] OR Vascular Accident, Brain [Text Word] OR Cerebrovascular Apoplexy [Text Word] OR Cerebral Stroke [Text Word] OR Stroke, Acute [Text Word] OR Cerebrovascular Accident, Acute [Text Word] OR Acute Cerebrovascular Accident [Text Word] OR Apoplexy, Cerebrovascular [Text Word]) AND (Cohort Studies [MeSH term] OR Cohort Study [Text Word] OR Studies, Cohort [Text Word] OR Study, Cohort [Text Word] OR Concurrent Studies [Text Word] OR Studies, Concurrent [Text Word] OR Closed Cohort Studies [Text Word] OR Closed Cohort Study [Text Word] OR Study, Closed Cohort [Text Word] OR Cohort Analysis [Text Word] OR Cohort Analysis [Text Word] OR Prospective Studies [Text Word] OR Prospective Study [Text Word] OR Studies, Prospective [Text Word])

**Table S4** Summary of Baseline Characteristics of Included Studies

| Source                         | Nation   | Period                       | Population               | BMI          | Dietary Assessment | Case Ascertainment                               | Case (Cohort size)                             | Magnesium intake (mg/day)<br>highest VS. the lowest<br>[Adjusted RR (95% CI)] |
|--------------------------------|----------|------------------------------|--------------------------|--------------|--------------------|--------------------------------------------------|------------------------------------------------|-------------------------------------------------------------------------------|
| Salmeron 1997 <sup>11</sup>    | USA      | 1986-1992                    | M; 40-75 y               | 25.5         | validated SFFQ     | self-reported questionnaire                      | 523 T2D (42759)                                | 461 VS. 262 (0.72 (0.54-0.96))                                                |
| Salmeron 1997(2) <sup>12</sup> | USA      | 1986-1992                    | F; 40-65 y               | 25.1         | validated SFFQ     | self-reported questionnaire                      | 915 T2D (65173)                                | 338 VS. 222 (0.62 (0.50-0.78))                                                |
| Ascherio 1998 <sup>13</sup>    | USA      | 1986-1994                    | M; 40-75 y               | NA           | validated FFQ      | self-reported questionnaire                      | 328 stroke (43738)                             | 425 VS. 243 (0.92 (0.58-1.46))                                                |
| Iso 1999 <sup>14</sup>         | USA      | 1980-1994                    | F; 34-59 y               | 22.7         | FFQ                | self-reported questionnaire                      | 690 stroke (85764)                             | 381 VS. 211 (0.80 (0.63-1.01))                                                |
| Kao 1999 <sup>15</sup>         | USA      | NA                           | M/F; 45-64 y             | 27.2         | FFQ                | self-reported questionnaire                      | black: 367 T2D (2622)<br>white: 739 T2D (9506) | 374 VS. 264 (0.95 (0.52-1.74))<br>418 VS. 308 (0.80 (0.56-1.14))              |
| Liu 2000 <sup>16</sup>         | USA      | 1976-1984                    | F; 38-63 y               | 24.8         | validated FFQ      | self-reported questionnaire                      | 1879 T2D (75521)                               | 342 VS. 248 (0.75 (0.63-0.89))                                                |
| Meyer 2000 <sup>17</sup>       | USA      | 1986-1992                    | F; 55-69 y               | 26.8         | validated FFQ      | self-reported questionnaire                      | 1141 T2D (35998)                               | 362 VS. 220 (0.67 (0.55-0.82))                                                |
| Hodge 2004 <sup>18a</sup>      | multiple | 1990-1994                    | M/F; 45-64 y             | 26.1         | validated FFQ      | self-reported questionnaire                      | 365 T2D (31641)                                | 500 increment per day                                                         |
| Lopez 2004 <sup>19</sup>       | USA      | M: 1986-1998<br>W: 1980-1998 | M; 40-75 y<br>F; 30-35 y | 25.4<br>24.3 | validated SFFQ     | self-reported questionnaire                      | 1333 T2D (42872)<br>4085 T2D (85060)           | 457 VS. 314 (0.72 (0.58-0.89))<br>373 VS. 222 (0.73 (0.65-0.82))              |
| Song 2004 <sup>20</sup>        | USA      | 1993-2001                    | F; ≥45 y <sup>c</sup>    | 26           | SFFQ               | self-reported questionnaire                      | 918 T2D (38025)                                | 433 VS. 255 (0.89 (0.71-1.10))                                                |
| Song 2005 <sup>21</sup>        | USA      | 1993-2003                    | F; 39-89 y               | 26           | FFQ                | follow-up examination                            | 368 stroke (39876)                             | 433 VS. 255 (0.90 (0.65-1.26))                                                |
| Liu 2006 <sup>22</sup>         | USA      | 1996-2006                    | F; 47-63 y               | 25.8         | validated SFFQ     | self-reported questionnaire                      | 1603 T2D (37183)                               | 340 VS. 307 (0.80 (0.67-0.95))                                                |
| Pereira 2006 <sup>23</sup>     | USA      | 1986-1997                    | F; 56-66 y               | 26.7         | validated FFQ      | self-reported questionnaire                      | 1418 T2D (28812)                               | 334 VS. 281 (0.78(0.61-1.01))                                                 |
| Pittas 2006 <sup>24</sup>      | USA      | 1980-2000                    | F; 30-55 y               | 24.1         | validated SFFQ     | self-reported questionnaire                      | 4843 T2D (83779)                               | 352 VS. 258 (0.74 (0.67-0.82))                                                |
| Van 2006 <sup>25</sup>         | multiple | 1995-2003                    | F; 21-69 y               | 27.6         | validated FFQ      | self-reported questionnaire                      | 1964 T2D (41186)                               | 244 VS. 115 (0.65 (0.54-0.78))                                                |
| Schulze 2007 <sup>26</sup>     | multiple | 1994-2005                    | M/F; 35-65 y             | 26.1         | validated SFFQ     | self-reported questionnaire                      | 844 T2D (25067)                                | 377 VS. 268 (0.99 (0.78-1.26))                                                |
| Larsson 2008 <sup>27</sup>     | Sweden   | 1985-2004                    | M; 50-69 y               | 26.4         | validated FFQ      | follow-up examination                            | 3370 stroke (26556)                            | 575 VS. 382 (0.91 (0.77-1.07))                                                |
| Weng 2008 <sup>28</sup>        | Taipei   | 1989-2002                    | M/F; ≥40 y               | 24.5         | validated FFQ      | Self-reported and<br>cross-checked questionnaire | 132 ischemic stroke (1772)                     | 423 VS. 162 (0.69 (0.45-1.06))                                                |
| Kirii 2009 <sup>29</sup>       | Japan    | 1993-1998                    | M; 40-69 y<br>F; 40-69 y | 23.6<br>23.5 | FFQ                | self-reported questionnaire                      | 634 T2D (25876)<br>480 T2D (33919)             | 331 VS. 245 (0.93 (0.71-1.22))<br>314 VS. 248 (0.76 (0.56-1.03))              |
| Ohira 2009 <sup>30</sup>       | USA      | 1987-2004                    | M/F; 45-64 y             | 27.4         | validated FFQ      | follow-up examination                            | 577 ischemic stroke (14221)                    | 362 VS. 152 (0.80 (0.75-1.13))                                                |
| Villegas 2009 <sup>31</sup>    | China    | 2000-2006                    | F; 40-70 y               | 23.8         | validated FFQ      | follow-up examination                            | 2273 T2D (64191)                               | 318 VS. 214 (0.80 (0.68-0.93))                                                |
| Hopping 2010 <sup>32</sup>     | multiple | 1993-2007                    | M; 45-75 y<br>F; 45-75 y | NA           | validated FFQ      | self-reported questionnaire                      | 4555 T2D (36256)<br>4032 T2D (39256)           | 278 VS. 86 (0.77 (0.70-0.85))<br>300 VS. 93 (0.84 (0.76-0.93))                |
| Kim 2010 <sup>33</sup>         | USA      | 1985-2005                    | M/F; 18-30 y             | 24.5         | validated DHQ      | self-reported questionnaire                      | 330 T2D (4497)                                 | 302 VS. 182 (0.53 (0.32-0.86))                                                |
| Kirii 2010 <sup>34</sup>       | Japan    | NA                           | M/F; 40-65 y             | 22.9         | validated FFQ      | self-reported questionnaire                      | 459 T2D (17592)                                | 303 VS. 158 (0.64 (0.44-0.94))                                                |

|    |                                 |            |            |                |      |                              |                             |                             |                                |
|----|---------------------------------|------------|------------|----------------|------|------------------------------|-----------------------------|-----------------------------|--------------------------------|
| 1  | Nanri 2010 <sup>35</sup>        | Japan      | 1990-1995  | M; 40-65 y     | NA   | validated FFQ                | self-reported questionnaire | 634 T2D (25872)             | 348 VS. 213 (0.86 (0.63-1.16)) |
| 2  |                                 |            |            | F; 40-65 y     |      |                              |                             | 480 T2D (33919)             | 333 VS. 213 (0.92 (0.66-1.28)) |
| 3  | Larsson 2011 <sup>36</sup>      | Sweden     | 1998-2008  | F; 49-83 y     | 25   | validated FFQ                | follow-up examination       | 1680 stroke (34670)         | 373 VS. 297 (1.02 (0.82-1.27)) |
| 4  |                                 |            |            |                |      |                              | follow-up examination or    |                             |                                |
| 5  | Weng 2012 <sup>37</sup>         | Taipei     | 1993-2002  | M/F; ≥30 y     | 24   | validated FFQ                | self-reported questionnaire | 141 T2D (1604)              | 406 VS. 212 (0.44 (0.25-0.75)) |
| 6  |                                 |            |            |                |      |                              |                             |                             |                                |
| 7  | Zhang 2012 <sup>38</sup>        | Japan      | 1988-2006/ | M; 40-79 y     | 22.7 | validated FFQ                | follow-up examination       | 634 stroke (23083)          | 294 VS. 173 (1.03 (0.79-1.35)) |
| 8  |                                 |            |            | F; 40-79 y     | 22.9 |                              |                             | 620 stroke (35533)          | 274 VS. 175 (0.90 (0.69-1.16)) |
| 9  | Hata 2013 <sup>39</sup>         | Japan      | 1988-2009  | M/F; 40-79 y   | 22.9 | validated SFFQ               | self-reported questionnaire | 417 T2D (1999)              | 215 VS. 133 (0.63 (0.44-0.90)) |
| 10 |                                 |            |            |                |      |                              | follow-up examination and   |                             |                                |
| 11 | Lin 2013 <sup>40</sup>          | Taipei     | 1989-2002  | M/F; ≥ 18 y    | 23.3 | validated FFQ                | self-reported questionnaire | 123 stroke (2061)           | 378 VS. 210 (0.62 (0.40-0.97)) |
| 12 |                                 |            |            |                |      |                              |                             |                             |                                |
| 13 |                                 |            |            | M; 40-69 y     | 23.6 |                              |                             | 690 T2D (27769)             | 349 VS. 232 (0.84 (0.69-1.05)) |
| 14 | Oba 2013 <sup>41</sup>          | Japan      | 1990-2000  | F; 40-69 y     | 23.5 | validated FFQ                | self-reported questionnaire | 500 T2D (36864)             | 356 VS. 211 (0.69 (0.54-0.88)) |
| 15 |                                 |            |            |                |      |                              |                             |                             |                                |
| 16 | Sluijs 2013 <sup>42</sup>       | Netherland | NA         | M/F; 21-70 y   | NA   | FFQ                          | NA                          | 361 ischemic stroke (36359) | 435 VS. 253 (0.76 (0.57-1.01)) |
| 17 | Hruby 2014 <sup>43</sup>        | USA        | 1995-2001  | M/F; 26-81 y   | 27   | validated FFQ                | self-reported questionnaire | 179 T2D (2582)              | 395 VS. 235 (0.49 (0.27-0.88)) |
| 18 |                                 |            |            |                |      |                              |                             |                             |                                |
| 19 | Sluijs 2014 <sup>44</sup>       | Netherland | NA         | M/F; 21-70 y   | NA   | FFQ                          | follow-up examination       | 631 stroke (36094)          | 597 VS. 190 (0.64 (0.44-0.94)) |
| 20 | Adebamowo 2015 <sup>45</sup>    | USA        | 1986-2010  | M; 40-75 y     | 25.4 | validated FFQ                | self-reported questionnaire | 1547 stroke (42669)         | 467 VS. 267 (0.89 (0.71-1.11)) |
| 21 |                                 |            |            |                |      |                              |                             |                             |                                |
| 22 | Adebamowo 2015(2) <sup>46</sup> | USA        | 1976-2006  | F; 30-55 y     | 26.4 | validated FFQ                | self-reported questionnaire | 3237 stroke (86149)         | 411 VS. 233 (0.93 (0.79-1.08)) |
| 23 |                                 |            |            |                |      |                              |                             |                             |                                |
| 24 |                                 |            |            | F; 25-42 y     | 25.7 |                              |                             | 543 stroke (94715)          |                                |
| 25 | Bain 2015 <sup>47</sup>         | Britain    | 2002-2008  | M; 40-75 y     | 26.5 | 7-day diary recall           | follow-up examination       | 364 stroke (2000)           | 456 VS. 266 (0.81 (0.53-1.22)) |
| 26 |                                 |            |            | F; 40-75 y     | 26.2 |                              |                             | 511 stroke (2445)           | 374 VS. 456 (0.82 (0.54-1.24)) |
| 27 | Huang 2015 <sup>48</sup>        | Taipei     | 2000-2008  | M/F; ≥65 y     | NA   | 24 h dietary recall and SFFQ | follow-up examination       | 231 T2D (1400)              | 398 VS. 103 (0.59 (0.26-1.33)) |
| 28 |                                 |            |            |                |      |                              |                             |                             |                                |
| 29 |                                 |            |            | F; 30-55 y     | 24.8 |                              |                             | 7620 T2D (69176)            | 390 VS. 229 (0.80 (0.73-0.88)) |
| 30 | Hruby 2017 <sup>49</sup>        | USA        | 1991-2013  | F; 25-42 y     | 24.6 | validated SFFQ               | self-reported questionnaire | 6080 T2D (91471)            | 424 VS. 249 (0.89 (0.81-0.99)) |
| 31 |                                 |            |            |                |      |                              |                             |                             |                                |
| 32 |                                 |            |            | M; mean 53.5 y | 24.8 |                              |                             | 3430 T2D (42096)            | 469 VS. 280 (0.88 (0.77-1.00)) |
| 33 | Kokubo 2017 <sup>50b</sup>      | Japan      | 1990-2009  | M; 40-69 y     | 23.6 | FFQ                          | follow-up examination       | 2576 stroke (39505)         | 348 VS. 213 (1.07 (0.86-1.33)) |
| 34 |                                 |            |            |                |      |                              |                             |                             |                                |
| 35 |                                 |            |            | F; 40-69 y     | 23.6 |                              |                             | 1846 stroke (45788)         | 333 VS. 213 (0.88 (0.67-1.14)) |
| 36 | Konishi 2017 <sup>51</sup>      | Japan      | 1992-2002  | M; ≥35 y       | 22.6 | validated FFQ                | self-reported questionnaire | 266 T2D (5885)              | 469 VS. 310 (1.13 (0.76-1.70)) |
| 37 |                                 |            |            | F; ≥35 y       | 22.1 |                              |                             | 172 T2D (7640)              | 432 VS. 285 (0.50 (0.30-0.84)) |

37 Abbreviations: FFQ, food-frequency questionnaire; SFFQ, semi-quantitative food-frequency questionnaire; BMI, body mass index; T2D, type 2 diabetes; NA, not available.

38 <sup>a</sup>, different ethnicities of participants are in multiple nations cohort;

39 <sup>b</sup>, the dose of magnesium intake which is not available in this study is retrieved from the same cohort reported in former publication;

40 <sup>c</sup> the range of enrolled participants age is not mentioned.

41

42

43

44

45

46

**Table S5** Methodological Quality Assessments Of Included Studies With Newcastle-Ottwa Scales

|      | Study                             | Selection      |                   |                           |                     | Comparability | Outcome               |                     |                       | Total score |
|------|-----------------------------------|----------------|-------------------|---------------------------|---------------------|---------------|-----------------------|---------------------|-----------------------|-------------|
|      |                                   | Exposed cohort | Nonexposed cohort | Ascertainment of exposure | Outcome of interest |               | Assessment of outcome | Length of follow-up | Adequacy of follow-up |             |
| 1997 | Salmeron et al, <sup>11</sup>     | *              | *                 | *                         | *                   | **            | *                     | *                   |                       | 9           |
| 1997 | Salmeron et al (2), <sup>12</sup> | *              | *                 | *                         | *                   | **            | *                     | *                   | *                     | 9           |
| 1998 | Ascherio et al, <sup>13</sup>     | *              | *                 | *                         | *                   | **            | *                     | *                   | *                     | 9           |
| 1999 | Iso et al, <sup>14</sup>          | *              | *                 | *                         | *                   | **            | *                     | *                   | *                     | 9           |
| 1999 | Kao et al, <sup>15</sup>          | *              | *                 | *                         | *                   | **            | *                     | *                   | *                     | 9           |
| 2000 | Liu et al, <sup>16</sup>          | *              | *                 | *                         | *                   | **            | *                     | *                   | *                     | 9           |
| 2000 | Meyer et al, <sup>17</sup>        | *              | *                 | *                         | *                   | **            | *                     | *                   | *                     | 9           |
| 2004 | Hodge et al, <sup>18</sup>        | *              | *                 | *                         | *                   | *             | *                     | *                   |                       | 7           |
| 2004 | Lopez et al, <sup>19</sup>        | *              | *                 | *                         | *                   | **            | *                     | *                   | *                     | 9           |
| 2004 | Song et al, <sup>20</sup>         | *              | *                 | *                         | *                   | **            | *                     | *                   | *                     | 9           |
| 2005 | Song et al, <sup>21</sup>         | *              | *                 | *                         | *                   | **            | *                     | *                   | *                     | 9           |
| 2006 | Liu et al, <sup>22</sup>          | *              | *                 | *                         | *                   | **            | *                     | *                   | *                     | 9           |
| 2006 | Pereira et al, <sup>23</sup>      | *              | *                 | *                         | *                   | **            | *                     | *                   | *                     | 9           |
| 2006 | Pittas et al, <sup>24</sup>       | *              | *                 | *                         | *                   | **            | *                     | *                   | *                     | 9           |
| 2006 | Van et al, <sup>25</sup>          | *              | *                 | *                         | *                   | **            | *                     | *                   | *                     | 9           |
| 2007 | Schulze et al, <sup>26</sup>      | *              | *                 | *                         | *                   | **            | *                     | *                   | *                     | 9           |
| 2008 | Larsson et al, <sup>27</sup>      | *              | *                 | *                         | *                   | **            | *                     | *                   | *                     | 9           |
| 2008 | Weng et al, <sup>28</sup>         | *              | *                 | *                         | *                   | **            | *                     | *                   | *                     | 9           |
| 2009 | Kirii et al, <sup>29</sup>        | *              | *                 | *                         | *                   | **            | *                     | *                   | *                     | 9           |
| 2009 | Ohira et al, <sup>30</sup>        | *              | *                 | *                         | *                   | **            | *                     | *                   | *                     | 9           |
| 2009 | Villegas et al, <sup>31</sup>     | *              | *                 | *                         | *                   | **            | *                     | *                   | *                     | 9           |
| 2010 | Hopping et al, <sup>32</sup>      | *              | *                 | *                         | *                   | **            | *                     | *                   | *                     | 9           |
| 2010 | Kim et al, <sup>33</sup>          | *              | *                 | *                         | *                   | **            | *                     | *                   | *                     | 8           |
| 2010 | Kirii et al, <sup>34</sup>        | *              | *                 | *                         | *                   | **            | *                     | *                   | *                     | 9           |
| 2010 | Nanri et al, <sup>35</sup>        | *              | *                 | *                         | *                   | **            | *                     | *                   | *                     | 9           |
| 2011 | Larsson et al, <sup>36</sup>      | *              | *                 | *                         | *                   | **            | *                     | *                   | *                     | 9           |
| 2012 | Weng et al, <sup>37</sup>         | *              | *                 | *                         | *                   | **            | *                     | *                   |                       | 8           |
| 2012 | Zhang et al, <sup>38</sup>        | *              | *                 | *                         | *                   | **            | *                     | *                   | *                     | 9           |

|    |      |                                    |   |   |   |   |    |   |   |   |   |
|----|------|------------------------------------|---|---|---|---|----|---|---|---|---|
| 1  | 2013 | Hata et al, <sup>39</sup>          | * | * | * | * | ** | * | * | * | 9 |
| 2  | 2013 | Lin et al, <sup>40</sup>           | * | * | * | * | ** | * | * | * | 9 |
| 3  | 2013 | Oba et al, <sup>41</sup>           | * | * | * | * | ** | * | * | * | 9 |
| 4  | 2013 | Sluijs et al, <sup>42</sup>        | * | * | * | * | ** |   | * | * | 8 |
| 5  | 2014 | Hruby et al, <sup>43</sup>         | * | * | * | * | ** | * | * | * | 9 |
| 6  | 2014 | Sluijs et al, <sup>44</sup>        | * | * | * | * | ** | * | * | * | 9 |
| 7  | 2015 | Adebamowo et al, <sup>45</sup>     | * | * | * | * | ** | * | * | * | 9 |
| 8  | 2015 | Adebamowo et al (2), <sup>46</sup> | * | * | * | * | ** | * | * | * | 9 |
| 9  | 2015 | Bain et al, <sup>47</sup>          | * | * | * | * | ** | * | * | * | 9 |
| 10 | 2015 | Huang et al, <sup>48</sup>         | * | * | * |   | ** | * | * | * | 8 |
| 11 | 2017 | Hruby et al, <sup>49</sup>         | * | * | * | * | ** | * | * | * | 9 |
| 12 | 2017 | Kokubo et al, <sup>50</sup>        | * | * | * | * | ** | * | * | * | 9 |
| 13 | 2017 | Konishi et al, <sup>51</sup>       | * | * | * | * | *  | * | * | * | 9 |

For peer review only

1  
2  
3  
4  
5  
6  
7  
8  
9  
10  
11  
12  
13  
14  
15  
16  
17  
18  
19  
20  
21  
22  
23  
24  
25  
26  
27  
28  
29  
30  
31  
32  
33  
34  
35  
36  
37  
38  
39  
40  
41  
42  
43  
44  
45  
46  
47  
48  
49  
50  
51  
52  
53  
54  
55  
56  
57  
58  
59  
60

**A** funnel plot with pseudo 95% confidence limits

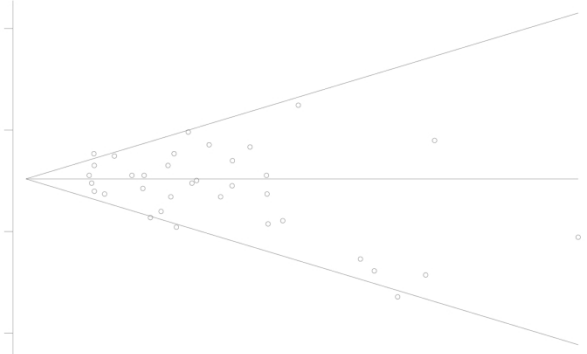

**B**

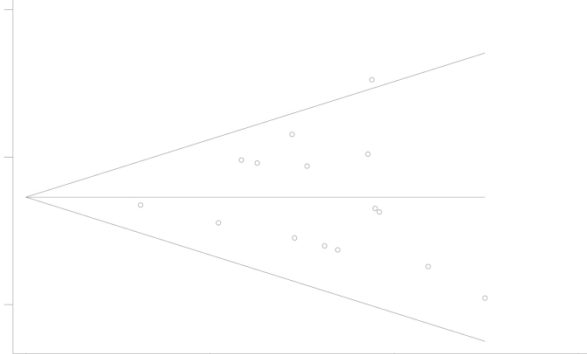

**C**

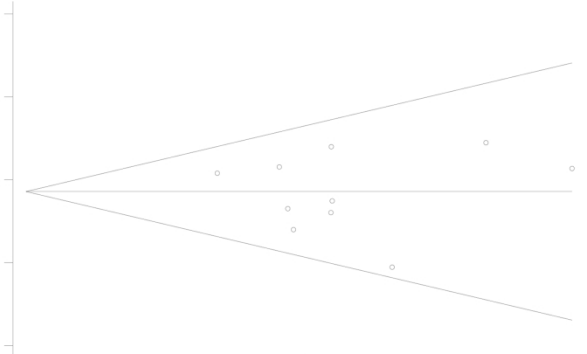

1  
2  
3  
4  
5  
6  
7  
8  
9  
10  
11  
12  
13  
14  
15  
16  
17  
18  
19  
20  
21  
22  
23  
24  
25  
26  
27  
28  
29  
30  
31  
32  
33  
34  
35  
36  
37  
38  
39  
40  
41  
42  
43  
44  
45  
46  
47  
48  
49  
50  
51  
52  
53  
54  
55  
56  
57  
58  
59  
60

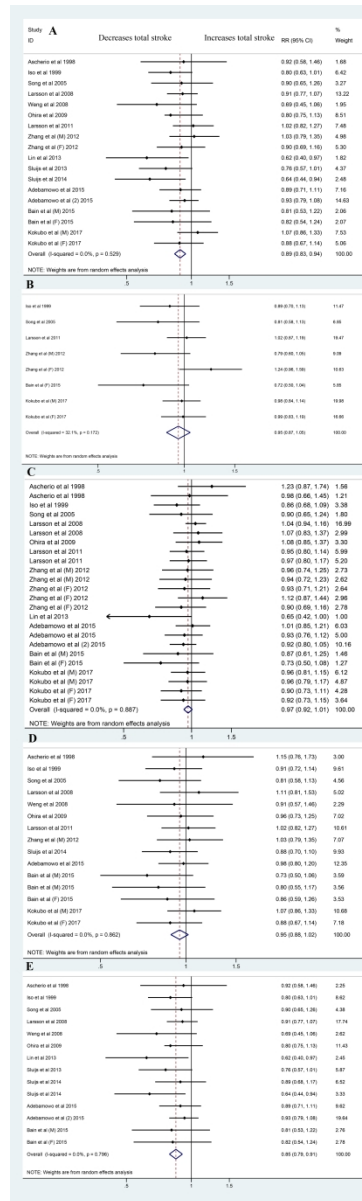

1  
2  
3  
4  
5  
6  
7  
8  
9  
10  
11  
12  
13  
14  
15  
16  
17  
18  
19  
20  
21  
22  
23  
24  
25  
26  
27  
28  
29  
30  
31  
32  
33  
34  
35  
36  
37  
38  
39  
40  
41  
42  
43  
44  
45  
46  
47  
48  
49  
50  
51  
52  
53  
54  
55  
56  
57  
58  
59  
60

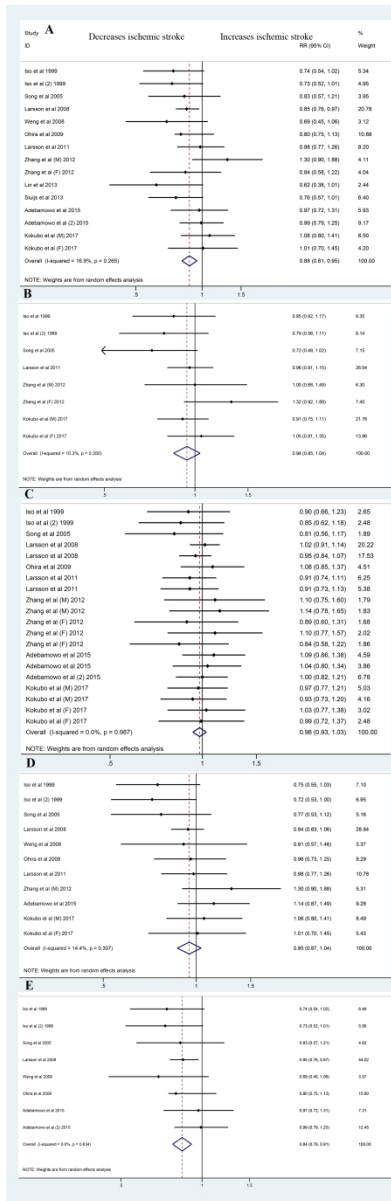



1  
2  
3  
4  
5  
6  
7  
8  
9  
10  
11  
12  
13  
14  
15  
16  
17  
18  
19  
20  
21  
22  
23  
24  
25  
26  
27  
28  
29  
30  
31  
32  
33  
34  
35  
36  
37  
38  
39  
40  
41  
42  
43  
44  
45  
46  
47  
48  
49  
50  
51  
52  
53  
54  
55  
56  
57  
58  
59  
60

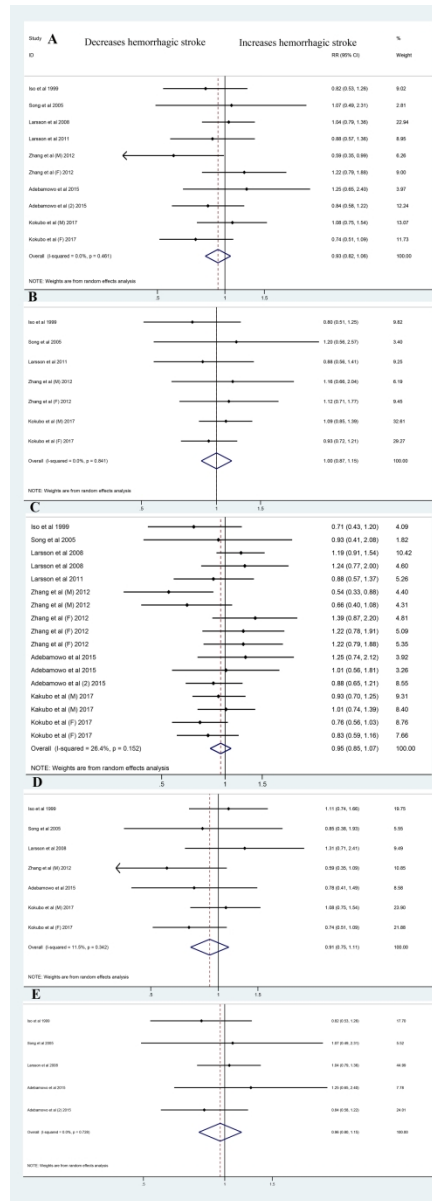

1  
2  
3  
4  
5  
6  
7  
8  
9  
10  
11  
12  
13  
14  
15  
16  
17  
18  
19  
20  
21  
22  
23  
24  
25  
26  
27  
28  
29  
30  
31  
32  
33  
34  
35  
36  
37  
38  
39  
40  
41  
42  
43  
44  
45  
46  
47  
48  
49  
50  
51  
52  
53  
54  
55  
56  
57  
58  
59  
60

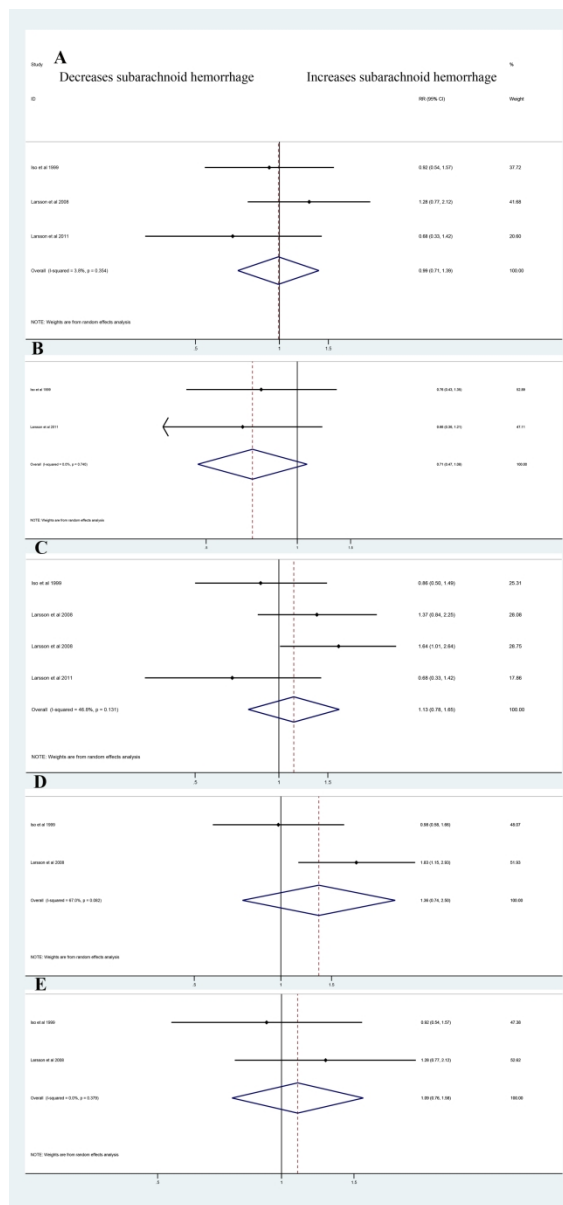

1  
2  
3  
4  
5  
6  
7  
8  
9  
10  
11  
12  
13  
14  
15  
16  
17  
18  
19  
20  
21  
22  
23  
24  
25  
26  
27  
28  
29  
30  
31  
32  
33  
34  
35  
36  
37  
38  
39  
40  
41  
42  
43  
44  
45  
46  
47  
48  
49  
50  
51  
52  
53  
54  
55  
56  
57  
58  
59  
60

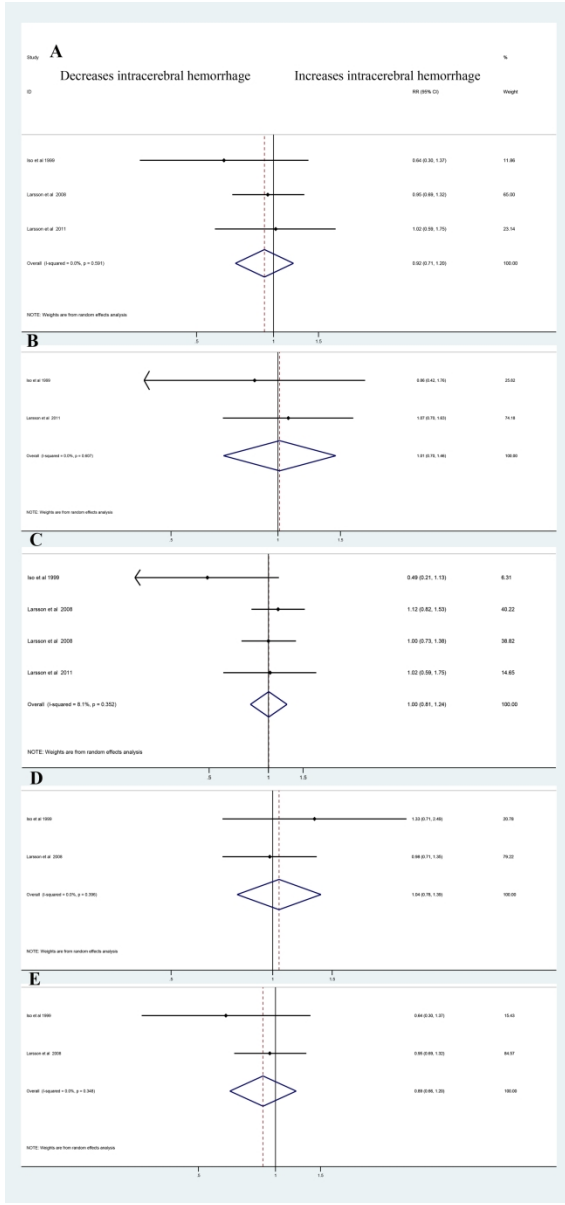

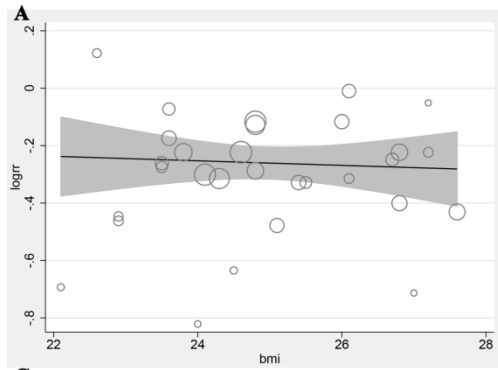

```

B
. tabulate sex, generate ( sexnew )

      sex | Freq.  Percent  Cum.
-----+-----
both male and female |    10     28.57   28.57
female              |    17     48.57   77.14
male                 |     8     22.86  100.00
-----+-----
Total                |    35    100.00

. metareg logrr sexnew1 sexnew2 sexnew3, wsize (selogrr) knapphartung reml
note: sexnew3 dropped because of collinearity

Meta-regression              Number of obs =    35
RMSE estimate of between-study variance      tau2 = .004692
% residual variation due to heterogeneity     I-squared_res = 36.58%
Proportion of between-study variance explained  Adj R-squared = -26.08%
Joint test for all covariates                 Model F(2,32) = 1.31
With Knapp-Hartung modification              Prob > F = 0.2841

      logrr | Coef.  Std. Err.  t  P>|t|  [95% Conf. Interval]
-----+-----
sexnew1    | -1.1314075  .0857798   -1.53  0.135  -1.3061323  -.0433174
sexnew2    | -0.630804   .0541113   -1.17  0.252  -1.733016  -.0471407
      _cons | -1.956565   .0461514   -4.24  0.000  -2.096637  -1.1016492
    
```

```

C
. tabulate participantregion, generate ( participantregionnew )

      participantregion | Freq.  Percent  Cum.
-----+-----
on                     |    35    100.00
Asia                   |    13     37.14   37.14
Multiple nations       |     5     14.29   51.43
North America         |    17     48.57   100.00
-----+-----
Total                  |    35    100.00

. metareg logrr participantregionnew1 participantregionnew2 participantregionnew3, wsize (selogrr) knapphartung reml
note: participantregionnew3 dropped because of collinearity

Meta-regression              Number of obs =    35
RMSE estimate of between-study variance      tau2 = .004698
% residual variation due to heterogeneity     I-squared_res = 35.22%
Proportion of between-study variance explained  Adj R-squared = -30.80%
Joint test for all covariates                 Model F(2,32) = 0.10
With Knapp-Hartung modification              Prob > F = 0.9047

      logrr | Coef.  Std. Err.  t  P>|t|  [95% Conf. Interval]
-----+-----
participantregionnew2 | .0027567  .0731865   0.04  0.970  -1.463193  .1518327
participantregionnew1 | -.001657  .0599158  -0.34  0.739  -1.422102  .1018788
      _cons         | -2.2392399  .0510872  -4.68  0.000  -2.3433012  -1.1351766
    
```

```

D
. tabulate dietaryassessment, generate ( dietaryassessmentnew )

      dietaryassessment | Freq.  Percent  Cum.
-----+-----
24h dietary recall and FFQ |     1     2.86   2.86
FFQ                        |     4    11.43  14.29
SPFQ                       |     1     2.86  17.14
validated DRQ              |     1     2.86  20.00
validated FFQ              |    17    48.57  68.57
validated SPFQ             |    11    31.43  100.00
-----+-----
Total                       |    35    100.00

. metareg logrr dietaryassessmentnew1 dietaryassessmentnew2 dietaryassessmentnew3 dietaryassessmentnew4 dietaryassessmentnew5 dietaryassessmentnew6 dietaryassessmentnew7 dietaryassessmentnew8 dietaryassessmentnew9 dietaryassessmentnew10 dietaryassessmentnew11 dietaryassessmentnew12 dietaryassessmentnew13 dietaryassessmentnew14 dietaryassessmentnew15 dietaryassessmentnew16 dietaryassessmentnew17 dietaryassessmentnew18 dietaryassessmentnew19 dietaryassessmentnew20 dietaryassessmentnew21 dietaryassessmentnew22 dietaryassessmentnew23 dietaryassessmentnew24 dietaryassessmentnew25 dietaryassessmentnew26 dietaryassessmentnew27 dietaryassessmentnew28 dietaryassessmentnew29 dietaryassessmentnew30 dietaryassessmentnew31 dietaryassessmentnew32 dietaryassessmentnew33 dietaryassessmentnew34 dietaryassessmentnew35 dietaryassessmentnew36 dietaryassessmentnew37 dietaryassessmentnew38 dietaryassessmentnew39 dietaryassessmentnew40 dietaryassessmentnew41 dietaryassessmentnew42 dietaryassessmentnew43 dietaryassessmentnew44 dietaryassessmentnew45 dietaryassessmentnew46 dietaryassessmentnew47 dietaryassessmentnew48 dietaryassessmentnew49 dietaryassessmentnew50 dietaryassessmentnew51 dietaryassessmentnew52 dietaryassessmentnew53 dietaryassessmentnew54 dietaryassessmentnew55 dietaryassessmentnew56 dietaryassessmentnew57 dietaryassessmentnew58 dietaryassessmentnew59 dietaryassessmentnew60 dietaryassessmentnew61 dietaryassessmentnew62 dietaryassessmentnew63 dietaryassessmentnew64 dietaryassessmentnew65 dietaryassessmentnew66 dietaryassessmentnew67 dietaryassessmentnew68 dietaryassessmentnew69 dietaryassessmentnew70 dietaryassessmentnew71 dietaryassessmentnew72 dietaryassessmentnew73 dietaryassessmentnew74 dietaryassessmentnew75 dietaryassessmentnew76 dietaryassessmentnew77 dietaryassessmentnew78 dietaryassessmentnew79 dietaryassessmentnew80 dietaryassessmentnew81 dietaryassessmentnew82 dietaryassessmentnew83 dietaryassessmentnew84 dietaryassessmentnew85 dietaryassessmentnew86 dietaryassessmentnew87 dietaryassessmentnew88 dietaryassessmentnew89 dietaryassessmentnew90 dietaryassessmentnew91 dietaryassessmentnew92 dietaryassessmentnew93 dietaryassessmentnew94 dietaryassessmentnew95 dietaryassessmentnew96 dietaryassessmentnew97 dietaryassessmentnew98 dietaryassessmentnew99 dietaryassessmentnew100, wsize (selogrr) knapphartung reml
note: dietaryassessmentnew2 through dietaryassessmentnew100 dropped because of collinearity

Meta-regression              Number of obs =    35
RMSE estimate of between-study variance      tau2 = .004258
% residual variation due to heterogeneity     I-squared_res = 38.44%
Proportion of between-study variance explained  Adj R-squared = -14.42%
Joint test for all covariates                 Model F(15,29) = 0.16
With Knapp-Hartung modification              Prob > F = 0.5210

      logrr | Coef.  Std. Err.  t  P>|t|  [95% Conf. Interval]
-----+-----
dietaryassessmentnew1 | .1072405  .5101822   0.20  0.841  -1.07096  1.1334551
dietaryassessmentnew2 | .0470373  .294068  1.58  0.124  -0.139403  1.073757
dietaryassessmentnew3 | -.1518405  .111752  -1.46  0.107  -1.152599  1.155949
dietaryassessmentnew4 | .1600754  .1811794   1.30  0.205  -0.1204983  .4805589
dietaryassessmentnew5 | .1948872  .1012421  1.92  0.171  -0.1057583  .4907228
dietaryassessmentnew6 | -.6388793  .279225  -2.27  0.031  -1.205958  -.067950
    
```



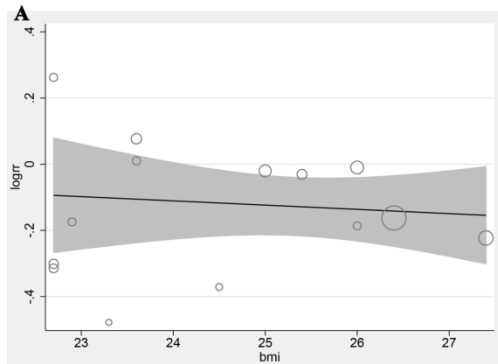

```

B tabulate sex, generate ( sexnew )

      sex | Freq.  Percent   Cum.
-----+-----
both male and female |      4    26.67    26.67
female              |      7    46.67    73.33
male                 |      4    26.67   100.00
-----+-----
Total                |     15   100.00

. metareg logrr sexnew1 sexnew2 sexnew3, wase (selogrr) knapphartung reml
note: sexnew3 dropped because of collinearity

Meta-regression              Number of obs =    15
REML estimate of between-study variance      tau2 = .004782
% residual variation due to heterogeneity     I-squared_res = 1.79%
Proportion of between-study variance explained  Adj R-squared = .%
Joint test for all covariates                 Model F(2,12) = 2.39
With Knapp-Hartung modification              Prob > F = 0.1339

      logrr | Coef.  Std. Err.   t   P>|t|   [95% Conf. Interval]
-----+-----
sexnew1    | -.2383161  .109578   -2.17  0.050  -0.4770662   .0004339
sexnew2    | -.0739192  .0940187  -0.79  0.447  -0.2787683   .1309299
   _cons   | -.0480002  .0681983  -0.70  0.495  -0.1965933   .1005894
    
```

```

C . tabulate participantregion, generate ( participantregionnew )

participantregion | Freq.  Percent   Cum.
-----+-----
Asia              |      4    40.00    40.00
Europe            |      3    30.00    70.00
North America    |      8    80.00   100.00
-----+-----
Total            |     15   100.00

. metareg logrr participantregionnew1 participantregionnew2, wase (selogrr) knapphartung reml
note: participantregionnew3 dropped because of collinearity

Meta-regression              Number of obs =    15
REML estimate of between-study variance      tau2 = .0014
% residual variation due to heterogeneity     I-squared_res = 21.74%
Proportion of between-study variance explained  Adj R-squared = .%
Joint test for all covariates                 Model F(2,12) = 0.56
With Knapp-Hartung modification              Prob > F = 0.5842

      logrr | Coef.  Std. Err.   t   P>|t|   [95% Conf. Interval]
-----+-----
participantregionnew1 | -.1089353  .1083661   1.01  0.335  -0.1271992   .1450197
participantregionnew2 | -.0117202  .0911749   0.13  0.900  -0.1849328   .1610732
   _cons             | -.1429514  .0453255  -3.16  0.008  -0.2052493  -.0806492
    
```

```

D . tabulate dietaryassessment, generate ( dietaryassessmentnew )

dietaryassessment | Freq.  Percent   Cum.
-----+-----
FFQ                |      6    40.00    40.00
validated FFQ      |      9    60.00   100.00
-----+-----
Total              |     15   100.00

. metareg logrr dietaryassessmentnew1 dietaryassessmentnew2, wase (selogrr) knapphartung reml
note: dietaryassessmentnew3 dropped because of collinearity

Meta-regression              Number of obs =    15
REML estimate of between-study variance      tau2 = .001922
% residual variation due to heterogeneity     I-squared_res = 21.79%
Proportion of between-study variance explained  Adj R-squared = .%
With Knapp-Hartung modification

      logrr | Coef.  Std. Err.   t   P>|t|   [95% Conf. Interval]
-----+-----
dietaryassessmentnew2 | .0410573  .0897444   0.46  0.655  -0.1508236   .2445382
   _cons              | -.1429338  .0753946  -1.89  0.099  -0.3258102  -.0000578
    
```

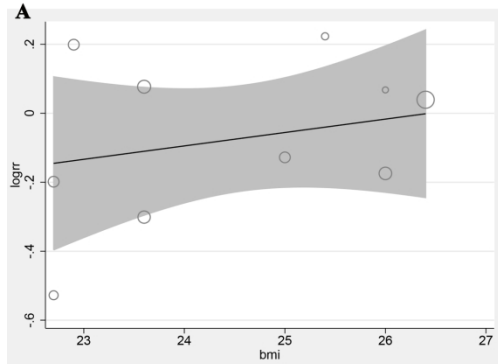

**C**

```
. tabulate participantregion, generate ( participantregionew )
```

| participantregion | freq. | Percent | Cum.   |
|-------------------|-------|---------|--------|
| Asia              | 4     | 40.00   | 40.00  |
| Europe            | 2     | 20.00   | 60.00  |
| North America     | 4     | 40.00   | 100.00 |
| Total             | 10    | 100.00  |        |

```
. metareg logrr participantregionew1 participantregionew2 participantregionew3, wsize (selogrr) knapphartung reml
note: participantregionew3 dropped because of collinearity
```

Meta-regression

|                                                |               |   |          |
|------------------------------------------------|---------------|---|----------|
| REML estimate of between-study variance        | tau2          | = | -.508835 |
| % residual variation due to heterogeneity      | I-squared_res | = | 15.78%   |
| Proportion of between-study variance explained | Adj R-squared | = | .%       |
| Joint test for all covariates                  | Model # (2,3) | = | 0.14     |
| With Knapp-Hartung modification                | Prob > F      | = | 0.8726   |

| logrr                | Coef.     | Std. Err. | t     | P> t  | [95% Conf. Interval] |
|----------------------|-----------|-----------|-------|-------|----------------------|
| participantregionew1 | -.010555  | .1797495  | -0.06 | 0.954 | -.4356955 .4143845   |
| participantregionew2 | .0796745  | .1944402  | 0.41  | 0.694 | -.3801034 .5394224   |
| _cons                | -.9943118 | .1371043  | -6.49 | 0.514 | -1.1951164 -.7935071 |

**B**

```
. tabulate sex, generate ( sexnew )
```

| sex    | Freq. | Percent | Cum.   |
|--------|-------|---------|--------|
| female | 6     | 60.00   | 60.00  |
| male   | 4     | 40.00   | 100.00 |
| Total  | 10    | 100.00  |        |

```
. metareg logrr sexnew1 sexnew2, wsize (selogrr) knapphartung reml
note: sexnew2 dropped because of collinearity
```

Meta-regression

|                                                |               |   |       |
|------------------------------------------------|---------------|---|-------|
| REML estimate of between-study variance        | tau2          | = | 0     |
| % residual variation due to heterogeneity      | I-squared_res | = | 0.42% |
| Proportion of between-study variance explained | Adj R-squared | = | .%    |
| With Knapp-Hartung modification                |               |   |       |

| logrr   | Coef.     | Std. Err. | t     | P> t  | [95% Conf. Interval] |
|---------|-----------|-----------|-------|-------|----------------------|
| sexnew1 | -.1120692 | .1333867  | -0.84 | 0.425 | -.4196595 .1955211   |
| _cons   | -.0110753 | .0978042  | -0.11 | 0.913 | -.2366123 .2144617   |

**D**

```
. tabulate dietaryassessment, generate ( dietaryassessmentnew )
```

| dietaryassessment | freq. | Percent | Cum.   |
|-------------------|-------|---------|--------|
| FFQ               | 4     | 40.00   | 40.00  |
| validated FFQ     | 6     | 60.00   | 100.00 |
| Total             | 10    | 100.00  |        |

```
. metareg logrr dietaryassessmentnew1 dietaryassessmentnew2, wsize (selogrr) knapphartung reml
note: dietaryassessmentnew2 dropped because of collinearity
```

Meta-regression

|                                                |               |   |         |
|------------------------------------------------|---------------|---|---------|
| REML estimate of between-study variance        | tau2          | = | .001097 |
| % residual variation due to heterogeneity      | I-squared_res | = | 6.09%   |
| Proportion of between-study variance explained | Adj R-squared | = | .%      |
| With Knapp-Hartung modification                |               |   |         |

| logrr                 | Coef.    | Std. Err. | t     | P> t  | [95% Conf. Interval] |
|-----------------------|----------|-----------|-------|-------|----------------------|
| dietaryassessmentnew1 | .0642559 | .1426454  | 0.45  | 0.644 | -.2044051 .3319134   |
| _cons                 | -.112665 | .1133825  | -0.99 | 0.349 | -.2741255 .1487955   |

1  
2  
3  
4  
5  
6  
7  
8  
9  
10  
11  
12  
13  
14  
15  
16  
17  
18  
19  
20  
21  
22  
23  
24  
25  
26  
27  
28  
29  
30  
31  
32  
33  
34  
35  
36  
37  
38  
39  
40  
41  
42  
43  
44  
45  
46  
47  
48  
49  
50  
51  
52  
53  
54  
55  
56  
57  
58  
59  
60

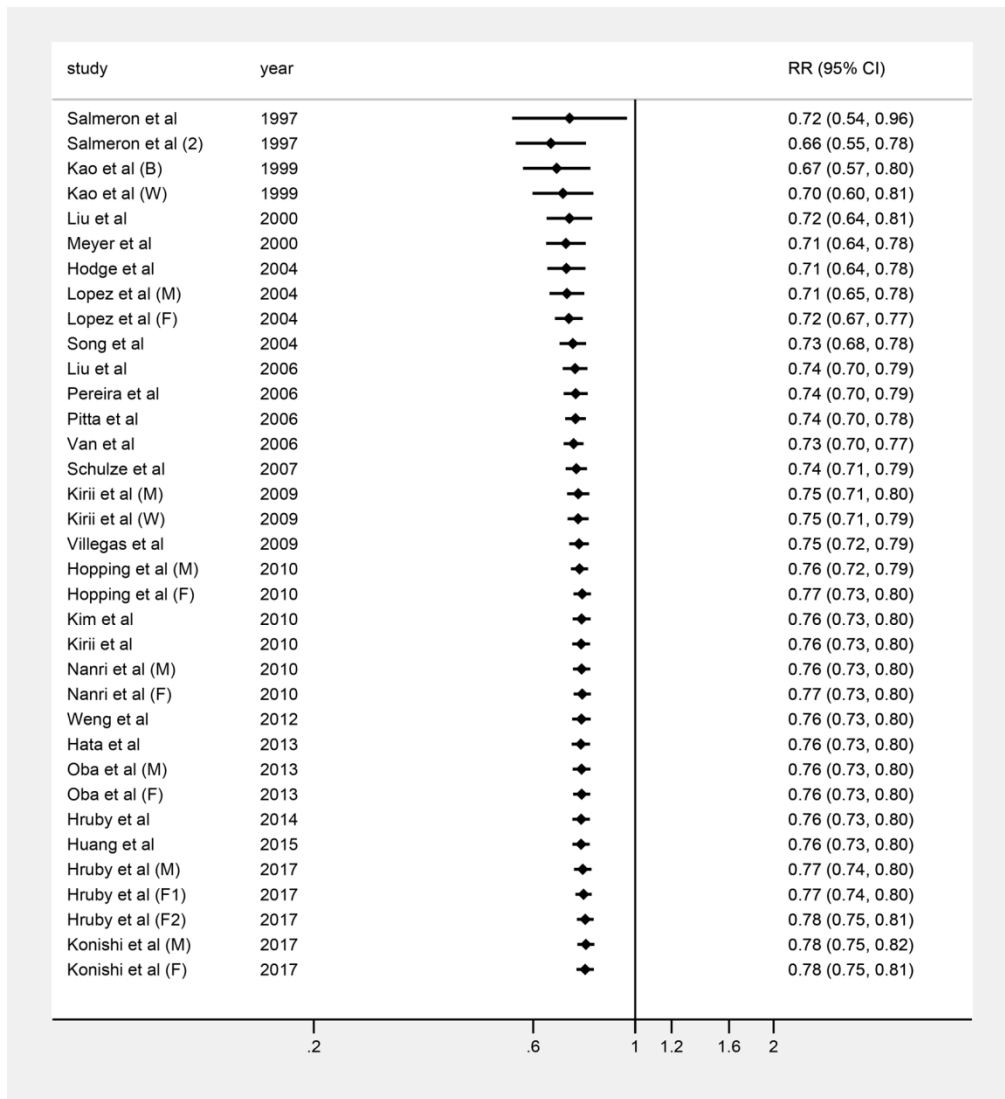



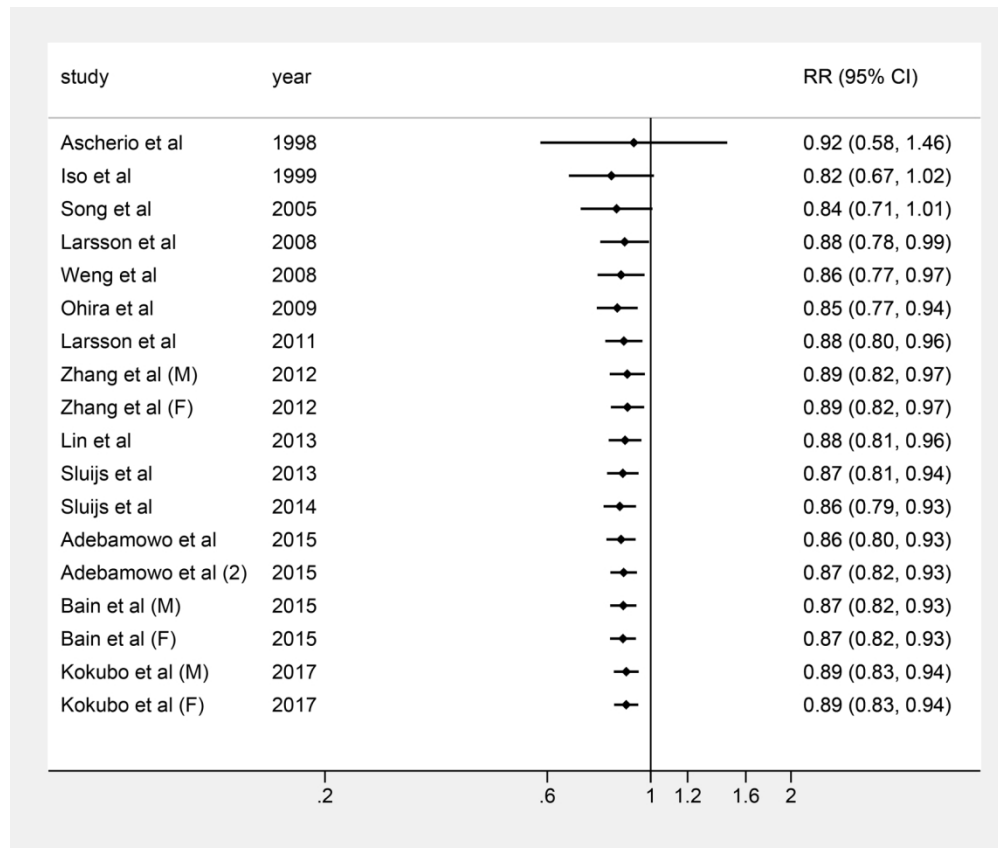

1  
2  
3  
4  
5  
6  
7  
8  
9  
10  
11  
12  
13  
14  
15  
16  
17  
18  
19  
20  
21  
22  
23  
24  
25  
26  
27  
28  
29  
30  
31  
32  
33  
34  
35  
36  
37  
38  
39  
40  
41  
42  
43  
44  
45  
46  
47  
48  
49  
50  
51  
52  
53  
54  
55  
56  
57  
58  
59  
60

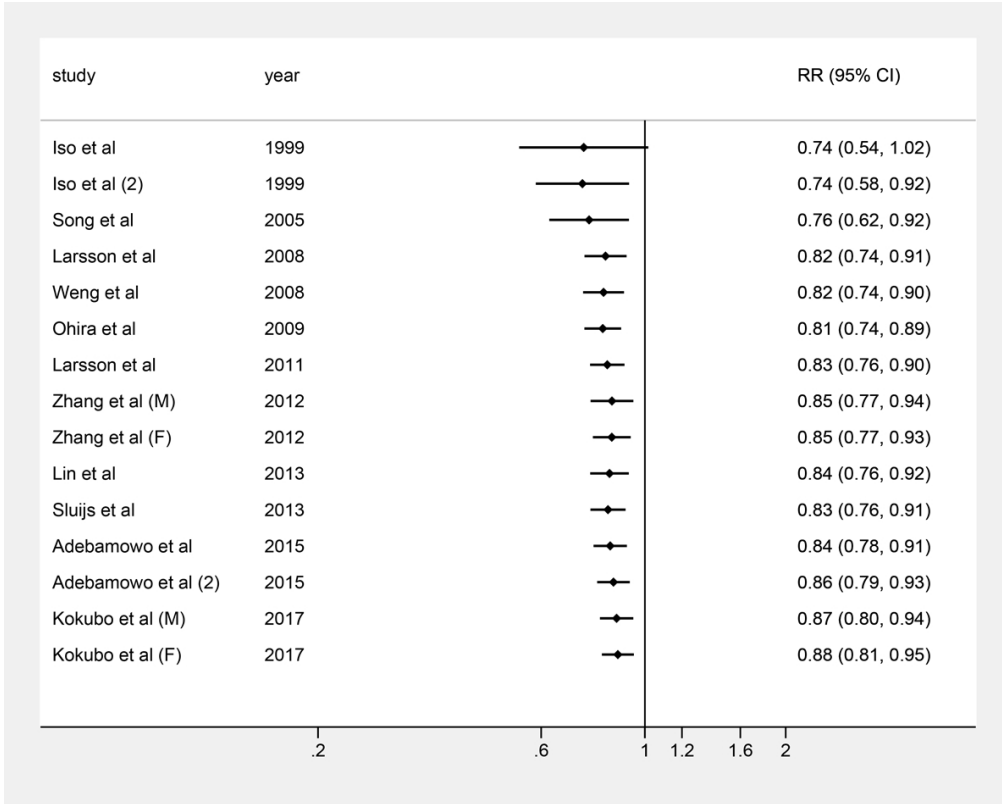

1  
2  
3  
4  
5  
6  
7  
8  
9  
10  
11  
12  
13  
14  
15  
16  
17  
18  
19  
20  
21  
22  
23  
24  
25  
26  
27  
28  
29  
30  
31  
32  
33  
34  
35  
36  
37  
38  
39  
40  
41  
42  
43  
44  
45  
46  
47  
48  
49  
50  
51  
52  
53  
54  
55  
56  
57  
58  
59  
60

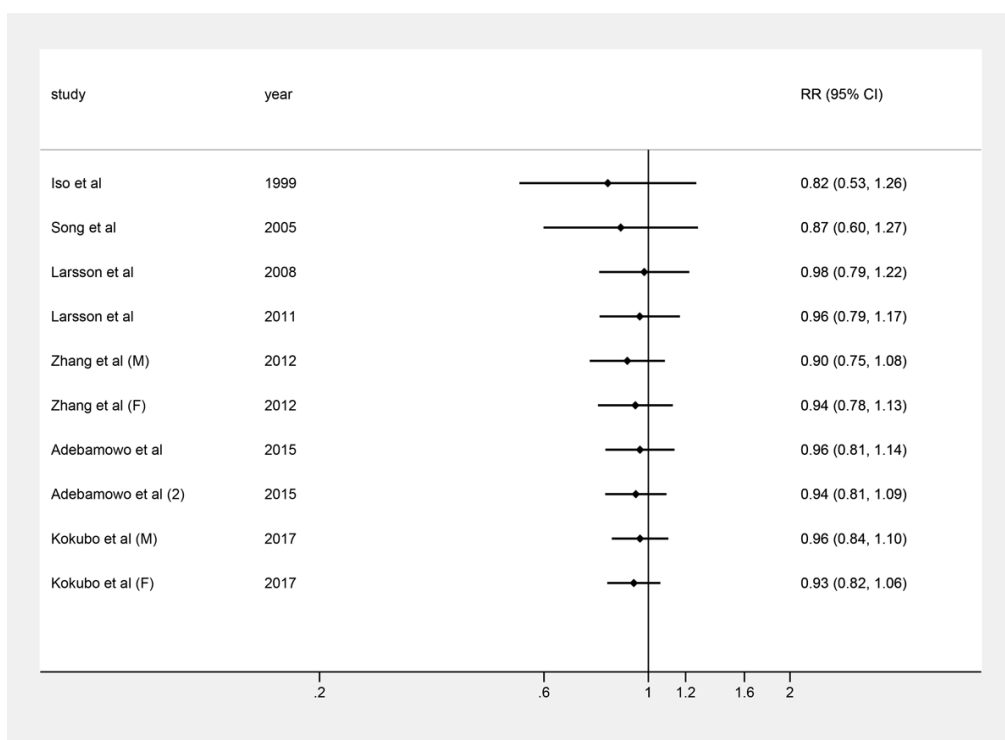

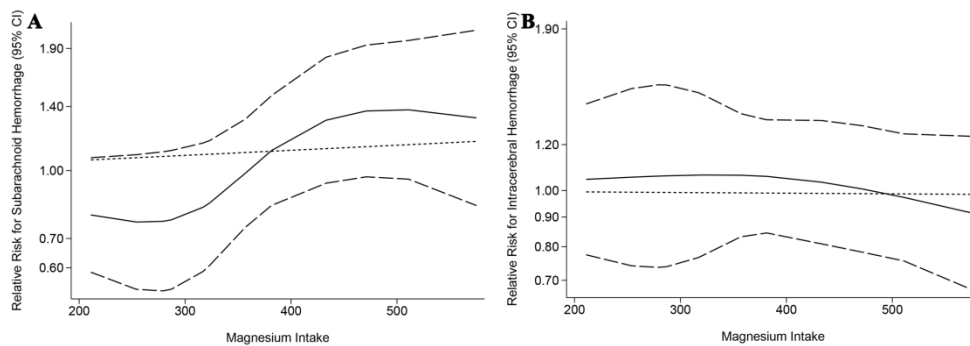

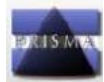

# Table S1 PRISMA 2009 Checklist

| Section/topic                      | #  | Checklist item                                                                                                                                                                                                                                                                                              | Reported on page # |
|------------------------------------|----|-------------------------------------------------------------------------------------------------------------------------------------------------------------------------------------------------------------------------------------------------------------------------------------------------------------|--------------------|
| <b>TITLE</b>                       |    |                                                                                                                                                                                                                                                                                                             | <b>1</b>           |
| Title                              | 1  | Identify the report as a systematic review, meta-analysis, or both.                                                                                                                                                                                                                                         | 1                  |
| <b>ABSTRACT</b>                    |    |                                                                                                                                                                                                                                                                                                             | <b>2-3</b>         |
| Structured summary                 | 2  | Provide a structured summary including, as applicable: background; objectives; data sources; study eligibility criteria, participants, and interventions; study appraisal and synthesis methods; results; limitations; conclusions and implications of key findings; systematic review registration number. | 2-3                |
| <b>INTRODUCTION</b>                |    |                                                                                                                                                                                                                                                                                                             | <b>4-5</b>         |
| Rationale                          | 3  | Describe the rationale for the review in the context of what is already known.                                                                                                                                                                                                                              | 4                  |
| Objectives                         | 4  | Provide an explicit statement of questions being addressed with reference to participants, interventions, comparisons, outcomes, and study design (PICOS).                                                                                                                                                  | 4-5                |
| <b>METHODS</b>                     |    |                                                                                                                                                                                                                                                                                                             | <b>5-9</b>         |
| Protocol and registration          | 5  | Indicate if a review protocol exists, if and where it can be accessed (e.g., Web address), and, if available, provide registration information including registration number.                                                                                                                               | 5                  |
| Eligibility criteria               | 6  | Specify study characteristics (e.g., PICOS, length of follow-up) and report characteristics (e.g., years considered, language, publication status) used as criteria for eligibility, giving rationale.                                                                                                      | 5-6                |
| Information sources                | 7  | Describe all information sources (e.g., databases with dates of coverage, contact with study authors to identify additional studies) in the search and date last searched.                                                                                                                                  | 5-6                |
| Search                             | 8  | Present full electronic search strategy for at least one database, including any limits used, such that it could be repeated.                                                                                                                                                                               | 5-6                |
| Study selection                    | 9  | State the process for selecting studies (i.e., screening, eligibility, included in systematic review, and, if applicable, included in the meta-analysis).                                                                                                                                                   | 5-6                |
| Data collection process            | 10 | Describe method of data extraction from reports (e.g., piloted forms, independently, in duplicate) and any processes for obtaining and confirming data from investigators.                                                                                                                                  | 6                  |
| Data items                         | 11 | List and define all variables for which data were sought (e.g., PICOS, funding sources) and any assumptions and simplifications made.                                                                                                                                                                       | 6                  |
| Risk of bias in individual studies | 12 | Describe methods used for assessing risk of bias of individual studies (including specification of whether this was done at the study or outcome level), and how this information is to be used in any data synthesis.                                                                                      | 6                  |
| Summary measures                   | 13 | State the principal summary measures (e.g., risk ratio, difference in means).                                                                                                                                                                                                                               | 6                  |
| Synthesis of results               | 14 | Describe the methods of handling data and combining results of studies, if done, including measures of consistency (e.g., $I^2$ ) for each meta-analysis.                                                                                                                                                   | 6-8                |



Table S1 PRISMA 2009 Checklist

| Section/topic                 | #  | Checklist item                                                                                                                                                                                           | Reported on page # |
|-------------------------------|----|----------------------------------------------------------------------------------------------------------------------------------------------------------------------------------------------------------|--------------------|
| Risk of bias across studies   | 15 | Specify any assessment of risk of bias that may affect the cumulative evidence (e.g., publication bias, selective reporting within studies).                                                             | 7                  |
| Additional analyses           | 16 | Describe methods of additional analyses (e.g., sensitivity or subgroup analyses, meta-regression), if done, indicating which were pre-specified.                                                         | 8-9                |
| <b>RESULTS</b>                |    |                                                                                                                                                                                                          | <b>9-16</b>        |
| Study selection               | 17 | Give numbers of studies screened, assessed for eligibility, and included in the review, with reasons for exclusions at each stage, ideally with a flow diagram.                                          | 9                  |
| Study characteristics         | 18 | For each study, present characteristics for which data were extracted (e.g., study size, PICOS, follow-up period) and provide the citations.                                                             | 9-10               |
| Risk of bias within studies   | 19 | Present data on risk of bias of each study and, if available, any outcome level assessment (see item 12).                                                                                                | 9-10               |
| Results of individual studies | 20 | For all outcomes considered (benefits or harms), present, for each study: (a) simple summary data for each intervention group (b) effect estimates and confidence intervals, ideally with a forest plot. | 10-16              |
| Synthesis of results          | 21 | Present results of each meta-analysis done, including confidence intervals and measures of consistency.                                                                                                  | 10-16              |
| Risk of bias across studies   | 22 | Present results of any assessment of risk of bias across studies (see Item 15).                                                                                                                          | 10-16              |
| Additional analysis           | 23 | Give results of additional analyses, if done (e.g., sensitivity or subgroup analyses, meta-regression [see Item 16]).                                                                                    | 10-16              |
| <b>DISCUSSION</b>             |    |                                                                                                                                                                                                          | <b>16-22</b>       |
| Summary of evidence           | 24 | Summarize the main findings including the strength of evidence for each main outcome; consider their relevance to key groups (e.g., healthcare providers, users, and policy makers).                     | 16-21              |
| Limitations                   | 25 | Discuss limitations at study and outcome level (e.g., risk of bias), and at review-level (e.g., incomplete retrieval of identified research, reporting bias).                                            | 21-22              |
| Conclusions                   | 26 | Provide a general interpretation of the results in the context of other evidence, and implications for future research.                                                                                  | 22                 |
| <b>FUNDING</b>                |    |                                                                                                                                                                                                          | <b>23</b>          |
| Funding                       | 27 | Describe sources of funding for the systematic review and other support (e.g., supply of data); role of funders for the systematic review.                                                               | 23                 |

From: Moher D, Liberati A, Tetzlaff J, Altman DG, The PRISMA Group (2009). Preferred Reporting Items for Systematic Reviews and Meta-Analyses: The PRISMA Statement. PLoS Med 6(7): e1000097. doi:10.1371/journal.pmed1000097

For more information, visit: [www.prisma-statement.org](http://www.prisma-statement.org).

## MOOSE Checklist for Meta-analyses of Observational Studies

| Item No                                     | Recommendation                                                                                                                                                                                               | Reported on Page No |
|---------------------------------------------|--------------------------------------------------------------------------------------------------------------------------------------------------------------------------------------------------------------|---------------------|
| Reporting of background should include      |                                                                                                                                                                                                              |                     |
| 1                                           | Problem definition                                                                                                                                                                                           | 4                   |
| 2                                           | Hypothesis statement                                                                                                                                                                                         | 4                   |
| 3                                           | Description of study outcome(s)                                                                                                                                                                              | 5                   |
| 4                                           | Type of exposure or intervention used                                                                                                                                                                        | 5                   |
| 5                                           | Type of study designs used                                                                                                                                                                                   | 5                   |
| 6                                           | Study population                                                                                                                                                                                             | 4-5                 |
| Reporting of search strategy should include |                                                                                                                                                                                                              |                     |
| 7                                           | Qualifications of searchers (eg, librarians and investigators)                                                                                                                                               | 6-7                 |
| 8                                           | Search strategy, including time period included in the synthesis and key words                                                                                                                               | 5-6                 |
| 9                                           | Effort to include all available studies, including contact with authors                                                                                                                                      | 5-6                 |
| 10                                          | Databases and registries searched                                                                                                                                                                            | 5-6                 |
| 11                                          | Search software used, name and version, including special features used (eg, explosion)                                                                                                                      | 5-6                 |
| 12                                          | Use of hand searching (eg, reference lists of obtained articles)                                                                                                                                             | 5-6                 |
| 13                                          | List of citations located and those excluded, including justification                                                                                                                                        | 6                   |
| 14                                          | Method of addressing articles published in languages other than English                                                                                                                                      | 6                   |
| 15                                          | Method of handling abstracts and unpublished studies                                                                                                                                                         | 6                   |
| 16                                          | Description of any contact with authors                                                                                                                                                                      | 6                   |
| Reporting of methods should include         |                                                                                                                                                                                                              |                     |
| 17                                          | Description of relevance or appropriateness of studies assembled for assessing the hypothesis to be tested                                                                                                   | 7-8                 |
| 18                                          | Rationale for the selection and coding of data (eg, sound clinical principles or convenience)                                                                                                                | 6-7                 |
| 19                                          | Documentation of how data were classified and coded (eg, multiple raters, blinding and interrater reliability)                                                                                               | 6-7                 |
| 20                                          | Assessment of confounding (eg, comparability of cases and controls in studies where appropriate)                                                                                                             | 7-9                 |
| 21                                          | Assessment of study quality, including blinding of quality assessors, stratification or regression on possible predictors of study results                                                                   | 7-9                 |
| 22                                          | Assessment of heterogeneity                                                                                                                                                                                  | 7-9                 |
| 23                                          | Description of statistical methods (eg, complete description of fixed or random effects models, justification of whether the chosen models account for predictors of study results, dose-response models, or | 7-9                 |

|                                     |                                                                     |                    |
|-------------------------------------|---------------------------------------------------------------------|--------------------|
|                                     | cumulative meta-analysis) in sufficient detail to be replicated     |                    |
| 24                                  | Provision of appropriate tables and graphics                        | 9                  |
| Reporting of results should include |                                                                     |                    |
| 25                                  | Graphic summarizing individual study estimates and overall estimate | 10-14              |
| 26                                  | Table giving descriptive information for each study included        | 10-11,<br>Table S4 |
| 27                                  | Results of sensitivity testing (eg, subgroup analysis)              | 14                 |
| 28                                  | Indication of statistical uncertainty of findings                   | 16                 |

| Item No                                 | Recommendation                                                                                                            | Reported on Page No |
|-----------------------------------------|---------------------------------------------------------------------------------------------------------------------------|---------------------|
| Reporting of discussion should include  |                                                                                                                           |                     |
| 29                                      | Quantitative assessment of bias (eg, publication bias)                                                                    | 11-14               |
| 30                                      | Justification for exclusion (eg, exclusion of non-English language citations)                                             | 10                  |
| 31                                      | Assessment of quality of included studies                                                                                 | 11, Table S5        |
| Reporting of conclusions should include |                                                                                                                           |                     |
| 32                                      | Consideration of alternative explanations for observed results                                                            | 16-22               |
| 33                                      | Generalization of the conclusions (ie, appropriate for the data presented and within the domain of the literature review) | 16, 23              |
| 34                                      | Guidelines for future research                                                                                            | 17-20, 22           |
| 35                                      | Disclosure of funding source                                                                                              | None                |



# BMJ Open

## The association of magnesium intake with type 2 diabetes and total stroke: an updated systematic review and meta-analysis

|                                 |                                                                                                                                                                                                                                                                                                                                                                                                                                                                                                                                                                                                                                                                                                                                                                                                                                                                                                                                                                                         |
|---------------------------------|-----------------------------------------------------------------------------------------------------------------------------------------------------------------------------------------------------------------------------------------------------------------------------------------------------------------------------------------------------------------------------------------------------------------------------------------------------------------------------------------------------------------------------------------------------------------------------------------------------------------------------------------------------------------------------------------------------------------------------------------------------------------------------------------------------------------------------------------------------------------------------------------------------------------------------------------------------------------------------------------|
| Journal:                        | <i>BMJ Open</i>                                                                                                                                                                                                                                                                                                                                                                                                                                                                                                                                                                                                                                                                                                                                                                                                                                                                                                                                                                         |
| Manuscript ID                   | bmjopen-2019-032240.R2                                                                                                                                                                                                                                                                                                                                                                                                                                                                                                                                                                                                                                                                                                                                                                                                                                                                                                                                                                  |
| Article Type:                   | Original research                                                                                                                                                                                                                                                                                                                                                                                                                                                                                                                                                                                                                                                                                                                                                                                                                                                                                                                                                                       |
| Date Submitted by the Author:   | 09-Feb-2020                                                                                                                                                                                                                                                                                                                                                                                                                                                                                                                                                                                                                                                                                                                                                                                                                                                                                                                                                                             |
| Complete List of Authors:       | Zhao, Binghao; The Second Affiliated Hospital of Nanchang University, Department of Cardio-Thoracic Surgery<br>Zeng, Lianli; The second affiliated hospital of Nanchang University, Department of Cardiovascular Medicine<br>Zhao, Jiani; The second affiliated hospital of Nanchang University, Department of Cardiovascular Medicine<br>Wu, Qian; The second affiliated hospital of Nanchang University, Department of Cardiovascular Medicine<br>Dong, Yifei; The second affiliated hospital of Nanchang University, Department of Cardiovascular Medicine<br>Zou, Fang; The second affiliated hospital of Nanchang University, Department of Endocrinology<br>Gan, Li; The second affiliated hospital of Nanchang University, Department of Neurology<br>Wei, Yiping; The Second Affiliated Hospital of Nanchang University, Department of Cardio-Thoracic Surgery<br>Zhang, Wenxiong; The Second Affiliated Hospital of Nanchang University, Department of Cardio-Thoracic Surgery |
| <b>Primary Subject Heading</b>: | Nutrition and metabolism                                                                                                                                                                                                                                                                                                                                                                                                                                                                                                                                                                                                                                                                                                                                                                                                                                                                                                                                                                |
| Secondary Subject Heading:      | Diabetes and endocrinology, Epidemiology, Evidence based practice, Neurology, Cardiovascular medicine                                                                                                                                                                                                                                                                                                                                                                                                                                                                                                                                                                                                                                                                                                                                                                                                                                                                                   |
| Keywords:                       | Magnesium Intake, Type 2 Diabetes, Stroke < NEUROLOGY, Meta-Analysis                                                                                                                                                                                                                                                                                                                                                                                                                                                                                                                                                                                                                                                                                                                                                                                                                                                                                                                    |
|                                 |                                                                                                                                                                                                                                                                                                                                                                                                                                                                                                                                                                                                                                                                                                                                                                                                                                                                                                                                                                                         |

SCHOLARONE™  
Manuscripts



I, the Submitting Author has the right to grant and does grant on behalf of all authors of the Work (as defined in the below author licence), an exclusive licence and/or a non-exclusive licence for contributions from authors who are: i) UK Crown employees; ii) where BMJ has agreed a CC-BY licence shall apply, and/or iii) in accordance with the terms applicable for US Federal Government officers or employees acting as part of their official duties; on a worldwide, perpetual, irrevocable, royalty-free basis to BMJ Publishing Group Ltd ("BMJ") its licensees and where the relevant Journal is co-owned by BMJ to the co-owners of the Journal, to publish the Work in this journal and any other BMJ products and to exploit all rights, as set out in our [licence](#).

The Submitting Author accepts and understands that any supply made under these terms is made by BMJ to the Submitting Author unless you are acting as an employee on behalf of your employer or a postgraduate student of an affiliated institution which is paying any applicable article publishing charge ("APC") for Open Access articles. Where the Submitting Author wishes to make the Work available on an Open Access basis (and intends to pay the relevant APC), the terms of reuse of such Open Access shall be governed by a Creative Commons licence – details of these licences and which [Creative Commons](#) licence will apply to this Work are set out in our licence referred to above.

Other than as permitted in any relevant BMJ Author's Self Archiving Policies, I confirm this Work has not been accepted for publication elsewhere, is not being considered for publication elsewhere and does not duplicate material already published. I confirm all authors consent to publication of this Work and authorise the granting of this licence.

1  
2  
3  
4 **1 The association of magnesium intake with type 2 diabetes and total stroke: an**  
5  
6 **2 updated systematic review and meta-analysis**  
7  
8

9 Binghao Zhao<sup>1,2</sup>; Lianli Zeng<sup>3,4</sup>; Jiani Zhao<sup>3,4</sup>; Qian Wu<sup>3,4</sup>; Yifei Dong<sup>3</sup>; Fang Zou<sup>5</sup>;  
10  
11 Li Gan<sup>6</sup>; Yiping Wei<sup>1</sup>; Wenxiong Zhang<sup>1</sup>.  
12  
13

14 **Affiliations**  
15

16 <sup>1</sup>Department of Cardio-Thoracic Surgery, The Second Affiliated Hospital of  
17  
18 Nanchang University, Nanchang, China, 330006.  
19

20 <sup>2</sup>Departments of Neurosurgery, Peking Union Medical College Hospital, Chinese  
21  
22 Academy of Medical Sciences and Peking Union Medical College, Beijing, China,  
23  
24  
25 100000.  
26

27 <sup>3</sup>Department of Cardiovascular Medicine, The Second Affiliated Hospital of  
28  
29 Nanchang University, Nanchang, China, 330006.  
30

31 <sup>4</sup>Jiangxi medical college, Nanchang University, 330006, Nanchang, China  
32  
33

34 <sup>5</sup>Department of Endocrinology, The Second Affiliated Hospital of Nanchang  
35  
36 University, Nanchang, China, 330006.  
37

38 <sup>6</sup>Department of Neurology, The Second Affiliated Hospital of Nanchang University,  
39  
40 China, 330006.  
41  
42

43  
44 **18 Corresponding Author:** Wenxiong Zhang, MD, Department of Cardio-Thoracic  
45  
46 Surgery, The Second Affiliated Hospital of Nanchang University, 1 Minde Road,  
47  
48 Nanchang, China, 330006; E-mail: [zwx123dr@126.com](mailto:zwx123dr@126.com); Phone: +8618720909414;  
49  
50  
51 Fax: 0791-86133161.  
52  
53

54 **22 Short running head:** Magnesium Intake Reduces Diabetes and Total Stroke.  
55

56  
57 **23 Word count:** 5071.  
58  
59  
60

1  
2  
3  
4 24 **Abstract**

5  
6 25 **Objective:** The detailed associations between type 2 diabetes (T2D) and total stroke  
7  
8  
9 26 and magnesium intake as well as the dose-response trend should be updated in a  
10  
11  
12 27 timely manner.

13  
14 28 **Design:** Systematic review and meta-analyses.

15  
16  
17 29 **Data sources:** PubMed, EMBASE, Cochrane Library, Web of Science and  
18  
19  
20 30 ClinicalTrials.gov were rigorously searched from inception to March 15, 2019.

21  
22 31 **Eligibility criteria:** Prospective cohort studies investigating these two diseases were  
23  
24  
25 32 included.

26  
27 33 **Data synthesis:** Relative risk (RR) and 95% confidence intervals (95% CI) in random  
28  
29  
30 34 effects models as well as absolute risk (AR) were pooled to calculate the risk of T2D  
31  
32  
33 35 and stroke. Methodological quality was assessed by the Newcastle-Ottawa Scale.

34  
35 36 **Results:** Forty-one studies involving 53 cohorts were included. The magnitude of the  
36  
37  
38 37 risk was significantly reduced by 22% for T2D (RR, 0.78 [95% CI, 0.75-0.81];  $P <$   
39  
40  
41 38 0.001; AR reduction, 0.120%), 11% for total stroke (RR, 0.89 [95% CI, 0.83-0.94];  
42  
43  
44 39  $P <$  0.001; AR reduction, 0.281%), and 12% for ischemic stroke (RR, 0.88 [95% CI,  
45  
46  
47 40 0.81-0.95];  $P =$  0.001; AR reduction, 0.246%) when comparing the highest  
48  
49  
50 41 magnesium intake to the lowest. The inverse association still existed when studies on  
51  
52  
53 42 T2D were adjusted for cereal fiber (RR, 0.79;  $P <$  0.001) and those on total stroke  
54  
55  
56 43 were adjusted for calcium (RR, 0.89;  $P =$  0.040). Subgroup analyses suggested that  
57  
58  
59 44 the risk for total and ischemic stroke was significantly decreased in females,  
60  
45 participants with  $\geq 25$  mg/m<sup>2</sup> body mass index, and those with  $\geq 12$  y follow-up; the

1  
2  
3  
4 46 reduced risk in Asians was not as notable as that in North American and European  
5  
6  
7 47 populations.  
8

9 48 **Conclusions:** Magnesium intake has significantly inverse associations with T2D and  
10  
11  
12 49 total stroke in a dose-dependent manner. Feasible magnesium-rich dietary patterns  
13  
14  
15 50 may be highly beneficial for specific populations and could be highlighted in the  
16  
17 51 primary T2D and total stroke prevention strategies disseminated to the public.  
18

19 52 PROSPERO registration number CRD42018092690  
20  
21

22 53  
23

#### 24 54 **Strengths and limitations of this study**

25  
26  
27 55 1. In this study, we performed an updated comprehensive quantitative analysis  
28  
29 56 focusing on the dietary effect of magnesium intake.

30  
31 57 2. The study identified an inverse association between magnesium intake and T2D  
32  
33 58 and stroke.

34  
35 59 3. A quite number of prospective cohort studies were employed to guarantee the  
36  
37 60 robust evidence.

38  
39 61 4. There was imperfect of not including randomized controlled trails to prove the  
40  
41 62 causality.

42  
43 63 5. Cases ascertainment are limited by FFQ or self-reports.  
44  
45

46 64  
47

48 65 **Keywords:** Magnesium Intake; Type 2 Diabetes; Stroke; Meta-Analysis.  
49  
50  
51  
52  
53  
54  
55  
56  
57  
58  
59  
60

## 66 **Introduction**

67 Diabetes is a global burden with an alarming increasing rate throughout the world<sup>1,2</sup>.

68 Stroke is an independent disorder and a typical macrovascular complication of type 2  
69 diabetes (T2D), and it is regarded as the second leading cause of death after ischemic  
70 heart disease<sup>3,4</sup>. These pandemic health problems necessitate better primary  
71 prevention strategies.

72 Magnesium, a common cellular ion, acts as a critical cofactor for hundreds of  
73 enzymes involved in glucose metabolism, protein production, and nucleic acid  
74 synthesis<sup>5,6</sup>. Low levels of magnesium have been associated with many chronic and  
75 inflammatory diseases, such as Alzheimer's disease, asthma, attention deficit  
76 hyperactivity disorder, insulin resistance, T2D, hypertension, cardiovascular disease  
77 (e.g., stroke), migraine headaches, osteoporosis and cancer<sup>1,5,7,8</sup>.

78 Notably, many adults in developed countries do not consume the recommended  
79 daily amount of magnesium-rich foods such as whole grains, nuts, and green leafy  
80 vegetables, and magnesium is less mentioned in dietary guidelines and in studies on  
81 T2D or stroke prevention<sup>9,10</sup>. Thus, we chose T2D and stroke as our outcome of  
82 interest (cardiovascular disease (CVD) was not evaluated because there is already a  
83 wealth of research relating to CVD, and the definitions of CVD vary greatly among  
84 studies, which would increase the heterogeneity in the pooled process and impair our  
85 interpretation of the final conclusions). Emerging studies<sup>11-51</sup> on this topic are limited,  
86 and the results remain mixed. For example, most studies have indicated that  
87 magnesium intake has an inverse association with T2D or total stroke incidence;

1  
2  
3  
4 88 however, several others have revealed that there is an inverse trend but not a  
5  
6  
7 89 significant association, which is possibly due to limitations related to small sample  
8  
9  
10 90 sizes and differences in the intervention duration, study design, and participant  
11  
12 91 characteristics. Moreover, consecutive meta-analyses<sup>52,53</sup> have used less rigorous  
13  
14 92 inclusion; the results were not comprehensive, and they did not completely address  
15  
16  
17 93 the influence of other confounders (i.e., body mass index (BMI), cereal fiber, calcium,  
18  
19  
20 94 potassium) on the relationship. Accordingly, we performed a meta-analysis to (1)  
21  
22 95 establish a comprehensive estimate and update the epidemiological evidence for  
23  
24  
25 96 clinical practice; (2) discuss the results of stroke subtype and the impact of several  
26  
27  
28 97 statistical and epidemiology confounders on the investigated association; and (3)  
29  
30 98 highlight the details of the dose-response pattern observed among the participants  
31  
32  
33 99 analyzed in the studies.  
34

100

## 101 **Methods**

102 This study was reported according to the Preferred Reporting Items for Systematic  
103 Reviews and Meta-Analyses (PRISMA) guidelines (**Table S1**) and the Meta-analysis  
104 of Observational Studies in Epidemiology (MOOSE) Guidelines Checklist (**Table S2**)  
105 (Registration information: PROSPERO CRD42018092690).  
106

107

## 107 **Search Strategy**

108 PubMed, EMBASE, Cochrane Library, Web of Science and ClinicalTrials.gov were  
109 systematically reviewed through inception to March 15, 2019, for studies on  
110

1  
2  
3  
4 110 magnesium intake and T2D or stroke without language restrictions. The following key  
5  
6 111 words were used: “Magnesium”, “Type 2 Diabetes Mellitus”, “Type 2 Diabetes”,  
7  
8  
9 112 “Stroke”, “Cerebrovascular Stroke”, “Cohort Studies”, and “Prospective Studies”. We  
10  
11  
12 113 also manually searched the reference lists of the retrieved literature (including  
13  
14 114 meta-analyses and brief reports), bibliographies and gray literature (including  
15  
16  
17 115 presentations and unpublished literature) for further eligible articles. The search  
18  
19  
20 116 strategy can be found in **Table S3**.

21  
22 117

### 23 24 25 118 **Selection Criteria**

26  
27 119 (1) Eligible populations must be composed of individuals with plausible  
28  
29  
30 120 dietary/energy intake who had no history of diabetes and/or insulin treatment for T2D  
31  
32  
33 121 analysis and no current stroke for stroke analysis. (2) Their apparent life expectancy  
34  
35  
36 122 was long enough for proper follow-up. (3) We included only prospective cohort  
37  
38  
39 123 studies that reported magnesium intake and T2D and/or various types of stroke. (4)  
40  
41  
42 124 The follow-up duration of eligible studies was at least one year if they provided  
43  
44  
45 125 follow-up data. Notably, magnesium intake consisted of both dietary magnesium  
46  
47  
48 126 intake and total magnesium intake (dietary and supplementary magnesium).

49  
50  
51 127 Only studies containing the most comprehensive information on the population  
52  
53  
54 128 or endpoints were included to avoid duplication. We excluded reviews, basic science  
55  
56  
57 129 studies, meta-analyses, studies on gestational diabetes mellitus (GDM) and studies  
58  
59  
60 130 that focused only on magnesium supplementation.

131



## 132 **Data Extraction and Quality Assessments**

133 Two researchers independently extracted the following information: the first author,  
134 publication year, period of cohort studies, duration of persistent exposure, basic  
135 characteristics of the enrolled participants (weight, age, region, BMI, drinking and  
136 smoking habits (previous plus current), etc.), median magnesium intake for each  
137 quantile (tertile, quartile, or quintile), diabetes and total stroke cases, subtypes of total  
138 stroke, dietary and case assessments, adjusted confounding covariates. Importantly,  
139 total stroke is classified as clinical ischemic stroke (87%), hemorrhagic stroke (13%)  
140 and undetermined stroke<sup>54</sup>. Hemorrhagic stroke is classified as subarachnoid  
141 hemorrhage and intracerebral hemorrhage according to anatomical site or presumed  
142 etiology<sup>55</sup>. In cases of continuing disagreement, a final decision was reached after  
143 discussion with a third member of the panel.

144 Methodological quality was described by the Newcastle-Ottawa Scale (NOS),  
145 which was validated for assessment of the quality of nonrandomized controlled trials  
146 in meta-analyses<sup>56</sup>. For the 0-10 scale, each study was categorized as low (0-5),  
147 medium (6-7), or high (8-10) quality.

## 149 **Statistical Analysis**

150 Articles providing data separately for men and women or black and white or different  
151 types of disease within an article were treated as independent studies. Multivariate  
152 relative risk (RR) and corresponding 95% confidence intervals (CI) as well as  
153 absolute risk (AR) for measuring the quantitative associations between exposure and

1  
2  
3  
4 154 T2D, total stroke and other wanted outcomes, particularly for the highest vs. the  
5  
6  
7 155 lowest categories of magnesium intake, were estimated by the DerSimonian-Laird  
8  
9 156 random effects model because the assumptions involved account for the presence of  
10  
11 157 within-study and between-study variability. Statistical heterogeneity was determined  
12  
13  
14 158 with the Cochran Q chi-square test and the  $I^2$ . An  $I^2 > 50\%$  or a  $P$ -value for the Q test  
15  
16  
17 159  $< 0.1$  was considered to indicate significant heterogeneity<sup>57</sup>. We performed sensitivity  
18  
19  
20 160 analyses to test the robustness and post-subgroup analyses to detect the source of  
21  
22 161 heterogeneity. In addition, a random effects meta-regression analysis on BMI, sex,  
23  
24  
25 162 participant region, and dietary assessments with RR for each trial was performed to  
26  
27 163 obtain an understanding of the reasons for heterogeneity. RR and 95% CI might begin  
28  
29  
30 164 to significantly change as publication years increased in T2D and total stroke, etc.,  
31  
32  
33 165 which would be validated by cumulative meta-analyses.

34  
35 166 The dose-response analyses for all outcomes were proposed by Greenland and  
36  
37  
38 167 Longnecker<sup>58</sup> and Orsini<sup>59</sup> et al. The categories of magnesium intake, distributions of  
39  
40  
41 168 cases and person-year, RR and 95 CI were extracted. If the number of cases and/or  
42  
43  
44 169 person-years was not available, variance-weighted least squares regression was used  
45  
46  
47 170 to pool the risk estimate. For most studies, the median intake for each quantile (tertile,  
48  
49  
50 171 quartile or quintile) of magnesium intake was assigned as the representative dose. For  
51  
52  
53 172 continuous intake, which was reported as categorical data (range) in some studies, we  
54  
55  
56 173 assigned the midpoint category of the lower and upper bounds to the RR in these  
57  
58  
59 174 studies; when the highest category was open ended, we assumed the length of the  
60  
175 open-ended interval to be 1.5 times the adjacent interval; when the lowest category

1  
2  
3  
4 176 was open, we assigned the adjacent interval of the category to be 1.5 times the length  
5  
6 177 of the open-ended interval. We employed generalized least squares regression models  
7  
8  
9 178 to calculate study-specific RR estimates per 50 mg/day, 100 mg/day, and 150 mg/day  
10  
11  
12 179 magnesium intake increment if there was evidence of a linear relationship. Nonlinear  
13  
14 180 relationships between magnesium intake and all outcomes were evaluated using  
15  
16  
17 181 restricted cubic splines with four knots located at the 5<sup>th</sup>, 35<sup>th</sup>, 65<sup>th</sup>, and 95<sup>th</sup>  
18  
19 182 percentiles of the distribution. The *P*-value for curve linearity or nonlinearity was  
20  
21  
22 183 calculated by testing the null hypothesis that the coefficient of the second spline is  
23  
24  
25 184 equal to zero. All results were presented using two-stage dose-response model plots  
26  
27  
28 185 (including linear and nonlinear relationships). Some results were demonstrated as  
29  
30 186 forest plots for intake increments of < 50 mg/day, ≥ 50 and < 100 mg/day, ≥ 100 and  
31  
32 187 < 150 mg/day, and ≥ 150 mg/day.

34  
35 188 Publication bias was assessed graphically by Begg's adjusted rank correlation  
36  
37 189 funnel plots<sup>60</sup> and Egger's linear regression tests<sup>61</sup>. All analyses were performed using  
38  
39  
40 190 Stata version 14.0 (StataCorp, College Station, TX, USA); two-sided *P* < 0.05 was  
41  
42  
43 191 considered statistically significant except where otherwise specified.

44  
45  
46 192

### 47 48 193 **Patient and Public Involvement**

49  
50 194 No patients were involved in developing the research question or the outcome  
51  
52  
53 195 measures, and no patients were involved in planning the design or implementation of  
54  
55  
56 196 the study. Furthermore, no patients were asked to advise on the interpretation or  
57  
58  
59 197 writeup of the results. Since this study used aggregated data from previous  
60

1  
2  
3  
4 198 publications, it is not easy to disseminate the results of the research to study  
5  
6 199 participants directly.  
7  
8

9 200

## 11 201 **Results**

### 14 202 **Study Characteristics and Quality Assessment**

17 203 Of the 8713 studies, 107 studies were considered for eligibility after screening the  
18  
19 204 titles and abstracts (**Figure 1**). A total of 41<sup>11-51</sup> prospective cohort studies comprising  
20  
21  
22 205 53 cohorts, 1 912 634 participants and 76 678 cases were eligible for inclusion in the  
23  
24 206 systematic review and meta-analysis (**Table S4**). Hodge et al<sup>18</sup> recorded only 500  
25  
26 207 mg/day increments of magnesium for further pooled analyses; 2 studies<sup>33,51</sup> failed to  
27  
28 208 clearly distinguish the diabetes type, but the vast majority of cases had T2D. We  
29  
30  
31 209 computed the subtype data in three studies<sup>14,27,36</sup> after the extraction of total stroke,  
32  
33  
34 210 and we regarded ischemic stroke in three other studies<sup>28,30,42</sup> as total stroke given that  
35  
36  
37 211 ischemic stroke accounted for nearly 87% of total stroke. Participants were  
38  
39 212 predominately middle-aged at baseline, with a mean magnesium intake of 370 mg/day  
40  
41  
42 213 for the highest category and 232 mg/day for the lowest category. The mean duration  
43  
44 214 of all eligible studies was 10.7 years. Nineteen studies were conducted in North  
45  
46  
47 215 America (America); 5 studies were conducted in Europe (Sweden, the Netherlands  
48  
49 216 and Britain); 13 studies were conducted in Asia (China and Japan and Taipei); and 4  
50  
51  
52 217 studies enrolled individuals in multiple nations. Most of the included studies used  
53  
54 218 food frequency questionnaires (FFQs) or semiquantitative FFQs (SFFQs) to assess  
55  
56  
57 219 individual dietary intake. Eighteen studies used dietary magnesium intake, and 21  
58  
59  
60

1  
2  
3  
4 220 studies recorded total magnesium intake (dietary and supplementary magnesium  
5  
6  
7 221 intake). Of note, supplementary magnesium intake was assessed by the use of  
8  
9  
10 222 magnesium or multivitamin supplements; nevertheless, dietary magnesium accounted  
11  
12 223 for the majority of magnesium intake. Adjusted confounders were mostly similar;  
13  
14 224 however, adjusted dietary confounders such as cereal fiber, potassium, and calcium  
15  
16  
17 225 still varied across individual studies. It was unclear whether the included studies had  
18  
19  
20 226 adjusted for sodium because they did not provide this information. All the studies  
21  
22 227 were written in English.

23  
24  
25 228 After the quality assessments of the studies according to NOS, the average score  
26  
27 229 was 8.85 (**Table S5**), and all studies were of high quality (NOS score 8-10).

28  
29  
30 230

### 31 32 231 **Magnesium Intake and T2D Incidence**

33  
34  
35 232 Thirty-five cohorts from 26 publications<sup>11,12,15,20,22-26,29,31-35,37,39,41,43,48,49,51</sup> (1 219 636  
36  
37  
38 233 participants and 56 540 T2D cases) reported that the magnitude of T2D risk was  
39  
40  
41 234 reduced by 22% (RR, 0.78 [95% CI, 0.75-0.81];  $P < 0.001$ ; AR reduction, 0.120%),  
42  
43 235 comparing the highest category of magnesium intake to the lowest, with little  
44  
45  
46 236 evidence of heterogeneity ( $I^2 = 35.6\%$ ;  $P = 0.021$ ). The dose category-specific  
47  
48  
49 237 analysis suggested that for the  $< 50$  mg/day magnesium increment, the risk of T2D  
50  
51  
52 238 was reduced by 10% (RR, 0.90 [95% CI, 0.88-0.93];  $P < 0.001$ ); for the  $\geq 50$  and  $<$   
53  
54  
55 239 100 mg/day increments, the risk was decreased by 16% (RR, 0.84 [95% CI,  
56  
57  
58 240 0.82-0.87];  $P < 0.001$ ); for  $\geq 100$  and  $< 150$  mg/day increments, the risk was reduced  
59  
60 241 by 22% (RR, 0.78 [95% CI, 0.74-0.83];  $P < 0.001$ ); and for the  $\geq 150$  mg/day

1  
2  
3  
4 242 increment, the risk was reduced by 21% (RR, 0.79 [95% CI, 0.74-0.84];  $P < 0.001$ )  
5  
6 243 (**Figure 2**). Little evidence of publication bias was found (Egger's test:  $P = 0.088$ )  
7  
8  
9 244 (**Figure S1A**).  
10

11  
12 245

## 14 246 **Magnesium Intake and Stroke Incidence**

16  
17 247 Eighteen cohorts from 15 publications<sup>13,14,21,27,28,30,36,38,40,42,44-47,50</sup> (692 998  
18  
19 248 participants and 20 138 total stroke cases) reported that the magnitude of the risk of  
20  
21  
22 249 total stroke was decreased by 11% (RR, 0.89 [95% CI, 0.83-0.94];  $P < 0.001$ ; AR  
23  
24 250 reduction, 0.281%), comparing the highest category of magnesium intake with the  
25  
26  
27 251 lowest, with no heterogeneity ( $I^2 = 0\%$ ;  $P = 0.529$ ). The dose category-specific  
28  
29  
30 252 analysis revealed no significant association with the  $< 50$  mg/day,  $\geq 50$  and  $< 100$   
31  
32 253 mg/day increments or the  $\geq 100$  and  $< 150$  mg/day increments. For the  $\geq 150$  mg/day  
33  
34  
35 254 increment, the risk of total stroke was decreased by 15% (RR, 0.85 [95% CI,  
36  
37 255 0.79-0.91];  $P < 0.001$ ) (**Figure S2**). Publication bias was evaluated for stroke  
38  
39  
40 256 subtypes.

41  
42  
43 257 Fifteen cohorts from 12 publications<sup>14,21,27,28,30,36,38,40,42,45,46,50</sup> reported ischemic  
44  
45 258 stroke. The magnitude of the risk of ischemic stroke was reduced by 12% (RR, 0.88  
46  
47  
48 259 [95% CI, 0.81-0.95];  $P = 0.001$ ; AR reduction, 0.246%) with no significant  
49  
50  
51 260 heterogeneity ( $I^2 = 16.9\%$ ;  $P = 0.265$ ). The dose category-specific analysis identified  
52  
53  
54 261 no significant association with the  $< 50$  mg/day,  $\geq 50$  and  $< 100$  mg/day, or  $\geq 100$  and  
55  
56 262  $< 150$  mg/day increments. A decreasing trend existed but remained nonsignificant.  
57  
58  
59 263 The original risk was reduced by 16% in the analysis of the  $\geq 150$  mg/day increment  
60

1  
2  
3  
4 264 (RR, 0.84 [95% CI, 0.78-0.91];  $P < 0.001$ ) (**Figure S3**). No publication bias was  
5  
6  
7 265 observed in terms of ischemic stroke (Egger's test:  $P = 0.937$ ) (**Figure S1B**).

8  
9 266 Ten cohorts from 8 studies<sup>14,21,27,36,38,45,46,50</sup> reported that hemorrhagic stroke was  
10  
11  
12 267 not significantly associated with magnesium intake (RR, 0.93 [95% CI, 0.82-1.06];  $P$   
13  
14 268 = 0.282). The dose category-specific analysis identified no significant association  
15  
16  
17 269 (**Figure S4**). No significant heterogeneity or publication bias was observed in terms of  
18  
19  
20 270 hemorrhagic stroke (Egger's test:  $P = 0.809$ ) (**Figure S1C**).

21  
22 271 Three publications involving 3 cohorts<sup>14,27,36</sup> showed that high magnesium intake  
23  
24  
25 272 had no significant effect on reducing the risk of subarachnoid hemorrhage (RR, 0.99  
26  
27 273 [95% CI, 0.71-1.39];  $P = 0.963$ ). The dose category-specific analysis revealed no  
28  
29  
30 274 significant association (**Figure S5**).

31  
32 275 With respect to intracerebral hemorrhage, the pooled results from 3 cohorts<sup>14,27,36</sup>  
33  
34  
35 276 in 3 publications revealed no significant advantages of intracerebral hemorrhage (RR,  
36  
37 277 0.92 [95% CI, 0.71-1.20];  $P = 0.540$ ). The dose category-specific analysis revealed no  
38  
39  
40 278 significant association (**Figure S6**).

#### 41 42 43 44 45 280 **Meta-Regression and Cumulative Meta-Analysis**

46  
47  
48 281 According to the meta-regression results, there was no evidence of BMI, sex,  
49  
50  
51 282 participant region or dietary assessment for each individual trial bias in terms of T2D  
52  
53 283 (**Figure S7**), total stroke (**Figure S8**), ischemic stroke (**Figure S9**) and hemorrhagic  
54  
55  
56 284 stroke events (**Figure S10**). The male subgroup ( $P = 0.041$ ) in the sex category might  
57  
58  
59 285 lead to slight heterogeneity in terms of total stroke; however, sex ( $P = 0.112$ ) showed  
60

1  
2  
3  
4 286 no association with total stroke incidence.  
5

6 287 Analyses of T2D (**Figure S11**), total stroke (**Figure S12**) and ischemic stroke  
7  
8  
9 288 demonstrated that the RRs of the final results became robust within a narrow range  
10  
11  
12 289 and remained significant as publication years increased and more recent high-quality  
13  
14  
15 290 studies were included. After inclusion of the Iso et al<sup>14</sup> study, the RR and 95% CI for  
16  
17 291 ischemic stroke decreased to less than 1 and then became stable (**Figure S13**).  
18  
19  
20 292 Although there was no significant reduction in the risk of hemorrhagic stroke, the  
21  
22 293 evidence clearly showed that the confidence interval was becoming narrow, which  
23  
24  
25 294 trended toward significance (**Figure S14**). Thus, the risk for hemorrhagic stroke might  
26  
27 295 be reduced; additional studies are warranted.  
28  
29

30  
31  
32

### 33 297 **Sensitivity Analysis**

34  
35 298 When three<sup>24-26</sup> studies were excluded from the T2D analysis, the summary RR  
36  
37  
38 299 changed from 0.78 ([95% CI, 0.75-0.81]) to 0.78 ([95% CI, 0.75-0.82]), with the  
39  
40  
41 300 heterogeneity declining from ( $I^2 = 35.6\%$ ;  $P = 0.021$ ) to ( $I^2 = 24.0\%$ ;  $P = 0.112$ ).  
42  
43 301 Among T2D analyses, eight studies<sup>19,22,23,26,33,39,48,49</sup> adjusted for cereal fiber intake  
44  
45 302 yielded an RR of 0.79 ([95% CI, 0.73-0.85];  $P < 0.001$ ), and two studies<sup>15,35</sup> adjusted  
46  
47  
48 303 for calcium yielded an RR of 0.87 ([95% CI, 0.73-1.04];  $P = 0.128$ ). Among the total  
49  
50  
51 304 stroke analysis, the summary RR was 0.92 ([95% CI, 0.82-1.02];  $P = 0.097$ ) in five  
52  
53  
54 305 studies<sup>13,44-46,50</sup> adjusted for potassium intake and was 0.89 ([95% CI, 0.80-0.99];  $P =$   
55  
56 306 0.040) in five studies<sup>14,44-46,50</sup> adjusted for calcium. Only one study<sup>15</sup> adjusted for  
57  
58  
59 307 potassium intake in T2D, and one study<sup>36</sup> adjusted for cereal fiber in total stroke.  
60



308

309 **Subgroup Analysis**

310 Stratified analyses by characteristics of the population and study design were  
311 conducted on T2D (**Table 1**), total stroke, ischemic stroke and hemorrhagic stroke  
312 (**Table 2**). The inverse association with T2D remained robust across all subgroups  
313 with little evidence of heterogeneity. For stroke incidence, a decreased risk of total  
314 stroke and ischemic stroke was found in female participants (RR, 0.91 [95% CI,  
315 0.83-0.99] for total stroke; 0.89 [95% CI, 0.79-1.00] for ischemic stroke) and  
316 individuals with  $\geq 25$  kg/m<sup>2</sup> mean BMI (RR, 0.89 [95% CI, 0.82-0.96] for total stroke;  
317 0.88 [95% CI, 0.81-0.96] for ischemic stroke). When restricted to a  $\geq 12$  y follow-up,  
318 the risk of total stroke and ischemic stroke was significantly reduced (RR, 0.89 [95%  
319 CI, 0.83-0.95] for total stroke; 0.88 [95% CI, 0.81-0.95] for ischemic stroke). These  
320 risks were more reduced in North American and European individuals than in Asians.  
321 Cardiovascular events (CV events, coronary heart disease, heart failure, atrial  
322 fibrillation, self-reported heart disease, etc. other than stroke), hypercholesterolemia  
323 and diabetes would blunt the effect of magnesium on total and ischemic stroke.  
324 However, magnesium intake could still, or at least, demonstrate the trend to decrease  
325 total and ischemic stroke in individuals even with those risk factors. Similarly, CV  
326 events, hypercholesterolemia and family diabetes history had no substantial impact on  
327 the inverse association between T2D incidence and magnesium intake. We did not  
328 find a significantly reduced risk of hemorrhagic stroke in the subgroup analyses.

329

## 330 **Dose-Response Analysis**

331 In this part, both linear and nonlinear relationships were found in T2D (**Figure 3A**), in  
332 total stroke (**Figure 3B**), and in ischemic stroke (**Figure 3C**). However, no linear or  
333 nonlinear dose-response relationship was observed in hemorrhagic stroke (**Figure 3D**)  
334 along with the subtypes including subarachnoid hemorrhage and intracerebral  
335 hemorrhage (**Figure S15**).

336 Specifically, we calculated the RR for the magnesium increments if a linear  
337 relationship was found. The calculated RR was 0.94 ([95% CI, 0.93-0.95]) for the 100  
338 mg/day increment for T2D. For total stroke, the summary RR was 0.98 ([95% CI,  
339 0.97-0.99]) related to a 100 mg/day increment in magnesium intake, and the RR for  
340 ischemic stroke was 0.98 ([95% CI, 0.97-0.99]) related to a 100 mg/day increment in  
341 magnesium intake. There was no RR cut-off point at which the decreasing trend  
342 reversed, but the RR decreased slightly rapidly with any slight decreases at  
343 approximately 260 mg/day for T2D and 350 mg/day for total/ischemic stroke.  
344 However, there was substantial uncertainty in the lower range of this distribution  
345 (**Figure 3A, 3B, 3C**).

## 347 **Discussion**

### 348 **Main findings**

349 This paper used a general and up-to-date search strategy to identify additional studies  
350 that were missed in prior meta-analyses under real-world conditions. Our results  
351 support a significant inverse association between magnesium consumption and T2D,

1  
2  
3  
4 352 total stroke and ischemic stroke at the highest level vs. the lowest. No significant  
5  
6 353 association for hemorrhagic stroke, subarachnoid hemorrhage or intracerebral  
7  
8  
9 354 hemorrhage was detected. Female obese participants (mean BMI  $\geq$  25 kg/m<sup>2</sup>) with a  
10  
11 355 longer follow-up period ( $\geq$  12 y) might obtain greater benefit from magnesium intake  
12  
13  
14 356 with a lower risk of total and ischemic stroke incidence. In subgroup analyses, the RR  
15  
16  
17 357 of stroke risk was highly decreased among North American and European individuals.  
18  
19 358 Significant risk was reduced by 6%, 2%, and 2% for T2D, total stroke and ischemic  
20  
21  
22 359 stroke, respectively, per 100 mg/day increment in magnesium intake level. Overall,  
23  
24  
25 360 our study supports the guidelines to address the role of magnesium intake in early  
26  
27 361 prevention strategies to combat T2D and stroke. However, additional randomized  
28  
29  
30 362 controlled trials (RCTs) are needed in the future to validate the causality.  
31  
32  
33 363

### 364 **Clinical implications**

365 Dietary nutrients are popular topics for current clinical medicine; folic acid, vitamin  
366 D, and  $\omega$ -3 fatty acids have been specifically recommended to pregnant women,  
367 infants and children, and the elderly<sup>62,63</sup>. However, magnesium has been less  
368 extensively discussed. This is a noteworthy study for the following reasons. First, the  
369 current study reinforces the possible role of magnesium in the prevention and  
370 management of two chronic illnesses and invites new considerations regarding the  
371 potential avoidance of other chronic diseases through dietary strategies. Second, this  
372 comprehensive study including nearly two million individuals and possessing  
373 abundant statistical power provides confirmatory evidence for medical practitioners,

1  
2  
3  
4 374 health educators and policymakers. Third, to date, no related paper has discussed such  
5  
6 375 detailed stratified analyses; thus, this work helps physicians amplify dietary benefits  
7  
8  
9 376 through individualized strategies. Interestingly, North American and European  
10  
11 377 participants seemed to receive more benefits from magnesium intake than Asians.  
12  
13  
14 378 Fourth, to the best of our knowledge, this is the first study in which a cumulative  
15  
16  
17 379 meta-analysis was performed to predict changes in the tendency of main risk  
18  
19 380 estimates. Based on past and current cutting edge evidence about nutrition and T2D  
20  
21  
22 381 prevention, the US Diabetes Prevention Program (DPP) conducted a study and  
23  
24 382 demonstrated that proper lifestyle modification (exercise and Mediterranean diet)  
25  
26 383 significantly reduced T2D risk irrespective of population baselines, and this benefit  
27  
28  
29 384 was enhanced with increased follow-up<sup>64</sup>. The UK National Health Service (UK  
30  
31  
32 385 NHS) will launch an intervention program including weight loss, nutrition,  
33  
34  
35 386 monitoring and peer support targeting up to 10 000 people prone to develop T2D<sup>65</sup>.

37  
38 387 The 2018 American Diabetes Association (ADA) guidelines<sup>66</sup> recommend that  
39  
40 388 the intake of nuts, berries, yogurt, coffee and tea be increased in individuals who are  
41  
42  
43 389 at high risk of diabetes. The latest guidelines by the American Heart Association  
44  
45 390 (AHA)/American Stroke Association (ASA)<sup>9</sup> also validate the considerable status of  
46  
47  
48 391 early management of stroke (ischemic stroke). In fact, magnesium is a cofactor in  
49  
50  
51 392 enzyme systems that regulate diverse biomedical reactions, including protein  
52  
53 393 synthesis, muscle and nerve transmission, neuromuscular conduction, signal  
54  
55  
56 394 transduction blood glucose control and blood pressure management<sup>67</sup>. Magnesium  
57  
58 395 also plays a role in transporting calcium and potassium ions across the cell membrane  
59  
60

1  
2  
3  
4 396 and is crucial for the structural function of proteins, nucleic acids or mitochondria<sup>68</sup>.  
5  
6 397 In diabetes, magnesium is involved in glucose and insulin metabolism by regulating  
7  
8  
9 398 the tyrosine kinase activity of the insulin receptor. Magnesium also influences  
10  
11 399 phosphorylase B kinase activity by releasing glucose-1-phosphate from glycogen and  
12  
13  
14 400 regulates glucose translocation into the cell<sup>69</sup>. In stroke, higher magnesium levels lead  
15  
16  
17 401 to the deregulation of glutamate and calcium cation influx by reducing NMDA  
18  
19 402 receptor activity and blocking voltage-gated calcium channels, eliminating calcium  
20  
21  
22 403 cation cytotoxicity. Additionally, the vasodilatory effects of magnesium may benefit  
23  
24 404 ischemic stroke patients<sup>70</sup>. Indeed, a poor outcome of hemorrhagic stroke was  
25  
26  
27 405 observed in an RCT; however, high serum magnesium might be better for the  
28  
29  
30 406 prognosis of intracerebral hemorrhage<sup>71</sup>.

31  
32 407 Most specific nutrients, especially macronutrients, are correlated with total  
33  
34 408 energy intake. In the included free-living human studies, the variation in total energy  
35  
36 409 intake originated from differences in physical activity levels, body size, and energy  
37  
38 410 efficiency<sup>72</sup>. Thus, total energy intake can weaken the investigated association with  
39  
40 411 considerable nutrient intake if this covariable is not properly removed.  
41  
42  
43 412 Epidemiologists should assess the reproducibility and validity of energy-adjusted  
44  
45 413 nutrients as well as absolute nutrient intake. For micronutrients such as magnesium,  
46  
47  
48 414 an inverse association with T2D, total stroke and ischemic stroke outcomes could be  
49  
50  
51 415 still found after total energy intake adjustment. In terms of other nutrients, potassium  
52  
53  
54 416 intake is proposed to lower blood pressure (BP) and improve vascular outcomes  
55  
56  
57 417 (including stroke); dietary potassium may also be influential in glucose control and  
58  
59  
60

1  
2  
3  
4 418 limiting the risk of diabetes<sup>73</sup>. Vitamin D and calcium may negatively influence  
5  
6 419 glycemia, but the evidence is limited and mostly based on cross-sectional  
7  
8  
9 420 observational studies<sup>74</sup>. Calcium may be inversely associated with stroke in  
10  
11 421 populations with low to moderate calcium intakes, but no significant association was  
12  
13  
14 422 found between calcium and CVD<sup>75</sup>. Altogether, the results indicate that  
15  
16 423 magnesium-rich food such as nuts (151-567 mg/100 g edibles), fruits (132-448  
17  
18 424 mg/100 g edibles), vegetables (132-1257 mg/100 g edibles), legumes (138-243  
19  
20 425 mg/100 g edibles), fish (143-303 mg/100 g edibles) and total grain (134-306 mg/100 g  
21  
22 426 edibles) should be recommended to populations with insufficient magnesium intake.  
23  
24  
25  
26  
27  
28  
29

### 30 428 **Comparisons with other similar studies**

31  
32 429 This analysis has several differences from previous studies. Dong et al<sup>52</sup> found that  
33  
34 430 magnesium intake had an inverse association with T2D incidence (RR, 0.78 [95% CI,  
35  
36 431 0.73-0.84]), and with an intake of 100 mg/day magnesium, the risk was reduced by  
37  
38 432 14%. However, they failed to include adequate studies, and standard quality  
39  
40 433 assessments of eligible studies were absent. Individuals from multiple nations were  
41  
42 434 included in some studies<sup>18,25,26,32</sup> but were incorrectly assigned to Asia or the U.S. in  
43  
44 435 the subgroups; other minor issues also existed in the selection criteria, making it  
45  
46 436 unclear whether they excluded participants with subclinical diabetes. BMI was not a  
47  
48 437 potential modifier for T2D in our study due to the inclusion of more evidence with a  
49  
50 438 longer follow-up period. Fang et al<sup>76</sup> revealed that dietary magnesium was  
51  
52 439 significantly associated with a reduced risk of T2D (RR, 0.74 [95% CI, 0.69-0.80])  
53  
54  
55  
56  
57  
58  
59  
60

1  
2  
3  
4 440 and stroke (RR, 0.88 [95% CI, 0.82-0.95]). The results were comparable, but they  
5  
6 441 focused only on dietary magnesium intake rather than overall magnesium intake (total  
7  
8  
9 442 or dietary), and subtypes of total stroke were missing. To the best of our knowledge,  
10  
11 443 BMI, follow-up, family diabetes history, etc. are crucial confounders for evaluating  
12  
13  
14 444 the association, and these factors were not addressed in their study. Moreover, other  
15  
16  
17 445 researchers have better investigated the likelihood of a linear association in the  
18  
19 446 dose-response pattern (using methods by Greenland and Orsini et al.). For example,  
20  
21  
22 447 Fang et al<sup>77</sup> found that the 100 mg/day intake of dietary magnesium was associated  
23  
24 448 with an 8-13% reduction in T2D risk, and while a nonlinear relationship did not exist,  
25  
26  
27 449 a minor publication bias was present. Twenty-five studies were eligible; however,  
28  
29  
30 450 some of them focused not on dietary intake but rather on total magnesium intake.  
31  
32 451 Moreover, there were two included studies focusing on red meat intake instead of  
33  
34  
35 452 magnesium intake. After excluding ineligible studies, we found no evidence of  
36  
37  
38 453 publication bias. Additionally, both linear and nonlinear relationships existed for T2D  
39  
40  
41 454 because the RRs of the highest category of magnesium intake vs. the lowest in our  
42  
43 455 pooled study were still used. A study by Larsson et al<sup>53</sup> including 7 studies supported  
44  
45  
46 456 a modest but statistically significant inverse association between dietary magnesium  
47  
48 457 intake and stroke. However, the sample size was quite small, and there was no useful  
49  
50  
51 458 information on stroke subtypes (e.g., ischemic stroke, hemorrhagic stroke) in the main  
52  
53  
54 459 analysis. In our opinion, a well-designed subgroup analysis is compulsory, and a  
55  
56 460 pooled stroke result restricted by potassium and calcium adjustment is recommended.  
57  
58  
59 461 The current study found that magnesium intake was strongly inversely associated with  
60

1  
2  
3  
4 462 total stroke and ischemic stroke, which still existed in the dose-response pattern.  
5  
6

7 463  
8

#### 9 464 **Directions for future research**

10  
11 465 Future studies are needed to address some remaining questions. At first, no significant  
12  
13  
14 466 association was found for hemorrhagic stroke; however, a beneficial trend was  
15  
16  
17 467 observed in the cumulative meta-analysis, which highlights the need for more updated  
18  
19  
20 468 prospective studies and RCTs. Second, there is a key question regarding the optimal  
21  
22  
23 469 time to start prevention and methods to screen severe complications. Cardiovascular  
24  
25 470 events occur in more than 50% of patients with diabetes, and diabetic kidney disease  
26  
27 471 occurs in 20-40%. Additionally, cardiovascular events increase the risk of death three-  
28  
29  
30 472 to fourfold compared with patients without such complications. A sustained period of  
31  
32  
33 473 intensive glucose control early in T2D has been confirmed to reduce complication  
34  
35 474 rates<sup>78</sup>. Most importantly, for the public, educators and policymakers, promoting  
36  
37  
38 475 magnesium-rich food consumption can translate into considerable benefit in  
39  
40 476 preventing T2D and total stroke, especially for high-risk populations.  
41  
42

43 477  
44

#### 45 478 **Limitations**

46  
47  
48 479 This work has several limitations that deserve further discussion. First, this  
49  
50  
51 480 group-level meta-analysis is insufficient. Although strong inverse associations for  
52  
53  
54 481 T2D and total stroke were reported, individual-level studies having more detection  
55  
56 482 power are required. Second, several variations cannot be totally understood; for  
57  
58  
59 483 example, we cannot exclude the possibility that other nutrients and/or dietary  
60



1  
2  
3  
4 484 components correlated with dietary magnesium may have been responsible, either  
5  
6 485 partially or entirely, for the observed associations. Based on eligible studies, we could  
7  
8  
9 486 not quantify the impact of supplementary magnesium (not combined with dietary  
10  
11 487 intake) on T2D and stroke incidence. The real effect of some dietary supplements on  
12  
13  
14 488 T2D or cardiovascular disease has proven very interesting to a number of medical  
15  
16  
17 489 experts, clinicians and nutrition educators. Third, FFQs/validated FFQs mostly used  
18  
19  
20 490 in primary studies could not characterize all the nutrients, which misclarified plausible  
21  
22 491 associations. It was suggested that magnesium-specific food questionnaires and/or  
23  
24  
25 492 food records should be reasonably used for accurate magnesium intake estimation.  
26  
27  
28 493 Finally, additional RCT are needed, as observational studies might only reach one  
29  
30 494 conclusion (i.e., magnesium intake is inversely associated with T2D incidence) and  
31  
32  
33 495 cannot prove causality.

34  
35 496

### 37 497 **Conclusion**

38  
39  
40 498 Magnesium intake has a substantial inverse association with T2D and total stroke.  
41  
42  
43 499 Among these populations, magnesium consumption can be recommended as an  
44  
45  
46 500 optimization for T2D, total stroke and ischemic stroke primary prevention or early  
47  
48  
49 501 management. In particular, the greater the magnesium intake is, the greater the  
50  
51  
52 502 reduction in risk. As patients, physicians, policy makers and legislators debate these  
53  
54  
55 503 issues, such a cost-effective alternative is needed to inform policy decisions and aid in  
56  
57  
58 504 reforming nutritional health care worldwide.

59 505  
60

1  
2  
3  
4 506 **Acknowledgements:** The authors thank professor Yanhua Tang, MD (The second  
5  
6 507 affiliated hospital of Nanchang University) for her advice and professor Xiaoshu  
7  
8 508 Cheng, MD, PhD (The second affiliated hospital of Nanchang University) for his data  
9  
10  
11 509 collection.  
12  
13

14 510  
15  
16  
17 511 **Competing interests**

18  
19 512 None declared  
20  
21

22 513

23  
24  
25 514 **Provenance and peer review**

26  
27 515 Not commissioned; externally peer reviewed.  
28  
29

30 516

31  
32 517 **Data availability statement**

33  
34  
35 518 All data relevant to the study are included in the article or uploaded as supplementary  
36  
37 519 information.  
38  
39

40 520

41  
42  
43 521 **Patient consent for publication**

44  
45 522 Not required.  
46  
47

48 523

49  
50 524 **Funding Sources**

51  
52  
53 525 This study was supported by National Natural Science Foundation of China (NSFC),  
54  
55 526 number of grants (81560345), Natural Science Foundation of Jiangxi Province (Grant  
56  
57 527 number: 20161BAB215237).  
58  
59  
60

1  
2  
3  
4 528

5  
6 529 **Author Contribution:** Binghao Zhao had full access to all of the data in the  
7  
8 530 manuscript and takes responsibility for the integrity of the data and the accuracy of  
9  
10 531 the data analysis.

11 532 Concept and design: All authors.

12  
13 533 Acquisition, analysis, or interpretation of data: All authors.

14 534 Drafting of the manuscript: Binghao Zhao and Wenxiong Zhang.

15  
16 535 Critical revision of the manuscript for important intellectual content: Binghao Zhao,

17  
18 536 Lianli Zeng, Jiani Zhao, Qian Wu, Fang Zou, Li Gan and Yifei Dong.

19  
20 537 Statistical analysis: Binghao Zhao.

21  
22 538 Supervision: Wenxiong Zhang and Yiping Wei

23  
24  
25  
26 539

27  
28 540 **Reference**

29  
30  
31 541 1. Centers for Disease Control and Prevention. National Diabetes Statistics Report,  
32  
33 542 2017. Atlanta, GA: Centers for Disease Control and Prevention, US Department of  
34  
35 543 Health and Human Services; 2017.

36  
37  
38 544 2. NCD Risk Factor Collaboration (NCD-RisC). Worldwide trends in diabetes since  
39  
40 545 1980: a pooled analysis of 751 population-based studies with 4.4 million participants.  
41  
42 546 Lancet. 2016;387(10027):1513-1530.

43  
44  
45 547 3. Benjamin EJ, Blaha MJ, Chiuve SE, Cushman M, Das SR, Deo R, et al. Heart  
46  
47 548 Disease and Stroke Statistics-2017 Update: A Report From the American Heart  
48  
49 549 Association. Circulation. 2017;135(10):e146-e603.

50  
51  
52 550 4. Feigin VL, Forouzanfar MH, Krishnamurthi R, Mensah GA, Connor M, Bennett  
53  
54 551 DA, et al. Global and regional burden of stroke during 1990-2010: findings from the  
55  
56 552 Global Burden of Disease Study 2010. Lancet. 2014;383(9913):245-254.

- 1  
2  
3  
4 553 5. Barbagallo M, Dominguez LJ. Magnesium metabolism in type 2 diabetes  
5  
6 554 mellitus, metabolic syndrome and insulin resistance. Arch Biochem Biophys.  
7  
8  
9 555 2007;458(1):40-47.  
10  
11 556 6. Zhao L, Zhang F, Ding X, Wu G, Lam YY, Wang X, et al. Gut bacteria  
12  
13 557 selectively promoted by dietary fibers alleviate type 2 diabetes. Science.  
14  
15 558 2018;359(6380):1151-1156.  
16  
17 559 7. Reffelmann T, Ittermann T, Dörr M, Völzke H, Reinthaler M, Petersmann A, et  
18  
19 560 al. Low serum magnesium concentrations predict cardiovascular and all-cause  
20  
21 561 mortality. Atherosclerosis. 2011;219(1):280-284.  
22  
23 562 8. Fadelu T, Zhang S, Niedzwiecki D, Ye X, Saltz LB, Mayer RJ, et al. Nut  
24  
25 563 Consumption and Survival in Patients With Stage III Colon Cancer: Results From  
26  
27 564 CALGB 89803 (Alliance). J Clin Oncol. 2018;36(11):1112-1120.  
28  
29 565 9. Powers WJ, Rabinstein AA, Ackerson T, Adeoye OM, Bambakidis NC, Becker  
30  
31 566 K, et al. 2018 Guidelines for the Early Management of Patients With Acute Ischemic  
32  
33 567 Stroke: A Guideline for Healthcare Professionals From the American Heart  
34  
35 568 Association/American Stroke Association. Stroke. 2018;49(3):e46-e110.  
36  
37 569 10. Brignole M, Moya A, de Lange FJ, Deharo JC, Elliott PM, Fanciulli A, et al.  
38  
39 570 2018 ESC Guidelines for the diagnosis and management of syncope. Eur Heart J.  
40  
41 571 2018:ehy037.  
42  
43 572 11. Salmerón J, Ascherio A, Rimm EB, Colditz GA, Spiegelman D, Jenkins DJ, et al.  
44  
45 573 Dietary Fiber, Glycemic Load, and Risk of NIDDM in Men. Diabetes care.  
46  
47 574 1997;20(4):545-550.  
48  
49  
50  
51  
52  
53  
54  
55  
56  
57  
58  
59  
60

- 1  
2  
3  
4 575 12. Salmeron J, Manson JE, Stampfer MJ, Colditz GA, Wing AL, Willett WC.  
5  
6 576 Dietary fiber, glycemic load, and risk of non-insulin-dependent diabetes mellitus in  
7  
8  
9 577 women. *JAMA*. 1997;277(6):472-477.  
10  
11 578 13. Ascherio A, Rimm EB, Hernán MA, Giovannucci EL, Kawachi I, Stampfer MJ,  
12  
13  
14 579 et al. Intake of potassium, magnesium, calcium, and fiber and risk of stroke among  
15  
16  
17 580 US men. *Circulation*. 1998;98(12):1198-1204.  
18  
19 581 14. Iso H, Stampfer MJ, Manson JE, Rexrode K, Hennekens CH, Colditz GA, et al.  
20  
21  
22 582 Prospective study of calcium, potassium, and magnesium intake and risk of stroke in  
23  
24  
25 583 women. *Stroke*. 1999;30(9):1772-1779.  
26  
27 584 15. Kao WH, Folsom AR, Nieto FJ, Mo JP, Watson RL, Brancati FL. Serum and  
28  
29  
30 585 dietary magnesium and the risk for type 2 diabetes mellitus: the Atherosclerosis Risk  
31  
32  
33 586 in Communities Study. *Arch Intern Med*. 1999;159(18):2151-2159.  
34  
35 587 16. Liu S, Manson JE, Stampfer MJ, Hu FB, Giovannucci E, Colditz GA, et al. A  
36  
37  
38 588 prospective study of whole-grain intake and risk of type 2 diabetes mellitus in US  
39  
40  
41 589 women. *Am J Public Health*. 2000;90(9):1409-1415.  
42  
43 590 17. Meyer KA, Kushi LH, Jacobs DR, Jr., Slavin J, Sellers TA, Folsom AR.  
44  
45  
46 591 Carbohydrates, dietary fiber, and incident type 2 diabetes in older women. *Am J*  
47  
48  
49 592 *ClinNutr*. 2000;71(4):921-930.  
50  
51 593 18. Hodge AM, English DR, O'Dea K, Giles GG. Glycemic index and dietary fiber  
52  
53  
54 594 and the risk of type 2 diabetes. *Diabetes care*. 2004;27(11):2701-2706.  
55  
56 595 19. Lopez-Ridaura R, Willett WC, Rimm EB, Liu S, Stampfer MJ, Manson JE, et al.  
57  
58  
59 596 Magnesium intake and risk of type 2 diabetes in men and women. *Diabetes care*.  
60

- 1  
2  
3  
4 597 2004;27(1):134-140.  
5  
6  
7 598 20. Song Y, Manson JE, Buring JE, Liu S. Dietary magnesium intake in relation to  
8  
9 599 plasma insulin levels and risk of type 2 diabetes in women. *Diabetes care*.  
10  
11 600 2004;27(1):59-65.  
12  
13  
14 601 21. Song Y, Manson JE, Cook NR, Albert CM, Buring JE, Liu S. Dietary magnesium  
15  
16 602 intake and risk of cardiovascular disease among women. *Am J Cardiol*.  
17  
18 603 2005;96(8):1135-1141.  
19  
20  
21 604 22. Liu S, Choi HK, Ford E, Song Y, Klevak A, Buring JE, et al. A prospective study  
22  
23 605 of dairy intake and the risk of type 2 diabetes in women. *Diabetes care*.  
24  
25 606 2006;29(7):1579-1584.  
26  
27  
28 607 23. Pereira MA, Parker ED, Folsom AR. Coffee consumption and risk of type 2  
29  
30 608 diabetes mellitus: an 11-year prospective study of 28812 postmenopausal women.  
31  
32 609 *Arch Intern Med*. 2006;166(12):1311-1316.  
33  
34  
35 610 24. Pittas AG, Dawson-Hughes B, Li T, Van Dam RM, Willett WC, Manson JE, et  
36  
37 611 al. Vitamin D and calcium intake in relation to type 2 diabetes in women. *Diabetes*  
38  
39 612 *care*. 2006;29(3):650-656.  
40  
41  
42 613 25. Van Dam RM, Hu FB, Rosenberg L, Krishnan S, Palmer JR. Dietary calcium and  
43  
44 614 magnesium, major food sources, and risk of type 2 diabetes in U.S. black women.  
45  
46 615 *Diabetes care*. 2006;29(10):2238-2243.  
47  
48  
49 616 26. Schulze MB, Schulz M, Heidemann C, Schienkiewitz A, Hoffmann K, Boeing H.  
50  
51 617 Fiber and magnesium intake and incidence of type 2 diabetes: a prospective study and  
52  
53 618 meta-analysis. *Arch Intern Med*. 2007;167(9):956-965.  
54  
55  
56  
57  
58  
59  
60

- 1  
2  
3  
4 619 27. Larsson SC, Virtanen MJ, Mars M, Männistö S, Pietinen P, Albanes D, et al.  
5  
6 620 Magnesium, calcium, potassium, and sodium intakes and risk of stroke in male  
7  
8  
9 621 smokers. *Arch Intern Med.* 2008;168(5):459-465.  
10  
11 622 28. Weng LC, Yeh WT, Bai CH, Chen HJ, Chuang SY, Chang HY, et al. Is ischemic  
12  
13 623 stroke risk related to folate status or other nutrients correlated with folate intake?  
14  
15 624 *Stroke.* 2008;39(12):3152-3158.  
16  
17 625 29. Kirii K, Mizoue T, Iso H, Takahashi Y, Kato M, Inoue M, et al. Calcium, vitamin  
18  
19 626 D and dairy intake in relation to type 2 diabetes risk in a Japanese cohort.  
20  
21 627 *Diabetologia.* 2009;52(12):2542-2550.  
22  
23 628 30. Ohira T, Peacock JM, Iso H, Chambless LE, Rosamond WD, Folsom AR. Serum  
24  
25 629 and Dietary Magnesium and Risk of Ischemic Stroke: The Atherosclerosis Risk in  
26  
27 630 Communities Study. *Am J Epidemiol.* 2009;169(12):1437-1444.  
28  
29 631 31. Villegas R, Gao YT, Dai Q, Yang G, Cai H, Li H, et al. Dietary calcium and  
30  
31 632 magnesium intakes and the risk of type 2 diabetes: the Shanghai Women's Health  
32  
33 633 Study. *Am J Clin Nutr.* 2009;89(4):1059-1067.  
34  
35 634 32. Hopping BN, Erber E, Grandinetti A, Verheus M, Kolonel LN, Maskarinec G.  
36  
37 635 Dietary fiber, magnesium, and glycemic load alter risk of type 2 diabetes in a  
38  
39 636 multiethnic cohort in hawaii. *J Nutr.* 2010;140(1):68-74.  
40  
41 637 33. Kim DJ, Xun P, Liu K, Loria C, Yokota K, Jacobs DR Jr, et al. Magnesium  
42  
43 638 Intake in Relation to Systemic Inflammation, Insulin Resistance, and the Incidence of  
44  
45 639 Diabetes. *Diabetes care.* 2010;33(12):2604-2610.  
46  
47 640 34. Kirii K, Iso H, Date C, Fukui M, Tamakoshi A, JACC Study Group. Magnesium  
48  
49  
50  
51  
52  
53  
54  
55  
56  
57  
58  
59  
60

- 1  
2  
3  
4 641 intake and risk of self-reported type 2 diabetes among Japanese. *J Am Coll Nutr.*  
5  
6 642 2010;29(2):99-106.  
7  
8  
9 643 35. Nanri A, Mizoue T, Noda M, Takahashi Y, Kirii K, Inoue M, et al. Magnesium  
10  
11 644 intake and type II diabetes in Japanese men and women: the Japan Public Health  
12  
13 645 Center-based Prospective Study. *Eur J Clin Nutr.* 2010;64(10):1244-1247.  
14  
15  
16 646 36. Larsson SC, Virtamo J, Wolk A. Potassium, calcium, and magnesium intakes and  
17  
18 647 risk of stroke in women. *Am J Epidemiol.* 2011;174(1):35-43.  
19  
20  
21 648 37. Weng LC, Lee NJ, Yeh WT, Ho LT, Pan WH. Lower intake of magnesium and  
22  
23 649 dietary fiber increases the incidence of type 2 diabetes in Taiwanese. *J Formos Med*  
24  
25 650 *Assoc.* 2012;111(11):651-659.  
26  
27  
28 651 38. Zhang W, Iso H, Ohira T, Date C, Tamakoshi A, JACC Study Group.  
29  
30 652 Associations of dietary magnesium intake with mortality from cardiovascular disease:  
31  
32 653 the JACC study. *Atherosclerosis.* 2012;221(2):587-595.  
33  
34  
35 654 39. Hata A, Doi Y, Ninomiya T, Mukai N, Hirakawa Y, Hata J, et al. Magnesium  
36  
37 655 intake decreases Type 2 diabetes risk through the improvement of insulin resistance  
38  
39 656 and inflammation: the Hisayama Study. *Diabet Med.* 2013;30(12):1487-1494.  
40  
41  
42 657 40. Lin PH, Yeh WT, Svetkey LP, Chuang SY, Chang YC, Wang C, et al. Dietary  
43  
44 658 intakes consistent with the DASH dietary pattern reduce blood pressure increase with  
45  
46 659 age and risk for stroke in a Chinese population. *Asia Pac J Clin Nutr.*  
47  
48 660 2013;22(3):482-491.  
49  
50  
51 661 41. Oba S, Nanri A, Kurotani K, Goto A, Kato M, Mizoue T, et al. Dietary glycemic  
52  
53 662 index, glycemic load and incidence of type 2 diabetes in Japanese men and women:  
54  
55  
56  
57  
58  
59  
60



- 1  
2  
3  
4 663 the Japan Public Health Center-based Prospective Study. *Nutr J.* 2013;12(1):165.  
5  
6 664 42. Sluijs I, Czernichow S, Beulens Jwj. Dietary electrolytes and risk of ischemic  
7  
8 665 stroke. *Eur J Prev Cardiol.* 2013;20(1):S76.  
9  
10  
11 666 43. Hruby A, Meigs JB, O'Donnell CJ, Jacques PF, Mckeown NM. Higher  
12  
13 667 Magnesium Intake Reduces Risk of Impaired Glucose and Insulin Metabolism and  
14  
15 668 Progression From Prediabetes to Diabetes in Middle-Aged Americans. *Am J Dis*  
16  
17 669 *Child.* 2014;37(2):419-427.  
18  
19  
20 670 44. Sluijs I, Czernichow S, Beulens JW, Boer JM, van der Schouw YT, Verschuren  
21  
22 671 WM, et al. Intakes of potassium, magnesium, and calcium and risk of stroke. *Stroke.*  
23  
24 672 2014;45(4):1148-1150.  
25  
26  
27 673 45. Adebamowo SN, Spiegelman D, Flint AJ, Willett WC, Rexrode KM. Intakes of  
28  
29 674 magnesium, potassium, and calcium and the risk of stroke among men. *Int J Stroke.*  
30  
31 675 2015;10(7):1093-1100.  
32  
33  
34 676 46. Adebamowo SN, Spiegelman D, Willett WC, Rexrode KM. Association between  
35  
36 677 intakes of magnesium, potassium, and calcium and risk of stroke: 2 cohorts of US  
37  
38 678 women and updated meta-analyses. *Am J Clin Nutr.* 2015;101(6):1269-1277.  
39  
40  
41 679 47. Bain LK, Myint PK, Jennings A, Lentjes MA, Luben RN, Khaw KT, et al. The  
42  
43 680 relationship between dietary magnesium intake, stroke and its major risk factors,  
44  
45 681 blood pressure and cholesterol, in the EPIC-Norfolk cohort. *Int J Cardiol.*  
46  
47 682 2015;196:108-114.  
48  
49  
50 683 48. Huang Y-C, Wahlqvist ML, Kao M-D, Wang J-L, Lee M-S. Optimal Dietary and  
51  
52 684 Plasma Magnesium Statuses Depend on Dietary Quality for a Reduction in the Risk of  
53  
54  
55  
56  
57  
58  
59  
60

- 1  
2  
3  
4 685 All-Cause Mortality in Older Adults. *Nutrients*. 2015;7(7):5664-5683.  
5  
6 686 49. Hruby A, Guasch-Ferré M, Bhupathiraju SN, Manson JE, Willett WC, McKeown  
7  
8 687 NM, et al. Magnesium Intake, Quality of Carbohydrates, and Risk of Type 2 Diabetes:  
9  
10 688 Results From Three U.S. Cohorts. *Diabetes care*. 2017;40(12):1695-1702.  
11  
12  
13  
14 689 50. Kokubo Y, Saito I, Iso H, Yamagishi K, Yatsuya H, Ishihara J, et al. Dietary  
15  
16 690 magnesium intake and risk of incident coronary heart disease in men: A prospective  
17  
18 691 cohort study. *Clin Nutr*. 2018;37(5):1602-1608.  
19  
20  
21  
22 692 51. Konishi K, Wada K, Tamura T, Tsuji M, Kawachi T, Nagata C. Dietary  
23  
24 693 magnesium intake and the risk of diabetes in the Japanese community: results from  
25  
26 694 the Takayama study. *Eur J Nutr*. 2017;56(2):767-774.  
27  
28  
29  
30 695 52. Dong JY, Xun P, He K, Qin LQ. Magnesium intake and risk of type 2 diabetes:  
31  
32 696 meta-analysis of prospective cohort studies. *Diabetes care*. 2011;34(9):2116-2122.  
33  
34  
35 697 53. Larsson SC, Orsini N, Wolk A. Dietary magnesium intake and risk of stroke: a  
36  
37 698 meta-analysis of prospective studies. *Am J Clin Nutr*. 2012;95(2):362-366.  
38  
39  
40 699 54. Adams HP Jr, Bendixen BH, Kappelle LJ, Biller J, Love BB, Gordon DL, et al.  
41  
42 700 Classification of subtype of acute ischemic stroke. Definitions for use in a multicenter  
43  
44 701 clinical trial. TOAST. Trial of Org 10172 in Acute Stroke Treatment. *Stroke*.  
45  
46 702 1993;24(1):35-41.  
47  
48  
49  
50 703 55. Rannikmäe K, Woodfield R, Anderson CS, Charidimou A, Chiewvit P,  
51  
52 704 Greenberg SM, et al. Reliability of intracerebral hemorrhage classification systems: A  
53  
54 705 systematic review. *Int J Stroke*. 2016;11(6):626-636.  
55  
56  
57  
58 706 56. GA Wells, B Shea, D O'Connell, J Peterson, V Welch, M Losos. The Newcastle–  
59  
60

- 1  
2  
3  
4 707 Ottawa Scale (NOS) for Assessing the Quality of Non-Randomized Studies in  
5  
6 708 Meta-Analysis. *Appl Eng Agric*. 2014;18(6): 727-734.  
7  
8  
9 709 57. Higgins JP, Thompson SG, Deeks JJ, Altman DG. Measuring inconsistency in  
10  
11 710 meta-analyses. *BMJ*. 2003;327(7414):557-560.  
12  
13  
14 711 58. Greenland S, Longnecker MP. Methods for trend estimation from summarized  
15  
16 712 dose-response data, with applications to meta-analysis. *Am J Epidemiol*.  
17  
18 713 1992;135(11):1301-1309.  
19  
20  
21 714 59. Orsini N, Bellocco R, Greenland S. Generalized least squares for trend estimation  
22  
23 715 of summarized dose-response data. *Stata J*. 2006;6(6):40-57.  
24  
25  
26 716 60. Begg CB, Mazumdar M. Operating characteristics of a rank correlation test for  
27  
28 717 publication bias. *Biometrics*. 1994;50(4):1088-1101.  
29  
30  
31 718 61. Egger M, Davey Smith G, Schneider M, Minder C. Bias in meta-analysis detected  
32  
33 719 by a simple, graphical test. *BMJ*. 1997;315(7109):629-634.  
34  
35  
36 720 62. Manson JE, Bassuk SS. Vitamin and mineral supplements: What clinicians need  
37  
38 721 to know. *JAMA*. 2018;319(9):859-860.  
39  
40  
41 722 63. Papanicolaos I, Woskie LR, Jha AK. Health Care Spending in the United States and  
42  
43 723 Other High-Income Countries. *JAMA*. 2018;319(10):1024-1039.  
44  
45  
46 724 64. Group DPP, Temprosa M. Long-term effects of lifestyle intervention or  
47  
48 725 metformin on diabetes development and microvascular complications over 15-year  
49  
50 726 follow-up: the Diabetes Prevention Program Outcomes Study. *Lancet Diabetes*  
51  
52 727 *Endocrinol*. 2015;3(11):866-875.  
53  
54  
55 728 65. Maruthappu M, Sood H, Keogh B. Radically upgrading diabetes prevention in  
56  
57  
58  
59  
60

- 1  
2  
3  
4 729 England. *Lancet Diabetes Endocrinol.* 2015;3(5):312-313.
- 5  
6 730 66. American Diabetes Association. Prevention or Delay of Type 2 Diabetes:  
7  
8  
9 731 Standards of Medical Care in Diabetes-2018. *Diabetes care.* 2018;41(1):S51-S54.
- 10  
11 732 67. Guerrero-Romero F, Simental-Mendía LE, Hernández-Ronquillo G,  
12  
13  
14 733 Rodríguez-Morán M. Oral magnesium supplementation improves glycaemic status in  
15  
16  
17 734 subjects with prediabetes and hypomagnesaemia: A double-blind placebo-controlled  
18  
19  
20 735 randomized trial. *Diabetes Metab.* 2015;41(3):202-207.
- 21  
22 736 68. Ramadass S, Basu S, Srinivasan AR. SERUM magnesium levels as an indicator  
23  
24  
25 737 of status of Diabetes Mellitus type 2. *Diabetes Metab Syndr.* 2015;9(1):42-45.
- 26  
27 738 69. Eimerl S, Schramm M. The Quantity of Calcium that Appears to Induce Neuronal  
28  
29  
30 739 Death. *J Neurochem.* 2010;62(3):1223-1226.
- 31  
32 740 70. Wm VDB, Algra A, Van KF, et al. Magnesium sulfate in aneurysmal  
33  
34  
35 741 subarachnoid hemorrhage: a randomized controlled trial. *Stroke.*  
36  
37  
38 742 2005;36(5):1011-1015.
- 39  
40 743 71. Goyal N, Tsivgoulis G, Malhotra K, Houck AL, Khorchid YM, Pandhi A, et al.  
41  
42  
43 744 Serum Magnesium Levels and Outcomes in Patients With Acute Spontaneous  
44  
45  
46 745 Intracerebral Hemorrhage. *J Am Heart Assoc.* 2018;7(8): e008698.
- 47  
48 746 72. Willett WC, Howe GR, Kushi LH. Adjustment for total energy intake in  
49  
50  
51 747 epidemiologic studies. *Am J Clin Nutr.* 1997;65(4):1220S-1228S; discussion  
52  
53  
54 748 1229S-1231S.
- 55  
56 749 73. Stone MS, Martyn L, Weaver CM. Potassium Intake, Bioavailability,  
57  
58  
59 750 Hypertension, and Glucose Control. *Nutrients.* 2016;8(7): E444.
- 60

- 1  
2  
3  
4 751 74. Pittas AG, Lau J, Hu FB, Dawson-Hughes B. The role of vitamin D and calcium  
5  
6 752 in type 2 diabetes. A systematic review and meta-analysis. *J Clin Endocrinol Metab.*  
7  
8  
9 753 2007;92(6): 2017-2029.  
10  
11 754 75. Larsson SC, Orsini N, Wolk A. Dietary calcium intake and risk of stroke: a  
12  
13  
14 755 dose-response meta-analysis. *Am J Clin Nutr.*2013;97(5): 951-957.  
15  
16  
17 756 76. Fang X, Wang K, Han D, He X, Wei J, Zhao L, et al. Dietary magnesium intake  
18  
19  
20 757 and the risk of cardiovascular disease, type 2 diabetes, and all-cause mortality: a  
21  
22 758 dose-response meta-analysis of prospective cohort studies. *BMC Med.*  
23  
24  
25 759 2016;14(1):210.  
26  
27 760 77. Fang X, Han H, Li M, Liang C, Fan Z, Aaseth J, et al. Dose-Response  
28  
29  
30 761 Relationship between Dietary Magnesium Intake and Risk of Type 2 Diabetes  
31  
32 762 Mellitus: A Systematic Review and Meta-Regression Analysis of Prospective Cohort  
33  
34  
35 763 Studies. *Nutrients.* 2016;8(11):739.  
36  
37  
38 764 78. Riddle MC, Ambrosius WT, Brillon DJ, Buse JB, Byington RP, Cohen RM, et al.  
39  
40 765 Epidemiologic Relationships Between A1C and All-Cause Mortality During a Median  
41  
42  
43 766 3.4-Year Follow-up of Glycemic Treatment in the ACCORD Trial. *Diabetes care.*  
44  
45  
46 767 2010;33(5):983-990.  
47  
48  
49  
50  
51  
52  
53  
54  
55  
56  
57  
58  
59  
60

768 **Table 1** Subgroup Analysis relating to Magnesium Intake and Type 2 Diabetes (T2D)

| Group                                                                | T2D            |                  |          |                     |           |                   |
|----------------------------------------------------------------------|----------------|------------------|----------|---------------------|-----------|-------------------|
|                                                                      | No. of studies | RR (95% CI)      | $P_{ES}$ | $P_{heterogeneity}$ | $I^2$ (%) | $P_{interaction}$ |
| Total                                                                | 26             | 0.78 (0.75-0.81) | < 0.001  | 0.021               | 35.6      | NA                |
| <b>Participants region</b>                                           | 26             |                  |          |                     |           | 0.905             |
| North America                                                        | 13             | 0.77 (0.73-0.82) | < 0.001  | 0.048               | 39.5      |                   |
| Europe                                                               | 0              | NA               | NA       | NA                  | NA        |                   |
| Asia                                                                 | 9              | 0.78 (0.71-0.87) | < 0.001  | 0.165               | 21.7      |                   |
| Multiple nations                                                     | 4              | 0.79 (0.71-0.88) | < 0.001  | 0.048               | 58.3      |                   |
| <b>Sex<sup>a</sup></b>                                               | 34             |                  |          |                     |           | 0.284             |
| Male                                                                 | 9              | 0.81 (0.76-0.87) | < 0.001  | 0.337               | 11.7      |                   |
| Female                                                               | 17             | 0.77 (0.73-0.81) | < 0.001  | 0.055               | 37.5      |                   |
| Both <sup>b</sup>                                                    | 8              | 0.70 (0.57-0.85) | < 0.001  | 0.067               | 45.3      |                   |
| <b>BMI (kg/m<sup>2</sup>)</b>                                        | 26             |                  |          |                     |           | 0.716             |
| ≥ 25                                                                 | 12             | 0.75 (0.69-0.81) | < 0.001  | 0.135               | 31        |                   |
| < 25                                                                 | 11             | 0.78 (0.74-0.83) | < 0.001  | 0.022               | 45.4      |                   |
| Unknown                                                              | 3              | 0.81 (0.76-0.86) | < 0.001  | 0.586               | 0         |                   |
| <b>Follow-up duration (y)</b>                                        | 26             |                  |          |                     |           | 0.150             |
| ≥ 10                                                                 | 12             | 0.80 (0.76-0.84) | < 0.001  | 0.047               | 38.8      |                   |
| < 10                                                                 | 14             | 0.74 (0.68-0.80) | < 0.001  | 0.164               | 25.2      |                   |
| <b>Dietary assessment</b>                                            | 26             |                  |          |                     |           | 0.281             |
| FFQ/validated FFQ                                                    | 15             | 0.77 (0.73-0.82) | < 0.001  | 0.159               | 23.7      |                   |
| SFFQ/validated SFFQ                                                  | 9              | 0.79 (0.74-0.84) | < 0.001  | 0.017               | 52.5      |                   |
| Other                                                                | 2              | 0.55 (0.36-0.83) | 0.005    | 0.826               | 0         |                   |
| <b>Magnesium intake type<sup>c</sup></b>                             | 28             |                  |          |                     |           | 0.335             |
| Total magnesium intake <sup>d</sup>                                  | 15             | 0.79 (0.75-0.84) | < 0.001  | 0.035               | 39.8      |                   |
| Dietary magnesium intake                                             | 13             | 0.77 (0.72-0.82) | < 0.001  | 0.166               | 25.0      |                   |
| <b>Total energy adjustment</b>                                       | 26             |                  |          |                     |           | 0.396             |
| Yes                                                                  | 17             | 0.79 (0.74-0.84) | < 0.001  | 0.027               | 40.4      |                   |
| No                                                                   | 9              | 0.76 (0.72-0.81) | < 0.001  | 0.225               | 21.6      |                   |
| <b>Difference between top and bottom intake (mg/day)<sup>e</sup></b> | 27             |                  |          |                     |           | 0.671             |
| ≥ 140                                                                | 13             | 0.78 (0.74-0.83) | < 0.001  | 0.020               | 45.3      |                   |
| < 140                                                                | 14             | 0.77 (0.72-0.82) | < 0.001  | 0.209               | 21.0      |                   |
| <b>Current CV events status<sup>f</sup></b>                          | 26             |                  |          |                     |           | 0.536             |
| Yes                                                                  | 13             | 0.79 (0.74-0.83) | < 0.001  | 0.049               | 37.9      |                   |
| Unknown                                                              | 13             | 0.77 (0.71-0.82) | < 0.001  | 0.082               | 35.1      |                   |
| <b>Hypercholesterolemia status<sup>g</sup></b>                       | 26             |                  |          |                     |           | 0.625             |
| Yes                                                                  | 5              | 0.79 (0.73-0.85) | < 0.001  | 0.021               | 57.5      |                   |
| Unknown                                                              | 21             | 0.77 (0.73-0.82) | < 0.001  | 0.096               | 27.3      |                   |
| <b>Family diabetes history</b>                                       | 26             |                  |          |                     |           | 0.168             |
| Yes                                                                  | 17             | 0.76 (0.72-0.80) | < 0.001  | 0.021               | 41.8      |                   |
| Unknown                                                              | 9              | 0.81 (0.76-0.87) | < 0.001  | 0.258               | 14.3      |                   |

770 **Abbreviation:** T2D, type 2 diabetes; BMI, body mass index; FFQ, food frequency questionnaire; SFFQ, semi-quantitative food  
771 frequent questionnaire; RR, relative risk; ES, effect size; CV events, cardiovascular events.

772 <sup>a</sup>, Male and female of T2D outcome were treated as independent cohorts within eight studies;

773 <sup>b</sup>, Male and female participants were in independent cohorts;

774 <sup>c</sup>, Two studies reported total magnesium and dietary magnesium intake outcome;

775 <sup>d</sup>, Total magnesium intake (milligrams per day) included the total amount of magnesium from both food (diet) and supplement;

776 <sup>e</sup>, Subtract the lowest category intake from the highest. Oba et al (M) was in < 140 group, while Oba et al (F) was in ≥ 140 group;

777 <sup>f</sup>, Grouped by whether participants with or without CV events. CV events in this part include coronary heart disease, heart failure,  
778 stroke, atrial fibrillation, and self-reported heart disease etc;

779 <sup>g</sup>, Grouped by whether participants with or without hypercholesterolemia. Hypercholesterolemia in this part means cholesterol  
780 concentration ≥ 240 mg/dL.

For peer review only

781 **Table 2.** Subgroup Analyses Relating to Magnesium Intake and Total Stroke, Ischemic Stroke, Hemorrhagic stroke.  
1

| Group                               | Total Stroke  |                     |                    |                          | Ischemic Stroke |                     |                    |                          | Hemorrhagic stroke |                  |                    |                          |
|-------------------------------------|---------------|---------------------|--------------------|--------------------------|-----------------|---------------------|--------------------|--------------------------|--------------------|------------------|--------------------|--------------------------|
|                                     | No.of studies | RR (95% CI)         | I <sup>2</sup> (%) | P <sub>interaction</sub> | No.of studies   | RR (95% CI)         | I <sup>2</sup> (%) | P <sub>interaction</sub> | No.of studies      | RR (95% CI)      | I <sup>2</sup> (%) | P <sub>interaction</sub> |
| Total                               | 15            | 0.89<br>(0.83-0.94) | 0.00               | NA                       | 12              | 0.88<br>(0.81-0.95) | 16.90              | NA                       | 8                  | 0.93 (0.82-1.06) | 0.461              | NA                       |
| <b>Participants region</b>          | 15            |                     |                    | 0.733                    | 12              |                     |                    | 0.584                    | 8                  |                  |                    | 0.873                    |
| North America                       | 6             | 0.87<br>(0.79-0.96) | 0.00               |                          | 5               | 0.85<br>(0.76-0.95) | 0.00               |                          | 4                  | 0.90 (0.71-1.15) | 0.00               |                          |
| Europe                              | 5             | 0.87<br>(0.77-0.98) | 14.80              |                          | 3               | 0.86<br>(0.78-0.95) | 0.00               |                          | 2                  | 0.99 (0.79-1.25) | 0.00               |                          |
| Asia                                | 4             | 0.90<br>(0.78-1.05) | 32.80              |                          | 4               | 0.93<br>(0.75-1.14) | 45.50              |                          | 2                  | 0.89 (0.66-1.21) | 53.40              |                          |
| Multiple nations                    | 0             | NA                  | NA                 |                          | 0               | NA                  | NA                 |                          | 0                  | NA               | NA                 |                          |
| <b>Sex<sup>a</sup></b>              | 18            |                     |                    | 0.031                    | 14              |                     |                    | 0.134                    | 10                 |                  |                    | 0.425                    |
| Male                                | 6             | 0.95(0.86-1.05)     | 0.00               |                          | 4               | 0.99<br>(0.82-1.19) | 52.80              |                          | 4                  | 0.97 (0.75-1.26) | 35.50              |                          |
| Female                              | 7             | 0.91<br>(0.83-0.99) | 0.00               |                          | 6               | 0.89<br>(0.79-1.00) | 0.00               |                          | 6                  | 0.88 (0.74-1.06) | 0.00               |                          |
| Both <sup>b</sup>                   | 5             | 0.74<br>(0.64-0.85) | 0.00               |                          | 4               | 0.76<br>(0.65-0.88) | 0.00               |                          | 0                  | NA               | NA                 |                          |
| <b>Mean BMI (kg/m<sup>2</sup>)</b>  | 15            |                     |                    | 0.606                    | 12              |                     |                    | 0.631                    | 8                  |                  |                    | 0.418                    |
| ≥ 25                                | 8             | 0.89<br>(0.82-0.96) | 0.00               |                          | 6               | 0.88<br>(0.81-0.96) | 0.00               |                          | 5                  | 0.97 (0.81-1.17) | 0.00               |                          |
| < 25                                | 5             | 0.89<br>(0.78-1.01) | 30.00              |                          | 5               | 0.87<br>(0.73-1.03) | 44.00              |                          | 3                  | 0.88 (0.69-1.12) | 39.30              |                          |
| Unknown                             | 2             | 0.80<br>(0.63-1.02) | 0.00               |                          | 1               | 0.76<br>(0.57-1.07) | NA                 |                          | 0                  | NA               | NA                 |                          |
| <b>Follow-up duration (y)</b>       | 15            |                     |                    | 0.798                    | 12              |                     |                    | 0.811                    | 8                  |                  |                    | 0.808                    |
| ≥ 12                                | 11            | 0.88<br>(0.82-0.94) | 5.30               |                          | 10              | 0.87<br>(0.80-0.95) | 19.10              |                          | 7                  | 0.93 (0.81-1.08) | 7.70               |                          |
| < 12                                | 4             | 0.90<br>(0.77-1.05) | 0.00               |                          | 2               | 0.86<br>(0.62-1.20) | 48.40              |                          | 1                  | 0.88 (0.57-1.36) | NA                 |                          |
| <b>Dietary assessment</b>           | 15            |                     |                    | 0.578                    | 12              |                     |                    | NA                       | 8                  |                  |                    | NA                       |
| FFQ/validated FFQ                   | 14            | 0.89<br>(0.83-0.95) | 3.80               |                          | 12              | 0.88<br>(0.81-0.95) | 16.90              |                          | 8                  | 0.93 (0.82-1.06) | 0.00               |                          |
| SFFQ/validated SFFQ                 | 0             | NA                  | NA                 |                          | 0               | NA                  | NA                 |                          | 0                  | NA               | NA                 |                          |
| Other                               | 1             | 0.81<br>(0.61-1.09) | 0.00               |                          | 0               | NA                  | NA                 |                          | 0                  | NA               | NA                 |                          |
| <b>Magnesium intake type</b>        | 15            |                     |                    | 0.865                    | 12              |                     |                    | 0.831                    | 8                  |                  |                    | 0.831                    |
| Total magnesium intake <sup>c</sup> | 8             | 0.89<br>(0.82-0.96) | 0.00               |                          | 6               | 0.87<br>(0.80-0.94) | 0.00               |                          | 5                  | 0.94 (0.79-1.12) | 0.00               |                          |
| Dietary magnesium                   |               | 0.88                | 0.44               |                          |                 | 0.89                | 35.40              |                          |                    | 0.91 (0.70-1.18) | 39.40              |                          |



|    |                                                                      |    |             |       |    |             |       |   |                  |       |
|----|----------------------------------------------------------------------|----|-------------|-------|----|-------------|-------|---|------------------|-------|
| 1  | intake                                                               | 7  | (0.81-0.96) |       | 6  | (0.77-1.03) |       | 3 |                  |       |
| 2  | <b>Total energy adjustment</b>                                       | 15 |             | 0.888 | 12 |             | 0.689 | 8 |                  | 0.538 |
| 3  |                                                                      |    | 0.87        |       |    | 0.86        |       |   |                  |       |
| 4  | Yes                                                                  | 5  | (0.77-0.99) | 27.00 | 2  | (0.78-0.94) | 0.00  | 2 | 0.93 (0.82-1.06) | 0.00  |
| 5  | No                                                                   | 10 | 0.89        | 0.00  | 10 | 0.88        | 26.60 | 6 | 0.90 (0.76-1.07) | 11.40 |
| 6  | <b>Difference between top and bottom intake (mg/day)<sup>d</sup></b> |    | (0.83-0.96) |       |    | (0.79-0.99) |       |   |                  |       |
| 7  |                                                                      | 15 |             | 0.107 | 12 |             | 0.180 | 8 |                  | 0.244 |
| 8  |                                                                      |    |             |       |    |             |       |   |                  |       |
| 9  | ≥ 180                                                                | 7  | 0.83        | 0.00  | 5  | 0.83        | 0.00  | 6 | 1.07 (0.83-1.37) | 0.00  |
| 10 |                                                                      |    | (0.76-0.91) |       |    | (0.76-0.91) |       |   |                  |       |
| 11 | < 180                                                                | 8  | 0.93        | 0.00  | 7  | 0.92        | 26.20 | 2 | 0.89 (0.76-1.03) | 0.00  |
| 12 |                                                                      |    | (0.86-1.00) |       |    | (0.81-1.03) |       |   |                  |       |
| 13 | <b>Current CV events status<sup>e</sup></b>                          |    |             | 0.074 | 12 |             | 0.393 | 8 |                  | NA    |
| 14 | Yes                                                                  | 12 | 0.90        | 0.00  | 11 | 0.88        | 18.20 | 8 | 0.93 (0.82-1.06) | 0.00  |
| 15 |                                                                      |    | (0.85-0.96) |       |    | (0.81-0.96) |       |   |                  |       |
| 16 | Unknown                                                              | 3  | 0.75        | 0.00  | 1  | 0.76        | NA    | 0 | NA               | NA    |
| 17 |                                                                      |    | (0.63-0.90) |       |    | (0.57-1.01) |       |   |                  |       |
| 18 | <b>Hypercholesterolemia status<sup>f</sup></b>                       |    |             | 0.480 | 12 |             | 0.565 | 8 |                  | 0.651 |
| 19 | Yes                                                                  | 7  | 0.91        | 0.00  | 6  | 0.90        | 6.90  | 5 | 0.90 (0.76-1.08) | 0.00  |
| 20 |                                                                      |    | (0.83-0.99) |       |    | (0.80-1.01) |       |   |                  |       |
| 21 | Unknown                                                              | 8  | 0.86        | 13.10 | 6  | 0.86        | 32.40 | 3 | 0.94 (0.72-1.22) | 40.30 |
| 22 |                                                                      |    | (0.79-0.95) |       |    | (0.77-0.97) |       |   |                  |       |
| 23 | <b>Current diabetes status<sup>g</sup></b>                           |    |             | 0.039 | 12 |             | 0.159 | 8 |                  | NA    |
| 24 | Yes                                                                  | 10 | 0.91        | 0.00  | 10 | 0.89        | 13.50 | 8 | 0.93 (0.82-1.06) | 0.00  |
| 25 |                                                                      |    | (0.82-0.97) |       |    | (0.82-0.97) |       |   |                  |       |
| 26 | Unknown                                                              | 5  | 0.75        | 0.00  | 2  | 0.72        | 0.00  | 0 | NA               | NA    |
| 27 |                                                                      |    | (0.64-0.88) |       |    | (0.56-0.92) |       |   |                  |       |

**Abbreviation:** BMI, body mass index; FFQ, food frequency questionnaire; SFFQ, semi-quantitative food frequency questionnaire; CV events, cardiovascular events; RR, relative risk; NA, not available.

<sup>a</sup>, several studies reported stroke outcome of male and female participants in different cohorts;

<sup>b</sup>, male and female participants were in the same cohort;

<sup>c</sup>, total magnesium intake (milligrams per day) included the total amount of magnesium from both food (diet) and supplements;

<sup>d</sup>, subtract the lowest category intake from the highest;

<sup>e</sup>, grouped by whether participants with or without CV events. CV events in this part include coronary heart disease, heart failure, atrial fibrillation, and self-reported heart disease etc., stroke is not included;

<sup>f</sup>, grouped by whether participants with or without hypercholesterolemia. Hypercholesterolemia in this part means cholesterol concentration ≥ 240 mg/dL;

<sup>g</sup>, grouped by whether participants with or without diabetes.

1  
2  
3 783 **Figure Legends**  
4

5 784 **Figure 1.** Flow Chart for the Literature Search and Screening Process  
6

7 785 **Figure 2.** Forest Plots for the Risk of Type 2 Diabetes (T2D) for Magnesium Intake  
8 (A) and for < 50 mg/day (B),  $\geq 50$  and < 100 mg/day (C),  $\geq 100$  and <150 mg/day (D)  
9  
10 786  
11  
12 787 and  $\geq 150$  mg/day Increments (E).  
13

14 788 **Figure 3.** Two-Stage Dose-Response Effect on the Relationships between Magnesium  
15 Intake and Type 2 Diabetes (T2D) (A), Total Stroke (B), Ischemic Stroke (C) and  
16  
17 789 Hemorrhagic Stroke (D).  
18  
19  
20  
21  
22  
23  
24  
25  
26  
27  
28  
29  
30  
31  
32  
33  
34  
35  
36  
37  
38  
39  
40  
41  
42  
43  
44  
45  
46  
47  
48  
49  
50  
51  
52  
53  
54  
55  
56  
57  
58  
59  
60

1  
2  
3 791 **Supplementary material online:**  
4

5 792 **Table S1.** PRISMA 2009 Checklist  
6

7 793 **Table S2.** MOOSE Checklist  
8

9 794 **Table S3.** Complete Search Terms for PubMed  
10

11 795 **Table S4.** Summary of Baseline Characteristics of the Included Studies  
12

13 796 **Table S5.** Methodological Quality Assessments of the Included Studies with  
14  
15  
16  
17 797 Newcastle-Ottawa Scales

18 798 **Figure S1.** Funnel Plots for Magnesium Intake and Type 2 Diabetes (A), Ischemic  
19  
20  
21 799 Stroke (B) and Hemorrhagic Stroke (C).  
22

23 800 **Figure S2.** Forest Plots for the Risk of Total Stroke for Magnesium Intake (A) and for  
24  
25  
26 801 < 50 mg/day (B),  $\geq 50$  and < 100 mg/day (C),  $\geq 100$  and <150 mg/day (D) and  $\geq 150$   
27  
28 802 mg/day Increments (E).  
29

30 803 **Figure S3.** Forest Plots for the Risk of Ischemic Stroke for Magnesium Intake (A) and  
31  
32  
33 804 for < 50 mg/day (B),  $\geq 50$  and < 100 mg/day (C),  $\geq 100$  and <150 mg/day (D) and  $\geq$   
34  
35 805 150 mg/day Increments (E).  
36

37 806 **Figure S4.** Forest Plots for the Risk of Hemorrhagic Stroke for Magnesium Intake (A)  
38  
39  
40 807 and for < 50 mg/day (B),  $\geq 50$  and < 100 mg/day (C),  $\geq 100$  and <150 mg/day (D) and  
41  
42 808  $\geq 150$  mg/day Increments (E).  
43

44 809 **Figure S5.** Forest Plots for the Risk of Subarachnoid Hemorrhage for Magnesium  
45  
46  
47 810 Intake (A) and for < 50 mg/day (B),  $\geq 50$  and < 100 mg/day (C),  $\geq 100$  and <150  
48  
49 811 mg/day (D) and  $\geq 150$  mg/day Increments (E)  
50

51 812 **Figure S6.** Forest Plots for the Risk of Intracerebral Hemorrhage for Magnesium  
52  
53  
54 813 Intake (A) and for < 50 mg/day (B),  $\geq 50$  and < 100 mg/day (C),  $\geq 100$  and <150  
55  
56 814 mg/day (D) and  $\geq 150$  mg/day Increments (E)  
57

58 815 **Figure S7.** Meta-Regression of the Relative Risk for Type 2 Diabetes According to  
59  
60

1  
2  
3 816 Body Mass Index (A,  $P = 0.716$ ), Sex (B,  $P = 0.284$ ), Participant Region (C,  $P =$   
4  
5 817 0.904) and Dietary Assessment (D,  $P = 0.521$ ).

7  
8 818 **Figure S8.** Meta-Regression of the Relative Risk for Total Stroke According to Body  
9  
10 819 Mass Index (A,  $P = 0.606$ ), Sex (B,  $P = 0.112$ ), Participant region (C,  $P = 0.891$ ) and  
11  
12 820 Dietary Assessment (D,  $P = 0.891$ ).

14  
15 821 **Figure S9.** Meta-Regression of the Relative Risk for Ischemic Stroke According to  
16  
17 822 Body Mass Index (A,  $P = 0.631$ ), Sex (B,  $P = 0.134$ ), Participant Region (C,  $P =$   
18  
19 823 0.584) and Dietary Assessment (D, no regression  $P$ -value due to limited data).

21  
22 824 **Figure S10.** Meta-Regression of the Relative Risk for Hemorrhagic Stroke According  
23  
24 825 to Body Mass Index (A,  $P = 0.418$ ), Sex (B,  $P = 0.872$ ), Participant Region (C,  $P =$   
25  
26 826 0.872) and Dietary Assessment (D, no regression  $P$ -value due to limited data).

28  
29 827 **Figure S11.** Cumulative Meta-Analysis Related to Magnesium Intake and Type 2  
30  
31 828 Diabetes (T2D)

33  
34 829 **Figure S12.** Cumulative Meta-Analysis Related to Magnesium Intake and Total  
35  
36 830 Stroke

37  
38 831 **Figure S13.** Cumulative Meta-Analysis Related to Magnesium Intake and Ischemic  
39  
40 832 Stroke

42  
43 833 **Figure S14.** Cumulative Meta-Analysis Related to Magnesium Intake and  
44  
45 834 Hemorrhagic Stroke

46  
47 835 **Figure S15.** Dose-Response Effect on the Relationships between Magnesium Intake  
48  
49 836 and Subarachnoid Hemorrhage (A) and Intracerebral Hemorrhage (B).

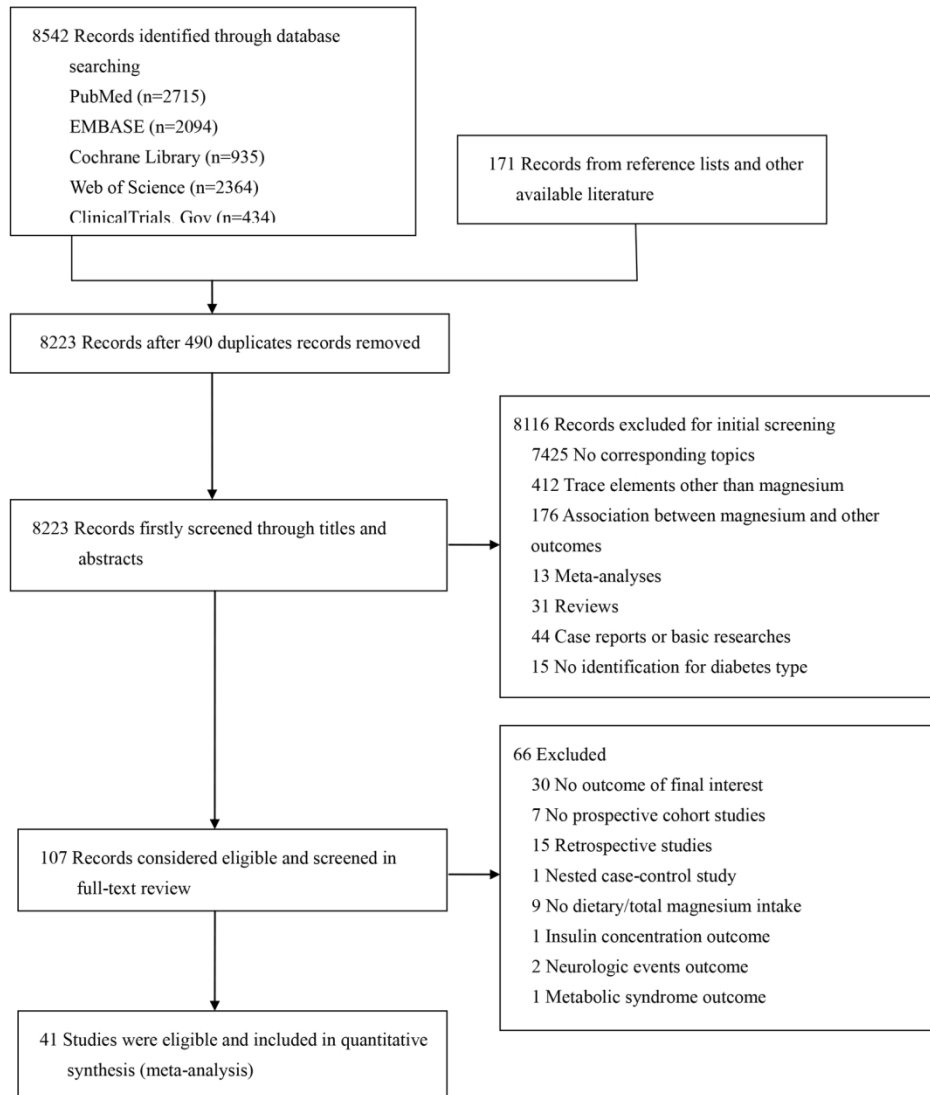

Figure 1. Flow Chart for the Literature Search and Screening Process



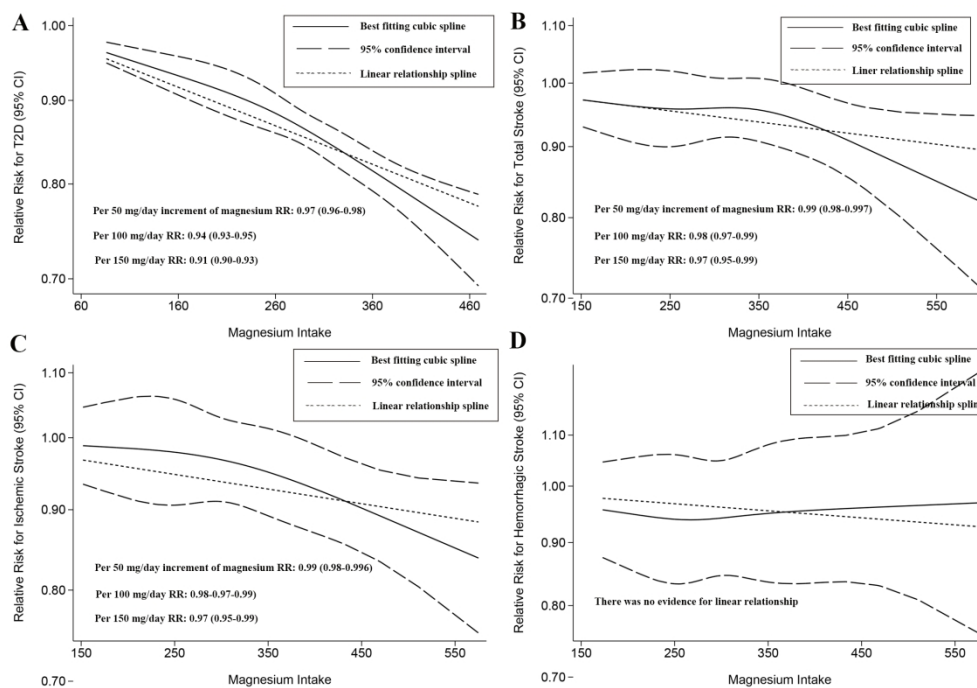

Figure 3. Two-Stage Dose-Response Effect on the Relationships between Magnesium Intake and Type 2 Diabetes (T2D) (A), Total Stroke (B), Ischemic Stroke (C) and Hemorrhagic Stroke (D).



Table S1 PRISMA 2009 Checklist

| Section/topic                      | #  | Checklist item                                                                                                                                                                                                                                                                                              | Reported on page # |
|------------------------------------|----|-------------------------------------------------------------------------------------------------------------------------------------------------------------------------------------------------------------------------------------------------------------------------------------------------------------|--------------------|
| <b>TITLE</b>                       |    |                                                                                                                                                                                                                                                                                                             | <b>1</b>           |
| Title                              | 1  | Identify the report as a systematic review, meta-analysis, or both.                                                                                                                                                                                                                                         | 1                  |
| <b>ABSTRACT</b>                    |    |                                                                                                                                                                                                                                                                                                             | <b>2-3</b>         |
| Structured summary                 | 2  | Provide a structured summary including, as applicable: background; objectives; data sources; study eligibility criteria, participants, and interventions; study appraisal and synthesis methods; results; limitations; conclusions and implications of key findings; systematic review registration number. | 2-3                |
| <b>INTRODUCTION</b>                |    |                                                                                                                                                                                                                                                                                                             | <b>4-5</b>         |
| Rationale                          | 3  | Describe the rationale for the review in the context of what is already known.                                                                                                                                                                                                                              | 4                  |
| Objectives                         | 4  | Provide an explicit statement of questions being addressed with reference to participants, interventions, comparisons, outcomes, and study design (PICOS).                                                                                                                                                  | 4-5                |
| <b>METHODS</b>                     |    |                                                                                                                                                                                                                                                                                                             | <b>5-9</b>         |
| Protocol and registration          | 5  | Indicate if a review protocol exists, if and where it can be accessed (e.g., Web address), and, if available, provide registration information including registration number.                                                                                                                               | 5                  |
| Eligibility criteria               | 6  | Specify study characteristics (e.g., PICOS, length of follow-up) and report characteristics (e.g., years considered, language, publication status) used as criteria for eligibility, giving rationale.                                                                                                      | 5-6                |
| Information sources                | 7  | Describe all information sources (e.g., databases with dates of coverage, contact with study authors to identify additional studies) in the search and date last searched.                                                                                                                                  | 5-6                |
| Search                             | 8  | Present full electronic search strategy for at least one database, including any limits used, such that it could be repeated.                                                                                                                                                                               | 5-6                |
| Study selection                    | 9  | State the process for selecting studies (i.e., screening, eligibility, included in systematic review, and, if applicable, included in the meta-analysis).                                                                                                                                                   | 5-6                |
| Data collection process            | 10 | Describe method of data extraction from reports (e.g., piloted forms, independently, in duplicate) and any processes for obtaining and confirming data from investigators.                                                                                                                                  | 6                  |
| Data items                         | 11 | List and define all variables for which data were sought (e.g., PICOS, funding sources) and any assumptions and simplifications made.                                                                                                                                                                       | 6                  |
| Risk of bias in individual studies | 12 | Describe methods used for assessing risk of bias of individual studies (including specification of whether this was done at the study or outcome level), and how this information is to be used in any data synthesis.                                                                                      | 6                  |
| Summary measures                   | 13 | State the principal summary measures (e.g., risk ratio, difference in means).                                                                                                                                                                                                                               | 6                  |
| Synthesis of results               | 14 | Describe the methods of handling data and combining results of studies, if done, including measures of consistency (e.g., $I^2$ ) for each meta-analysis.                                                                                                                                                   | 6-10               |



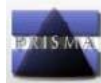

# Table S1 PRISMA 2009 Checklist

Page 1 of 2

| Section/topic                 | #  | Checklist item                                                                                                                                                                                           | Reported on page # |
|-------------------------------|----|----------------------------------------------------------------------------------------------------------------------------------------------------------------------------------------------------------|--------------------|
| Risk of bias across studies   | 15 | Specify any assessment of risk of bias that may affect the cumulative evidence (e.g., publication bias, selective reporting within studies).                                                             | 7                  |
| Additional analyses           | 16 | Describe methods of additional analyses (e.g., sensitivity or subgroup analyses, meta-regression), if done, indicating which were pre-specified.                                                         | 8-9                |
| <b>RESULTS</b>                |    |                                                                                                                                                                                                          | <b>9-16</b>        |
| Study selection               | 17 | Give numbers of studies screened, assessed for eligibility, and included in the review, with reasons for exclusions at each stage, ideally with a flow diagram.                                          | 9                  |
| Study characteristics         | 18 | For each study, present characteristics for which data were extracted (e.g., study size, PICOS, follow-up period) and provide the citations.                                                             | 9-10               |
| Risk of bias within studies   | 19 | Present data on risk of bias of each study and, if available, any outcome level assessment (see item 12).                                                                                                | 9-10               |
| Results of individual studies | 20 | For all outcomes considered (benefits or harms), present, for each study: (a) simple summary data for each intervention group (b) effect estimates and confidence intervals, ideally with a forest plot. | 10-16              |
| Synthesis of results          | 21 | Present results of each meta-analysis done, including confidence intervals and measures of consistency.                                                                                                  | 10-16              |
| Risk of bias across studies   | 22 | Present results of any assessment of risk of bias across studies (see Item 15).                                                                                                                          | 10-16              |
| Additional analysis           | 23 | Give results of additional analyses, if done (e.g., sensitivity or subgroup analyses, meta-regression [see Item 16]).                                                                                    | 10-16              |
| <b>DISCUSSION</b>             |    |                                                                                                                                                                                                          | <b>16-22</b>       |
| Summary of evidence           | 24 | Summarize the main findings including the strength of evidence for each main outcome; consider their relevance to key groups (e.g., healthcare providers, users, and policy makers).                     | 16-22              |
| Limitations                   | 25 | Discuss limitations at study and outcome level (e.g., risk of bias), and at review-level (e.g., incomplete retrieval of identified research, reporting bias).                                            | 21-22              |
| Conclusions                   | 26 | Provide a general interpretation of the results in the context of other evidence, and implications for future research.                                                                                  | 22                 |
| <b>FUNDING</b>                |    |                                                                                                                                                                                                          | <b>23</b>          |
| Funding                       | 27 | Describe sources of funding for the systematic review and other support (e.g., supply of data); role of funders for the systematic review.                                                               | 23                 |

From: Moher D, Liberati A, Tetzlaff J, Altman DG, The PRISMA Group (2009). Preferred Reporting Items for Systematic Reviews and Meta-Analyses: The PRISMA Statement. PLoS Med 6(7): e1000097. doi:10.1371/journal.pmed1000097

For more information, visit: [www.prisma-statement.org](http://www.prisma-statement.org).

Page 2 of 2

For peer review only - <http://bmjopen.bmj.com/site/about/guidelines.xhtml>

**Table S2. MOOSE Checklist****MOOSE Checklist for Meta-analyses of Observational Studies**

| Item No                                     | Recommendation                                                                                                                             | Reported on Page No |
|---------------------------------------------|--------------------------------------------------------------------------------------------------------------------------------------------|---------------------|
| Reporting of background should include      |                                                                                                                                            |                     |
| 1                                           | Problem definition                                                                                                                         | 4                   |
| 2                                           | Hypothesis statement                                                                                                                       | 4                   |
| 3                                           | Description of study outcome(s)                                                                                                            | 5                   |
| 4                                           | Type of exposure or intervention used                                                                                                      | 5                   |
| 5                                           | Type of study designs used                                                                                                                 | 5                   |
| 6                                           | Study population                                                                                                                           | 4-5                 |
| Reporting of search strategy should include |                                                                                                                                            |                     |
| 7                                           | Qualifications of searchers (eg, librarians and investigators)                                                                             | 6-7                 |
| 8                                           | Search strategy, including time period included in the synthesis and key words                                                             | 5-6                 |
| 9                                           | Effort to include all available studies, including contact with authors                                                                    | 5-6                 |
| 10                                          | Databases and registries searched                                                                                                          | 5-6                 |
| 11                                          | Search software used, name and version, including special features used (eg, explosion)                                                    | 5-6                 |
| 12                                          | Use of hand searching (eg, reference lists of obtained articles)                                                                           | 5-6                 |
| 13                                          | List of citations located and those excluded, including justification                                                                      | 6                   |
| 14                                          | Method of addressing articles published in languages other than English                                                                    | 6                   |
| 15                                          | Method of handling abstracts and unpublished studies                                                                                       | 6                   |
| 16                                          | Description of any contact with authors                                                                                                    | 6                   |
| Reporting of methods should include         |                                                                                                                                            |                     |
| 17                                          | Description of relevance or appropriateness of studies assembled for assessing the hypothesis to be tested                                 | 7-8                 |
| 18                                          | Rationale for the selection and coding of data (eg, sound clinical principles or convenience)                                              | 6-7                 |
| 19                                          | Documentation of how data were classified and coded (eg, multiple raters, blinding and interrater reliability)                             | 6-7                 |
| 20                                          | Assessment of confounding (eg, comparability of cases and controls in studies where appropriate)                                           | 7-9                 |
| 21                                          | Assessment of study quality, including blinding of quality assessors, stratification or regression on possible predictors of study results | 7-9                 |
| 22                                          | Assessment of heterogeneity                                                                                                                | 7-9                 |
| 23                                          | Description of statistical methods (eg, complete description of fixed                                                                      | 7-9                 |

|                                     |                                                                                                                                                                                                        |                    |
|-------------------------------------|--------------------------------------------------------------------------------------------------------------------------------------------------------------------------------------------------------|--------------------|
|                                     | or random effects models, justification of whether the chosen models account for predictors of study results, dose-response models, or cumulative meta-analysis) in sufficient detail to be replicated |                    |
| 24                                  | Provision of appropriate tables and graphics                                                                                                                                                           | 9                  |
| Reporting of results should include |                                                                                                                                                                                                        |                    |
| 25                                  | Graphic summarizing individual study estimates and overall estimate                                                                                                                                    | 10-14              |
| 26                                  | Table giving descriptive information for each study included                                                                                                                                           | 10-11,<br>Table S4 |
| 27                                  | Results of sensitivity testing (eg, subgroup analysis)                                                                                                                                                 | 14                 |
| 28                                  | Indication of statistical uncertainty of findings                                                                                                                                                      | 16                 |

| Item No                                 | Recommendation                                                                                                            | Reported on Page No |
|-----------------------------------------|---------------------------------------------------------------------------------------------------------------------------|---------------------|
| Reporting of discussion should include  |                                                                                                                           |                     |
| 29                                      | Quantitative assessment of bias (eg, publication bias)                                                                    | 11-14               |
| 30                                      | Justification for exclusion (eg, exclusion of non-English language citations)                                             | 10                  |
| 31                                      | Assessment of quality of included studies                                                                                 | 11, Table S5        |
| Reporting of conclusions should include |                                                                                                                           |                     |
| 32                                      | Consideration of alternative explanations for observed results                                                            | 16-22               |
| 33                                      | Generalization of the conclusions (ie, appropriate for the data presented and within the domain of the literature review) | 16, 23              |
| 34                                      | Guidelines for future research                                                                                            | 17-20, 22           |
| 35                                      | Disclosure of funding source                                                                                              | None                |

**Table S3.** Complete Search Terms for PubMed**A search example for Pubmed**

The combined text and medical subject heading (MeSH) terms used were: “Magnesium” and “Magnesium Supplementation” “Diabetes Mellitus, Type 2”, “Stroke”, “Cerebrovascular Stroke”, and “Cohort Studies”. The complete search terms for PubMed included: (Magnesium [MeSH terms]) AND (Magnesium Supplementation [MeSH terms]) AND (Diabetes Mellitus, Type 2 [MeSH term] OR Diabetes Mellitus, Noninsulin-Dependent [Text Word] OR Diabetes Mellitus, Ketosis-Resistant [Text Word] OR Diabetes Mellitus, Non-Insulin-Dependent [Text Word] OR Non-Insulin-Dependent Diabetes Mellitus [Text Word] OR Diabetes Mellitus, Stable [Text Word] OR NIDDM [Text Word] OR Maturity-Onset Diabetes Mellitus [Text Word] OR Diabetes Mellitus, Slow-Onset [Text Word] OR Type 2 Diabetes [Text Word] OR Diabetes Mellitus, Adult-Onset [Text Word]) AND (Stroke [MeSH terms] OR Cerebrovascular Stroke [Text Word] OR Cerebrovascular Accident [Text Word] OR CVA (Cerebrovascular Accident) [Text Word] OR Vascular Accident, Brain [Text Word] OR Cerebrovascular Apoplexy [Text Word] OR Cerebral Stroke [Text Word] OR Stroke, Acute [Text Word] OR Cerebrovascular Accident, Acute [Text Word] OR Acute Cerebrovascular Accident [Text Word] OR Apoplexy, Cerebrovascular [Text Word]) AND (Cohort Studies [MeSH term] OR Cohort Study [Text Word] OR Studies, Cohort [Text Word] OR Study, Cohort [Text Word] OR Concurrent Studies [Text Word] OR Studies, Concurrent [Text Word] OR Closed Cohort Studies [Text Word] OR Closed Cohort Study [Text Word] OR Study, Closed Cohort [Text Word] OR Cohort Analysis [Text Word] OR Cohort Analysis [Text Word] OR Prospective Studies [Text Word] OR Prospective Study [Text Word] OR Studies, Prospective [Text Word])

**Table S4.** Summary of Baseline Characteristics of the Included Studies

| Source                         | Nation   | Period                       | Population               | BMI          | Dietary Assessment | Case Ascertainment                               | Case (Cohort size)                             | Magnesium intake (mg/day)<br>highest VS. the lowest<br>[Adjusted RR (95% CI)] |
|--------------------------------|----------|------------------------------|--------------------------|--------------|--------------------|--------------------------------------------------|------------------------------------------------|-------------------------------------------------------------------------------|
| Salmeron 1997 <sup>11</sup>    | USA      | 1986-1992                    | M; 40-75 y               | 25.5         | validated SFFQ     | self-reported questionnaire                      | 523 T2D (42759)                                | 461 VS. 262 (0.72 (0.54-0.96))                                                |
| Salmeron 1997(2) <sup>12</sup> | USA      | 1986-1992                    | F; 40-65 y               | 25.1         | validated SFFQ     | self-reported questionnaire                      | 915 T2D (65173)                                | 338 VS. 222 (0.62 (0.50-0.78))                                                |
| Ascherio 1998 <sup>13</sup>    | USA      | 1986-1994                    | M; 40-75 y               | NA           | validated FFQ      | self-reported questionnaire                      | 328 stroke (43738)                             | 425 VS. 243 (0.92 (0.58-1.46))                                                |
| Iso 1999 <sup>14</sup>         | USA      | 1980-1994                    | F; 34-59 y               | 22.7         | FFQ                | self-reported questionnaire                      | 690 stroke (85764)                             | 381 VS. 211 (0.80 (0.63-1.01))                                                |
| Kao 1999 <sup>15</sup>         | USA      | NA                           | M/F; 45-64 y             | 27.2         | FFQ                | self-reported questionnaire                      | black: 367 T2D (2622)<br>white: 739 T2D (9506) | 374 VS. 264 (0.95 (0.52-1.74))<br>418 VS. 308 (0.80 (0.56-1.14))              |
| Liu 2000 <sup>16</sup>         | USA      | 1976-1984                    | F; 38-63 y               | 24.8         | validated FFQ      | self-reported questionnaire                      | 1879 T2D (75521)                               | 342 VS. 248 (0.75 (0.63-0.89))                                                |
| Meyer 2000 <sup>17</sup>       | USA      | 1986-1992                    | F; 55-69 y               | 26.8         | validated FFQ      | self-reported questionnaire                      | 1141 T2D (35998)                               | 362 VS. 220 (0.67 (0.55-0.82))                                                |
| Hodge 2004 <sup>18a</sup>      | multiple | 1990-1994                    | M/F; 45-64 y             | 26.1         | validated FFQ      | self-reported questionnaire                      | 365 T2D (31641)                                | 500 increment per day                                                         |
| Lopez 2004 <sup>19</sup>       | USA      | M: 1986-1998<br>W: 1980-1998 | M; 40-75 y<br>F; 30-35 y | 25.4<br>24.3 | validated SFFQ     | self-reported questionnaire                      | 1333 T2D (42872)<br>4085 T2D (85060)           | 457 VS. 314 (0.72 (0.58-0.89))<br>373 VS. 222 (0.73 (0.65-0.82))              |
| Song 2004 <sup>20</sup>        | USA      | 1993-2001                    | F; ≥45 y <sup>c</sup>    | 26           | SFFQ               | self-reported questionnaire                      | 918 T2D (38025)                                | 433 VS. 255 (0.89 (0.71-1.10))                                                |
| Song 2005 <sup>21</sup>        | USA      | 1993-2003                    | F; 39-89 y               | 26           | FFQ                | follow-up examination                            | 368 stroke (39876)                             | 433 VS. 255 (0.90 (0.65-1.26))                                                |
| Liu 2006 <sup>22</sup>         | USA      | 1996-2006                    | F; 47-63 y               | 25.8         | validated SFFQ     | self-reported questionnaire                      | 1603 T2D (37183)                               | 340 VS. 307 (0.80 (0.67-0.95))                                                |
| Pereira 2006 <sup>23</sup>     | USA      | 1986-1997                    | F; 56-66 y               | 26.7         | validated FFQ      | self-reported questionnaire                      | 1418 T2D (28812)                               | 334 VS. 281 (0.78(0.61-1.01))                                                 |
| Pittas 2006 <sup>24</sup>      | USA      | 1980-2000                    | F; 30-55 y               | 24.1         | validated SFFQ     | self-reported questionnaire                      | 4843 T2D (83779)                               | 352 VS. 258 (0.74 (0.67-0.82))                                                |
| Van 2006 <sup>25</sup>         | multiple | 1995-2003                    | F; 21-69 y               | 27.6         | validated FFQ      | self-reported questionnaire                      | 1964 T2D (41186)                               | 244 VS. 115 (0.65 (0.54-0.78))                                                |
| Schulze 2007 <sup>26</sup>     | multiple | 1994-2005                    | M/F; 35-65 y             | 26.1         | validated SFFQ     | self-reported questionnaire                      | 844 T2D (25067)                                | 377 VS. 268 (0.99 (0.78-1.26))                                                |
| Larsson 2008 <sup>27</sup>     | Sweden   | 1985-2004                    | M; 50-69 y               | 26.4         | validated FFQ      | follow-up examination                            | 3370 stroke (26556)                            | 575 VS. 382 (0.91 (0.77-1.07))                                                |
| Weng 2008 <sup>28</sup>        | Taipei   | 1989-2002                    | M/F; ≥40 y               | 24.5         | validated FFQ      | Self-reported and<br>cross-checked questionnaire | 132 ischemic stroke (1772)                     | 423 VS. 162 (0.69 (0.45-1.06))                                                |
| Kirii 2009 <sup>29</sup>       | Japan    | 1993-1998                    | M; 40-69 y<br>F; 40-69 y | 23.6<br>23.5 | FFQ                | self-reported questionnaire                      | 634 T2D (25876)<br>480 T2D (33919)             | 331 VS. 245 (0.93 (0.71-1.22))<br>314 VS. 248 (0.76 (0.56-1.03))              |
| Ohira 2009 <sup>30</sup>       | USA      | 1987-2004                    | M/F; 45-64 y             | 27.4         | validated FFQ      | follow-up examination                            | 577 ischemic stroke (14221)                    | 362 VS. 152 (0.80 (0.75-1.13))                                                |
| Villegas 2009 <sup>31</sup>    | China    | 2000-2006                    | F; 40-70 y               | 23.8         | validated FFQ      | follow-up examination                            | 2273 T2D (64191)                               | 318 VS. 214 (0.80 (0.68-0.93))                                                |
| Hopping 2010 <sup>32</sup>     | multiple | 1993-2007                    | M; 45-75 y<br>F; 45-75 y | NA           | validated FFQ      | self-reported questionnaire                      | 4555 T2D (36256)<br>4032 T2D (39256)           | 278 VS. 86 (0.77 (0.70-0.85))<br>300 VS. 93 (0.84 (0.76-0.93))                |
| Kim 2010 <sup>33</sup>         | USA      | 1985-2005                    | M/F; 18-30 y             | 24.5         | validated DHQ      | self-reported questionnaire                      | 330 T2D (4497)                                 | 302 VS. 182 (0.53 (0.32-0.86))                                                |

|    |                                 |            |            |                |      |                    |                                                       |                             |                                |
|----|---------------------------------|------------|------------|----------------|------|--------------------|-------------------------------------------------------|-----------------------------|--------------------------------|
| 1  | Kirii 2010 <sup>34</sup>        | Japan      | NA         | M/F; 40-65 y   | 22.9 | validated FFQ      | self-reported questionnaire                           | 459 T2D (17592)             | 303 VS. 158 (0.64 (0.44-0.94)) |
| 2  | Nanri 2010 <sup>35</sup>        | Japan      | 1990-1995  | M; 40-65 y     | NA   | validated FFQ      | self-reported questionnaire                           | 634 T2D (25872)             | 348 VS. 213 (0.86 (0.63-1.16)) |
| 3  |                                 |            |            | F; 40-65 y     |      |                    |                                                       | 480 T2D (33919)             | 333 VS. 213 (0.92 (0.66-1.28)) |
| 4  | Larsson 2011 <sup>36</sup>      | Sweden     | 1998-2008  | F; 49-83 y     | 25   | validated FFQ      | follow-up examination                                 | 1680 stroke (34670)         | 373 VS. 297 (1.02 (0.82-1.27)) |
| 5  | Weng 2012 <sup>37</sup>         | Taipei     | 1993-2002  | M/F; ≥30 y     | 24   | validated FFQ      | follow-up examination or self-reported questionnaire  | 141 T2D (1604)              | 406 VS. 212 (0.44 (0.25-0.75)) |
| 6  |                                 |            |            | M; 40-79 y     |      |                    |                                                       | 22.7                        | 634 stroke (23083)             |
| 7  | Zhang 2012 <sup>38</sup>        | Japan      | 1988-2006/ | F; 40-79 y     | 22.9 | validated FFQ      | follow-up examination                                 | 620 stroke (35533)          | 274 VS. 175 (0.90 (0.69-1.16)) |
| 8  |                                 |            |            | M/F; 40-79 y   |      |                    |                                                       | 22.9                        | 417 T2D (1999)                 |
| 9  | Hata 2013 <sup>39</sup>         | Japan      | 1988-2009  | M/F; 40-79 y   | 22.9 | validated SFFQ     | self-reported questionnaire                           | 417 T2D (1999)              | 215 VS. 133 (0.63 (0.44-0.90)) |
| 10 | Lin 2013 <sup>40</sup>          | Taipei     | 1989-2002  | M/F; ≥ 18 y    | 23.3 | validated FFQ      | follow-up examination and self-reported questionnaire | 123 stroke (2061)           | 378 VS. 210 (0.62 (0.40-0.97)) |
| 11 |                                 |            |            | M; 40-69 y     |      |                    |                                                       | 23.6                        | 690 T2D (27769)                |
| 12 | Oba 2013 <sup>41</sup>          | Japan      | 1990-2000  | F; 40-69 y     | 23.5 | validated FFQ      | self-reported questionnaire                           | 500 T2D (36864)             | 356 VS. 211 (0.69 (0.54-0.88)) |
| 13 |                                 |            |            | M/F; 21-70 y   |      |                    |                                                       | NA                          | FFQ                            |
| 14 | Sluijs 2013 <sup>42</sup>       | Netherland | NA         | M/F; 21-70 y   | NA   | FFQ                | NA                                                    | 361 ischemic stroke (36359) | 435 VS. 253 (0.76 (0.57-1.01)) |
| 15 | Hruby 2014 <sup>43</sup>        | USA        | 1995-2001  | M/F; 26-81 y   | 27   | validated FFQ      | self-reported questionnaire                           | 179 T2D (2582)              | 395 VS. 235 (0.49 (0.27-0.88)) |
| 16 | Sluijs 2014 <sup>44</sup>       | Netherland | NA         | M/F; 21-70 y   | NA   | FFQ                | follow-up examination                                 | 631 stroke (36094)          | 597 VS. 190 (0.64 (0.44-0.94)) |
| 17 | Adebamowo 2015 <sup>45</sup>    | USA        | 1986-2010  | M; 40-75 y     | 25.4 | validated FFQ      | self-reported questionnaire                           | 1547 stroke (42669)         | 467 VS. 267 (0.89 (0.71-1.11)) |
| 18 |                                 |            |            | F; 30-55 y     |      |                    |                                                       | 26.4                        | 3237 stroke (86149)            |
| 19 | Adebamowo 2015(2) <sup>46</sup> | USA        | 1976-2006  | F; 25-42 y     | 25.7 | validated FFQ      | self-reported questionnaire                           | 543 stroke (94715)          | 411 VS. 233 (0.93 (0.79-1.08)) |
| 20 |                                 |            |            | M; 40-75 y     |      |                    |                                                       | 26.5                        | 364 stroke (2000)              |
| 21 | Bain 2015 <sup>47</sup>         | Britain    | 2002-2008  | F; 40-75 y     | 26.2 | 7-day diary recall | follow-up examination                                 | 511 stroke (2445)           | 374 VS. 456 (0.82 (0.54-1.24)) |
| 22 |                                 |            |            | M/F; ≥65 y     |      |                    |                                                       | NA                          | 24 h dietary recall and SFFQ   |
| 23 | Huang 2015 <sup>48</sup>        | Taipei     | 2000-2008  | F; 30-55 y     | 24.8 |                    |                                                       | 7620 T2D (69176)            | 390 VS. 229 (0.80 (0.73-0.88)) |
| 24 |                                 |            |            | M; mean 53.5 y |      |                    |                                                       | 24.8                        | 3430 T2D (42096)               |
| 25 | Hruby 2017 <sup>49</sup>        | USA        | 1991-2013  | F; 25-42 y     | 24.6 | validated SFFQ     | self-reported questionnaire                           | 6080 T2D (91471)            | 424 VS. 249 (0.89 (0.81-0.99)) |
| 26 |                                 |            |            | M; 40-69 y     |      |                    |                                                       | 23.6                        | 2576 stroke (39505)            |
| 27 | Kokubo 2017 <sup>50b</sup>      | Japan      | 1990-2009  | F; 40-69 y     | 23.6 | FFQ                | follow-up examination                                 | 1846 stroke (45788)         | 333 VS. 213 (0.88 (0.67-1.14)) |
| 28 |                                 |            |            | M; ≥35 y       |      |                    |                                                       | 22.6                        | 266 T2D (5885)                 |
| 29 | Konishi 2017 <sup>51</sup>      | Japan      | 1992-2002  | F; ≥35 y       | 22.1 | validated FFQ      | self-reported questionnaire                           | 172 T2D (7640)              | 432 VS. 285 (0.50 (0.30-0.84)) |
| 30 |                                 |            |            |                |      |                    |                                                       |                             |                                |

38 Abbreviations: FFQ, food-frequency questionnaire; SFFQ, semi-quantitative food-frequency questionnaire; BMI, body mass index; T2D, type 2 diabetes; NA, not available.

39 <sup>a</sup>, different ethnicities of participants are in multiple nations cohort;

40 <sup>b</sup>, the dose of magnesium intake which is not available in this study is retrieved from the same cohort reported in former publication;

41 <sup>c</sup> the range of enrolled participants age is not mentioned.

42

43

44

45

46

1  
2  
3  
4  
5  
6  
7  
8  
9  
10  
11  
12  
13  
14  
15  
16  
17  
18  
19  
20  
21  
22  
23  
24  
25  
26  
27  
28  
29  
30  
31  
32  
33  
34  
35  
36  
37  
38  
39  
40  
41  
42  
43  
44  
45  
46

For peer review only

**Table S5.** Methodological Quality Assessments of the Included Studies with Newcastle-Ottawa Scales

|    | Study | Selection                         |                   |                           |                     | Comparability | Outcome               |                     |                       | Total score |
|----|-------|-----------------------------------|-------------------|---------------------------|---------------------|---------------|-----------------------|---------------------|-----------------------|-------------|
|    |       | Exposed cohort                    | Nonexposed cohort | Ascertainment of exposure | Outcome of interest |               | Assessment of outcome | Length of follow-up | Adequacy of follow-up |             |
| 1  |       |                                   |                   |                           |                     |               |                       |                     |                       |             |
| 2  |       |                                   |                   |                           |                     |               |                       |                     |                       |             |
| 3  |       |                                   |                   |                           |                     |               |                       |                     |                       |             |
| 4  |       |                                   |                   |                           |                     |               |                       |                     |                       |             |
| 5  |       |                                   |                   |                           |                     |               |                       |                     |                       |             |
| 6  |       |                                   |                   |                           |                     |               |                       |                     |                       |             |
| 7  | 1997  | Salmeron et al, <sup>11</sup>     | *                 | *                         | *                   | *             | **                    | *                   | *                     | 9           |
| 8  | 1997  | Salmeron et al (2), <sup>12</sup> | *                 | *                         | *                   | *             | **                    | *                   | *                     | 9           |
| 9  | 1998  | Ascherio et al, <sup>13</sup>     | *                 | *                         | *                   | *             | **                    | *                   | *                     | 9           |
| 10 | 1999  | Iso et al, <sup>14</sup>          | *                 | *                         | *                   | *             | **                    | *                   | *                     | 9           |
| 11 | 1999  | Kao et al, <sup>15</sup>          | *                 | *                         | *                   | *             | **                    | *                   | *                     | 9           |
| 12 | 1999  | Kao et al, <sup>15</sup>          | *                 | *                         | *                   | *             | **                    | *                   | *                     | 9           |
| 13 | 2000  | Liu et al, <sup>16</sup>          | *                 | *                         | *                   | *             | **                    | *                   | *                     | 9           |
| 14 | 2000  | Meyer et al, <sup>17</sup>        | *                 | *                         | *                   | *             | **                    | *                   | *                     | 9           |
| 15 | 2000  | Meyer et al, <sup>17</sup>        | *                 | *                         | *                   | *             | **                    | *                   | *                     | 9           |
| 16 | 2004  | Hodge et al, <sup>18</sup>        | *                 | *                         | *                   | *             | *                     | *                   | *                     | 7           |
| 17 | 2004  | Hodge et al, <sup>18</sup>        | *                 | *                         | *                   | *             | *                     | *                   | *                     | 7           |
| 18 | 2004  | Lopez et al, <sup>19</sup>        | *                 | *                         | *                   | *             | **                    | *                   | *                     | 9           |
| 19 | 2004  | Lopez et al, <sup>19</sup>        | *                 | *                         | *                   | *             | **                    | *                   | *                     | 9           |
| 20 | 2004  | Song et al, <sup>20</sup>         | *                 | *                         | *                   | *             | **                    | *                   | *                     | 9           |
| 21 | 2004  | Song et al, <sup>20</sup>         | *                 | *                         | *                   | *             | **                    | *                   | *                     | 9           |
| 22 | 2005  | Song et al, <sup>21</sup>         | *                 | *                         | *                   | *             | **                    | *                   | *                     | 9           |
| 23 | 2005  | Song et al, <sup>21</sup>         | *                 | *                         | *                   | *             | **                    | *                   | *                     | 9           |
| 24 | 2006  | Liu et al, <sup>22</sup>          | *                 | *                         | *                   | *             | **                    | *                   | *                     | 9           |
| 25 | 2006  | Liu et al, <sup>22</sup>          | *                 | *                         | *                   | *             | **                    | *                   | *                     | 9           |
| 26 | 2006  | Pereira et al, <sup>23</sup>      | *                 | *                         | *                   | *             | **                    | *                   | *                     | 9           |
| 27 | 2006  | Pereira et al, <sup>23</sup>      | *                 | *                         | *                   | *             | **                    | *                   | *                     | 9           |
| 28 | 2006  | Pittas et al, <sup>24</sup>       | *                 | *                         | *                   | *             | **                    | *                   | *                     | 9           |
| 29 | 2006  | Pittas et al, <sup>24</sup>       | *                 | *                         | *                   | *             | **                    | *                   | *                     | 9           |
| 30 | 2006  | Van et al, <sup>25</sup>          | *                 | *                         | *                   | *             | **                    | *                   | *                     | 9           |
| 31 | 2006  | Van et al, <sup>25</sup>          | *                 | *                         | *                   | *             | **                    | *                   | *                     | 9           |
| 32 | 2007  | Schulze et al, <sup>26</sup>      | *                 | *                         | *                   | *             | **                    | *                   | *                     | 9           |
| 33 | 2007  | Schulze et al, <sup>26</sup>      | *                 | *                         | *                   | *             | **                    | *                   | *                     | 9           |
| 34 | 2008  | Larsson et al, <sup>27</sup>      | *                 | *                         | *                   | *             | **                    | *                   | *                     | 9           |
| 35 | 2008  | Larsson et al, <sup>27</sup>      | *                 | *                         | *                   | *             | **                    | *                   | *                     | 9           |
| 36 | 2008  | Weng et al, <sup>28</sup>         | *                 | *                         | *                   | *             | **                    | *                   | *                     | 9           |
| 37 | 2008  | Weng et al, <sup>28</sup>         | *                 | *                         | *                   | *             | **                    | *                   | *                     | 9           |
| 38 | 2009  | Kirii et al, <sup>29</sup>        | *                 | *                         | *                   | *             | **                    | *                   | *                     | 9           |
| 39 | 2009  | Kirii et al, <sup>29</sup>        | *                 | *                         | *                   | *             | **                    | *                   | *                     | 9           |
| 40 | 2009  | Ohira et al, <sup>30</sup>        | *                 | *                         | *                   | *             | **                    | *                   | *                     | 9           |
| 41 | 2009  | Ohira et al, <sup>30</sup>        | *                 | *                         | *                   | *             | **                    | *                   | *                     | 9           |
| 42 | 2009  | Villegas et al, <sup>31</sup>     | *                 | *                         | *                   | *             | **                    | *                   | *                     | 9           |
| 43 | 2009  | Villegas et al, <sup>31</sup>     | *                 | *                         | *                   | *             | **                    | *                   | *                     | 9           |
| 44 | 2010  | Hopping et al, <sup>32</sup>      | *                 | *                         | *                   | *             | **                    | *                   | *                     | 9           |
| 45 | 2010  | Hopping et al, <sup>32</sup>      | *                 | *                         | *                   | *             | **                    | *                   | *                     | 9           |
| 46 | 2010  | Kim et al, <sup>33</sup>          | *                 | *                         | *                   | *             | **                    | *                   | *                     | 8           |
| 47 | 2010  | Kim et al, <sup>33</sup>          | *                 | *                         | *                   | *             | **                    | *                   | *                     | 8           |
| 48 | 2010  | Kirii et al, <sup>34</sup>        | *                 | *                         | *                   | *             | **                    | *                   | *                     | 9           |
| 49 | 2010  | Kirii et al, <sup>34</sup>        | *                 | *                         | *                   | *             | **                    | *                   | *                     | 9           |
| 50 | 2010  | Nanri et al, <sup>35</sup>        | *                 | *                         | *                   | *             | **                    | *                   | *                     | 9           |
| 51 | 2010  | Nanri et al, <sup>35</sup>        | *                 | *                         | *                   | *             | **                    | *                   | *                     | 9           |
| 52 | 2011  | Larsson et al, <sup>36</sup>      | *                 | *                         | *                   | *             | **                    | *                   | *                     | 9           |
| 53 | 2011  | Larsson et al, <sup>36</sup>      | *                 | *                         | *                   | *             | **                    | *                   | *                     | 9           |
| 54 | 2012  | Weng et al, <sup>37</sup>         | *                 | *                         | *                   | *             | **                    | *                   | *                     | 8           |
| 55 | 2012  | Weng et al, <sup>37</sup>         | *                 | *                         | *                   | *             | **                    | *                   | *                     | 8           |



|    |      |                                    |   |   |   |   |    |   |   |   |   |
|----|------|------------------------------------|---|---|---|---|----|---|---|---|---|
| 1  | 2012 | Zhang et al, <sup>38</sup>         | * | * | * | * | ** | * | * | * | 9 |
| 2  | 2013 | Hata et al, <sup>39</sup>          | * | * | * | * | ** | * | * | * | 9 |
| 3  | 2013 | Lin et al, <sup>40</sup>           | * | * | * | * | ** | * | * | * | 9 |
| 4  | 2013 | Oba et al, <sup>41</sup>           | * | * | * | * | ** | * | * | * | 9 |
| 5  | 2013 | Sluijs et al, <sup>42</sup>        | * | * | * | * | ** |   | * | * | 8 |
| 6  | 2014 | Hruby et al, <sup>43</sup>         | * | * | * | * | ** | * | * | * | 9 |
| 7  | 2014 | Sluijs et al, <sup>44</sup>        | * | * | * | * | ** | * | * | * | 9 |
| 8  | 2015 | Adebamowo et al, <sup>45</sup>     | * | * | * | * | ** | * | * | * | 9 |
| 9  | 2015 | Adebamowo et al (2), <sup>46</sup> | * | * | * | * | ** | * | * | * | 9 |
| 10 | 2015 | Bain et al, <sup>47</sup>          | * | * | * | * | ** | * | * | * | 9 |
| 11 | 2015 | Huang et al, <sup>48</sup>         | * | * | * | * | ** | * | * | * | 8 |
| 12 | 2017 | Hruby et al, <sup>49</sup>         | * | * | * | * | ** | * | * | * | 9 |
| 13 | 2017 | Kokubo et al, <sup>50</sup>        | * | * | * | * | ** | * | * | * | 9 |
| 14 | 2017 | Konishi et al, <sup>51</sup>       | * | * | * | * | *  | * | * | * | 9 |

1  
2  
3  
4  
5  
6  
7  
8  
9  
10  
11  
12  
13  
14  
15  
16  
17  
18  
19  
20  
21  
22  
23  
24  
25  
26  
27  
28  
29  
30  
31  
32  
33  
34  
35  
36  
37  
38  
39  
40  
41  
42  
43  
44  
45  
46  
47  
48  
49  
50  
51  
52  
53  
54  
55  
56  
57  
58  
59  
60



1  
2  
3  
4  
5  
6  
7  
8  
9  
10  
11  
12  
13  
14  
15  
16  
17  
18  
19  
20  
21  
22  
23  
24  
25  
26  
27  
28  
29  
30  
31  
32  
33  
34  
35  
36  
37  
38  
39  
40  
41  
42  
43  
44  
45  
46  
47  
48  
49  
50  
51  
52  
53  
54  
55  
56  
57  
58  
59  
60

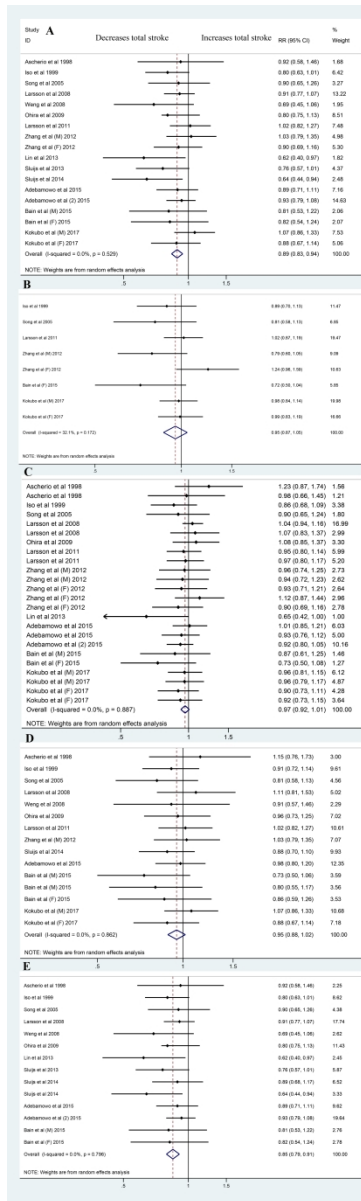

1  
2  
3  
4  
5  
6  
7  
8  
9  
10  
11  
12  
13  
14  
15  
16  
17  
18  
19  
20  
21  
22  
23  
24  
25  
26  
27  
28  
29  
30  
31  
32  
33  
34  
35  
36  
37  
38  
39  
40  
41  
42  
43  
44  
45  
46  
47  
48  
49  
50  
51  
52  
53  
54  
55  
56  
57  
58  
59  
60



1  
2  
3  
4  
5  
6  
7  
8  
9  
10  
11  
12  
13  
14  
15  
16  
17  
18  
19  
20  
21  
22  
23  
24  
25  
26  
27  
28  
29  
30  
31  
32  
33  
34  
35  
36  
37  
38  
39  
40  
41  
42  
43  
44  
45  
46  
47  
48  
49  
50  
51  
52  
53  
54  
55  
56  
57  
58  
59  
60



1  
2  
3  
4  
5  
6  
7  
8  
9  
10  
11  
12  
13  
14  
15  
16  
17  
18  
19  
20  
21  
22  
23  
24  
25  
26  
27  
28  
29  
30  
31  
32  
33  
34  
35  
36  
37  
38  
39  
40  
41  
42  
43  
44  
45  
46  
47  
48  
49  
50  
51  
52  
53  
54  
55  
56  
57  
58  
59  
60



1  
2  
3  
4  
5  
6  
7  
8  
9  
10  
11  
12  
13  
14  
15  
16  
17  
18  
19  
20  
21  
22  
23  
24  
25  
26  
27  
28  
29  
30  
31  
32  
33  
34  
35  
36  
37  
38  
39  
40  
41  
42  
43  
44  
45  
46  
47  
48  
49  
50  
51  
52  
53  
54  
55  
56  
57  
58  
59  
60

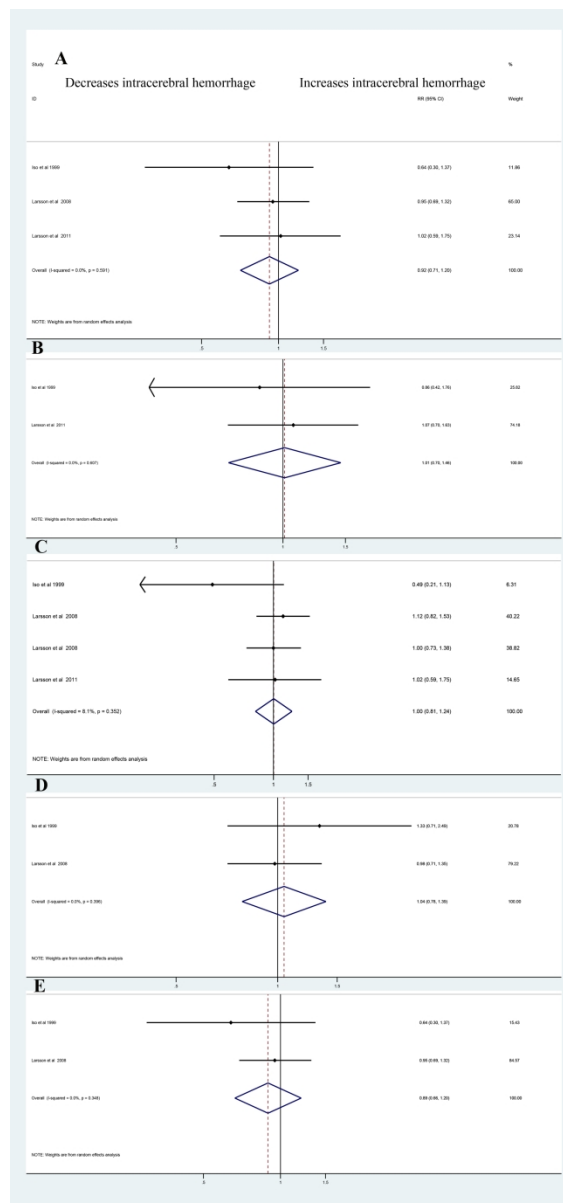

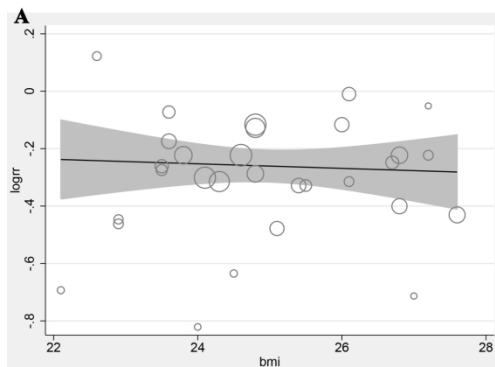

```

B
. tabulate sex, generate ( sexnew )

      sex | Freq.  Percent   Cum.
-----+-----
both male and female |    10     28.57   28.57
female             |    17     48.57   77.14
male               |     8     22.86  100.00
-----+-----
Total              |    35    100.00

. metareg logrr sexnew1 sexnew2 sexnew3, wsse (selogrr) knapphartung reml
note: sexnew3 dropped because of collinearity

Meta-regression              Number of obs =   35
RMSE estimate of between-study variance      tau2 = .004692
% residual variation due to heterogeneity     I-squared_res = 36.58%
Proportion of between-study variance explained  Adj R-squared = -26.08%
Joint test for all covariates                 Model F(2,32) = 1.31
With Knapp-Hartung modification              Prob > F = 0.2841

      logrr | Coef.  Std. Err.   t   P>|t|   [95% Conf. Interval]
-----+-----
sexnew1    | -1.1314075  .0857798   -1.53  0.135   -1.3061323   -.0433174
sexnew2    | -.0630804   .0541113   -1.17  0.252   -1.733016   -.0471407
      _cons | -1.956565   .0461514   -4.24  0.000   -2.096637   -1.1016492
    
```

```

C
. tabulate participantregion, generate ( participantregionnew )

      participantregion | Freq.  Percent   Cum.
-----+-----
on                    |    35    100.00
Asia                  |    13     37.14   37.14
Multiple nations     |     5     14.29   51.43
North America        |    17     48.57   100.00
-----+-----
Total                 |    35    100.00

. metareg logrr participantregionnew1 participantregionnew2 participantregionnew3, wsse (selogrr) knapphartung reml
note: participantregionnew3 dropped because of collinearity

Meta-regression              Number of obs =   35
RMSE estimate of between-study variance      tau2 = .004698
% residual variation due to heterogeneity     I-squared_res = 35.22%
Proportion of between-study variance explained  Adj R-squared = -30.80%
Joint test for all covariates                 Model F(2,32) = 0.10
With Knapp-Hartung modification              Prob > F = 0.9047

      logrr | Coef.  Std. Err.   t   P>|t|   [95% Conf. Interval]
-----+-----
participantregionnew2 | .0027567  .0731865   0.04  0.970   -1.63193   .1518327
participantregionnew1 | -.001657  .0599158  -0.34  0.739   -1.422102   .1018788
      _cons | -2.392399  .0510872  -4.68  0.000   -2.483012   -1.351766
    
```

```

D
. tabulate dietaryassessment, generate ( dietaryassessmentnew )

      dietaryassessment | Freq.  Percent   Cum.
-----+-----
24h dietary recall and FFQ |     1     2.86   2.86
FFQ                       |     4    11.43  14.29
SPFQ                      |     1     2.86  17.14
validated DRQ             |     1     2.86  20.00
validated FFQ             |    17    48.57  68.57
validated SPFQ            |    15    42.86  100.00
-----+-----
Total                      |    35    100.00

. metareg logrr dietaryassessmentnew1 dietaryassessmentnew2 dietaryassessmentnew3 dietaryassessmentnew4 dietaryassessmentnew5 dietaryassessmentnew6 dietaryassessmentnew7 dietaryassessmentnew8 dietaryassessmentnew9 dietaryassessmentnew10 dietaryassessmentnew11 dietaryassessmentnew12 dietaryassessmentnew13 dietaryassessmentnew14 dietaryassessmentnew15 dietaryassessmentnew16 dietaryassessmentnew17 dietaryassessmentnew18 dietaryassessmentnew19 dietaryassessmentnew20 dietaryassessmentnew21 dietaryassessmentnew22 dietaryassessmentnew23 dietaryassessmentnew24 dietaryassessmentnew25 dietaryassessmentnew26 dietaryassessmentnew27 dietaryassessmentnew28 dietaryassessmentnew29 dietaryassessmentnew30 dietaryassessmentnew31 dietaryassessmentnew32 dietaryassessmentnew33 dietaryassessmentnew34 dietaryassessmentnew35 dietaryassessmentnew36 dietaryassessmentnew37 dietaryassessmentnew38 dietaryassessmentnew39 dietaryassessmentnew40 dietaryassessmentnew41 dietaryassessmentnew42 dietaryassessmentnew43 dietaryassessmentnew44 dietaryassessmentnew45 dietaryassessmentnew46 dietaryassessmentnew47 dietaryassessmentnew48 dietaryassessmentnew49 dietaryassessmentnew50 dietaryassessmentnew51 dietaryassessmentnew52 dietaryassessmentnew53 dietaryassessmentnew54 dietaryassessmentnew55 dietaryassessmentnew56 dietaryassessmentnew57 dietaryassessmentnew58 dietaryassessmentnew59 dietaryassessmentnew60 dietaryassessmentnew61 dietaryassessmentnew62 dietaryassessmentnew63 dietaryassessmentnew64 dietaryassessmentnew65 dietaryassessmentnew66 dietaryassessmentnew67 dietaryassessmentnew68 dietaryassessmentnew69 dietaryassessmentnew70 dietaryassessmentnew71 dietaryassessmentnew72 dietaryassessmentnew73 dietaryassessmentnew74 dietaryassessmentnew75 dietaryassessmentnew76 dietaryassessmentnew77 dietaryassessmentnew78 dietaryassessmentnew79 dietaryassessmentnew80 dietaryassessmentnew81 dietaryassessmentnew82 dietaryassessmentnew83 dietaryassessmentnew84 dietaryassessmentnew85 dietaryassessmentnew86 dietaryassessmentnew87 dietaryassessmentnew88 dietaryassessmentnew89 dietaryassessmentnew90 dietaryassessmentnew91 dietaryassessmentnew92 dietaryassessmentnew93 dietaryassessmentnew94 dietaryassessmentnew95 dietaryassessmentnew96 dietaryassessmentnew97 dietaryassessmentnew98 dietaryassessmentnew99 dietaryassessmentnew100, wsse (selogrr) knapphartung reml
note: dietaryassessmentnew2 through dietaryassessmentnew100 dropped because of collinearity

Meta-regression              Number of obs =   35
RMSE estimate of between-study variance      tau2 = .004258
% residual variation due to heterogeneity     I-squared_res = 38.44%
Proportion of between-study variance explained  Adj R-squared = -14.42%
Joint test for all covariates                 Model F(15,29) = 0.16
With Knapp-Hartung modification              Prob > F = 0.5210

      logrr | Coef.  Std. Err.   t   P>|t|   [95% Conf. Interval]
-----+-----
dietaryassessmentnew1 | .1072405  .5101822   0.20  0.841   -1.07096   1.339455
dietaryassessmentnew2 | .0470373  .294068   1.58  0.124   -1.394023   1.073557
dietaryassessmentnew3 | -.5104405 .311752   -1.64  0.107   -1.152599   1.155949
dietaryassessmentnew4 | .3690754 .2813794   1.30  0.205   -1.204983   .4659589
dietaryassessmentnew5 | .3948872  .2812421   1.40  0.171   -1.057583   .4697238
dietaryassessmentnew6 | -.6388793 .279225   -2.27  0.031   -1.205958   -.071790
    
```



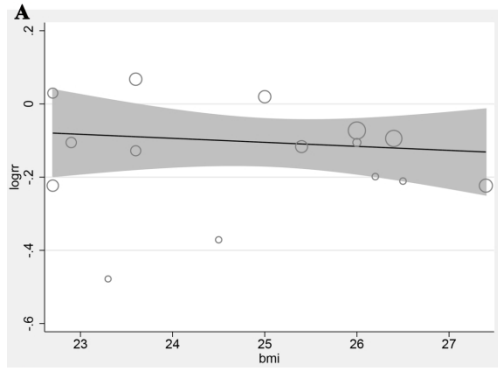

```

B tabulate sex, generate (sexnew)

      sex      Freq.      Percent      Cum.
-----+-----
both male and female      3      20.00      20.00
female                    7      46.67      66.67
male                      5      33.33      100.00
-----+-----
Total                    15      100.00

. metareg logrr sexnew1 sexnew2 sexnew3, wase (selogrr) knapphartung reml
note: sexnew1 dropped because of collinearity

Meta-regression      Number of obs = 15
REML estimate of between-study variance      tau2 = 0
% residual variation due to heterogeneity      I-squared_res = 0.00%
Proportion of between-study variance explained      Adj R-squared = .%
Joint test for all covariates      Model F(2,12) = 2.64
With Knapp-Hartung modification      Prob > F = 0.1120

      logrr      Coef.      Std. Err.      t      P>|t|      [95% Conf. Interval]
-----+-----
sexnew2      .1870375      .0983982      1.90      0.082      -.0273537      .4014286
sexnew3     -2312472      .1011998      2.29      0.041      .0107518      .4517427
      _cons      -2844281      .0870478     -3.27      0.007     -.4740889     -.0947673
    
```

```

C . tabulate participantregion, generate (participantregionnew)

participantregion      Freq.      Percent      Cum.
-----+-----
asia                   6      33.33      33.33
Europe                 4      22.22      55.56
North America         4      22.22      77.78
-----+-----
Total                  18      100.00

. metareg logrr participantregionnew1 participantregionnew2 participantregionnew3, wase (selogrr) knapphartung reml random
note: participantregionnew3 dropped because of collinearity

Meta-regression      Number of obs = 18
REML estimate of between-study variance      tau2 = 0
% residual variation due to heterogeneity      I-squared_res = 1.81%
Proportion of between-study variance explained      Adj R-squared = .%
Joint test for all covariates      Model F(2,15) = 0.32
With Knapp-Hartung modification      Prob > F = 0.7332

      logrr      Coef.      Std. Err.      t      P>|t|      [95% Conf. Interval]
-----+-----
participantregionnew1     .056278     .0743754      0.74      0.470     -.1061605     .1196149
participantregionnew2    -1028959     .8725841     -1.18      0.249     -1.518134     .1574053
      _cons     -1378955     .8476362     -1.63      0.112     -2.387575     -.3694336
    
```

```

D . tabulate dietaryassessment, generate (dietaryassessmentnew)

dietaryassessment      Freq.      Percent      Cum.
-----+-----
1-day diary recall      2      11.11      11.11
FFQ                     4      22.22      33.33
validated FFQ           9      50.00      83.33
validated SPQ           3      16.67      100.00
-----+-----
Total                   18      100.00

. metareg logrr dietaryassessmentnew1 dietaryassessmentnew2 dietaryassessmentnew3, wase (selogrr) knapphartung
> reml
note: dietaryassessmentnew3 dropped because of collinearity

Meta-regression      Number of obs = 18
REML estimate of between-study variance      tau2 = 0
% residual variation due to heterogeneity      I-squared_res = 0.20%
Proportion of between-study variance explained      Adj R-squared = .%
Joint test for all covariates      Model F(3,14) = 0.21
With Knapp-Hartung modification      Prob > F = 0.9811

      logrr      Coef.      Std. Err.      t      P>|t|      [95% Conf. Interval]
-----+-----
dietaryassessmentnew1    -0596066     .167476     -3.56      0.002     -.0945537     -.0086595
dietaryassessmentnew2    -1046332     .1615368     -6.48      0.000     -1.061318     -.9853465
dietaryassessmentnew3    -1211845     .291513     -4.16      0.000     -1.540595     -.6831355
      _cons     -12845481     .1547379    -83.81      0.000     -1.5407374     -1.014813
    
```



```

B tabulate sex, generate ( sexnew )
      sex      Freq.   Percent   Cum.
-----+-----
both male and female      4     26.67    26.67
female                    7     46.67    73.33
male                      4     26.67   100.00
-----+-----
Total                      15    100.00

. metareg logrr sexnew1 sexnew2 sexnew3, wase (selogrr) knapphartung reml
note: sexnew3 dropped because of collinearity

Meta-regression              Number of obs =    15
REML estimate of between-study variance      tau2 = .004782
% residual variation due to heterogeneity     I-squared_res = 1.79%
Proportion of between-study variance explained  Adj R-squared = .%
Joint test for all covariates                Model F(2,12) = 2.39
With Knapp-Hartung modification              Prob > F = 0.1339

      logrr      Coef.   Std. Err.   t   P>|t|   [95% Conf. Interval]
-----+-----
sexnew1      -.2383161   .109578   -2.17   0.050   -0.4770662   .0004339
sexnew2      -.0739192   .0940187   -0.79   0.447   -0.2787683   .1309299
      _cons      -.0480002   .0681983   -0.70   0.495   -0.1965933   .1005894
    
```

```

C . tabulate participantregion, generate ( participantregionnew )
      participantregion
      region      Freq.   Percent   Cum.
-----+-----
Asia              4     40.00    40.00
Europe            3     30.00    70.00
North America     8     80.00   100.00
-----+-----
Total             10    100.00

. metareg logrr participantregionnew1 participantregionnew2, wase (selogrr) knapphartung reml
note: participantregionnew3 dropped because of collinearity

Meta-regression              Number of obs =    15
REML estimate of between-study variance      tau2 = .0014
% residual variation due to heterogeneity     I-squared_res = 21.74%
Proportion of between-study variance explained  Adj R-squared = .%
Joint test for all covariates                Model F(2,12) = 0.56
With Knapp-Hartung modification              Prob > F = 0.5842

      logrr      Coef.   Std. Err.   t   P>|t|   [95% Conf. Interval]
-----+-----
participantregionnew1      -.1089353   .1083661   1.01   0.335   -0.1271992   .3450197
participantregionnew2      .0517202   .0911749   0.53   0.598   -0.1849328   .1030732
      _cons      -.1429514   .0453255   -3.15   0.008   -0.2052493   -.0806492
    
```

```

D . tabulate dietaryassessment, generate ( dietaryassessmentnew )
      dietaryassessment
      assessment      Freq.   Percent   Cum.
-----+-----
FFQ                  6     40.00    40.00
validated FFQ        9     60.00   100.00
-----+-----
Total                 15    100.00

. metareg logrr dietaryassessmentnew1 dietaryassessmentnew2, wase (selogrr) knapphartung reml
note: dietaryassessmentnew3 dropped because of collinearity

Meta-regression              Number of obs =    15
REML estimate of between-study variance      tau2 = .001922
% residual variation due to heterogeneity     I-squared_res = 21.79%
Proportion of between-study variance explained  Adj R-squared = .%
With Knapp-Hartung modification

      logrr      Coef.   Std. Err.   t   P>|t|   [95% Conf. Interval]
-----+-----
dietaryassessmentnew2      .0410573   .0897444   0.46   0.655   -0.1508236   .2445382
      _cons      -.1429514   .0453255   -3.15   0.008   -0.2052493   -.0806492
    
```

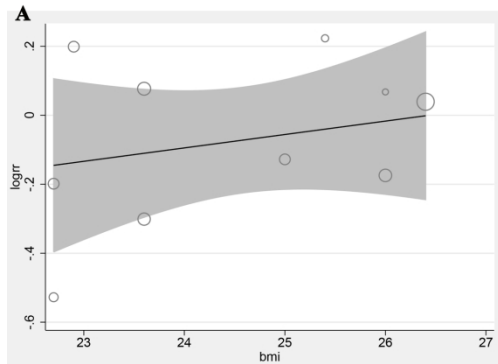

**C**

```
. tabulate participantregion, generate ( participantregionew )
```

| participantregion | Freq. | Percent | Cum.   |
|-------------------|-------|---------|--------|
| Asia              | 4     | 40.00   | 40.00  |
| Europe            | 2     | 20.00   | 60.00  |
| North America     | 4     | 40.00   | 100.00 |
| Total             | 10    | 100.00  |        |

```
. metareg logrr participantregionew1 participantregionew2 participantregionew3, wsize (selogrr) knapphartung reml
note: participantregionew3 dropped because of collinearity
```

Meta-regression

|                                                |               |   |          |
|------------------------------------------------|---------------|---|----------|
| REML estimate of between-study variance        | tau2          | = | -.608835 |
| % residual variation due to heterogeneity      | I-squared_res | = | 15.78%   |
| Proportion of between-study variance explained | Adj R-squared | = | .%       |
| Joint test for all covariates                  | Model # (2,3) | = | 0.14     |
| With Knapp-Hartung modification                | Prob > F      | = | 0.8726   |

| logrr                | Coef.     | Std. Err. | t     | P> t  | [95% Conf. Interval] |
|----------------------|-----------|-----------|-------|-------|----------------------|
| participantregionew1 | -.010555  | .1797495  | -0.06 | 0.954 | -.4356955 .4143845   |
| participantregionew2 | .0796745  | .1944402  | 0.41  | 0.694 | -.3801034 .5394524   |
| _cons                | -.9943218 | .1371043  | -6.49 | 0.514 | -.4195164 .228930    |

**B**

```
. tabulate sex, generate ( sexnew )
```

| sex    | Freq. | Percent | Cum.   |
|--------|-------|---------|--------|
| female | 6     | 60.00   | 60.00  |
| male   | 4     | 40.00   | 100.00 |
| Total  | 10    | 100.00  |        |

```
. metareg logrr sexnew1 sexnew2, wsize (selogrr) knapphartung reml
note: sexnew2 dropped because of collinearity
```

Meta-regression

|                                                |               |   |       |
|------------------------------------------------|---------------|---|-------|
| REML estimate of between-study variance        | tau2          | = | 0     |
| % residual variation due to heterogeneity      | I-squared_res | = | 0.42% |
| Proportion of between-study variance explained | Adj R-squared | = | .%    |
| With Knapp-Hartung modification                |               |   |       |

| logrr   | Coef.     | Std. Err. | t     | P> t  | [95% Conf. Interval] |
|---------|-----------|-----------|-------|-------|----------------------|
| sexnew1 | -.1120692 | .1333867  | -0.84 | 0.425 | -.4196595 .1955211   |
| _cons   | -.0110753 | .0978042  | -0.11 | 0.913 | -.2366123 .2144617   |

**D**

```
. tabulate dietaryassessment, generate ( dietaryassessmentnew )
```

| dietaryassessment | Freq. | Percent | Cum.   |
|-------------------|-------|---------|--------|
| FFQ               | 4     | 40.00   | 40.00  |
| validated FFQ     | 6     | 60.00   | 100.00 |
| Total             | 10    | 100.00  |        |

```
. metareg logrr dietaryassessmentnew1 dietaryassessmentnew2, wsize (selogrr) knapphartung reml
note: dietaryassessmentnew2 dropped because of collinearity
```

Meta-regression

|                                                |               |   |         |
|------------------------------------------------|---------------|---|---------|
| REML estimate of between-study variance        | tau2          | = | .001097 |
| % residual variation due to heterogeneity      | I-squared_res | = | 6.09%   |
| Proportion of between-study variance explained | Adj R-squared | = | .%      |
| With Knapp-Hartung modification                |               |   |         |

| logrr                 | Coef.    | Std. Err. | t     | P> t  | [95% Conf. Interval] |
|-----------------------|----------|-----------|-------|-------|----------------------|
| dietaryassessmentnew1 | .0642559 | .1426454  | 0.45  | 0.644 | -.2648051 .3911941   |
| _cons                 | -.112665 | .1133825  | -0.99 | 0.349 | -.2741295 .1487955   |

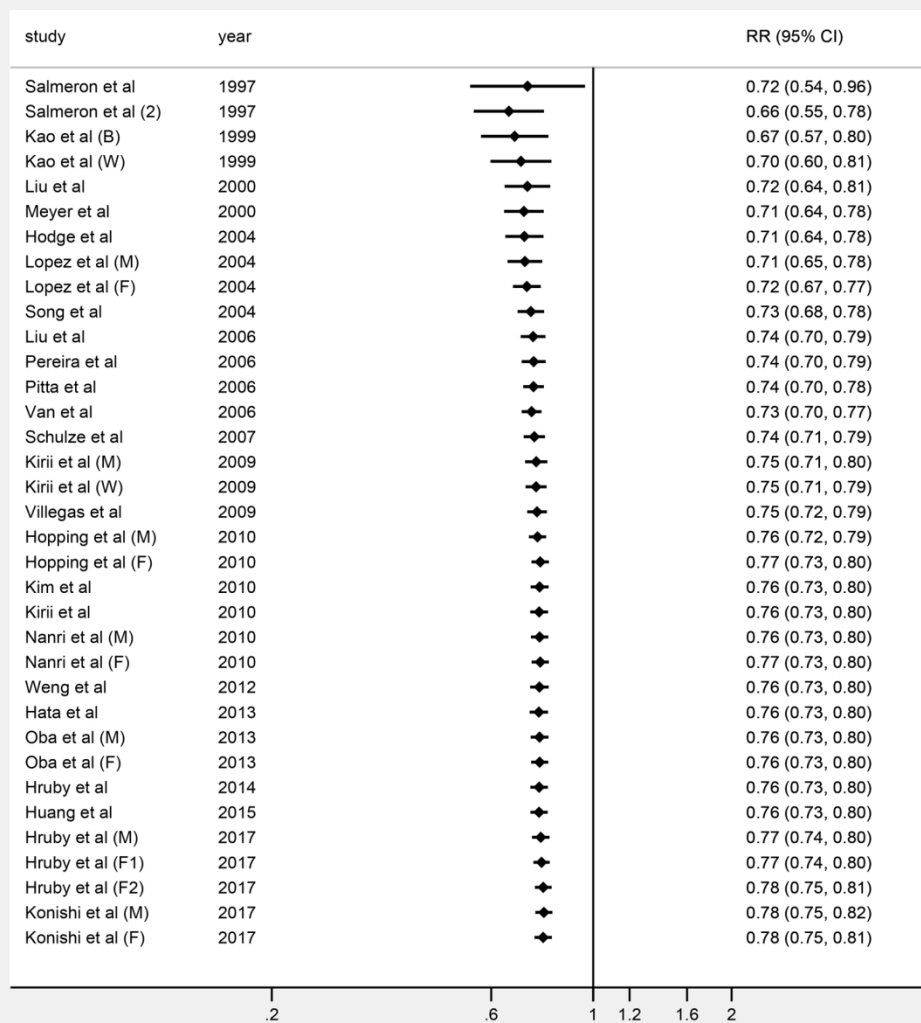

1  
2  
3  
4  
5  
6  
7  
8  
9  
10  
11  
12  
13  
14  
15  
16  
17  
18  
19  
20  
21  
22  
23  
24  
25  
26  
27  
28  
29  
30  
31  
32  
33  
34  
35  
36  
37  
38  
39  
40  
41  
42  
43  
44  
45  
46  
47  
48  
49  
50  
51  
52  
53  
54  
55  
56  
57  
58  
59  
60

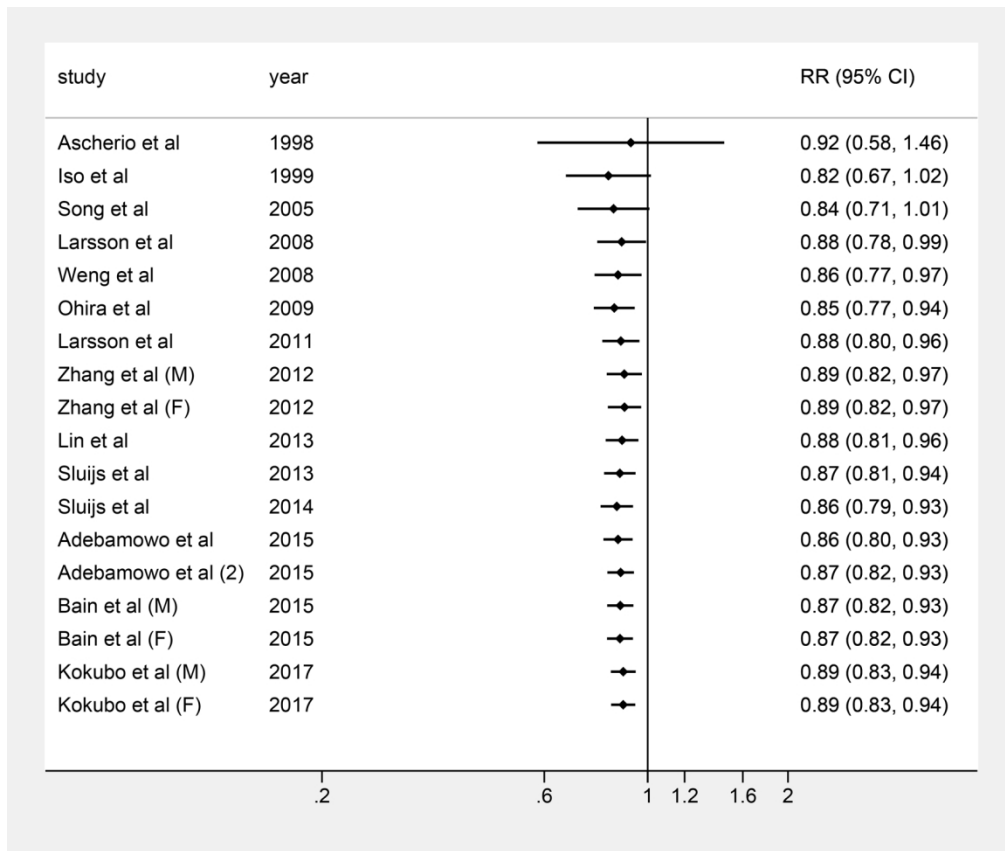

1  
2  
3  
4  
5  
6  
7  
8  
9  
10  
11  
12  
13  
14  
15  
16  
17  
18  
19  
20  
21  
22  
23  
24  
25  
26  
27  
28  
29  
30  
31  
32  
33  
34  
35  
36  
37  
38  
39  
40  
41  
42  
43  
44  
45  
46  
47  
48  
49  
50  
51  
52  
53  
54  
55  
56  
57  
58  
59  
60



1  
2  
3  
4  
5  
6  
7  
8  
9  
10  
11  
12  
13  
14  
15  
16  
17  
18  
19  
20  
21  
22  
23  
24  
25  
26  
27  
28  
29  
30  
31  
32  
33  
34  
35  
36  
37  
38  
39  
40  
41  
42  
43  
44  
45  
46  
47  
48  
49  
50  
51  
52  
53  
54  
55  
56  
57  
58  
59  
60

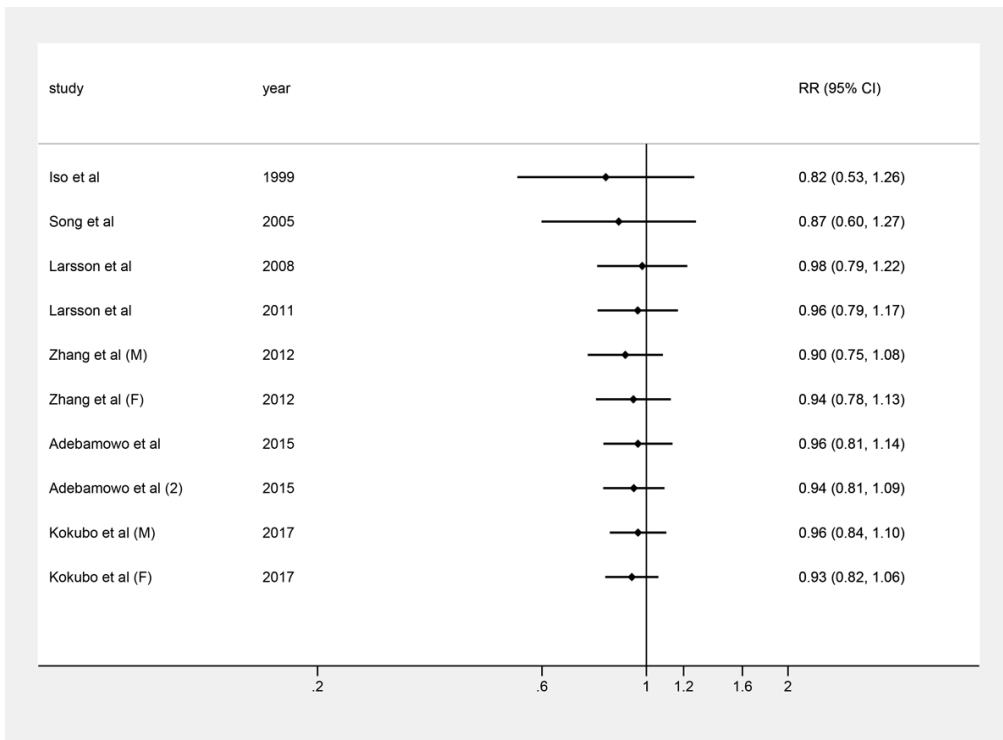

1  
2  
3  
4  
5  
6  
7  
8  
9  
10  
11  
12  
13  
14  
15  
16  
17  
18  
19  
20  
21  
22  
23  
24  
25  
26  
27  
28  
29  
30  
31  
32  
33  
34  
35  
36  
37  
38  
39  
40  
41  
42  
43  
44  
45  
46  
47  
48  
49  
50  
51  
52  
53  
54  
55  
56  
57  
58  
59  
60







# Table S1 PRISMA 2009 Checklist

| Section/topic                      | #  | Checklist item                                                                                                                                                                                                                                                                                              | Reported on page # |
|------------------------------------|----|-------------------------------------------------------------------------------------------------------------------------------------------------------------------------------------------------------------------------------------------------------------------------------------------------------------|--------------------|
| <b>TITLE</b>                       |    |                                                                                                                                                                                                                                                                                                             | <b>1</b>           |
| Title                              | 1  | Identify the report as a systematic review, meta-analysis, or both.                                                                                                                                                                                                                                         | 1                  |
| <b>ABSTRACT</b>                    |    |                                                                                                                                                                                                                                                                                                             | <b>2-3</b>         |
| Structured summary                 | 2  | Provide a structured summary including, as applicable: background; objectives; data sources; study eligibility criteria, participants, and interventions; study appraisal and synthesis methods; results; limitations; conclusions and implications of key findings; systematic review registration number. | 2-3                |
| <b>INTRODUCTION</b>                |    |                                                                                                                                                                                                                                                                                                             | <b>4-5</b>         |
| Rationale                          | 3  | Describe the rationale for the review in the context of what is already known.                                                                                                                                                                                                                              | 4                  |
| Objectives                         | 4  | Provide an explicit statement of questions being addressed with reference to participants, interventions, comparisons, outcomes, and study design (PICOS).                                                                                                                                                  | 4-5                |
| <b>METHODS</b>                     |    |                                                                                                                                                                                                                                                                                                             | <b>5-9</b>         |
| Protocol and registration          | 5  | Indicate if a review protocol exists, if and where it can be accessed (e.g., Web address), and, if available, provide registration information including registration number.                                                                                                                               | 5                  |
| Eligibility criteria               | 6  | Specify study characteristics (e.g., PICOS, length of follow-up) and report characteristics (e.g., years considered, language, publication status) used as criteria for eligibility, giving rationale.                                                                                                      | 5-6                |
| Information sources                | 7  | Describe all information sources (e.g., databases with dates of coverage, contact with study authors to identify additional studies) in the search and date last searched.                                                                                                                                  | 5-6                |
| Search                             | 8  | Present full electronic search strategy for at least one database, including any limits used, such that it could be repeated.                                                                                                                                                                               | 5-6                |
| Study selection                    | 9  | State the process for selecting studies (i.e., screening, eligibility, included in systematic review, and, if applicable, included in the meta-analysis).                                                                                                                                                   | 5-6                |
| Data collection process            | 10 | Describe method of data extraction from reports (e.g., piloted forms, independently, in duplicate) and any processes for obtaining and confirming data from investigators.                                                                                                                                  | 6                  |
| Data items                         | 11 | List and define all variables for which data were sought (e.g., PICOS, funding sources) and any assumptions and simplifications made.                                                                                                                                                                       | 6                  |
| Risk of bias in individual studies | 12 | Describe methods used for assessing risk of bias of individual studies (including specification of whether this was done at the study or outcome level), and how this information is to be used in any data synthesis.                                                                                      | 6                  |
| Summary measures                   | 13 | State the principal summary measures (e.g., risk ratio, difference in means).                                                                                                                                                                                                                               | 6                  |
| Synthesis of results               | 14 | Describe the methods of handling data and combining results of studies, if done, including measures of consistency (e.g., $I^2$ ) for each meta-analysis.                                                                                                                                                   | 6-8                |



# Table S1 PRISMA 2009 Checklist

1  
2  
3  
4  
5  
6  
7  
8  
9  
10  
11  
12  
13  
14  
15  
16  
17  
18  
19  
20  
21  
22  
23  
24  
25  
26  
27  
28  
29  
30  
31  
32  
33  
34  
35  
36  
37  
38  
39  
40  
41  
42  
43  
44  
45  
46  
47

| Section/topic                 | #  | Checklist item                                                                                                                                                                                           | Reported on page # |
|-------------------------------|----|----------------------------------------------------------------------------------------------------------------------------------------------------------------------------------------------------------|--------------------|
| Risk of bias across studies   | 15 | Specify any assessment of risk of bias that may affect the cumulative evidence (e.g., publication bias, selective reporting within studies).                                                             | 7                  |
| Additional analyses           | 16 | Describe methods of additional analyses (e.g., sensitivity or subgroup analyses, meta-regression), if done, indicating which were pre-specified.                                                         | 8-9                |
| <b>RESULTS</b>                |    |                                                                                                                                                                                                          | <b>9-16</b>        |
| Study selection               | 17 | Give numbers of studies screened, assessed for eligibility, and included in the review, with reasons for exclusions at each stage, ideally with a flow diagram.                                          | 9                  |
| Study characteristics         | 18 | For each study, present characteristics for which data were extracted (e.g., study size, PICOS, follow-up period) and provide the citations.                                                             | 9-10               |
| Risk of bias within studies   | 19 | Present data on risk of bias of each study and, if available, any outcome level assessment (see item 12).                                                                                                | 9-10               |
| Results of individual studies | 20 | For all outcomes considered (benefits or harms), present, for each study: (a) simple summary data for each intervention group (b) effect estimates and confidence intervals, ideally with a forest plot. | 10-16              |
| Synthesis of results          | 21 | Present results of each meta-analysis done, including confidence intervals and measures of consistency.                                                                                                  | 10-16              |
| Risk of bias across studies   | 22 | Present results of any assessment of risk of bias across studies (see Item 15).                                                                                                                          | 10-16              |
| Additional analysis           | 23 | Give results of additional analyses, if done (e.g., sensitivity or subgroup analyses, meta-regression [see Item 16]).                                                                                    | 10-16              |
| <b>DISCUSSION</b>             |    |                                                                                                                                                                                                          | <b>16-22</b>       |
| Summary of evidence           | 24 | Summarize the main findings including the strength of evidence for each main outcome; consider their relevance to key groups (e.g., healthcare providers, users, and policy makers).                     | 16-21              |
| Limitations                   | 25 | Discuss limitations at study and outcome level (e.g., risk of bias), and at review-level (e.g., incomplete retrieval of identified research, reporting bias).                                            | 21-22              |
| Conclusions                   | 26 | Provide a general interpretation of the results in the context of other evidence, and implications for future research.                                                                                  | 22                 |
| <b>FUNDING</b>                |    |                                                                                                                                                                                                          | <b>23</b>          |
| Funding                       | 27 | Describe sources of funding for the systematic review and other support (e.g., supply of data); role of funders for the systematic review.                                                               | 23                 |

From: Moher D, Liberati A, Tetzlaff J, Altman DG, The PRISMA Group (2009). Preferred Reporting Items for Systematic Reviews and Meta-Analyses: The PRISMA Statement. PLoS Med 6(7): e1000097. doi:10.1371/journal.pmed1000097

For more information, visit: [www.prisma-statement.org](http://www.prisma-statement.org).

## MOOSE Checklist for Meta-analyses of Observational Studies

| Item No                                     | Recommendation                                                                                                                                                                                               | Reported on Page No |
|---------------------------------------------|--------------------------------------------------------------------------------------------------------------------------------------------------------------------------------------------------------------|---------------------|
| Reporting of background should include      |                                                                                                                                                                                                              |                     |
| 1                                           | Problem definition                                                                                                                                                                                           | 4                   |
| 2                                           | Hypothesis statement                                                                                                                                                                                         | 4                   |
| 3                                           | Description of study outcome(s)                                                                                                                                                                              | 5                   |
| 4                                           | Type of exposure or intervention used                                                                                                                                                                        | 5                   |
| 5                                           | Type of study designs used                                                                                                                                                                                   | 5                   |
| 6                                           | Study population                                                                                                                                                                                             | 4-5                 |
| Reporting of search strategy should include |                                                                                                                                                                                                              |                     |
| 7                                           | Qualifications of searchers (eg, librarians and investigators)                                                                                                                                               | 6-7                 |
| 8                                           | Search strategy, including time period included in the synthesis and key words                                                                                                                               | 5-6                 |
| 9                                           | Effort to include all available studies, including contact with authors                                                                                                                                      | 5-6                 |
| 10                                          | Databases and registries searched                                                                                                                                                                            | 5-6                 |
| 11                                          | Search software used, name and version, including special features used (eg, explosion)                                                                                                                      | 5-6                 |
| 12                                          | Use of hand searching (eg, reference lists of obtained articles)                                                                                                                                             | 5-6                 |
| 13                                          | List of citations located and those excluded, including justification                                                                                                                                        | 6                   |
| 14                                          | Method of addressing articles published in languages other than English                                                                                                                                      | 6                   |
| 15                                          | Method of handling abstracts and unpublished studies                                                                                                                                                         | 6                   |
| 16                                          | Description of any contact with authors                                                                                                                                                                      | 6                   |
| Reporting of methods should include         |                                                                                                                                                                                                              |                     |
| 17                                          | Description of relevance or appropriateness of studies assembled for assessing the hypothesis to be tested                                                                                                   | 7-8                 |
| 18                                          | Rationale for the selection and coding of data (eg, sound clinical principles or convenience)                                                                                                                | 6-7                 |
| 19                                          | Documentation of how data were classified and coded (eg, multiple raters, blinding and interrater reliability)                                                                                               | 6-7                 |
| 20                                          | Assessment of confounding (eg, comparability of cases and controls in studies where appropriate)                                                                                                             | 7-9                 |
| 21                                          | Assessment of study quality, including blinding of quality assessors, stratification or regression on possible predictors of study results                                                                   | 7-9                 |
| 22                                          | Assessment of heterogeneity                                                                                                                                                                                  | 7-9                 |
| 23                                          | Description of statistical methods (eg, complete description of fixed or random effects models, justification of whether the chosen models account for predictors of study results, dose-response models, or | 7-9                 |

|                                     |                                                                     |                    |
|-------------------------------------|---------------------------------------------------------------------|--------------------|
|                                     | cumulative meta-analysis) in sufficient detail to be replicated     |                    |
| 24                                  | Provision of appropriate tables and graphics                        | 9                  |
| Reporting of results should include |                                                                     |                    |
| 25                                  | Graphic summarizing individual study estimates and overall estimate | 10-14              |
| 26                                  | Table giving descriptive information for each study included        | 10-11,<br>Table S4 |
| 27                                  | Results of sensitivity testing (eg, subgroup analysis)              | 14                 |
| 28                                  | Indication of statistical uncertainty of findings                   | 16                 |

| Item No                                 | Recommendation                                                                                                            | Reported on Page No |
|-----------------------------------------|---------------------------------------------------------------------------------------------------------------------------|---------------------|
| Reporting of discussion should include  |                                                                                                                           |                     |
| 29                                      | Quantitative assessment of bias (eg, publication bias)                                                                    | 11-14               |
| 30                                      | Justification for exclusion (eg, exclusion of non-English language citations)                                             | 10                  |
| 31                                      | Assessment of quality of included studies                                                                                 | 11, Table S5        |
| Reporting of conclusions should include |                                                                                                                           |                     |
| 32                                      | Consideration of alternative explanations for observed results                                                            | 16-22               |
| 33                                      | Generalization of the conclusions (ie, appropriate for the data presented and within the domain of the literature review) | 16, 23              |
| 34                                      | Guidelines for future research                                                                                            | 17-20, 22           |
| 35                                      | Disclosure of funding source                                                                                              | None                |
