# Supplementary material for: Association of magnesium intake with type 2 diabetes and total stroke: an updated systematic review and meta-analysis
Source: PubMed Central journal article supplement — BMJ Open. 2020 Mar 19;10(3):e032240. doi: 10.1136/bmjopen-2019-032240 (PMC7103847; doi:10.1136/bmjopen-2019-032240), 2020-03-19
Supplement: bmjopen-2019-032240supp002.pdf [file bmjopen-2019-032240supp002.pdf]

**Table S2.** MOOSE Checklist**MOOSE Checklist for Meta-analyses of Observational Studies**

| Item No                                     | Recommendation                                                                                                                             | Reported on Page No |
|---------------------------------------------|--------------------------------------------------------------------------------------------------------------------------------------------|---------------------|
| Reporting of background should include      |                                                                                                                                            |                     |
| 1                                           | Problem definition                                                                                                                         | 4                   |
| 2                                           | Hypothesis statement                                                                                                                       | 4                   |
| 3                                           | Description of study outcome(s)                                                                                                            | 5                   |
| 4                                           | Type of exposure or intervention used                                                                                                      | 5                   |
| 5                                           | Type of study designs used                                                                                                                 | 5                   |
| 6                                           | Study population                                                                                                                           | 4-5                 |
| Reporting of search strategy should include |                                                                                                                                            |                     |
| 7                                           | Qualifications of searchers (eg, librarians and investigators)                                                                             | 6-7                 |
| 8                                           | Search strategy, including time period included in the synthesis and key words                                                             | 5-6                 |
| 9                                           | Effort to include all available studies, including contact with authors                                                                    | 5-6                 |
| 10                                          | Databases and registries searched                                                                                                          | 5-6                 |
| 11                                          | Search software used, name and version, including special features used (eg, explosion)                                                    | 5-6                 |
| 12                                          | Use of hand searching (eg, reference lists of obtained articles)                                                                           | 5-6                 |
| 13                                          | List of citations located and those excluded, including justification                                                                      | 6                   |
| 14                                          | Method of addressing articles published in languages other than English                                                                    | 6                   |
| 15                                          | Method of handling abstracts and unpublished studies                                                                                       | 6                   |
| 16                                          | Description of any contact with authors                                                                                                    | 6                   |
| Reporting of methods should include         |                                                                                                                                            |                     |
| 17                                          | Description of relevance or appropriateness of studies assembled for assessing the hypothesis to be tested                                 | 7-8                 |
| 18                                          | Rationale for the selection and coding of data (eg, sound clinical principles or convenience)                                              | 6-7                 |
| 19                                          | Documentation of how data were classified and coded (eg, multiple raters, blinding and interrater reliability)                             | 6-7                 |
| 20                                          | Assessment of confounding (eg, comparability of cases and controls in studies where appropriate)                                           | 7-9                 |
| 21                                          | Assessment of study quality, including blinding of quality assessors, stratification or regression on possible predictors of study results | 7-9                 |
| 22                                          | Assessment of heterogeneity                                                                                                                | 7-9                 |
| 23                                          | Description of statistical methods (eg, complete description of fixed                                                                      | 7-9                 |

|                                     |                                                                                                                                                                                                        |                    |
|-------------------------------------|--------------------------------------------------------------------------------------------------------------------------------------------------------------------------------------------------------|--------------------|
|                                     | or random effects models, justification of whether the chosen models account for predictors of study results, dose-response models, or cumulative meta-analysis) in sufficient detail to be replicated |                    |
| 24                                  | Provision of appropriate tables and graphics                                                                                                                                                           | 9                  |
| Reporting of results should include |                                                                                                                                                                                                        |                    |
| 25                                  | Graphic summarizing individual study estimates and overall estimate                                                                                                                                    | 10-14              |
| 26                                  | Table giving descriptive information for each study included                                                                                                                                           | 10-11,<br>Table S4 |
| 27                                  | Results of sensitivity testing (eg, subgroup analysis)                                                                                                                                                 | 14                 |
| 28                                  | Indication of statistical uncertainty of findings                                                                                                                                                      | 16                 |

| Item No                                 | Recommendation                                                                                                            | Reported on Page No |
|-----------------------------------------|---------------------------------------------------------------------------------------------------------------------------|---------------------|
| Reporting of discussion should include  |                                                                                                                           |                     |
| 29                                      | Quantitative assessment of bias (eg, publication bias)                                                                    | 11-14               |
| 30                                      | Justification for exclusion (eg, exclusion of non-English language citations)                                             | 10                  |
| 31                                      | Assessment of quality of included studies                                                                                 | 11, Table S5        |
| Reporting of conclusions should include |                                                                                                                           |                     |
| 32                                      | Consideration of alternative explanations for observed results                                                            | 16-22               |
| 33                                      | Generalization of the conclusions (ie, appropriate for the data presented and within the domain of the literature review) | 16, 23              |
| 34                                      | Guidelines for future research                                                                                            | 17-20, 22           |
| 35                                      | Disclosure of funding source                                                                                              | None                |
