# Supplementary material for: Association of magnesium intake with type 2 diabetes and total stroke: an updated systematic review and meta-analysis
Source: PubMed Central journal article supplement — BMJ Open. 2020 Mar 19;10(3):e032240. doi: 10.1136/bmjopen-2019-032240 (PMC7103847; doi:10.1136/bmjopen-2019-032240), 2020-03-19
Supplement: bmjopen-2019-032240supp003.pdf [file bmjopen-2019-032240supp003.pdf]

**Table S3.** Complete Search Terms for PubMed**A search example for Pubmed**

The combined text and medical subject heading (MeSH) terms used were: “Magnesium” and “Magnesium Supplementation” “Diabetes Mellitus, Type 2”, “Stroke”, “Cerebrovascular Stroke”, and “Cohort Studies”. The complete search terms for PubMed included: (Magnesium [MeSH terms]) AND (Magnesium Supplementation [MeSH terms]) AND (Diabetes Mellitus, Type 2 [MeSH term] OR Diabetes Mellitus, Noninsulin-Dependent [Text Word] OR Diabetes Mellitus, Ketosis-Resistant [Text Word] OR Diabetes Mellitus, Non-Insulin-Dependent [Text Word] OR Non-Insulin-Dependent Diabetes Mellitus [Text Word] OR Diabetes Mellitus, Stable [Text Word] OR NIDDM [Text Word] OR Maturity-Onset Diabetes Mellitus [Text Word] OR Diabetes Mellitus, Slow-Onset [Text Word] OR Type 2 Diabetes [Text Word] OR Diabetes Mellitus, Adult-Onset [Text Word]) AND (Stroke [MeSH terms] OR Cerebrovascular Stroke [Text Word] OR Cerebrovascular Accident [Text Word] OR CVA (Cerebrovascular Accident) [Text Word] OR Vascular Accident, Brain [Text Word] OR Cerebrovascular Apoplexy [Text Word] OR Cerebral Stroke [Text Word] OR Stroke, Acute [Text Word] OR Cerebrovascular Accident, Acute [Text Word] OR Acute Cerebrovascular Accident [Text Word] OR Apoplexy, Cerebrovascular [Text Word]) AND (Cohort Studies [MeSH term] OR Cohort Study [Text Word] OR Studies, Cohort [Text Word] OR Study, Cohort [Text Word] OR Concurrent Studies [Text Word] OR Studies, Concurrent [Text Word] OR Closed Cohort Studies [Text Word] OR Closed Cohort Study [Text Word] OR Study, Closed Cohort [Text Word] OR Cohort Analysis [Text Word] OR Cohort Analysis [Text Word] OR Prospective Studies [Text Word] OR Prospective Study [Text Word] OR Studies, Prospective [Text Word])
