# Supplementary material for: Association of magnesium intake with type 2 diabetes and total stroke: an updated systematic review and meta-analysis
Source: PubMed Central journal article supplement — BMJ Open. 2020 Mar 19;10(3):e032240. doi: 10.1136/bmjopen-2019-032240 (PMC7103847; doi:10.1136/bmjopen-2019-032240), 2020-03-19
Supplement: bmjopen-2019-032240supp004.pdf [file bmjopen-2019-032240supp004.pdf]

**Table S4.** Summary of Baseline Characteristics of the Included Studies

| Source                         | Nation   | Period                       | Population                  | BMI          | Dietary Assessment | Case Ascertainment                               | Case (Cohort size)                             | Magnesium intake (mg/day)<br>highest VS. the lowest<br>[Adjusted RR (95% CI)] |
|--------------------------------|----------|------------------------------|-----------------------------|--------------|--------------------|--------------------------------------------------|------------------------------------------------|-------------------------------------------------------------------------------|
| Salmeron 1997 <sup>11</sup>    | USA      | 1986-1992                    | M; 40-75 y                  | 25.5         | validated SFFQ     | self-reported questionnaire                      | 523 T2D (42759)                                | 461 VS. 262 (0.72 (0.54-0.96))                                                |
| Salmeron 1997(2) <sup>12</sup> | USA      | 1986-1992                    | F; 40-65 y                  | 25.1         | validated SFFQ     | self-reported questionnaire                      | 915 T2D (65173)                                | 338 VS. 222 (0.62 (0.50-0.78))                                                |
| Ascherio 1998 <sup>13</sup>    | USA      | 1986-1994                    | M; 40-75 y                  | NA           | validated FFQ      | self-reported questionnaire                      | 328 stroke (43738)                             | 425 VS. 243 (0.92 (0.58-1.46))                                                |
| Iso 1999 <sup>14</sup>         | USA      | 1980-1994                    | F; 34-59 y                  | 22.7         | FFQ                | self-reported questionnaire                      | 690 stroke (85764)                             | 381 VS. 211 (0.80 (0.63-1.01))                                                |
| Kao 1999 <sup>15</sup>         | USA      | NA                           | M/F; 45-64 y                | 27.2         | FFQ                | self-reported questionnaire                      | black: 367 T2D (2622)<br>white: 739 T2D (9506) | 374 VS. 264 (0.95 (0.52-1.74))<br>418 VS. 308 (0.80 (0.56-1.14))              |
| Liu 2000 <sup>16</sup>         | USA      | 1976-1984                    | F; 38-63 y                  | 24.8         | validated FFQ      | self-reported questionnaire                      | 1879 T2D (75521)                               | 342 VS. 248 (0.75 (0.63-0.89))                                                |
| Meyer 2000 <sup>17</sup>       | USA      | 1986-1992                    | F; 55-69 y                  | 26.8         | validated FFQ      | self-reported questionnaire                      | 1141 T2D (35998)                               | 362 VS. 220 (0.67 (0.55-0.82))                                                |
| Hodge 2004 <sup>18a</sup>      | multiple | 1990-1994                    | M/F; 45-64 y                | 26.1         | validated FFQ      | self-reported questionnaire                      | 365 T2D (31641)                                | 500 increment per day                                                         |
| Lopez 2004 <sup>19</sup>       | USA      | M: 1986-1998<br>W: 1980-1998 | M; 40-75 y<br>F; 30-35 y    | 25.4<br>24.3 | validated SFFQ     | self-reported questionnaire                      | 1333 T2D (42872)<br>4085 T2D (85060)           | 457 VS. 314 (0.72 (0.58-0.89))<br>373 VS. 222 (0.73 (0.65-0.82))              |
| Song 2004 <sup>20</sup>        | USA      | 1993-2001                    | F; $\geq 45$ y <sup>c</sup> | 26           | SFFQ               | self-reported questionnaire                      | 918 T2D (38025)                                | 433 VS. 255 (0.89 (0.71-1.10))                                                |
| Song 2005 <sup>21</sup>        | USA      | 1993-2003                    | F; 39-89 y                  | 26           | FFQ                | follow-up examination                            | 368 stroke (39876)                             | 433 VS. 255 (0.90 (0.65-1.26))                                                |
| Liu 2006 <sup>22</sup>         | USA      | 1996-2006                    | F; 47-63 y                  | 25.8         | validated SFFQ     | self-reported questionnaire                      | 1603 T2D (37183)                               | 340 VS. 307 (0.80 (0.67-0.95))                                                |
| Pereira 2006 <sup>23</sup>     | USA      | 1986-1997                    | F; 56-66 y                  | 26.7         | validated FFQ      | self-reported questionnaire                      | 1418 T2D (28812)                               | 334 VS. 281 (0.78(0.61-1.01))                                                 |
| Pittas 2006 <sup>24</sup>      | USA      | 1980-2000                    | F; 30-55 y                  | 24.1         | validated SFFQ     | self-reported questionnaire                      | 4843 T2D (83779)                               | 352 VS. 258 (0.74 (0.67-0.82))                                                |
| Van 2006 <sup>25</sup>         | multiple | 1995-2003                    | F; 21-69 y                  | 27.6         | validated FFQ      | self-reported questionnaire                      | 1964 T2D (41186)                               | 244 VS. 115 (0.65 (0.54-0.78))                                                |
| Schulze2007 <sup>26</sup>      | multiple | 1994-2005                    | M/F; 35-65 y                | 26.1         | validated SFFQ     | self-reported questionnaire                      | 844 T2D (25067)                                | 377 VS. 268 (0.99 (0.78-1.26))                                                |
| Larsson 2008 <sup>27</sup>     | Sweden   | 1985-2004                    | M; 50-69 y                  | 26.4         | validated FFQ      | follow-up examination                            | 3370 stroke (26556)                            | 575 VS. 382 (0.91 (0.77-1.07))                                                |
| Weng 2008 <sup>28</sup>        | Taipei   | 1989-2002                    | M/F; $\geq 40$ y            | 24.5         | validated FFQ      | Self-reported and<br>cross-checked questionnaire | 132 ischemic stroke (1772)                     | 423 VS. 162 (0.69 (0.45-1.06))                                                |
| Kirii 2009 <sup>29</sup>       | Japan    | 1993-1998                    | M; 40-69 y<br>F; 40-69 y    | 23.6<br>23.5 | FFQ                | self-reported questionnaire                      | 634 T2D (25876)<br>480 T2D (33919)             | 331 VS. 245 (0.93 (0.71-1.22))<br>314 VS. 248 (0.76 (0.56-1.03))              |
| Ohira 2009 <sup>30</sup>       | USA      | 1987-2004                    | M/F; 45-64 y                | 27.4         | validated FFQ      | follow-up examination                            | 577 ischemic stroke (14221)                    | 362 VS. 152 (0.80 (0.75-1.13))                                                |
| Villegas 2009 <sup>31</sup>    | China    | 2000-2006                    | F; 40-70 y                  | 23.8         | validated FFQ      | follow-up examination                            | 2273 T2D (64191)                               | 318 VS. 214 (0.80 (0.68-0.93))                                                |
| Hopping 2010 <sup>32</sup>     | multiple | 1993-2007                    | M; 45-75 y<br>F; 45-75 y    | NA           | validated FFQ      | self-reported questionnaire                      | 4555 T2D (36256)<br>4032 T2D (39256)           | 278 VS. 86 (0.77 (0.70-0.85))<br>300 VS. 93 (0.84 (0.76-0.93))                |
| Kim 2010 <sup>33</sup>         | USA      | 1985-2005                    | M/F; 18-30 y                | 24.5         | validated DHQ      | self-reported questionnaire                      | 330 T2D (4497)                                 | 302 VS. 182 (0.53 (0.32-0.86))                                                |

|                                 |            |                        |                          |              |                              |                                                          |                                            |                                                                  |
|---------------------------------|------------|------------------------|--------------------------|--------------|------------------------------|----------------------------------------------------------|--------------------------------------------|------------------------------------------------------------------|
| Kirii 2010 <sup>34</sup>        | Japan      | NA                     | M/F; 40-65 y             | 22.9         | validated FFQ                | self-reported questionnaire                              | 459 T2D (17592)                            | 303 VS. 158 (0.64 (0.44-0.94))                                   |
| Nanri 2010 <sup>35</sup>        | Japan      | 1990-1995              | M; 40-65 y<br>F; 40-65 y | NA           | validated FFQ                | self-reported questionnaire                              | 634 T2D (25872)<br>480 T2D (33919)         | 348 VS. 213 (0.86 (0.63-1.16))<br>333 VS. 213 (0.92 (0.66-1.28)) |
| Larsson 2011 <sup>36</sup>      | Sweden     | 1998-2008              | F; 49-83 y               | 25           | validated FFQ                | follow-up examination                                    | 1680 stroke (34670)                        | 373 VS. 297 (1.02 (0.82-1.27))                                   |
| Weng 2012 <sup>37</sup>         | Taipei     | 1993-2002              | M/F; ≥30 y               | 24           | validated FFQ                | follow-up examination or<br>self-reported questionnaire  | 141 T2D (1604)                             | 406 VS. 212 (0.44 (0.25-0.75))                                   |
| Zhang 2012 <sup>38</sup>        | Japan      | 1988-2006/             | M; 40-79 y<br>F; 40-79 y | 22.7<br>22.9 | validated FFQ                | follow-up examination                                    | 634 stroke (23083)<br>620 stroke (35533)   | 294 VS. 173 (1.03 (0.79-1.35))<br>274 VS. 175 (0.90 (0.69-1.16)) |
| Hata 2013 <sup>39</sup>         | Japan      | 1988-2009              | M/F; 40-79 y             | 22.9         | validated SFFQ               | self-reported questionnaire                              | 417 T2D (1999)                             | 215 VS. 133 (0.63 (0.44-0.90))                                   |
| Lin 2013 <sup>40</sup>          | Taipei     | 1989-2002              | M/F; ≥ 18 y              | 23.3         | validated FFQ                | follow-up examination and<br>self-reported questionnaire | 123 stroke (2061)                          | 378 VS. 210 (0.62 (0.40-0.97))                                   |
| Oba 2013 <sup>41</sup>          | Japan      | 1990-2000              | M; 40-69 y<br>F; 40-69 y | 23.6<br>23.5 | validated FFQ                | self-reported questionnaire                              | 690 T2D (27769)<br>500 T2D (36864)         | 349 VS. 232 (0.84 (0.69-1.05))<br>356 VS. 211 (0.69 (0.54-0.88)) |
| Sluijs 2013 <sup>42</sup>       | Netherland | NA                     | M/F; 21-70 y             | NA           | FFQ                          | NA                                                       | 361 ischemic stroke (36359)                | 435 VS. 253 (0.76 (0.57-1.01))                                   |
| Hruby 2014 <sup>43</sup>        | USA        | 1995-2001              | M/F; 26-81 y             | 27           | validated FFQ                | self-reported questionnaire                              | 179 T2D (2582)                             | 395 VS. 235 (0.49 (0.27-0.88))                                   |
| Sluijs 2014 <sup>44</sup>       | Netherland | NA                     | M/F; 21-70 y             | NA           | FFQ                          | follow-up examination                                    | 631 stroke (36094)                         | 597 VS. 190 (0.64 (0.44-0.94))                                   |
| Adebamowo 2015 <sup>45</sup>    | USA        | 1986-2010              | M; 40-75 y               | 25.4         | validated FFQ                | self-reported questionnaire                              | 1547 stroke (42669)                        | 467 VS. 267 (0.89 (0.71-1.11))                                   |
| Adebamowo 2015(2) <sup>46</sup> | USA        | 1976-2006<br>1989-2011 | F; 30-55 y<br>F; 25-42 y | 26.4<br>25.7 | validated FFQ                | self-reported questionnaire                              | 3237 stroke (86149)<br>543 stroke (94715)  | 411 VS. 233 (0.93 (0.79-1.08))                                   |
| Bain 2015 <sup>47</sup>         | Britain    | 2002-2008              | M; 40-75 y<br>F; 40-75 y | 26.5<br>26.2 | 7-day diary recall           | follow-up examination                                    | 364 stroke (2000)<br>511 stroke (2445)     | 456 VS. 266 (0.81 (0.53-1.22))<br>374 VS. 456 (0.82 (0.54-1.24)) |
| Huang 2015 <sup>48</sup>        | Taipei     | 2000-2008              | M/F; ≥65 y               | NA           | 24 h dietary recall and SFFQ | follow-up examination                                    | 231 T2D (1400)                             | 398 VS. 103 (0.59 (0.26-1.33))                                   |
| Hruby 2017 <sup>49</sup>        | USA        | 1984-2012              | F; 30-55 y               | 24.8         |                              |                                                          | 7620 T2D (69176)                           | 390 VS. 229 (0.80 (0.73-0.88))                                   |
|                                 |            | 1991-2013              | F; 25-42 y               | 24.6         | validated SFFQ               | self-reported questionnaire                              | 6080 T2D (91471)                           | 424 VS. 249 (0.89 (0.81-0.99))                                   |
|                                 |            | 1986-2012              | M; mean 53.5 y           | 24.8         |                              |                                                          | 3430 T2D (42096)                           | 469 VS. 280 (0.88 (0.77-1.00))                                   |
| Kokubo 2017 <sup>50b</sup>      | Japan      | 1990-2009<br>1993-2010 | M; 40-69 y<br>F; 40-69 y | 23.6<br>23.6 | FFQ                          | follow-up examination                                    | 2576 stroke (39505)<br>1846 stroke (45788) | 348 VS. 213 (1.07 (0.86-1.33))<br>333 VS. 213 (0.88 (0.67-1.14)) |
| Konishi 2017 <sup>51</sup>      | Japan      | 1992-2002              | M; ≥35 y<br>F; ≥35 y     | 22.6<br>22.1 | validated FFQ                | self-reported questionnaire                              | 266 T2D (5885)<br>172 T2D (7640)           | 469 VS. 310 (1.13 (0.76-1.70))<br>432 VS. 285 (0.50 (0.30-0.84)) |

Abbreviations: FFQ, food-frequency questionnaire; SFFQ, semi-quantitative food-frequency questionnaire; BMI, body mass index; T2D, type 2 diabetes; NA, not available.

<sup>a</sup>, different ethnicities of participants are in multiple nations cohort;

<sup>b</sup>, the dose of magnesium intake which is not available in this study is retrieved from the same cohort reported in former publication;

<sup>c</sup> the range of enrolled participants age is not mentioned.
