# Supplementary material for: Association of magnesium intake with type 2 diabetes and total stroke: an updated systematic review and meta-analysis
Source: PubMed Central journal article supplement — BMJ Open. 2020 Mar 19;10(3):e032240. doi: 10.1136/bmjopen-2019-032240 (PMC7103847; doi:10.1136/bmjopen-2019-032240), 2020-03-19
Supplement: bmjopen-2019-032240supp005.pdf [file bmjopen-2019-032240supp005.pdf]

**Table S5.** Methodological Quality Assessments of the Included Studies with Newcastle-Ottawa Scales

|      | Study                             | Selection      |                   |                           |                     | Comparability | Outcome               |                     |                       | Total score |
|------|-----------------------------------|----------------|-------------------|---------------------------|---------------------|---------------|-----------------------|---------------------|-----------------------|-------------|
|      |                                   | Exposed cohort | Nonexposed cohort | Ascertainment of exposure | Outcome of interest |               | Assessment of outcome | Length of follow-up | Adequacy of follow-up |             |
| 1997 | Salmeron et al, <sup>11</sup>     | *              | *                 | *                         | *                   | **            | *                     | *                   |                       | 9           |
| 1997 | Salmeron et al (2), <sup>12</sup> | *              | *                 | *                         | *                   | **            | *                     | *                   | *                     | 9           |
| 1998 | Ascherio et al, <sup>13</sup>     | *              | *                 | *                         | *                   | **            | *                     | *                   | *                     | 9           |
| 1999 | Iso et al, <sup>14</sup>          | *              | *                 | *                         | *                   | **            | *                     | *                   | *                     | 9           |
| 1999 | Kao et al, <sup>15</sup>          | *              | *                 | *                         | *                   | **            | *                     | *                   | *                     | 9           |
| 2000 | Liu et al, <sup>16</sup>          | *              | *                 | *                         | *                   | **            | *                     | *                   | *                     | 9           |
| 2000 | Meyer et al, <sup>17</sup>        | *              | *                 | *                         | *                   | **            | *                     | *                   | *                     | 9           |
| 2004 | Hodge et al, <sup>18</sup>        | *              | *                 | *                         | *                   | *             | *                     | *                   |                       | 7           |
| 2004 | Lopez et al, <sup>19</sup>        | *              | *                 | *                         | *                   | **            | *                     | *                   | *                     | 9           |
| 2004 | Song et al, <sup>20</sup>         | *              | *                 | *                         | *                   | **            | *                     | *                   | *                     | 9           |
| 2005 | Song et al, <sup>21</sup>         | *              | *                 | *                         | *                   | **            | *                     | *                   | *                     | 9           |
| 2006 | Liu et al, <sup>22</sup>          | *              | *                 | *                         | *                   | **            | *                     | *                   | *                     | 9           |
| 2006 | Pereira et al, <sup>23</sup>      | *              | *                 | *                         | *                   | **            | *                     | *                   | *                     | 9           |
| 2006 | Pittas et al, <sup>24</sup>       | *              | *                 | *                         | *                   | **            | *                     | *                   | *                     | 9           |
| 2006 | Van et al, <sup>25</sup>          | *              | *                 | *                         | *                   | **            | *                     | *                   | *                     | 9           |
| 2007 | Schulze et al, <sup>26</sup>      | *              | *                 | *                         | *                   | **            | *                     | *                   | *                     | 9           |
| 2008 | Larsson et al, <sup>27</sup>      | *              | *                 | *                         | *                   | **            | *                     | *                   | *                     | 9           |
| 2008 | Weng et al, <sup>28</sup>         | *              | *                 | *                         | *                   | **            | *                     | *                   | *                     | 9           |
| 2009 | Kirii et al, <sup>29</sup>        | *              | *                 | *                         | *                   | **            | *                     | *                   | *                     | 9           |
| 2009 | Ohira et al, <sup>30</sup>        | *              | *                 | *                         | *                   | **            | *                     | *                   | *                     | 9           |
| 2009 | Villegas et al, <sup>31</sup>     | *              | *                 | *                         | *                   | **            | *                     | *                   | *                     | 9           |
| 2010 | Hopping et al, <sup>32</sup>      | *              | *                 | *                         | *                   | **            | *                     | *                   | *                     | 9           |
| 2010 | Kim et al, <sup>33</sup>          | *              | *                 | *                         | *                   | **            | *                     | *                   | *                     | 8           |
| 2010 | Kirii et al, <sup>34</sup>        | *              | *                 | *                         | *                   | **            | *                     | *                   | *                     | 9           |
| 2010 | Nanri et al, <sup>35</sup>        | *              | *                 | *                         | *                   | **            | *                     | *                   | *                     | 9           |
| 2011 | Larsson et al, <sup>36</sup>      | *              | *                 | *                         | *                   | **            | *                     | *                   | *                     | 9           |
| 2012 | Weng et al, <sup>37</sup>         | *              | *                 | *                         | *                   | **            | *                     | *                   |                       | 8           |

|      |                                    |   |   |   |   |    |   |   |   |   |
|------|------------------------------------|---|---|---|---|----|---|---|---|---|
| 2012 | Zhang et al, <sup>38</sup>         | * | * | * | * | ** | * | * | * | 9 |
| 2013 | Hata et al, <sup>39</sup>          | * | * | * | * | ** | * | * | * | 9 |
| 2013 | Lin et al, <sup>40</sup>           | * | * | * | * | ** | * | * | * | 9 |
| 2013 | Oba et al, <sup>41</sup>           | * | * | * | * | ** | * | * | * | 9 |
| 2013 | Sluijs et al, <sup>42</sup>        | * | * | * | * | ** |   | * | * | 8 |
| 2014 | Hruby et al, <sup>43</sup>         | * | * | * | * | ** | * | * | * | 9 |
| 2014 | Sluijs et al, <sup>44</sup>        | * | * | * | * | ** | * | * | * | 9 |
| 2015 | Adebamowo et al, <sup>45</sup>     | * | * | * | * | ** | * | * | * | 9 |
| 2015 | Adebamowo et al (2), <sup>46</sup> | * | * | * | * | ** | * | * | * | 9 |
| 2015 | Bain et al, <sup>47</sup>          | * | * | * | * | ** | * | * | * | 9 |
| 2015 | Huang et al, <sup>48</sup>         | * | * | * |   | ** | * | * | * | 8 |
| 2017 | Hruby et al, <sup>49</sup>         | * | * | * | * | ** | * | * | * | 9 |
| 2017 | Kokubo et al, <sup>50</sup>        | * | * | * | * | ** | * | * | * | 9 |
| 2017 | Konishi et al, <sup>51</sup>       | * | * | * | * | *  | * | * | * | 9 |
