# Supplementary material for: Association of magnesium intake with type 2 diabetes and total stroke: an updated systematic review and meta-analysis
Source: PubMed Central journal article supplement — BMJ Open. 2020 Mar 19;10(3):e032240. doi: 10.1136/bmjopen-2019-032240 (PMC7103847; doi:10.1136/bmjopen-2019-032240), 2020-03-19
Supplement: bmjopen-2019-032240supp012.pdf [file bmjopen-2019-032240supp012.pdf]

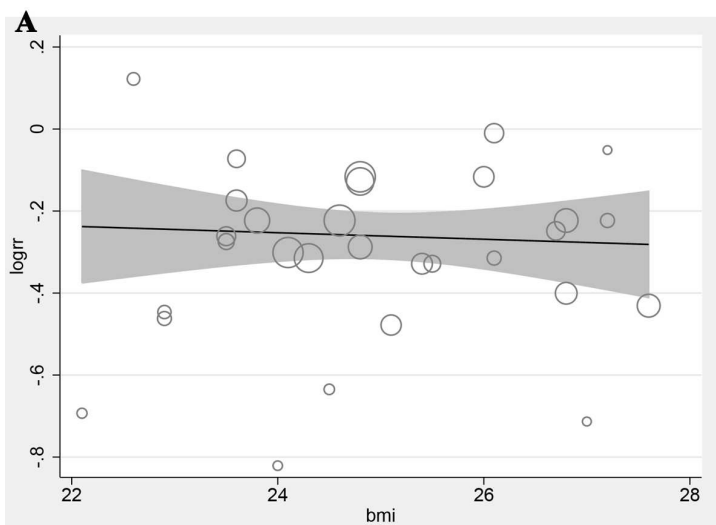

**B**

```
. tabulate sex, generate ( sexnew)
```

| sex                  | Freq. | Percent | Cum.   |
|----------------------|-------|---------|--------|
| both male and female | 10    | 28.57   | 28.57  |
| female               | 17    | 48.57   | 77.14  |
| male                 | 8     | 22.86   | 100.00 |
| Total                | 35    | 100.00  |        |

```
. metareg logrr sexnew1 sexnew2 sexnew3, wsse (selogrr) knapphartung reml
note: sexnew3 dropped because of collinearity
```

Meta-regression

|                                                |               |   |         |
|------------------------------------------------|---------------|---|---------|
| REML estimate of between-study variance        | tau2          | = | .004692 |
| % residual variation due to heterogeneity      | I-squared_res | = | 36.58%  |
| Proportion of between-study variance explained | Adj R-squared | = | -26.08% |
| Joint test for all covariates                  | Model F(2,32) | = | 1.31    |
| With Knapp-Hartung modification                | Prob > F      | = | 0.2841  |

| logrr   | Coef.     | Std. Err. | t     | P> t  | [95% Conf. Interval] |
|---------|-----------|-----------|-------|-------|----------------------|
| sexnew1 | -.1314075 | .0857784  | -1.53 | 0.135 | -.3061323 .0433174   |
| sexnew2 | -.0630804 | .0541113  | -1.17 | 0.252 | -.1733016 .0471407   |
| _cons   | -.1956565 | .0461514  | -4.24 | 0.000 | -.2896637 -.1016492  |

**C**

```
. tabulate participantsregion, generate ( participantsregionnew)
```

| participantsregion | Freq. | Percent | Cum.   |
|--------------------|-------|---------|--------|
| Asia               | 13    | 37.14   | 37.14  |
| Multiple nations   | 5     | 14.29   | 51.43  |
| North America      | 17    | 48.57   | 100.00 |
| Total              | 35    | 100.00  |        |

```
. metareg logrr participantsregionnew1 participantsregionnew2 participantsregionnew3, wsse (selogrr) knapphartung reml
note: participantsregionnew1 dropped because of collinearity
```

Meta-regression

|                                                |               |   |         |
|------------------------------------------------|---------------|---|---------|
| REML estimate of between-study variance        | tau2          | = | .004868 |
| % residual variation due to heterogeneity      | I-squared_res | = | 39.22%  |
| Proportion of between-study variance explained | Adj R-squared | = | -30.80% |
| Joint test for all covariates                  | Model F(2,32) | = | 0.10    |
| With Knapp-Hartung modification                | Prob > F      | = | 0.9047  |

| logrr                  | Coef.     | Std. Err. | t     | P> t  | [95% Conf. Interval] |
|------------------------|-----------|-----------|-------|-------|----------------------|
| participantsregionnew2 | .0027567  | .0731865  | 0.04  | 0.970 | -.1463193 .1518327   |
| participantsregionnew3 | -.0201657 | .0599158  | -0.34 | 0.739 | -.1422102 .1018788   |
| _cons                  | -.2392399 | .0510872  | -4.68 | 0.000 | -.3433012 -.1351786  |

**D**

```
. tabulate dietaryassessment, generate ( dietaryassessmentnew)
```

| dietaryassessment           | Freq. | Percent | Cum.   |
|-----------------------------|-------|---------|--------|
| 24h dietary recall and SFFQ | 1     | 2.86    | 2.86   |
| FFQ                         | 4     | 11.43   | 14.29  |
| SFFQ                        | 1     | 2.86    | 17.14  |
| validated OHQ               | 1     | 2.86    | 20.00  |
| validated FFQ               | 17    | 48.57   | 68.57  |
| validated SFFQ              | 11    | 31.43   | 100.00 |
| Total                       | 35    | 100.00  |        |

```
. metareg logrr dietaryassessmentnew1 dietaryassessmentnew2 dietaryassessmentnew3 dietaryassessmentnew4 dietaryassessmentnew5
> assessmentnew6, wsse (selogrr) knapphartung reml
note: dietaryassessmentnew4 dropped because of collinearity
```

Meta-regression

|                                                |               |   |         |
|------------------------------------------------|---------------|---|---------|
| REML estimate of between-study variance        | tau2          | = | .004259 |
| % residual variation due to heterogeneity      | I-squared_res | = | 38.66%  |
| Proportion of between-study variance explained | Adj R-squared | = | -14.42% |
| Joint test for all covariates                  | Model F(5,29) | = | 0.86    |
| With Knapp-Hartung modification                | Prob > F      | = | 0.5210  |

| logrr                 | Coef.     | Std. Err. | t     | P> t  | [95% Conf. Interval] |
|-----------------------|-----------|-----------|-------|-------|----------------------|
| dietaryassessmentnew1 | .1072455  | .5310922  | 0.20  | 0.841 | -.97896 1.193451     |
| dietaryassessmentnew2 | .4672073  | .296568   | 1.58  | 0.126 | -.1393423 1.073757   |
| dietaryassessmentnew3 | .5183445  | .311752   | 1.66  | 0.107 | -.1192599 1.155949   |
| dietaryassessmentnew5 | .3650754  | .2813784  | 1.30  | 0.205 | -.2104081 .9405589   |
| dietaryassessmentnew6 | .3944872  | .2812621  | 1.40  | 0.171 | -.1807583 .9697328   |
| _cons                 | -.6348783 | .279225   | -2.27 | 0.031 | -1.205958 -.0637991  |
