# Supplementary material for: Association of magnesium intake with type 2 diabetes and total stroke: an updated systematic review and meta-analysis
Source: PubMed Central journal article supplement — BMJ Open. 2020 Mar 19;10(3):e032240. doi: 10.1136/bmjopen-2019-032240 (PMC7103847; doi:10.1136/bmjopen-2019-032240), 2020-03-19
Supplement: bmjopen-2019-032240supp013.pdf [file bmjopen-2019-032240supp013.pdf]

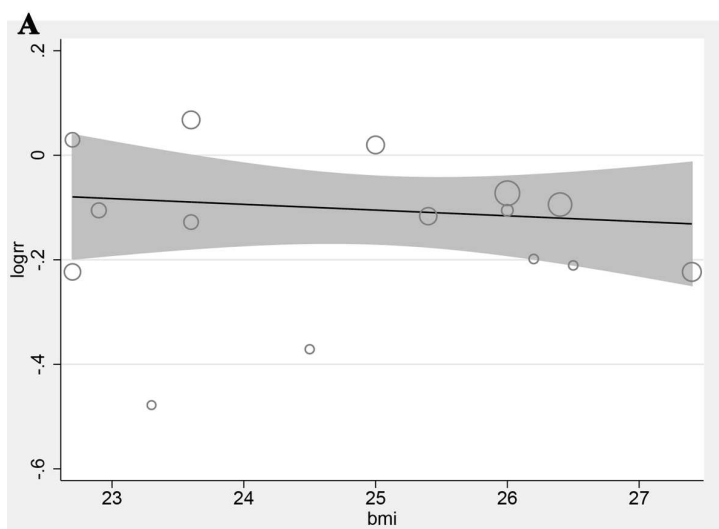

**C**  
 . tabulate participantregion, generate ( participantregionew)  
 participantregion

| participantregion | Freq. | Percent | Cum.   |
|-------------------|-------|---------|--------|
| Asia              | 6     | 33.33   | 33.33  |
| Europe            | 6     | 33.33   | 66.67  |
| North America     | 6     | 33.33   | 100.00 |
| Total             | 18    | 100.00  |        |

. metareg logrr participantregionew1 participantregionew2 participantregionew3, wsse (selogrr) knapphartung reml random  
 note: participantregionew3 dropped because of collinearity

Meta-regression  
 REML estimate of between-study variance tau2 = 0  
 % residual variation due to heterogeneity I-squared\_res = 1.814  
 Proportion of between-study variance explained Adj R-squared = .4  
 Joint test for all covariates Model F(2,15) = 0.32  
 With Knapp-Hartung modification Prob > F = 0.7332

| logrr                | Coef.     | Std. Err. | t     | P> t  | [95% Conf. Interval] |
|----------------------|-----------|-----------|-------|-------|----------------------|
| participantregionew1 | .0566278  | .0763754  | 0.74  | 0.470 | -.1061625 .2194181   |
| participantregionew2 | .0028959  | .0725841  | 0.04  | 0.969 | -.1518136 .1576053   |
| _cons                | -.1370955 | .0476962  | -2.87 | 0.012 | -.2387575 -.0354336  |

**B**  
 . tabulate sex, generate (sexnew)

| sex                  | Freq. | Percent | Cum.   |
|----------------------|-------|---------|--------|
| both male and female | 3     | 20.00   | 20.00  |
| female               | 7     | 46.67   | 66.67  |
| male                 | 5     | 33.33   | 100.00 |
| Total                | 15    | 100.00  |        |

. metareg logrr sexnew1 sexnew2 sexnew3, wsse (selogrr) knapphartung reml  
 note: sexnew1 dropped because of collinearity

Meta-regression  
 REML estimate of between-study variance tau2 = 0  
 % residual variation due to heterogeneity I-squared\_res = 0.00%  
 Proportion of between-study variance explained Adj R-squared = .%  
 Joint test for all covariates Model F(2,12) = 2.64  
 With Knapp-Hartung modification Prob > F = 0.1120

| logrr   | Coef.     | Std. Err. | t     | P> t  | [95% Conf. Interval] |
|---------|-----------|-----------|-------|-------|----------------------|
| sexnew2 | .1870375  | .0983982  | 1.90  | 0.082 | -.0273537 .4014286   |
| sexnew3 | .2312472  | .1011998  | 2.29  | 0.041 | .0107518 .4517427    |
| _cons   | -.2844281 | .0870478  | -3.27 | 0.007 | -.4740889 -.0947673  |

**D**  
 . tabulate dietaryassessment, generate ( dietaryassessmentnew)

| dietaryassessment  | Freq. | Percent | Cum.   |
|--------------------|-------|---------|--------|
| 7-day diary recall | 2     | 11.11   | 11.11  |
| FFQ                | 6     | 33.33   | 44.44  |
| validated FFQ      | 9     | 50.00   | 94.44  |
| validated SFFQ     | 1     | 5.56    | 100.00 |
| Total              | 18    | 100.00  |        |

. metareg logrr dietaryassessmentnew1 dietaryassessmentnew2 dietaryassessmentnew3 dietaryassessmentnew4, wsse (selogrr) knapphartung > reml  
 note: dietaryassessmentnew1 dropped because of collinearity

Meta-regression  
 REML estimate of between-study variance tau2 = 0  
 % residual variation due to heterogeneity I-squared\_res = 8.20%  
 Proportion of between-study variance explained Adj R-squared = .4  
 Joint test for all covariates Model F(3,14) = 0.21  
 With Knapp-Hartung modification Prob > F = 0.8911

| logrr                 | Coef.     | Std. Err. | t     | P> t  | [95% Conf. Interval] |
|-----------------------|-----------|-----------|-------|-------|----------------------|
| dietaryassessmentnew2 | .0596066  | .167476   | 0.36  | 0.727 | -.2995937 .418807    |
| dietaryassessmentnew3 | .0984932  | .1616344  | 0.61  | 0.552 | -.2481781 .4451645   |
| dietaryassessmentnew4 | .1211865  | .291519   | 0.42  | 0.684 | -.5040595 .7464325   |
| _cons                 | -.2045681 | .1567379  | -1.31 | 0.213 | -.5407374 .1316013   |
