# Supplementary material for: Association of magnesium intake with type 2 diabetes and total stroke: an updated systematic review and meta-analysis
Source: PubMed Central journal article supplement — BMJ Open. 2020 Mar 19;10(3):e032240. doi: 10.1136/bmjopen-2019-032240 (PMC7103847; doi:10.1136/bmjopen-2019-032240), 2020-03-19
Supplement: bmjopen-2019-032240supp014.pdf [file bmjopen-2019-032240supp014.pdf]

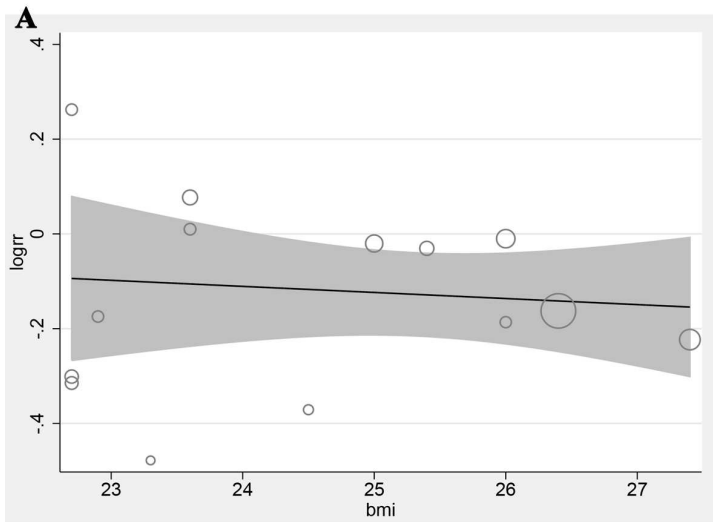

**B** tabulate sex, generate ( sexnew)

| sex                  | Freq. | Percent | Cum.   |
|----------------------|-------|---------|--------|
| both male and female | 4     | 26.67   | 26.67  |
| female               | 7     | 46.67   | 73.33  |
| male                 | 4     | 26.67   | 100.00 |
| Total                | 15    | 100.00  |        |

. metareg logrr sexnew1 sexnew2 sexnew3, wsse (selogrr) knapphartung reml  
note: sexnew3 dropped because of collinearity

Meta-regression  
REML estimate of between-study variance tau2 = .004782  
% residual variation due to heterogeneity I-squared\_res = 1.79%  
Proportion of between-study variance explained Adj R-squared = .%  
Joint test for all covariates Model F(2,12) = 2.39  
With Knapp-Hartung modification Prob > F = 0.1339

| logrr   | Coef.     | Std. Err. | t     | P> t  | [95% Conf. Interval] |
|---------|-----------|-----------|-------|-------|----------------------|
| sexnew1 | -.2383161 | .109578   | -2.17 | 0.050 | -.4770662 .0004339   |
| sexnew2 | -.0739192 | .0940187  | -0.79 | 0.447 | -.2787683 .1309299   |
| _cons   | -.048002  | .0681983  | -0.70 | 0.495 | -.1965933 .1005894   |

**C** . tabulate participantsregion, generate ( participantsregionnew)

| participantsregion | Freq. | Percent | Cum.   |
|--------------------|-------|---------|--------|
| Asia               | 6     | 40.00   | 40.00  |
| Europe             | 3     | 20.00   | 60.00  |
| North America      | 6     | 40.00   | 100.00 |
| Total              | 15    | 100.00  |        |

. metareg logrr participantsregionnew1 participantsregionnew2 participantsregionnew3, wsse (selogrr) knapphartung reml  
note: participantsregionnew3 dropped because of collinearity

Meta-regression  
REML estimate of between-study variance tau2 = .00114  
% residual variation due to heterogeneity I-squared\_res = 21.76%  
Proportion of between-study variance explained Adj R-squared = .%  
Joint test for all covariates Model F(2,12) = 0.56  
With Knapp-Hartung modification Prob > F = 0.5842

| logrr                  | Coef.     | Std. Err. | t     | P> t  | [95% Conf. Interval] |
|------------------------|-----------|-----------|-------|-------|----------------------|
| participantsregionnew1 | .1089103  | .1089661  | 1.01  | 0.335 | -.1271992 .3450197   |
| participantsregionnew2 | .0117202  | .0911749  | 0.13  | 0.900 | -.1869328 .2103732   |
| _cons                  | -.1629514 | .0653255  | -2.49 | 0.028 | -.3052835 -.0206192  |

**D** tabulate dietaryassessment, generate ( dietaryassessmentnew)

| dietaryassessment | Freq. | Percent | Cum.   |
|-------------------|-------|---------|--------|
| FFQ               | 6     | 40.00   | 40.00  |
| validated FFQ     | 9     | 60.00   | 100.00 |
| Total             | 15    | 100.00  |        |

. metareg logrr dietaryassessmentnew1 dietaryassessmentnew2, wsse (selogrr) knapphartung reml  
note: dietaryassessmentnew1 dropped because of collinearity

Meta-regression  
REML estimate of between-study variance tau2 = .001922  
% residual variation due to heterogeneity I-squared\_res = 21.79%  
Proportion of between-study variance explained Adj R-squared = .%  
With Knapp-Hartung modification

| logrr                 | Coef.    | Std. Err. | t     | P> t  | [95% Conf. Interval] |
|-----------------------|----------|-----------|-------|-------|----------------------|
| dietaryassessmentnew2 | .0410573 | .0897444  | 0.46  | 0.655 | -.1528236 .2349382   |
| _cons                 | -.162938 | .0753946  | -2.16 | 0.050 | -.3258182 -.0000578  |
