# Supplementary material for: Association of magnesium intake with type 2 diabetes and total stroke: an updated systematic review and meta-analysis
Source: PubMed Central journal article supplement — BMJ Open. 2020 Mar 19;10(3):e032240. doi: 10.1136/bmjopen-2019-032240 (PMC7103847; doi:10.1136/bmjopen-2019-032240), 2020-03-19
Supplement: bmjopen-2019-032240supp015.pdf [file bmjopen-2019-032240supp015.pdf]

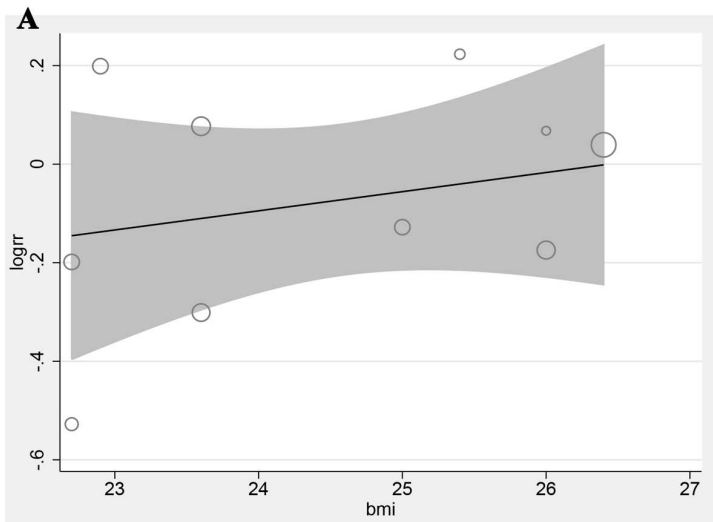

**C**

```
. tabulate participantsregion, generate ( participantsregionew)
```

| participantsregion | Freq. | Percent | Cum.   |
|--------------------|-------|---------|--------|
| Asia               | 4     | 40.00   | 40.00  |
| Europe             | 2     | 20.00   | 60.00  |
| North America      | 4     | 40.00   | 100.00 |
| Total              | 10    | 100.00  |        |

```
. metareg logrr participantsregionew1 participantsregionew2 participantsregionew3, wsse (selogrr) knapphartung reml
note: participantsregionew3 dropped because of collinearity
```

Meta-regression

|                                                |               |   |         |
|------------------------------------------------|---------------|---|---------|
| REML estimate of between-study variance        | tau2          | = | .008035 |
| % residual variation due to heterogeneity      | I-squared_res | = | 15.78%  |
| Proportion of between-study variance explained | Adj R-squared | = | .%      |
| Joint test for all covariates                  | Model F(2,7)  | = | 0.14    |
| With Knapp-Hartung modification                | Prob > F      | = | 0.8726  |

| logrr                 | Coef.     | Std. Err. | t     | P> t  | [95% Conf. Interval] |
|-----------------------|-----------|-----------|-------|-------|----------------------|
| participantsregionew1 | -.0106555 | .1797495  | -0.06 | 0.954 | -.4356955 .4143845   |
| participantsregionew2 | .0796745  | .1944402  | 0.41  | 0.694 | -.3801034 .5394524   |
| _cons                 | -.0943118 | .1371063  | -0.69 | 0.514 | -.4185166 .229893    |

**B**

```
. tabulate sex, generate ( sexnew)
```

| sex    | Freq. | Percent | Cum.   |
|--------|-------|---------|--------|
| female | 6     | 60.00   | 60.00  |
| male   | 4     | 40.00   | 100.00 |
| Total  | 10    | 100.00  |        |

```
. metareg logrr sexnew1 sexnew2, wsse (selogrr) knapphartung reml
note: sexnew2 dropped because of collinearity
```

Meta-regression

|                                                |               |   |       |
|------------------------------------------------|---------------|---|-------|
| REML estimate of between-study variance        | tau2          | = | 0     |
| % residual variation due to heterogeneity      | I-squared_res | = | 0.42% |
| Proportion of between-study variance explained | Adj R-squared | = | .%    |
| With Knapp-Hartung modification                |               |   |       |

| logrr   | Coef.     | Std. Err. | t     | P> t  | [95% Conf. Interval] |
|---------|-----------|-----------|-------|-------|----------------------|
| sexnew1 | -.1120692 | .1333867  | -0.84 | 0.425 | -.4196595 .1955211   |
| _cons   | -.0110753 | .0978042  | -0.11 | 0.913 | -.2366123 .2144617   |

**D**

```
. tabulate dietaryassessment, generate ( dietaryassessmentnew)
```

| dietaryassessment | Freq. | Percent | Cum.   |
|-------------------|-------|---------|--------|
| FFQ               | 4     | 40.00   | 40.00  |
| validated FFQ     | 6     | 60.00   | 100.00 |
| Total             | 10    | 100.00  |        |

```
. metareg logrr dietaryassessmentnew1 dietaryassessmentnew2, wsse (selogrr) knapphartung reml
note: dietaryassessmentnew1 dropped because of collinearity
```

Meta-regression

|                                                |               |   |         |
|------------------------------------------------|---------------|---|---------|
| REML estimate of between-study variance        | tau2          | = | .001097 |
| % residual variation due to heterogeneity      | I-squared_res | = | 6.09%   |
| Proportion of between-study variance explained | Adj R-squared | = | .%      |
| With Knapp-Hartung modification                |               |   |         |

| logrr                 | Coef.    | Std. Err. | t     | P> t  | [95% Conf. Interval] |
|-----------------------|----------|-----------|-------|-------|----------------------|
| dietaryassessmentnew2 | .0642559 | .1426454  | 0.45  | 0.664 | -.2646851 .3931968   |
| _cons                 | -.112665 | .1133825  | -0.99 | 0.349 | -.3741255 .1487955   |
