# Supplementary figures and images for: Association of magnesium intake with type 2 diabetes and total stroke: an updated systematic review and meta-analysis
Source: PubMed Central journal article supplement — BMJ Open. 2020 Mar 19;10(3):e032240. doi: 10.1136/bmjopen-2019-032240 (PMC7103847; doi:10.1136/bmjopen-2019-032240), 2020-03-19

**A** funnel plot with pseudo 95% confidence limits

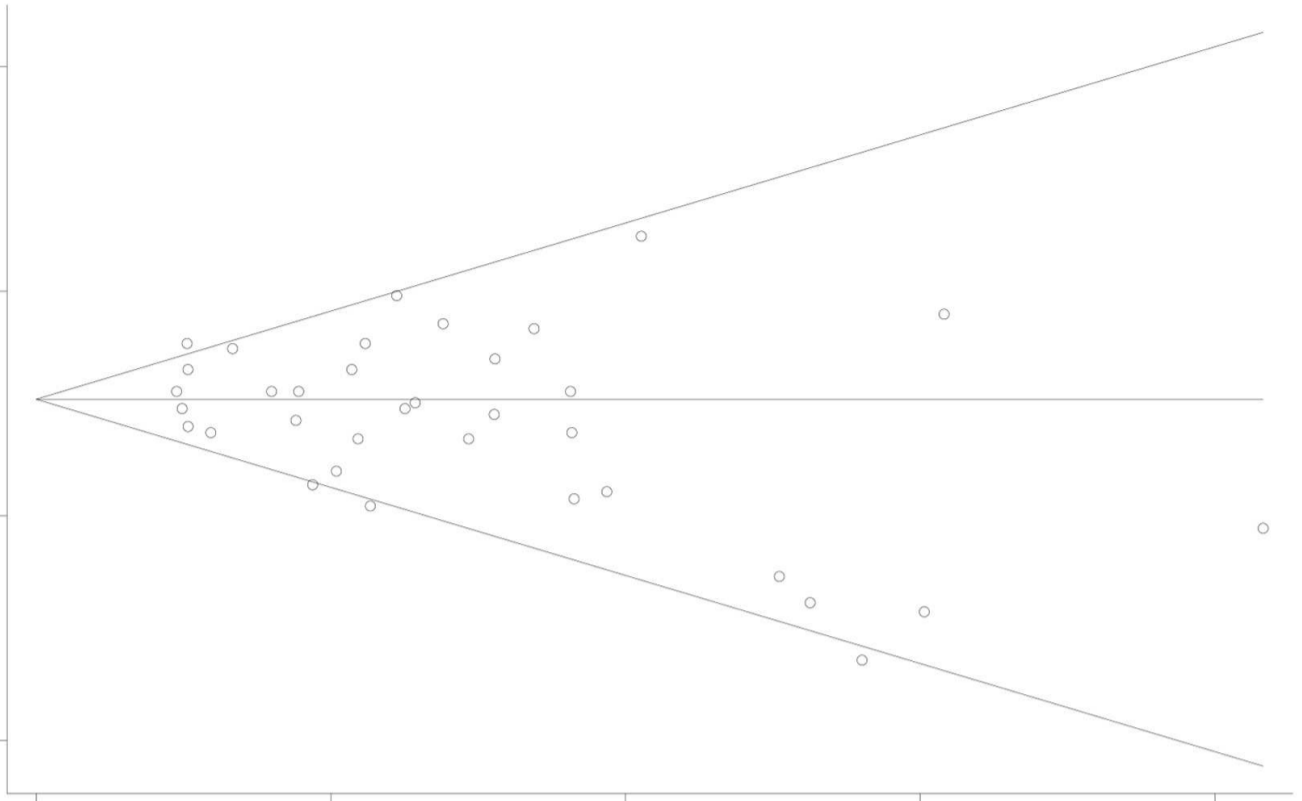

**B**

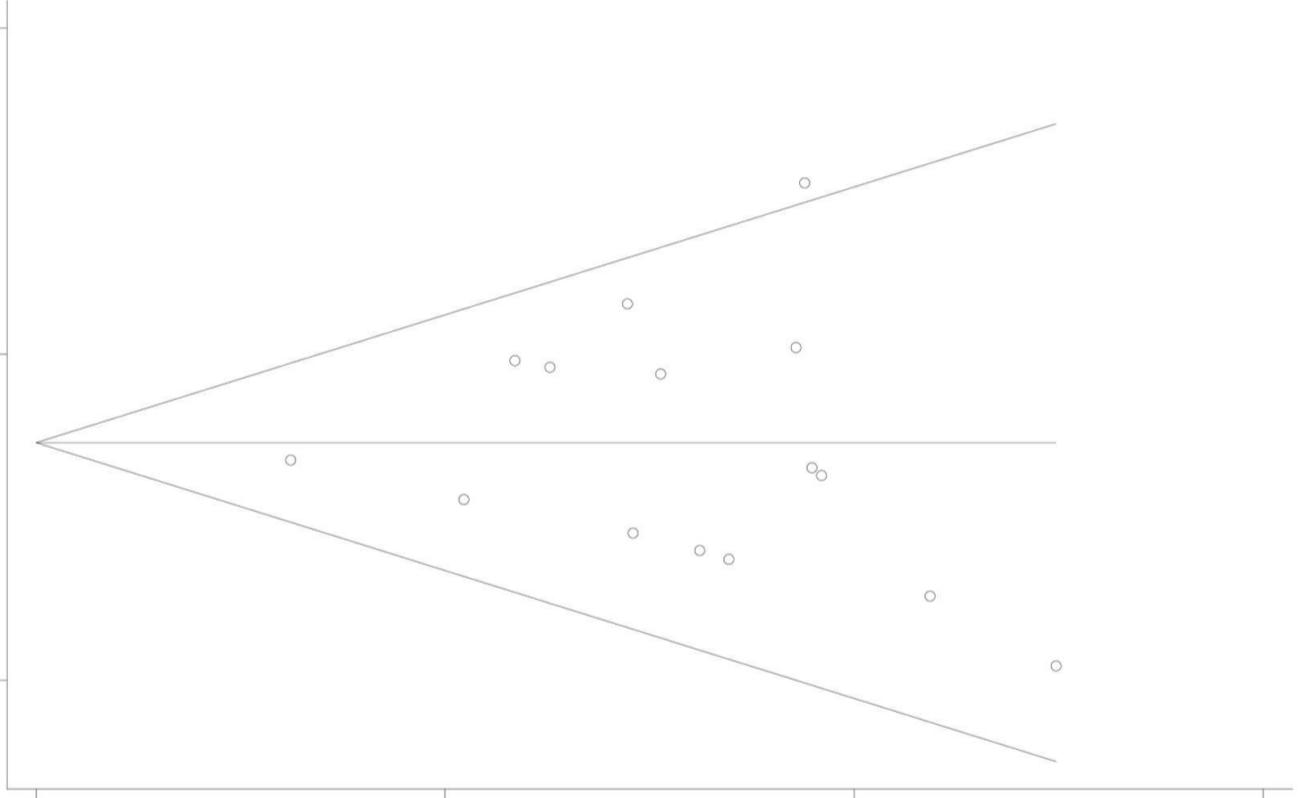

**C**

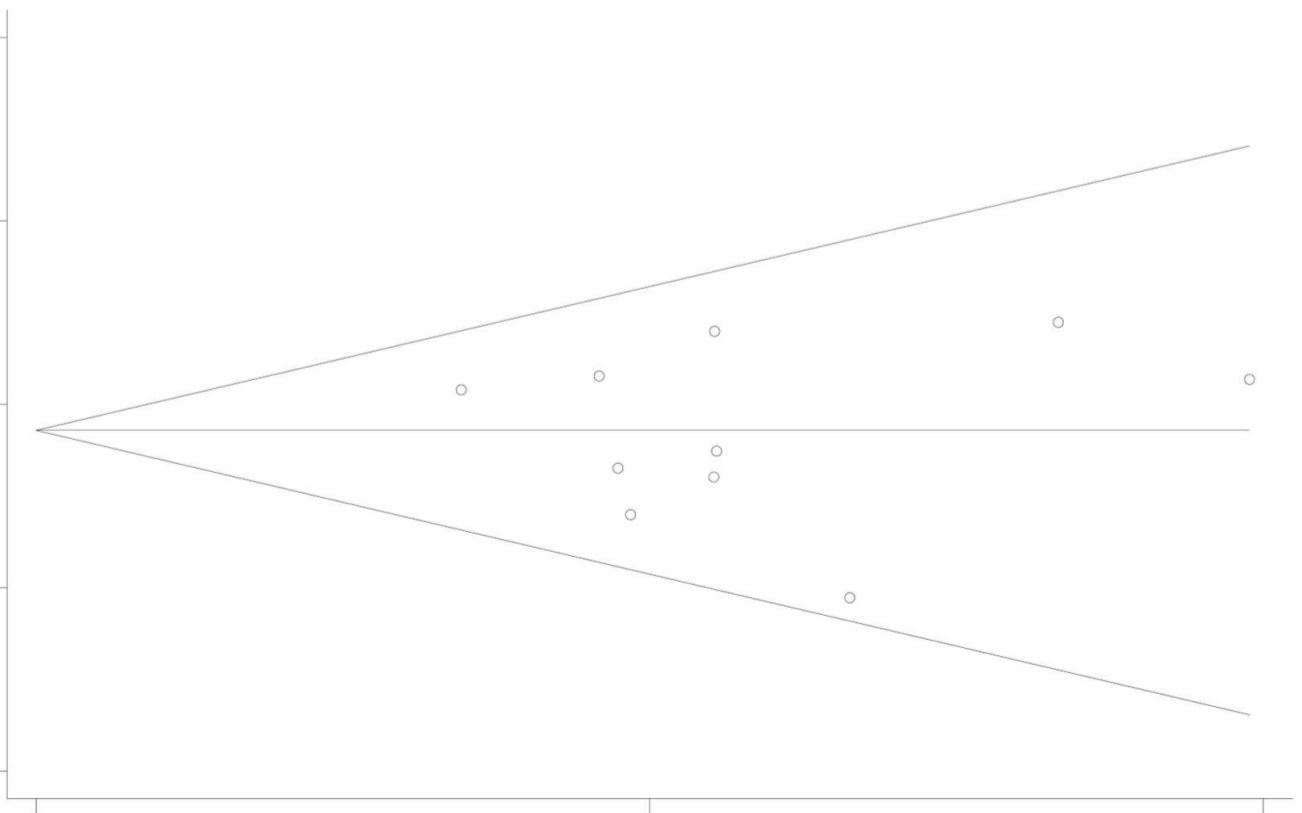

Supplement: bmjopen-2019-032240supp006.pdf [file bmjopen-2019-032240supp006.pdf]

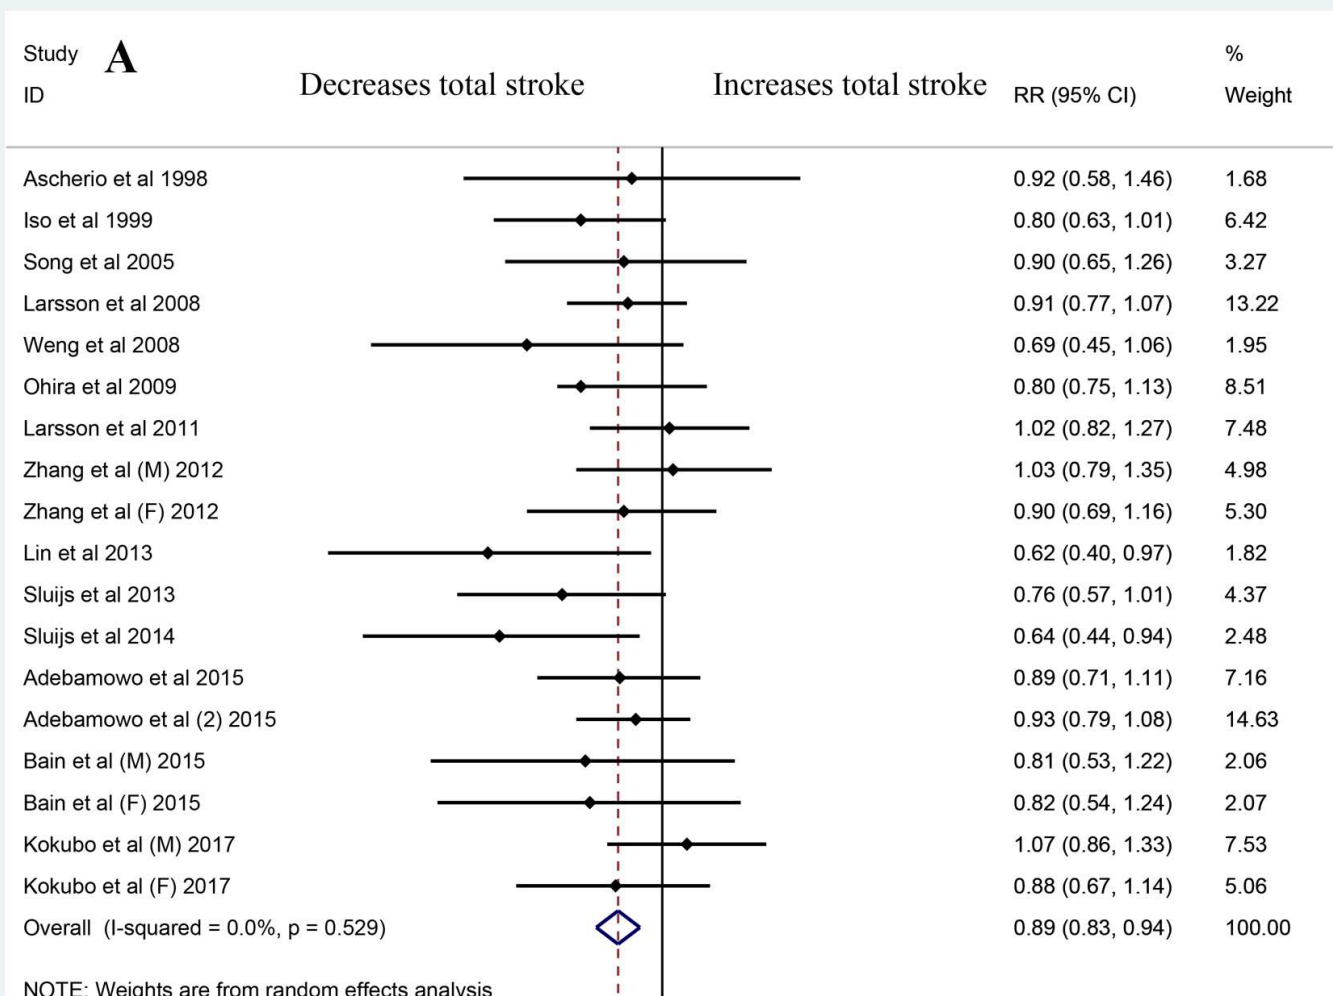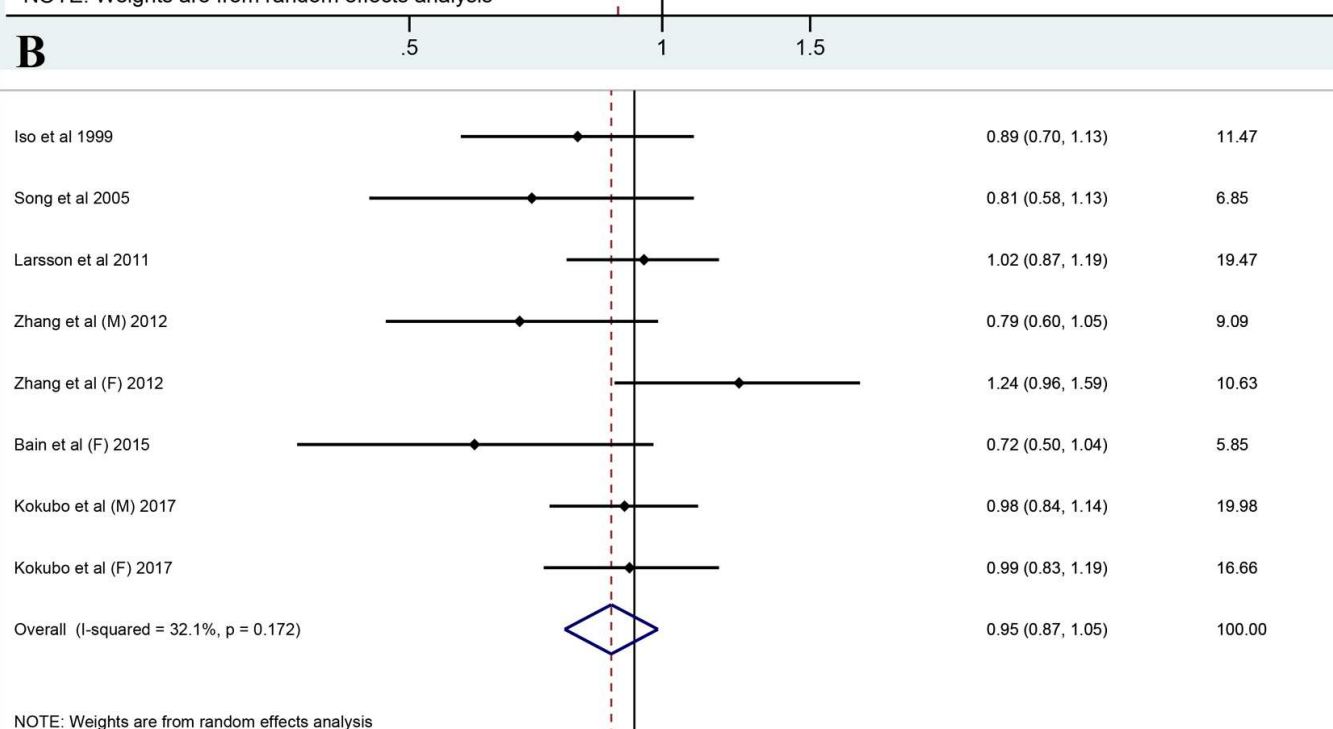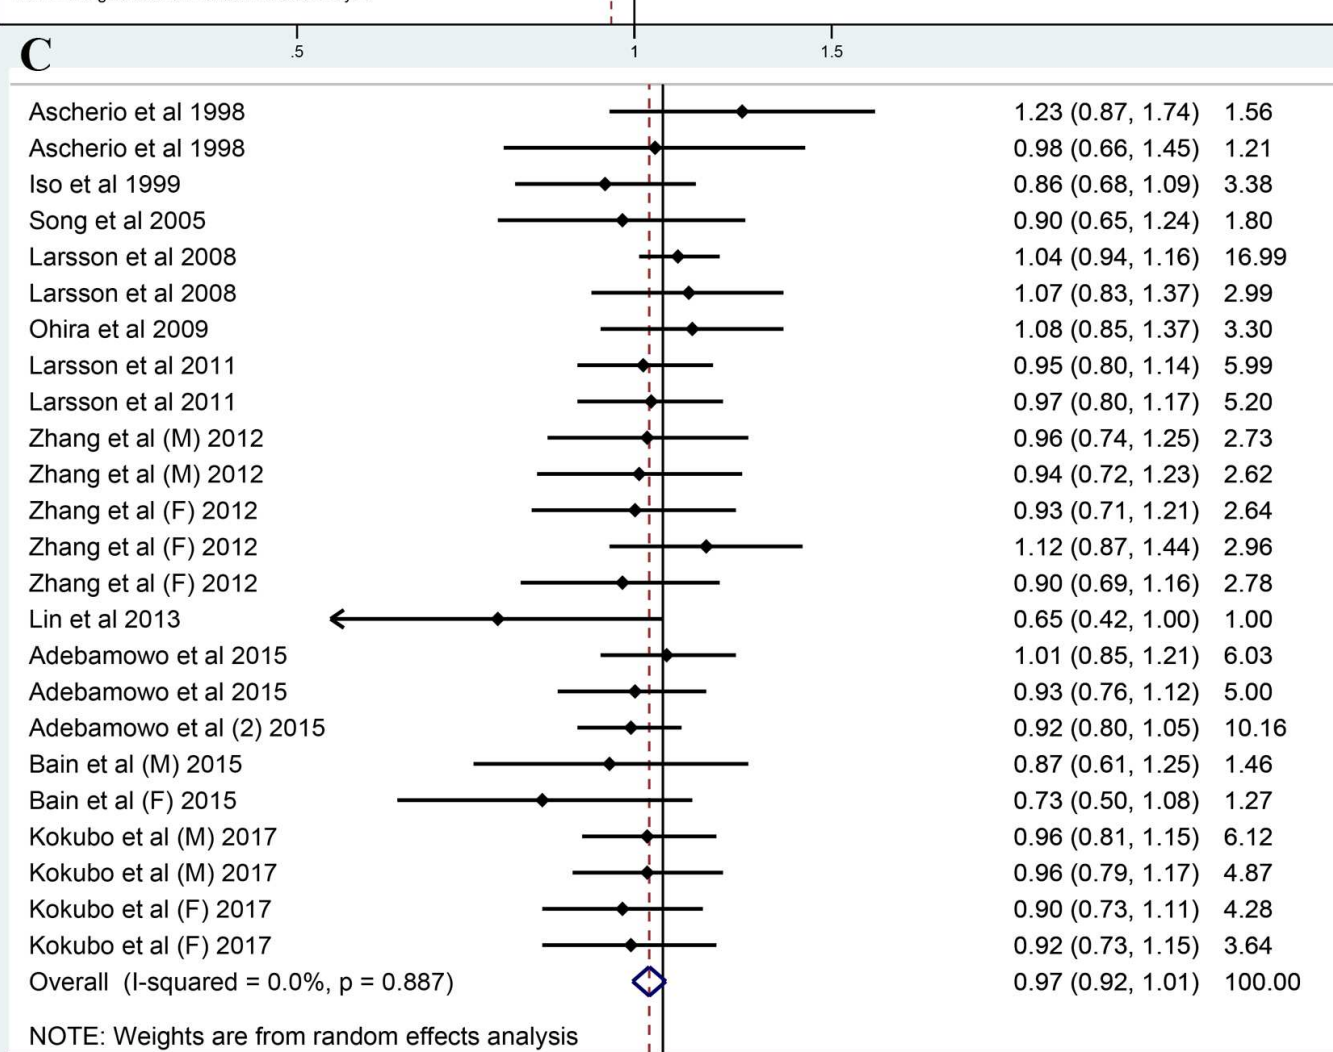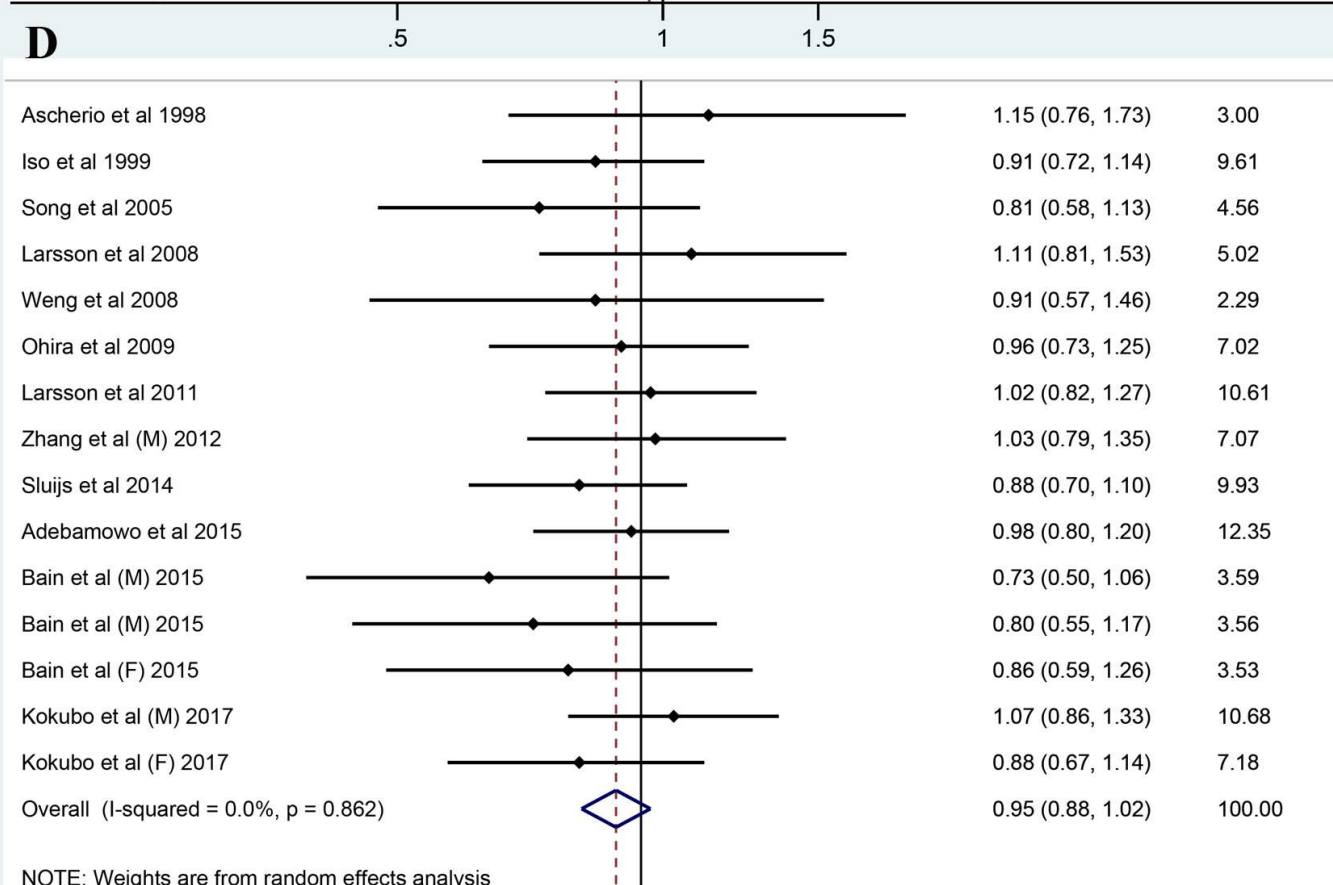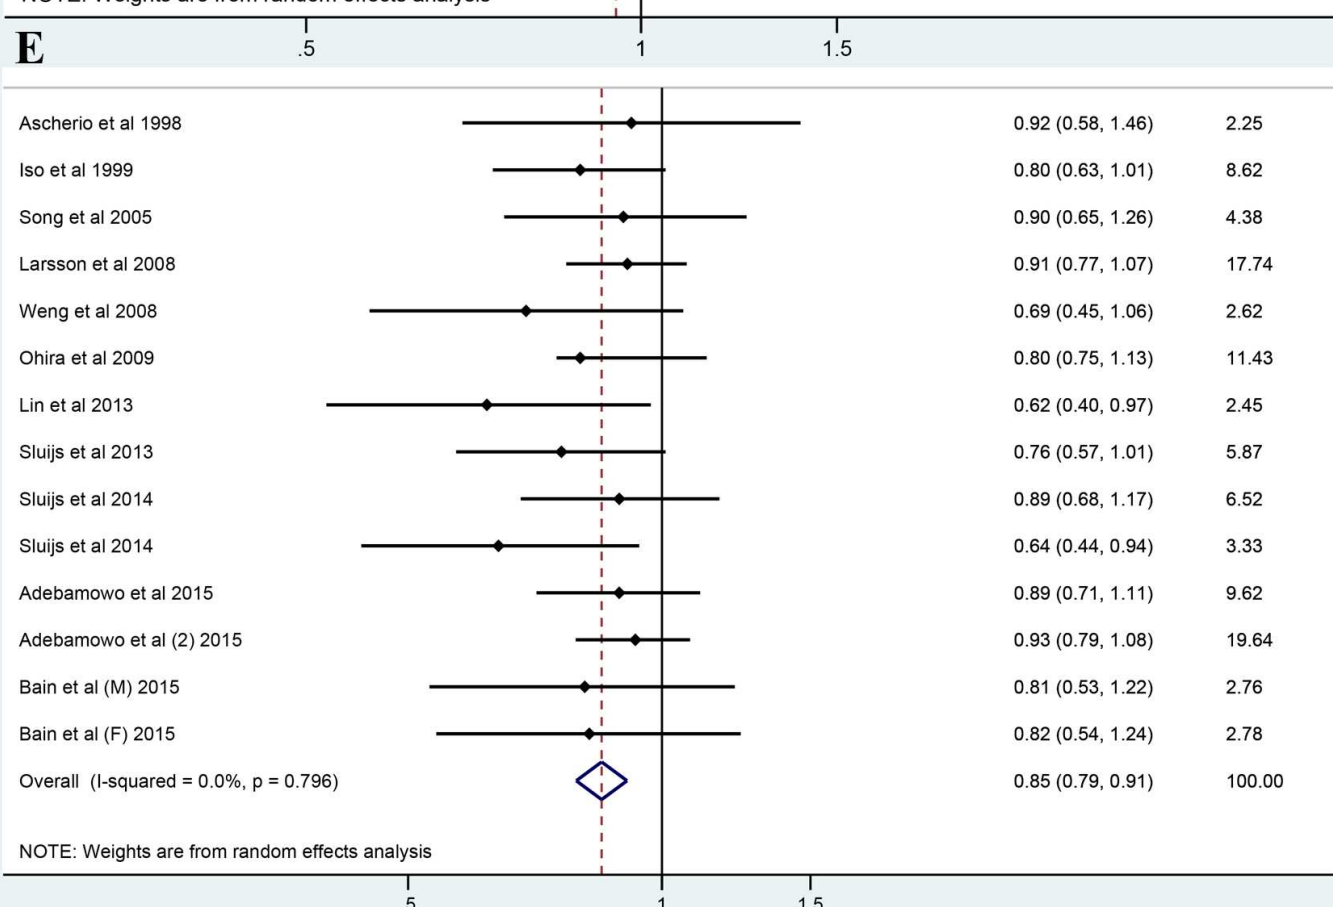

Supplement: bmjopen-2019-032240supp007.pdf [file bmjopen-2019-032240supp007.pdf]

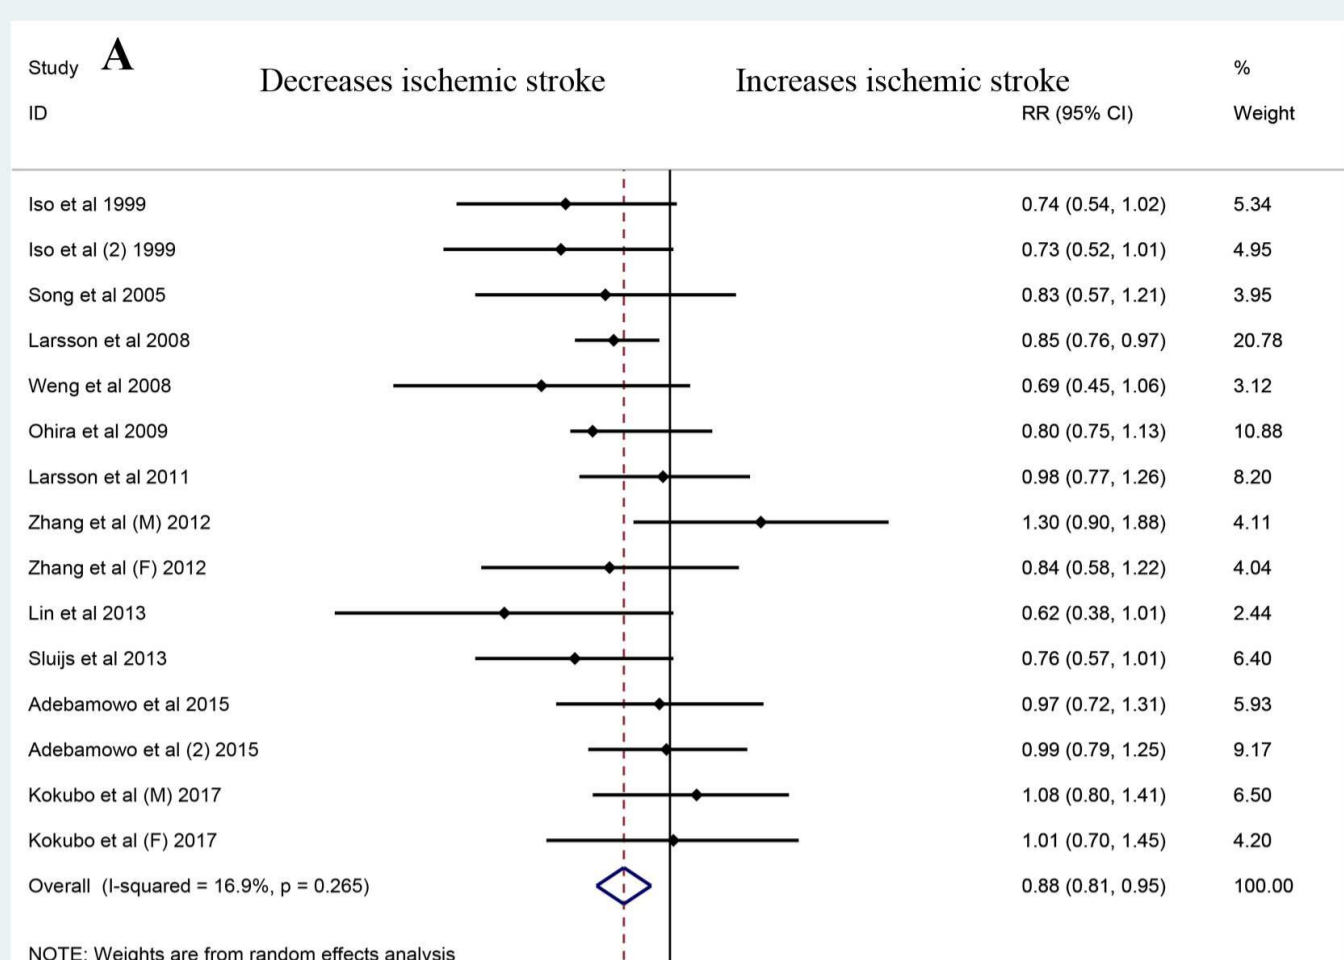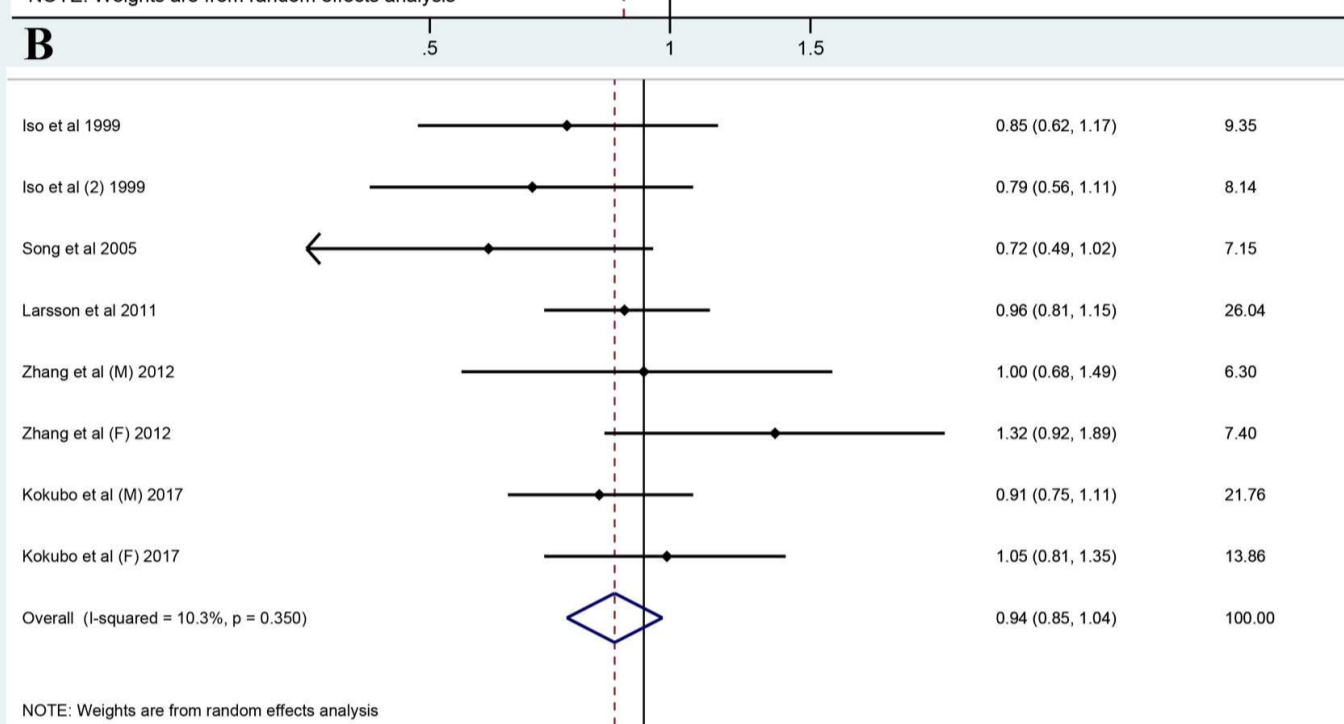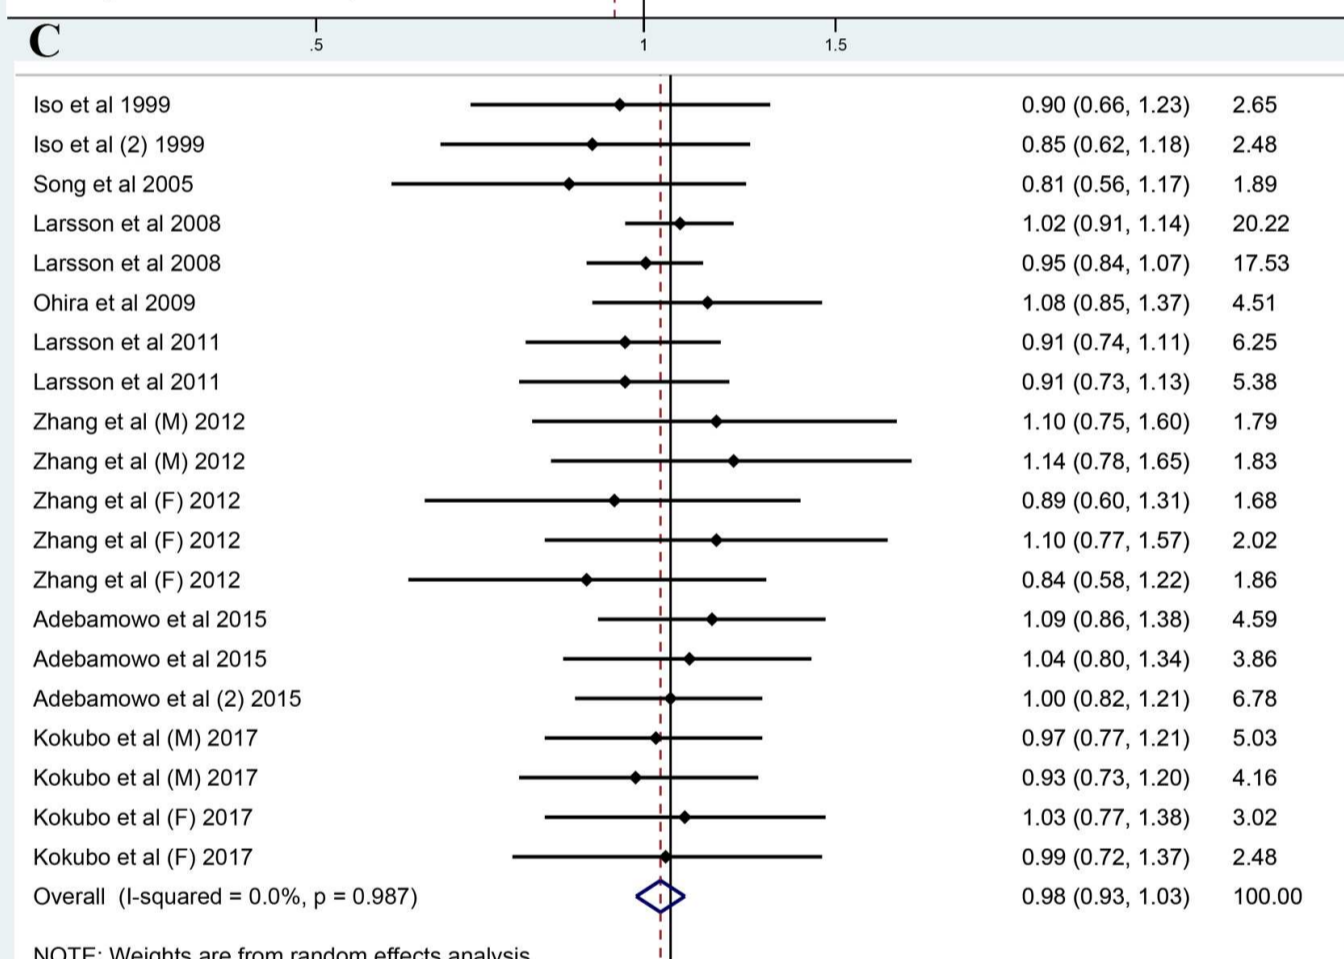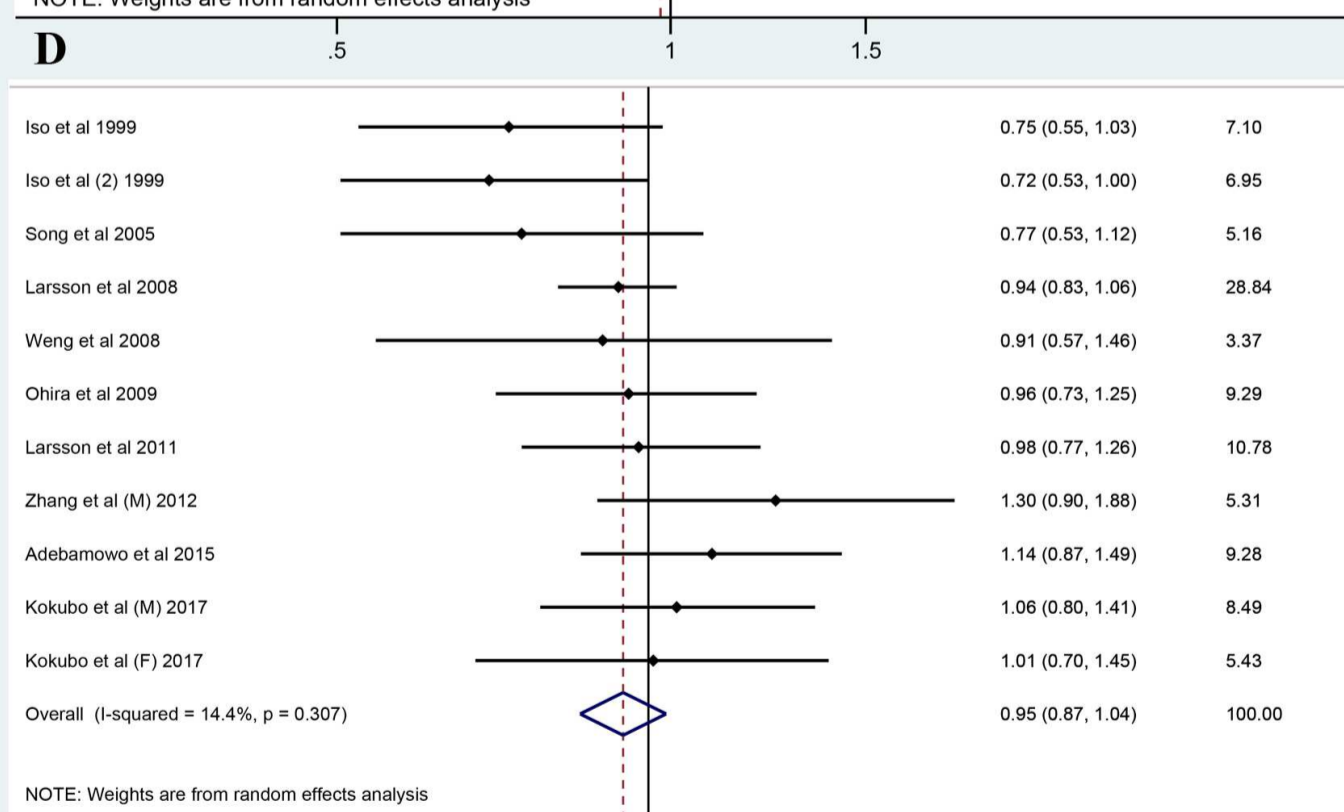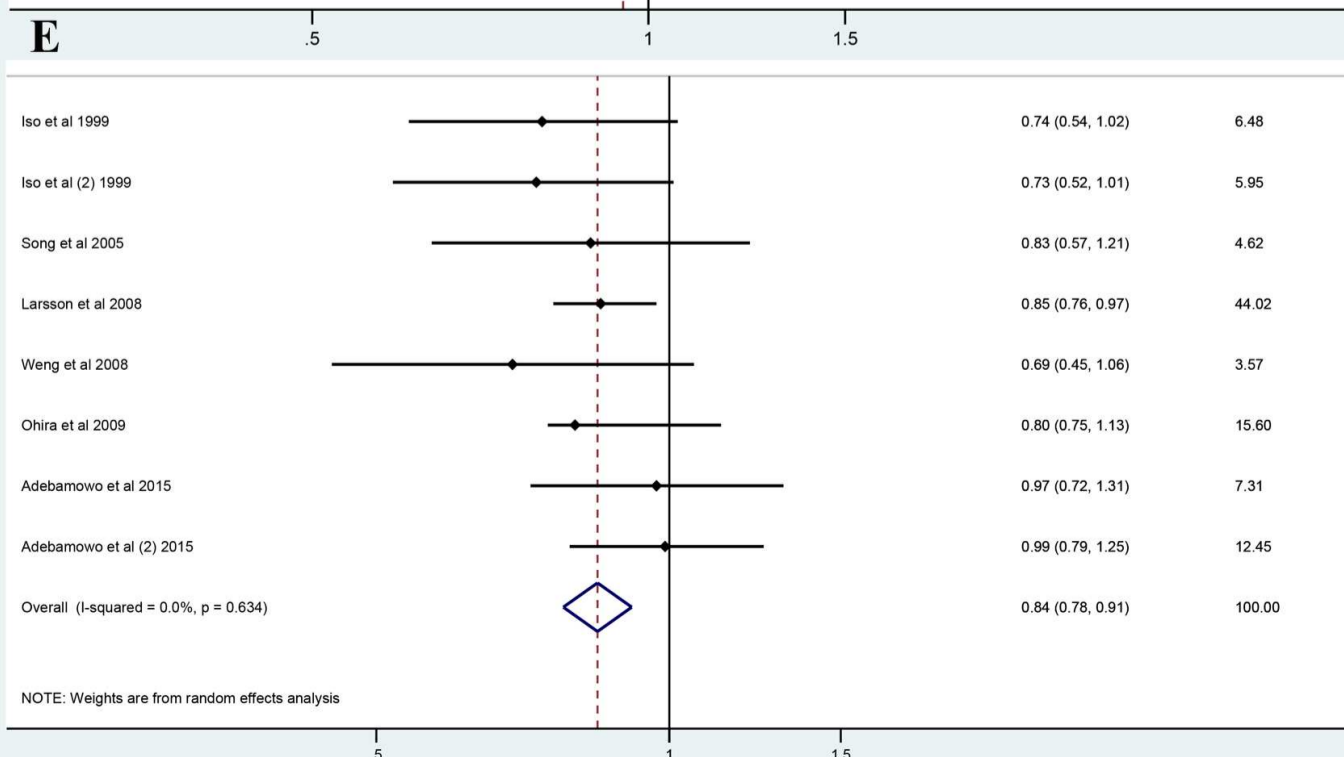

Supplement: bmjopen-2019-032240supp008.pdf [file bmjopen-2019-032240supp008.pdf]

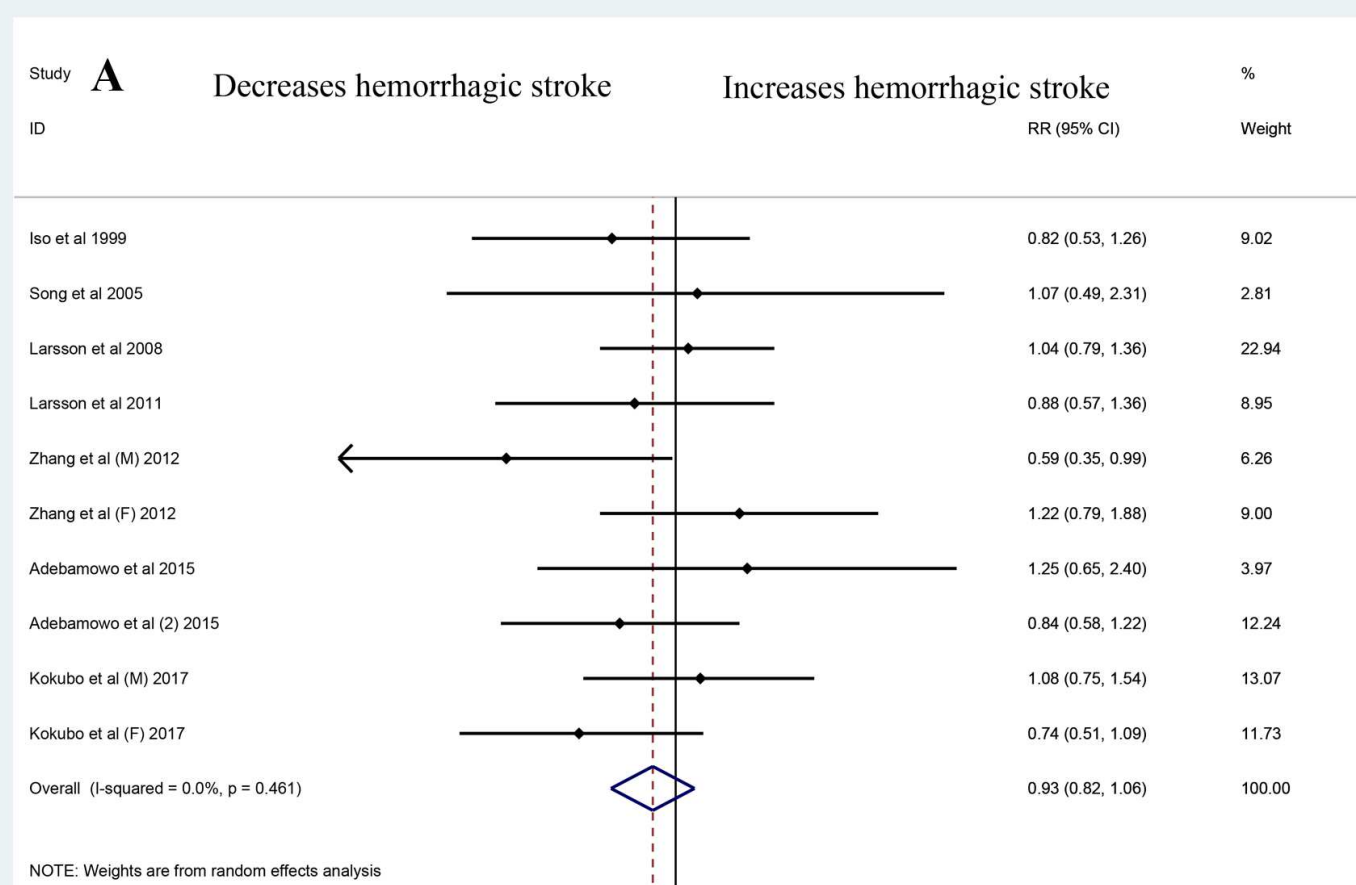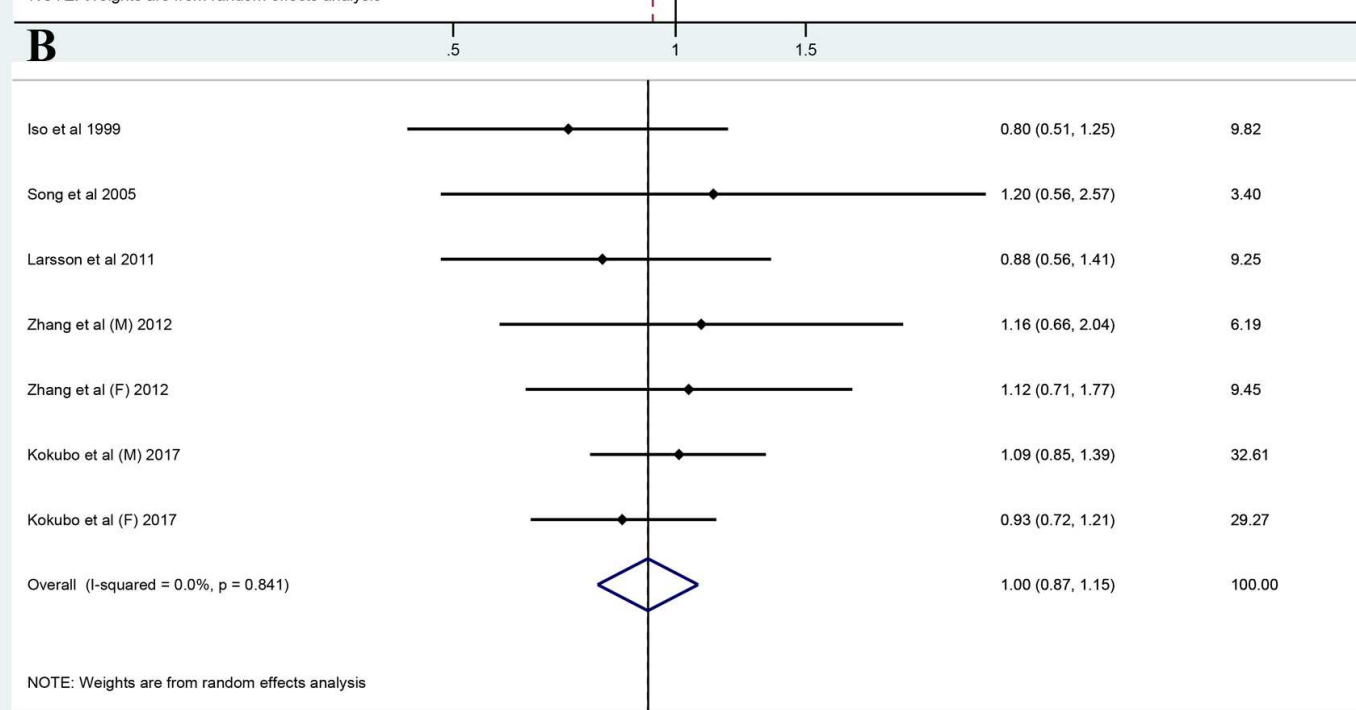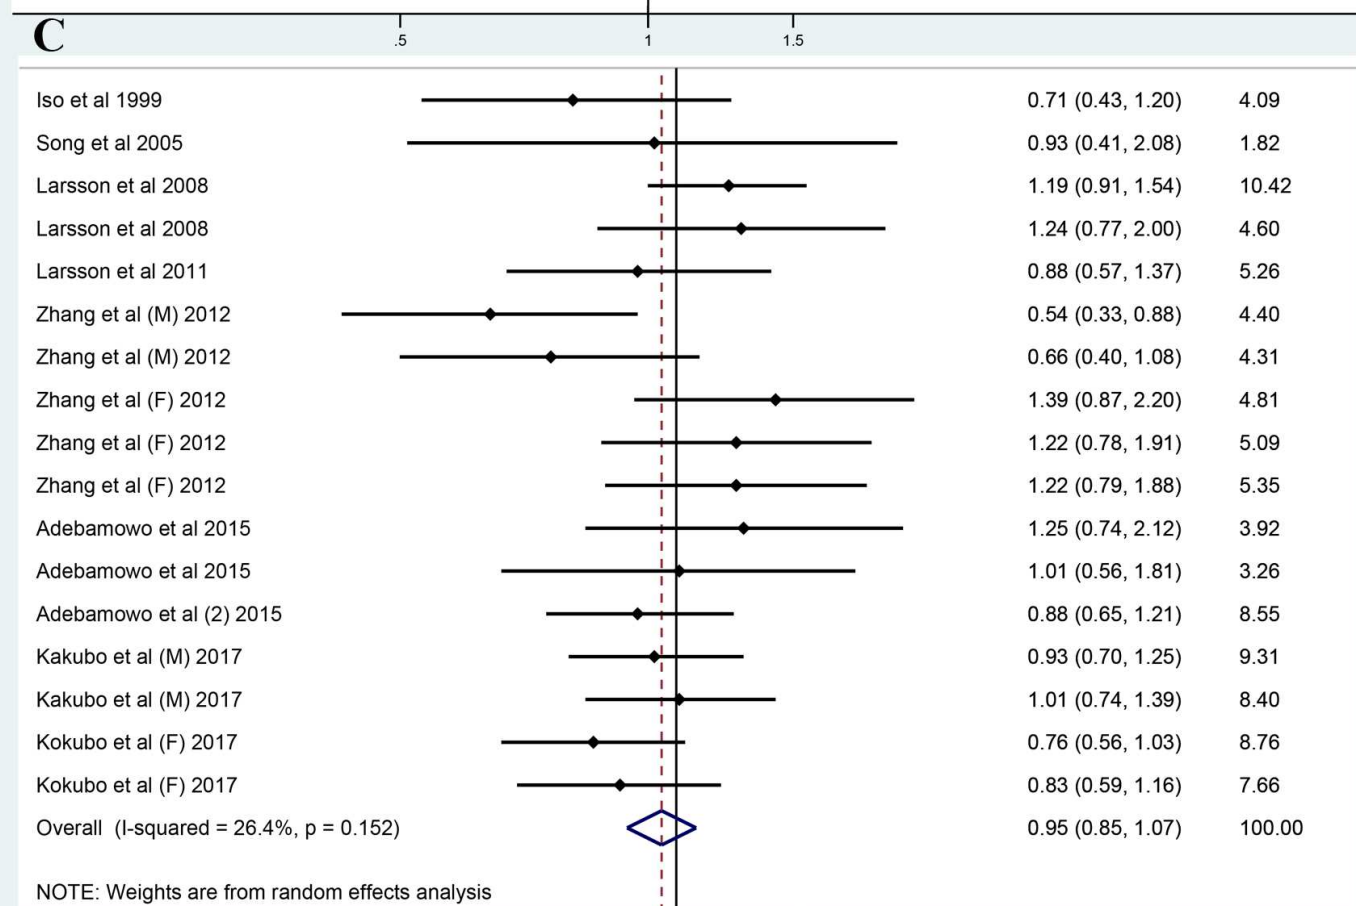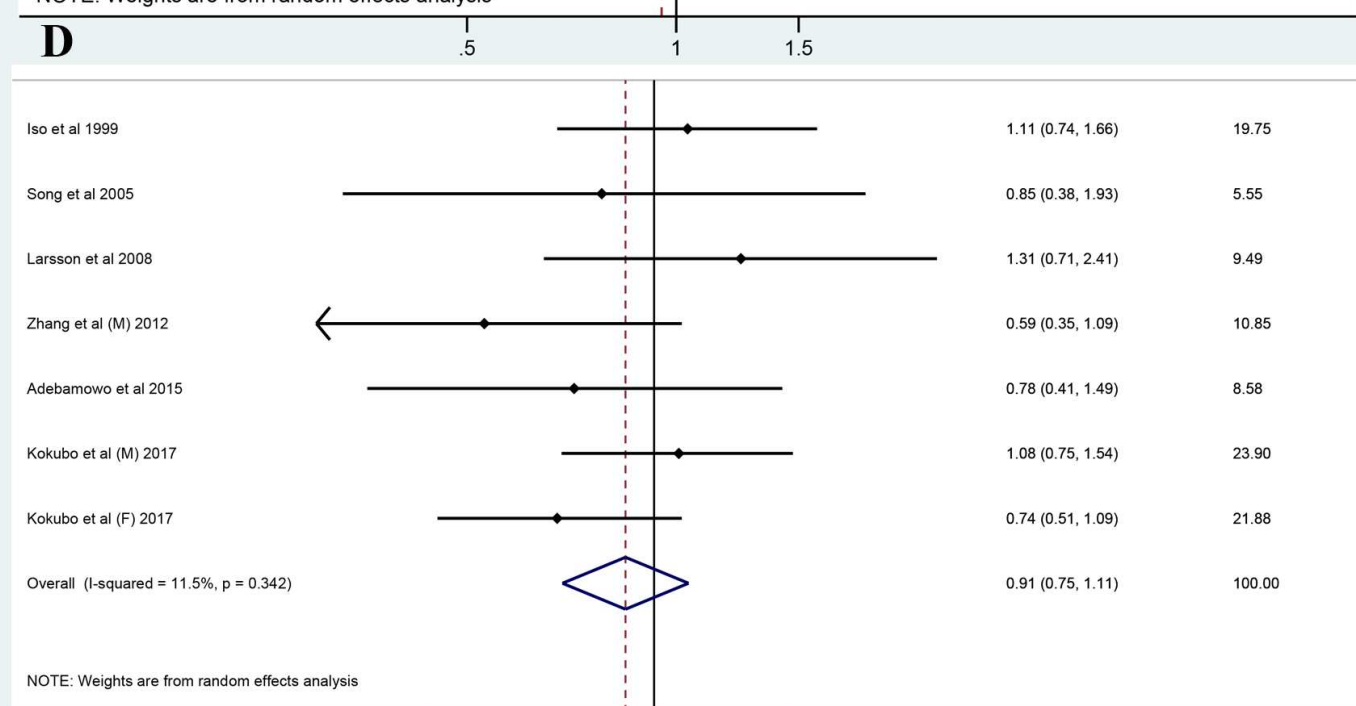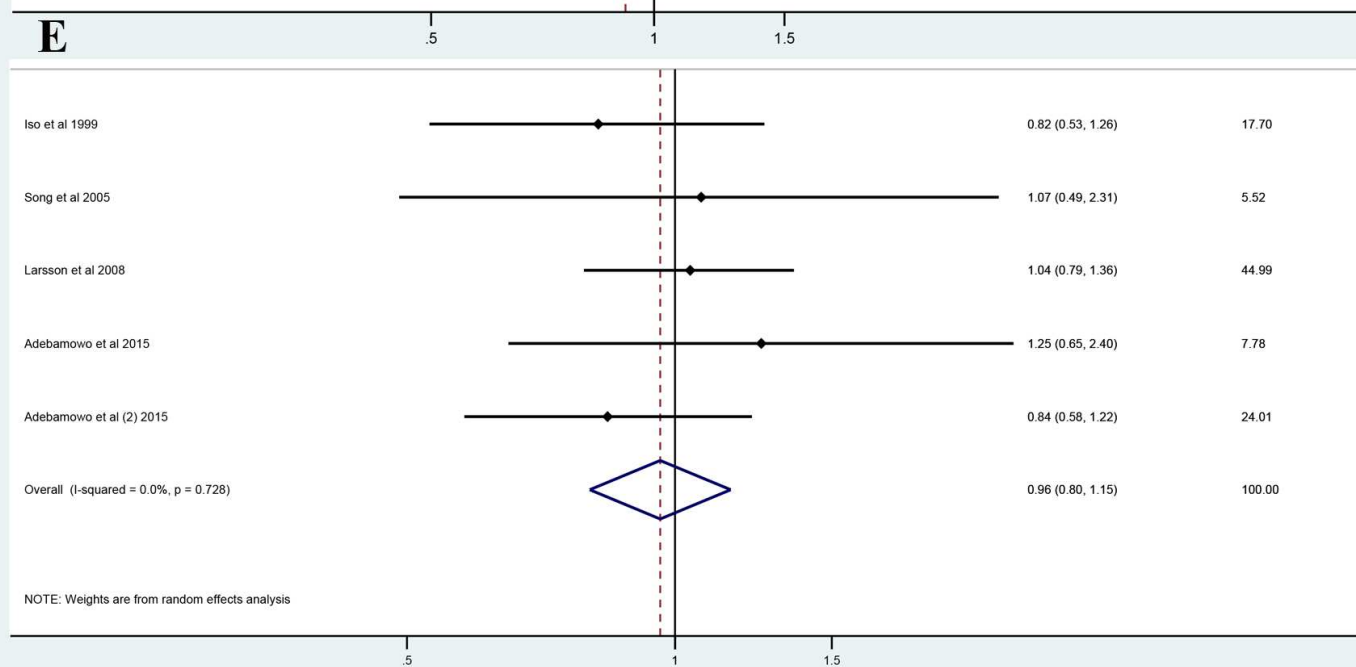

Supplement: bmjopen-2019-032240supp009.pdf [file bmjopen-2019-032240supp009.pdf]

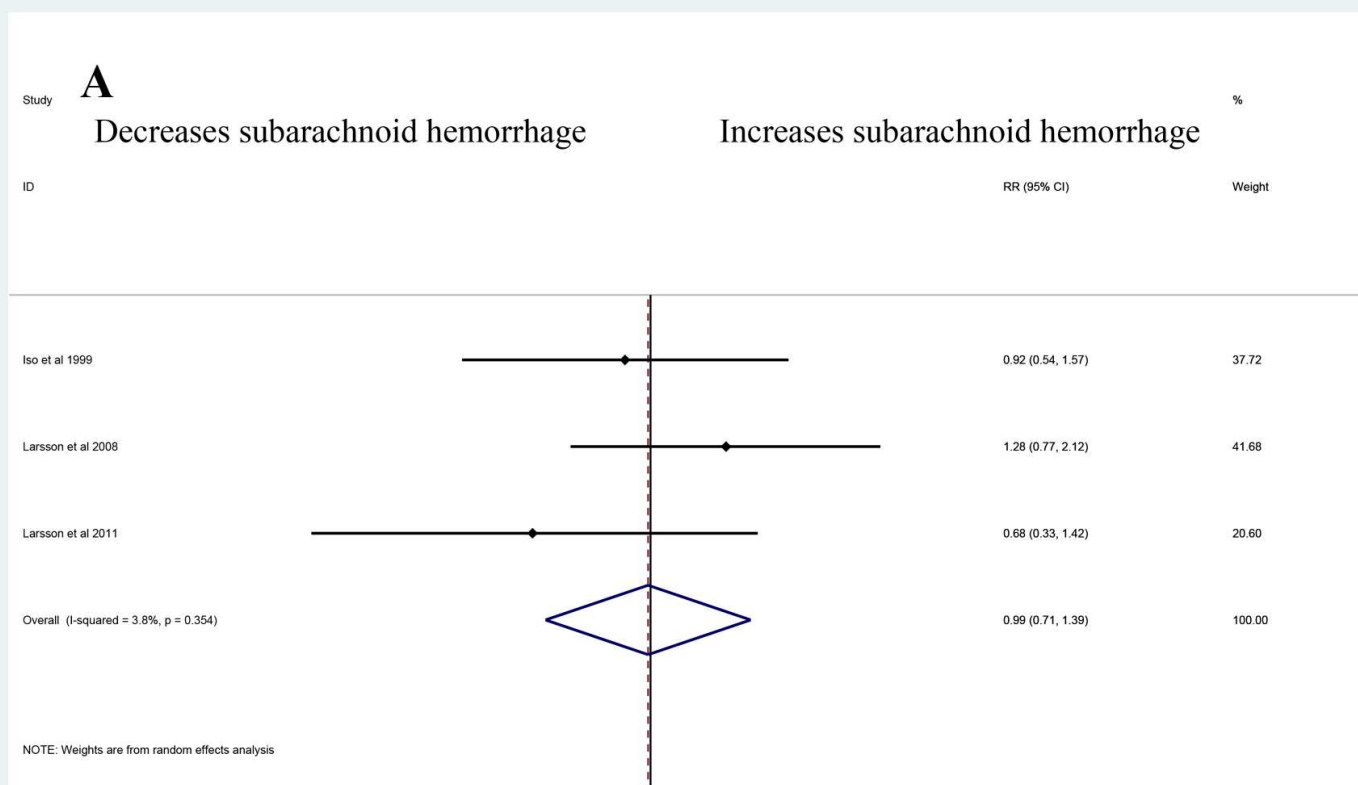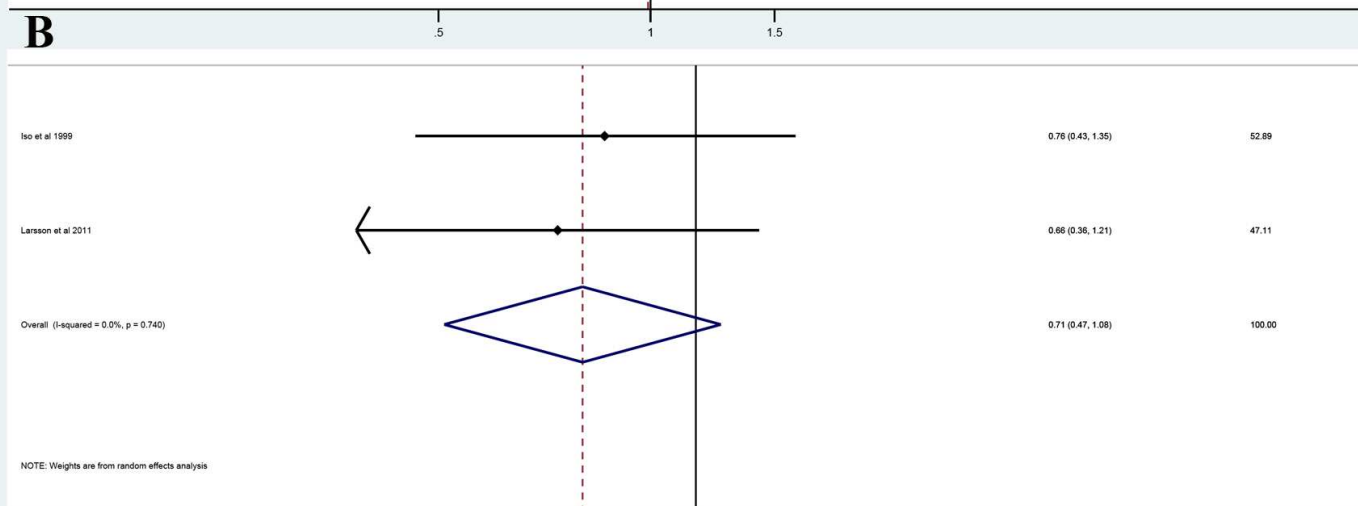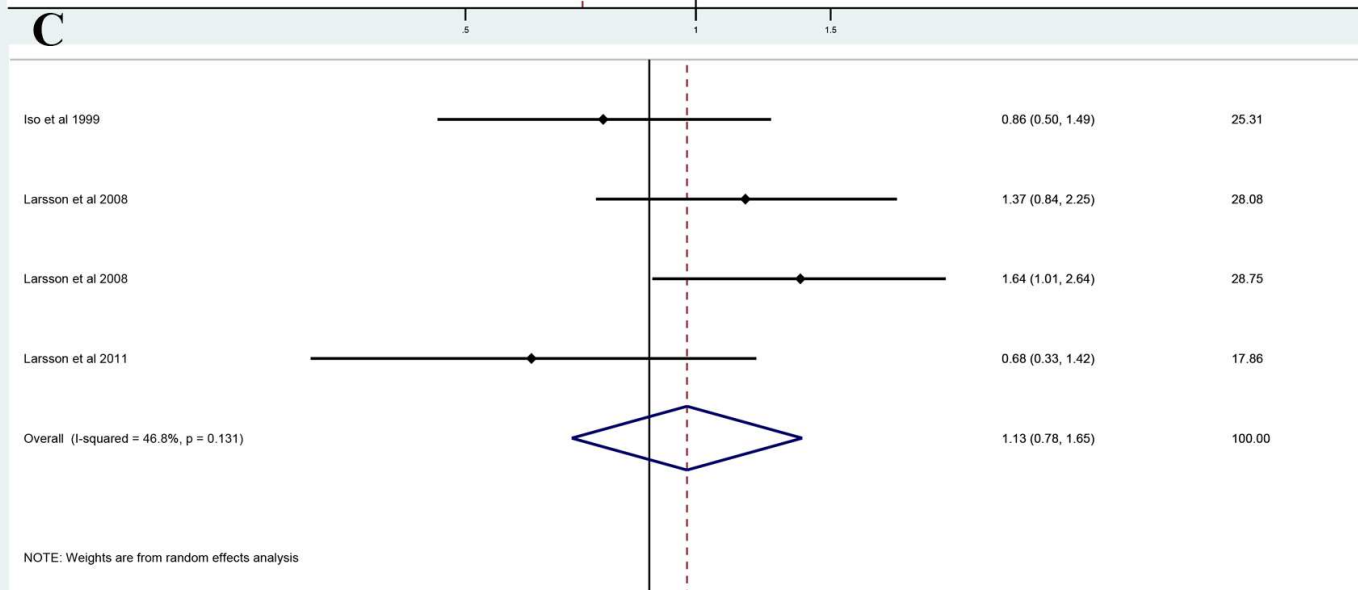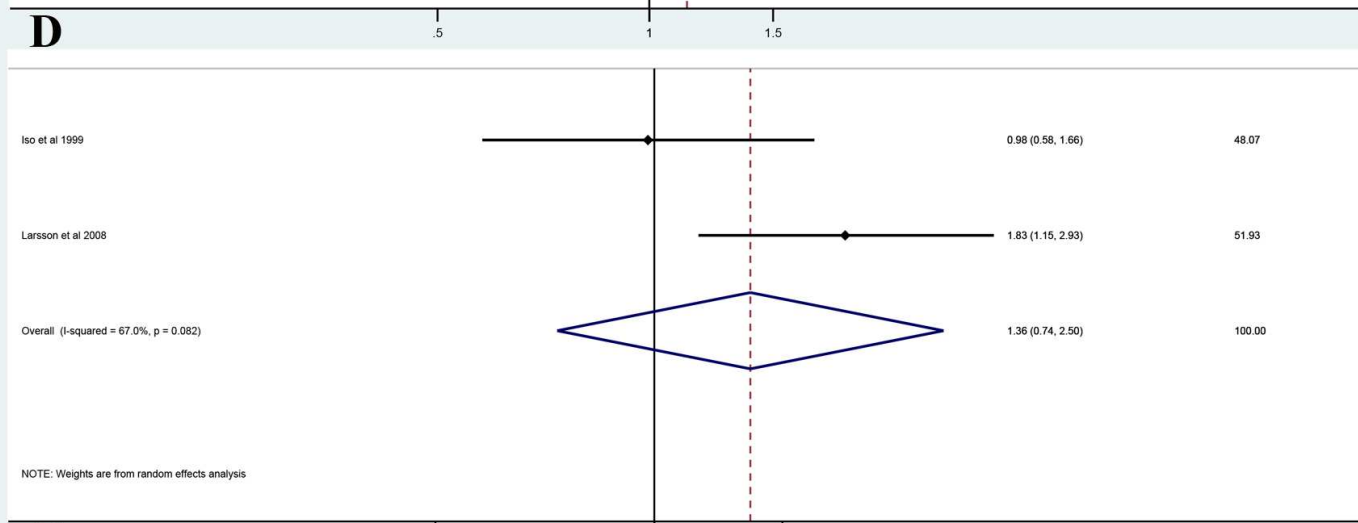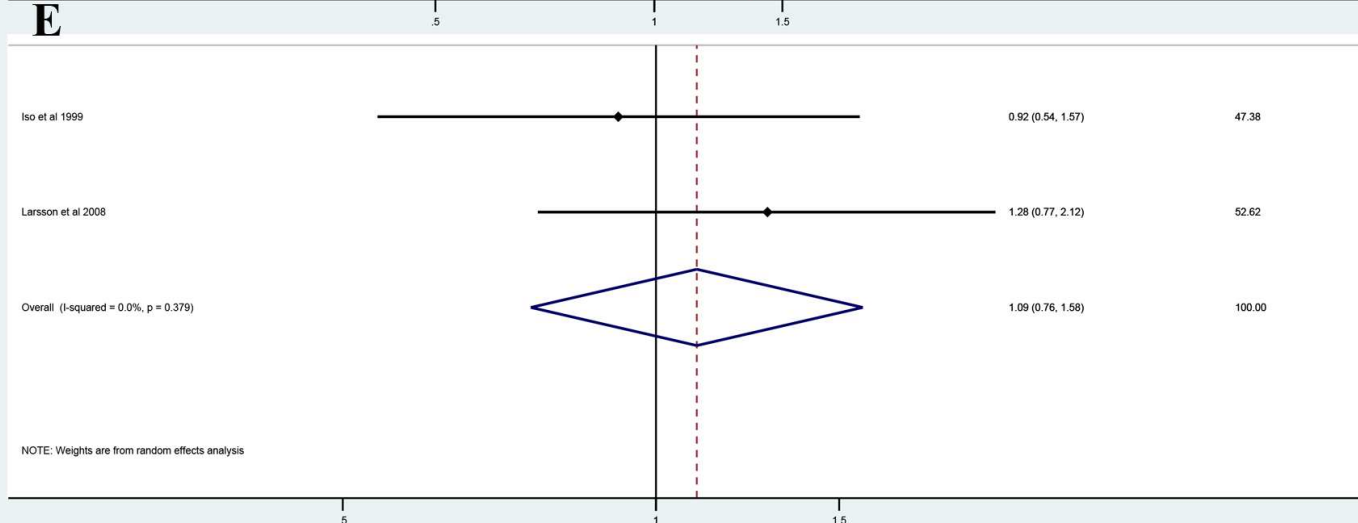

Supplement: bmjopen-2019-032240supp010.pdf [file bmjopen-2019-032240supp010.pdf]

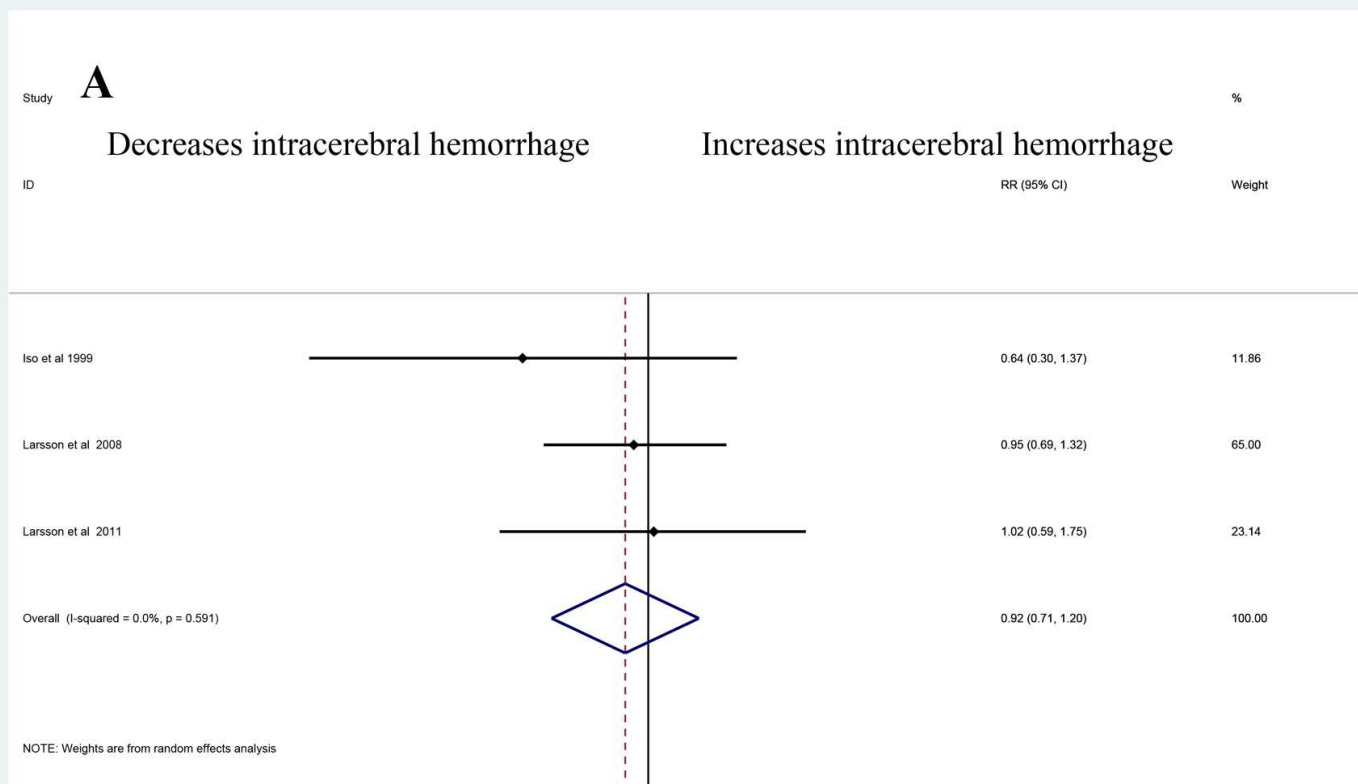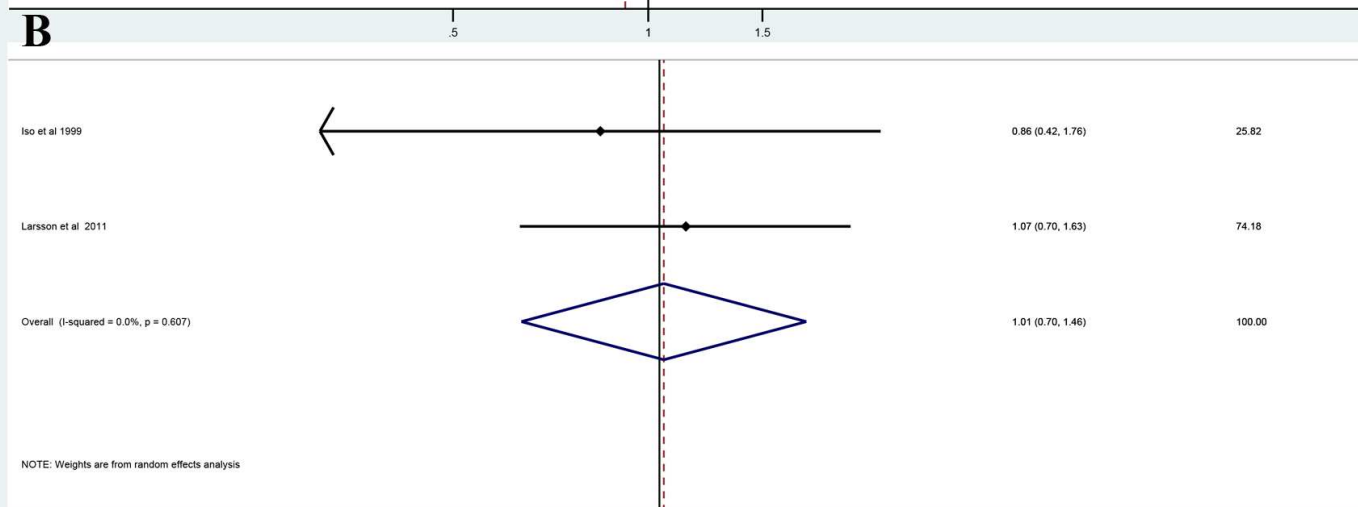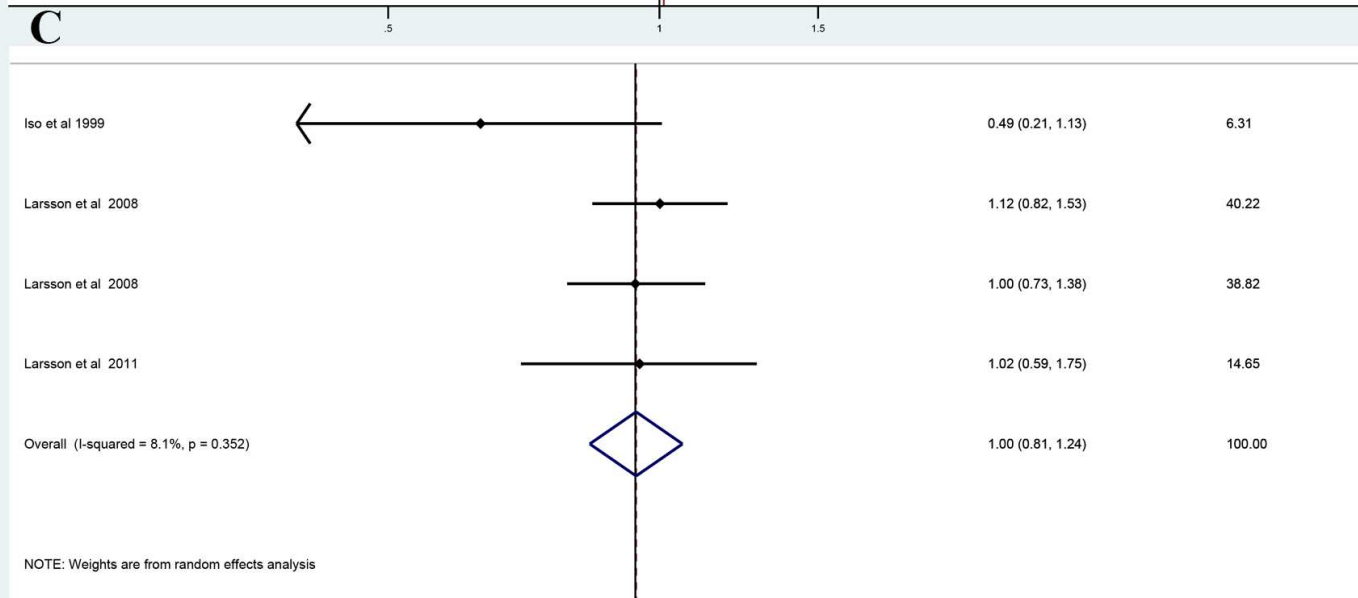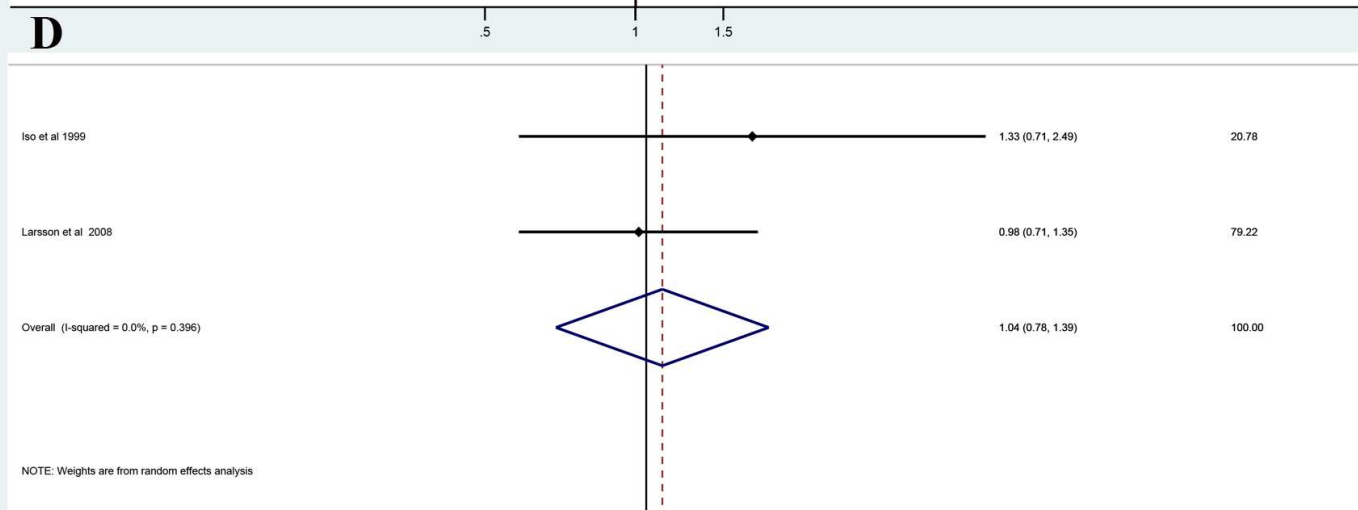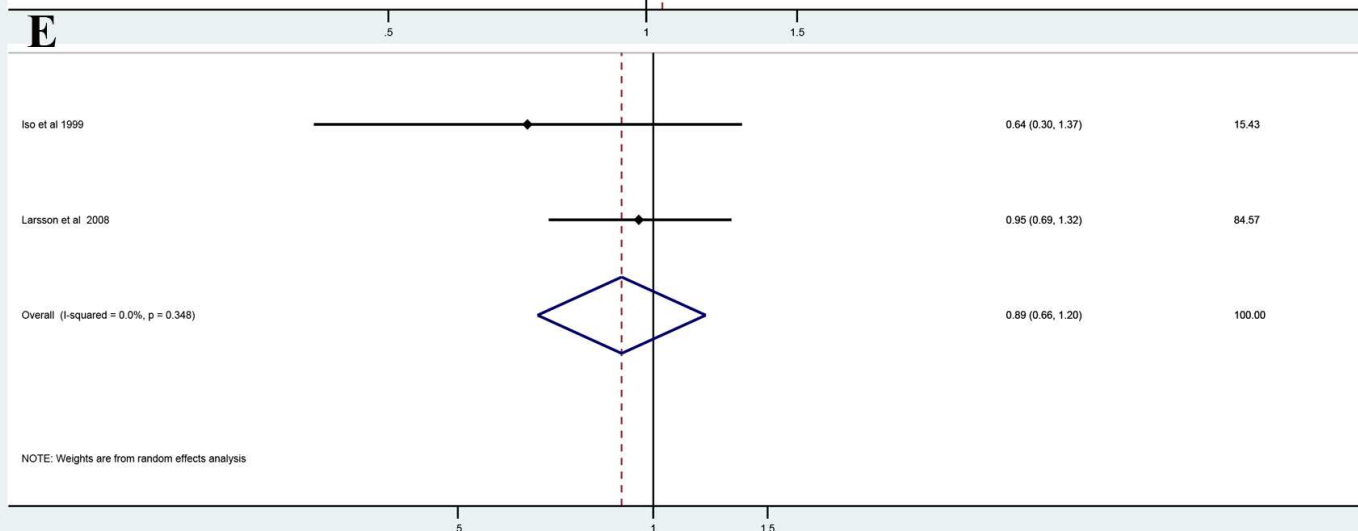

Supplement: bmjopen-2019-032240supp011.pdf [file bmjopen-2019-032240supp011.pdf]

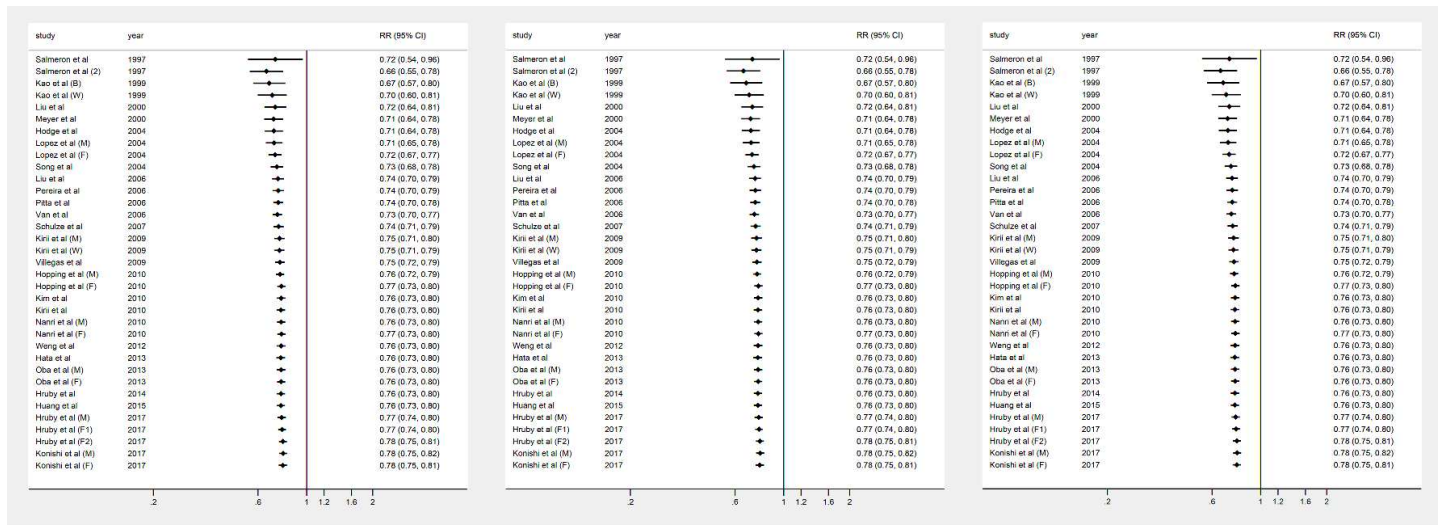

Supplement: bmjopen-2019-032240supp016.pdf [file bmjopen-2019-032240supp016.pdf]

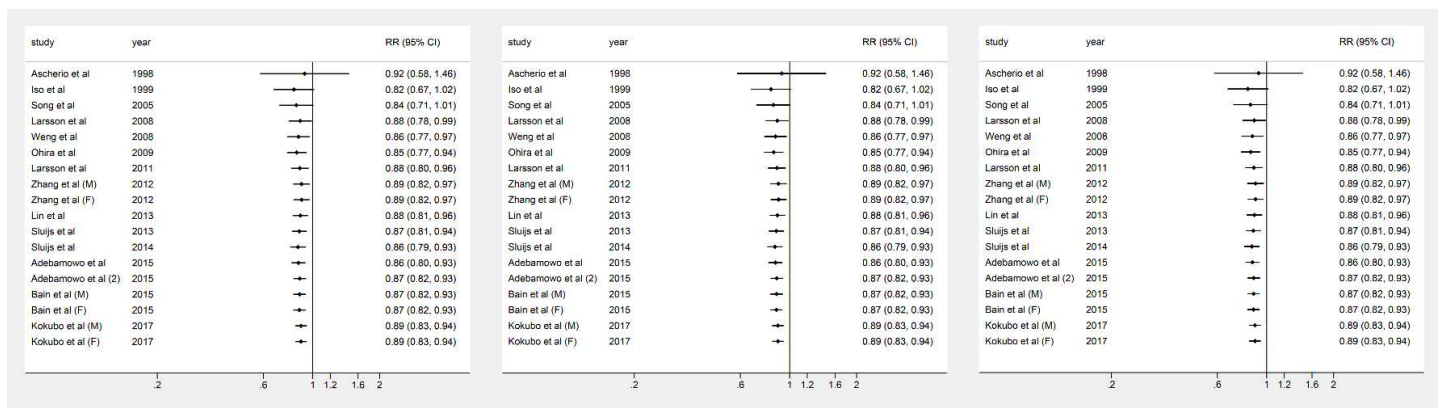

Supplement: bmjopen-2019-032240supp017.pdf [file bmjopen-2019-032240supp017.pdf]

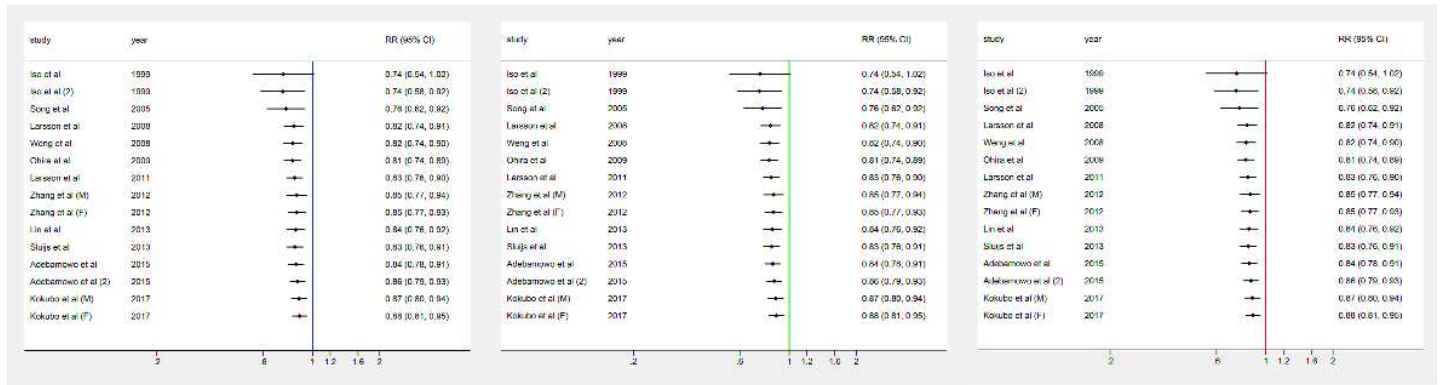

Supplement: bmjopen-2019-032240supp018.pdf [file bmjopen-2019-032240supp018.pdf]

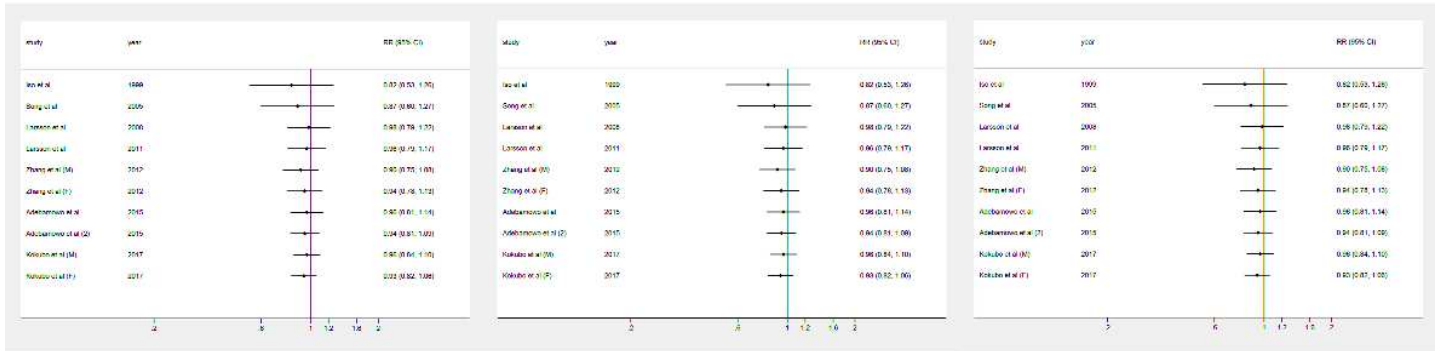

Supplement: bmjopen-2019-032240supp019.pdf [file bmjopen-2019-032240supp019.pdf]

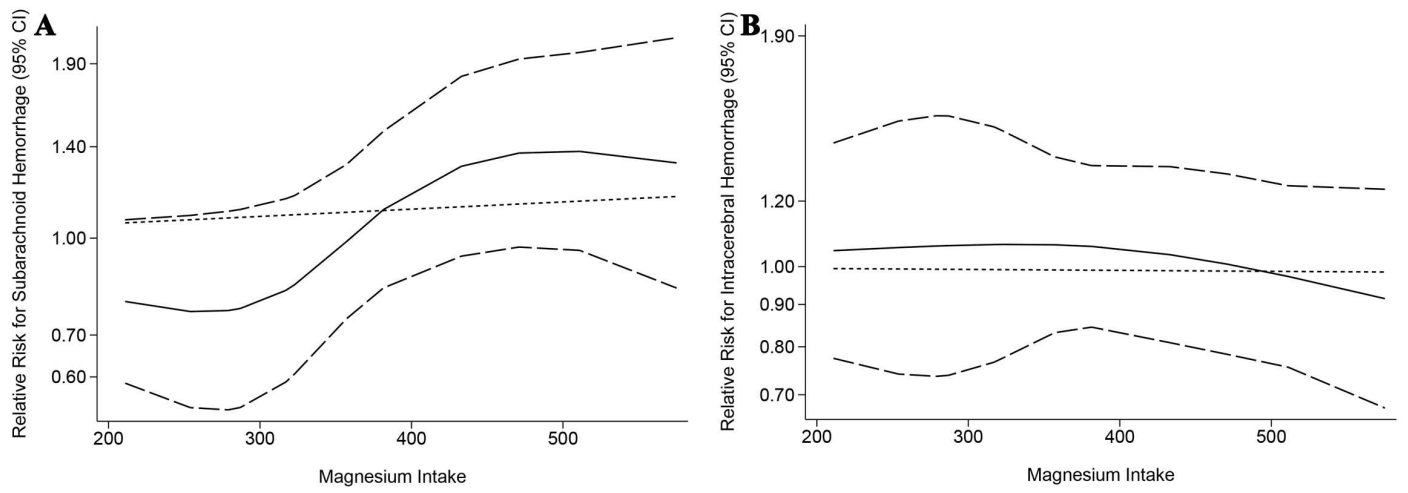

Supplement: bmjopen-2019-032240supp020.pdf [file bmjopen-2019-032240supp020.pdf]
